# Supplementary material for: Y-A+S is the new Y-A-S: Updating microbial life history tradeoffs with comparative genomics
Source: Research Square preprint supplement (doi:10.21203/rs.3.rs-6486618/v1), 2025-05-02
Supplement: Supplementary file 1 [file Table_S1.xlsx]

## Sheet: meta_total
taxon_oid	Domain	Sequencing Status	Study Name	Genome Name / Sample Name	Sequencing Center	IMG Genome ID	Phylum	Class	Order	Family	Genus	Species	High Quality	Is Public	Ecosystem	Ecosystem Category	Ecosystem Subtype	Ecosystem Type	Specific Ecosystem	Geographic Location	Habitat	Genome Size * assembled	Gene Count * assembled
8066638106	Bacteria	Permanent Draft	Taxonomic revisions and descriptions of new bacterial species based on genomic comparisons in the high-G+C-content subgroup of the family Alcaligenaceae	Pusillimonas soli DSM 25264	Eotvos Lorand University	8066638106	Pseudomonadota	Betaproteobacteria	Burkholderiales	Alcaligenaceae	Allopusillimonas	Allopusillimonas soli	Yes	Yes	Environmental	Terrestrial		Soil				4162848	4061
2775507155	Bacteria	Permanent Draft	Large-scale bioinformatics analysis of Bacillus genomes	Bacillus sp. AFS017336	University of North Carolina, Chapel Hill	2775507155	Bacillota	Bacilli	Bacillales	Bacillaceae	Bacillus	Bacillus sp. AFS017336	Yes	Yes	Environmental	Terrestrial	Unclassified	Soil	Unclassified	USA: New York		5682765	5307
2545824503	Bacteria	Permanent Draft	Pyrinomonas methylaliphatogenes K22	Pyrinomonas methylaliphatogenes K22	Harvard University, University of Waikato	2545824503	Acidobacteriota	Blastocatellia	Blastocatellales	Pyrinomonadaceae	Pyrinomonas	Pyrinomonas methylaliphatogenes	No	Yes	Environmental	Terrestrial	Unclassified	Soil	Unclassified	Mt. Ngauruhoe, New Zealand		3795097	3245
2563366745	Bacteria	Permanent Draft	Actinoalloteichus spitiensis RMV-1378	Actinoalloteichus spitiensis RMV-1378	Genotypic Technology	2563366745	Actinomycetota	Actinomycetes	Pseudonocardiales	Pseudonocardiaceae	Actinoalloteichus	Actinoalloteichus spitiensis	Yes	Yes	Environmental	Terrestrial	Unclassified	Soil	Unclassified	Spiti Valley, Himachal Pradesh , Indian Himalayas	Soil	5706534	5214
3003465734	Bacteria	Permanent Draft	Whole-genome sequencing of Cupriavidus and Ralstonia type and reference strains	Cupriavidus numazuensis LMG 26411	Ghent University	3003465734	Pseudomonadota	Betaproteobacteria	Burkholderiales	Burkholderiaceae	Cupriavidus	Cupriavidus numazuensis	Yes	Yes	Environmental	Terrestrial	Unclassified	Soil	Unclassified			9041797	8482
2891367481	Bacteria	Permanent Draft	Genome sequencing of Blastopirellula marina HEX-2 MGV	Blastopirellula marina HEX-2 MGV	University of Sao Paulo	2891367481	Planctomycetota	Planctomycetia	Pirellulales	Pirellulaceae	Blastopirellula	Blastopirellula marina	Yes	Yes	Environmental	Terrestrial	Unclassified	Soil	Unclassified	Brazil: Sao Paulo		6638894	5562
2808606909	Bacteria	Permanent Draft	Burkholderia Genome sequencing - Northern Arizona University	Burkholderia ubonensis MSMB1520WGS	Northern Arizona University	2808606909	Pseudomonadota	Betaproteobacteria	Burkholderiales	Burkholderiaceae	Burkholderia	Burkholderia ubonensis	Yes	Yes	Environmental	Terrestrial	Unclassified	Soil	Unclassified	Australia: Tanami East, Northern Territory		6127112	5626
2885786713	Bacteria	Permanent Draft	Bacterial Consortium Driven PET Biodegradation	Pseudomonas sp. 9.2	Oregon State University	2885786713	Pseudomonadota	Gammaproteobacteria	Pseudomonadales	Pseudomonadaceae	Pseudomonas	unclassified	Yes	Yes	Environmental	Terrestrial	Unclassified	Soil	Contaminated	USA, East Beach, Galveston, TX		6216025	5804
2503692000	Bacteria	Permanent Draft	Hyphomicrobium sulfonivorans S1	Hyphomicrobium sulfonivorans S1	University of Edinburgh	2503692000	Pseudomonadota	Alphaproteobacteria	Hyphomicrobiales	Hyphomicrobiaceae	Hyphomicrobium	Hyphomicrobium sulfonivorans	Yes	Yes	Environmental	Terrestrial	Unclassified	Soil	Unclassified	Warwickshire	Soil	3986593	3805
2999650683	Bacteria	Finished	Aquihabitans sp. G128 Genome sequencing	Aquihabitans sp. G128	Hankyong National University	2999650683	Actinomycetota	Acidimicrobiia	Acidimicrobiales	Iamiaceae	Aquihabitans	Aquihabitans sp. G128	Yes	Yes	Environmental	Terrestrial	Garden	Soil	Unclassified	South Korea: yeongju		4938963	4858
8052122714	Bacteria	Permanent Draft	Genome sequencing of Bacillus velezensis strains	Bacillus velezensis AP194	Auburn University	8052122714	Bacillota	Bacilli	Bacillales	Bacillaceae	Bacillus	Bacillus velezensis	Yes	Yes	Environmental	Terrestrial	Unclassified	Soil	Unclassified			3989402	4064
3006619106	Bacteria	Permanent Draft	Streptomyces sp. 130 genome sequencing	Streptomyces sp. 130	Microbial Technology Lab, Acharya Narendra Dev College, University of Delhi	3006619106	Actinomycetota	Actinomycetes	Kitasatosporales	Streptomycetaceae	Streptomyces	Streptomyces sp. 130	Yes	Yes	Environmental	Terrestrial	Unclassified	Soil	Unclassified	India: Faridabad		7140426	6479
8076503094	Bacteria	Permanent Draft	Shinella sp. CPCC 101442 genome sequencing	Shinella sp. CPCC 101442	Institute of Medicinal Biotechnology Chinese Academy of Medical Sciences	8076503094	Pseudomonadota	Alphaproteobacteria	Hyphomicrobiales	Rhizobiaceae	Shinella	Shinella sp. CPCC 101442	Yes	Yes	Environmental	Terrestrial	Unclassified	Soil	Unclassified	China: Yunnan, Erhai lake		6129101	5933
2999178367	Bacteria	Permanent Draft	Genome sequencing to further insight into bacterial adaptation of environment and study on the phylogeny of them	Sabulicella rubraurantiaca SYSU D01096	Sun Yat-Sen University	2999178367	Pseudomonadota	Alphaproteobacteria	Rhodospirillales	Acetobacteraceae	Sabulicella	Sabulicella rubraurantiaca	Yes	Yes	Environmental	Terrestrial	Desert	Soil	Unclassified	China: Xinjiang		5017681	4968
2773857892	Bacteria	Finished	Genome sequencing of Sutcliffiella cohnii DSM 6307	Sutcliffiella cohnii DSM 6307	Kyungpook National University	2773857892	Bacillota	Bacilli	Bacillales	Bacillaceae	Sutcliffiella	Sutcliffiella cohnii	Yes	Yes	Environmental	Terrestrial	Unclassified	Soil	Unclassified			4899141	5066
2834527210	Bacteria	Permanent Draft	Nitrosomonas supralitoralis APG5 genome sequencing	Nitrosomonas supralitoralis APG5	Florida Gulf Coast University	2834527210	Pseudomonadota	Betaproteobacteria	Nitrosomonadales	Nitrosomonadaceae	Nitrosomonas	Nitrosomonas supralitoralis	Yes	Yes	Environmental	Terrestrial	Sand	Soil	Unclassified	USA: Seattle, Washington		3751701	3720
8052190759	Bacteria	Permanent Draft	Genome sequences of foodborne bacterial pathogens - FDA	Bacillus velezensis CFSAN034339	Center for Food Safety and Applied Nutrition, FDA (FDA/CFSAN)	8052190759	Bacillota	Bacilli	Bacillales	Bacillaceae	Bacillus	Bacillus velezensis	Yes	Yes	Environmental	Terrestrial	Unclassified	Soil	Agricultural land			4209526	4401
2687453372	Bacteria	Finished	Sporosarcina psychrophila DSM 6497 genome sequencing	Sporosarcina psychrophila DSM 6497	Shanghai Jiao Tong University	2687453372	Bacillota	Bacilli	Bacillales	Planococcaceae	Sporosarcina	Sporosarcina psychrophila	Yes	Yes	Environmental	Terrestrial	Garden	Soil	Unclassified			4674191	4607
647533234	Bacteria	Permanent Draft	Streptomyces sp. SPB74	Streptomyces sp. SPB74	Broad Institute	647533234	Actinomycetota	Actinomycetes	Kitasatosporales	Streptomycetaceae	Streptomyces	Streptomyces sp. SPB074	Yes	Yes	Environmental	Terrestrial	Unclassified	Soil	Unclassified		Soil	6970553	5808
2893000265	Bacteria	Permanent Draft	Sphingosinicella sp. YJ22 genome sequencing	Sphingosinicella sp. YJ22	Institute of Microbial Ecology and Resources	2893000265	Pseudomonadota	Alphaproteobacteria	Sphingomonadales	Sphingosinicellaceae	Sphingosinicella	Sphingosinicella sp. YJ22	Yes	Yes	Environmental	Terrestrial	Unclassified	Soil	Unclassified	South Korea: Shinnan, Bigeum island		2974857	3149
2977837220	Bacteria	Permanent Draft	Mesorhizobia in Australia	Mesorhizobium sp. B2-5-8	Curtin University	2977837220	Pseudomonadota	Alphaproteobacteria	Hyphomicrobiales	Phyllobacteriaceae	Mesorhizobium	Mesorhizobium sp. B2-5-8	Yes	Yes	Environmental	Terrestrial	Unclassified	Soil	Unclassified	Australia: WA, Badgingarra		6550961	6487
8056400799	Bacteria	Permanent Draft	Pedobacter polysacchareus ZS13-49 genome sequencing	Pedobacter polysacchareus ZS13-49	Ocean University of China	8056400799	Bacteroidota	Sphingobacteriia	Sphingobacteriales	Sphingobacteriaceae	Pedobacter	Pedobacter polysacchareus	Yes	Yes	Environmental	Terrestrial	Unclassified	Soil	Unclassified	Antarctica		5831107	4995
8038475209	Bacteria	Permanent Draft	Burkholderia Genome sequencing - Northern Arizona University	Burkholderia territorii MSMB1840WGS	Northern Arizona University	8038475209	Pseudomonadota	Betaproteobacteria	Burkholderiales	Burkholderiaceae	Burkholderia	Burkholderia territorii	Yes	Yes	Environmental	Terrestrial	Unclassified	Soil	Unclassified	Australia: Tanami East, Northern Territory		6791740	6235
8065484112	Bacteria	Permanent Draft	Kangiella shandongensis PI Genome sequencing	Kangiella sp. PI	Shandong University	8065484112	Pseudomonadota	Gammaproteobacteria	Kangiellales	Kangiellaceae	Kangiella	Kangiella shandongensis	Yes	Yes	Environmental	Terrestrial	Garden	Soil	Unclassified	China: Yantai		2809662	2745
2754412364	Bacteria	Permanent Draft	Burkholderia Genome sequencing - Northern Arizona University	Burkholderia savannae BDU18	Northern Arizona University	2754412364	Pseudomonadota	Betaproteobacteria	Burkholderiales	Burkholderiaceae	Burkholderia	Burkholderia savannae	Yes	Yes	Environmental	Terrestrial	Unclassified	Soil	Unclassified	Australia: Badu Island, Torres Strait		7159541	6159
3007799056	Bacteria	Permanent Draft	Genome Sequencing of Pseudomonas ullengensis UL070	Pseudomonas ullengensis UL070	Chungnam National University	3007799056	Pseudomonadota	Gammaproteobacteria	Pseudomonadales	Pseudomonadaceae	Pseudomonas	Pseudomonas ullengensis	Yes	Yes	Environmental	Terrestrial	Unclassified	Soil	Unclassified	South Korea: Ulleung-gun		4626005	4295
2690316216	Bacteria	Permanent Draft	Genome sequencing of a diverse group of Burkholderia pseudomallei strains	Burkholderia pseudomallei TRF661	Wellcome Trust Sanger Institute	2690316216	Pseudomonadota	Betaproteobacteria	Burkholderiales	Burkholderiaceae	Burkholderia	Burkholderia pseudomallei	Yes	Yes	Environmental	Terrestrial	Unclassified	Soil	Unclassified			6965617	5790
8052038724	Bacteria	Permanent Draft	Bacillus thuringiensis genome sequencing	Bacillus wiedmannii BGSC 4BK1	Huazhong Agricultural University	8052038724	Bacillota	Bacilli	Bacillales	Bacillaceae	Bacillus	Bacillus wiedmannii	Yes	Yes	Environmental	Terrestrial	Unclassified	Soil	Unclassified	Spain		5921110	6336
2767802261	Bacteria	Permanent Draft	Analysing Pseudmonas diversity in wheat fields in United Kingdom	Pseudomonas sp. 31 E 5	JOHN INNES CENTRE, NORWICH, UK.	2767802261	Pseudomonadota	Gammaproteobacteria	Pseudomonadales	Pseudomonadaceae	Pseudomonas	Pseudomonas sp. 31 E 5	Yes	Yes	Environmental	Terrestrial	Unclassified	Soil	Unclassified			5867213	5433
2841781988	Bacteria	Finished	Lysobacter sp. TY2-98 genome sequencing	Lysobacter sp. TY2-98	Korea Research Institute of Bioscience and Biotechnology	2841781988	Pseudomonadota	Gammaproteobacteria	Xanthomonadales	Xanthomonadaceae	Lysobacter	Lysobacter sp. TY2-98	Yes	Yes	Environmental	Terrestrial	Unclassified	Soil	Unclassified	South Korea		3156619	3064
8045650354	Bacteria	Finished	Flavobacterium bizetiae HJ-32-4 genome sequencing	Flavobacterium bizetiae HJ-32-4	Seoul National University	8045650354	Bacteroidota	Flavobacteriia	Flavobacteriales	Flavobacteriaceae	Flavobacterium	Flavobacterium bizetiae	Yes	Yes	Environmental	Terrestrial	Unclassified	Soil	Unclassified	South Korea	Soil	5745280	5039
2970805243	Bacteria	Permanent Draft	Stenotrophomonas maltophilia DF07 genome sequencing	Stenotrophomonas maltophilia DF07	University of Houston	2970805243	Pseudomonadota	Gammaproteobacteria	Xanthomonadales	Xanthomonadaceae	Stenotrophomonas	Stenotrophomonas maltophilia	Yes	Yes	Environmental	Terrestrial	Unclassified	Soil	Unclassified	USA: Texas, Channelview, Moncrief Park		4801842	4669
3004154435	Bacteria	Permanent Draft	Mesorhizobia in Australia	Mesorhizobium sp. B2-3-4	Curtin University	3004154435	Pseudomonadota	Alphaproteobacteria	Hyphomicrobiales	Phyllobacteriaceae	Mesorhizobium	Mesorhizobium sp. B2-3-4	Yes	Yes	Environmental	Terrestrial	Unclassified	Soil	Unclassified	Australia: WA, Badgingarra		6790279	6747
2868116264	Bacteria	Permanent Draft	Taxonomic study of Actinomadura sp. LMG 30035	Actinomadura fibrosa ERS3016534	Ghent University	2868116264	Actinomycetota	Actinomycetes	Streptosporangiales	Thermomonosporaceae	Actinomadura	Actinomadura fibrosa	Yes	Yes	Environmental	Terrestrial	Unclassified	Soil	Unclassified			10915467	10333
8062572089	Bacteria	Finished	Lichenihabitans sp. PAMC28606 genome sequencing	Lichenihabitans sp. PAMC28606	Korea University	8062572089	Pseudomonadota	Alphaproteobacteria	Hyphomicrobiales	Lichenihabitantaceae	Lichenihabitans	Lichenihabitans sp. PAMC28606	Yes	Yes	Environmental	Terrestrial	Unclassified	Soil	Unclassified	Uganda		4231322	4042
2546825543	Bacteria	Permanent Draft	Burkholderia Environmental Isolates	Ralstonia CL21	University of North Carolina, Chapel Hill	2546825543	Pseudomonadota	Betaproteobacteria	Burkholderiales	Burkholderiaceae	Ralstonia	Ralstonia solanacearum	No	Yes	Environmental	Terrestrial	Unclassified	Soil	Unclassified	Clayton, NC		5101256	4752
2751186031	Bacteria	Permanent Draft	Burkholderia Genome sequencing - Northern Arizona University	Burkholderia stagnalis MSMB810WGS	Northern Arizona University	2751186031	Pseudomonadota	Betaproteobacteria	Burkholderiales	Burkholderiaceae	Burkholderia	Burkholderia stagnalis	Yes	Yes	Environmental	Terrestrial	Unclassified	Soil	Unclassified	Australia: Tanami East, Northern Territory		7560863	6830
8046774930	Bacteria	Finished	Pseudomonas kurunegalensis ANKC.G2 genome sequencing	Pseudomonas kurunegalensis ANKC.G2	The Independent Schools Foundation Academy	8046774930	Pseudomonadota	Gammaproteobacteria	Pseudomonadales	Pseudomonadaceae	Pseudomonas	Pseudomonas kurunegalensis	Yes	Yes	Environmental	Terrestrial	Unclassified	Soil	Unclassified	Hong Kong: Sheung Wan	Soil	6133480	5686
2899983920	Bacteria	Permanent Draft	Nocardioides sp. GY 10127 genome sequencing	Nocardioides sp. GY 10127	Guangxi University for Nationalities	2899983920	Actinomycetota	Actinomycetes	Propionibacteriales	Nocardioidaceae	Nocardioides	Nocardioides sp. GY 10127	Yes	Yes	Environmental	Terrestrial	Unclassified	Soil	Unclassified	China: Guangxi		4408634	3998
8065833170	Bacteria	Permanent Draft	Geomonas diazotrophica Red69 genome sequencing	Geomonas diazotrophica Red69	The University of Tokyo	8065833170	Thermodesulfobacteriota	Desulfuromonadia	Geobacterales	Geobacteraceae	Geomonas	Geomonas diazotrophica	Yes	Yes	Environmental	Terrestrial	Agricultural land	Soil	Unclassified	Japan		4651047	4198
2808606828	Bacteria	Permanent Draft	Burkholderia Genome sequencing - Northern Arizona University	Burkholderia ubonensis RF32-BP4	Northern Arizona University	2808606828	Pseudomonadota	Betaproteobacteria	Burkholderiales	Burkholderiaceae	Burkholderia	Burkholderia ubonensis	Yes	Yes	Environmental	Terrestrial	Unclassified	Soil	Unclassified	Thailand: Ubon, Pibul		7715287	6923
8079423137	Bacteria	Permanent Draft	Isoptericola sp. NEAU-Y5 genome sequencing	Isoptericola sp. NEAU-Y5	Northeast Agricultural University	8079423137	Actinomycetota	Actinomycetes	Micrococcales	Promicromonosporaceae	Isoptericola	Isoptericola luteus	Yes	Yes	Environmental	Terrestrial	Unclassified	Soil	Unclassified	China: Harbin		3974819	3670
2898923055	Bacteria	Permanent Draft	Genome sequencing of Brevundimonas intermedia B-10	Brevundimonas intermedia B-10	Universidad de La Frontera	2898923055	Pseudomonadota	Alphaproteobacteria	Caulobacterales	Caulobacteraceae	Brevundimonas	Brevundimonas intermedia	Yes	Yes	Environmental	Terrestrial	Unclassified	Soil	Contaminated	Chile:Valle de Puchuncavi		3343585	3357
2920985080	Bacteria	Permanent Draft	Genome Sequencing of Mucilaginibacter sp. S1162	Mucilaginibacter sp. S1162	Chung-Ang Univiersity	2920985080	Bacteroidota	Sphingobacteriia	Sphingobacteriales	Sphingobacteriaceae	Mucilaginibacter	Mucilaginibacter humi	No	Yes	Environmental	Terrestrial	Unclassified	Soil	Unclassified	South Korea		2472934	4160
2894729216	Bacteria	Permanent Draft	Genome sequencing of Dyella sp. 4G-K06	Dyella monticola 4G-K06	Sun Yat-Sen University	2894729216	Pseudomonadota	Gammaproteobacteria	Xanthomonadales	Rhodanobacteraceae	Dyella	Dyella monticola	Yes	Yes	Environmental	Terrestrial	Temperate forest	Soil	Mineral soil	China:Guangdong Province		4940170	4466
8055207398	Bacteria	Permanent Draft	Salegentibacter sp. R32 genome sequencing	Luteimonas galliterrae SX5	Beijing Forestry University	8055207398	Pseudomonadota	Gammaproteobacteria	Xanthomonadales	Xanthomonadaceae	Luteimonas	Luteimonas galliterrae	Yes	Yes	Environmental	Terrestrial	Unclassified	Soil	Unclassified	China		3599217	3287
8048099175	Bacteria	Permanent Draft	Streptomyces type strains genome sequencing	Streptomyces rubrisoli DSM 42083	Kasetsart University	8048099175	Actinomycetota	Actinomycetes	Kitasatosporales	Streptomycetaceae	Streptantibioticus	Streptantibioticus rubrisoli	Yes	Yes	Environmental	Terrestrial		Soil				7264851	6803
2867057555	Bacteria	Finished	Streptomyces sp. CMB-StM0423 Genome sequencing	Streptomyces sp. CMB-StM0423	University of Queensland	2867057555	Actinomycetota	Actinomycetes	Kitasatosporales	Streptomycetaceae	Streptomyces	Streptomyces sp. CMB-StM0423	Yes	Yes	Environmental	Terrestrial	Sand	Soil	Unclassified	Australia: Queensland, Heron Island		8029398	6985
8056911427	Bacteria	Permanent Draft	Microbulbifer zhoushanensis TT30 genome sequencing	Microbulbifer zhoushanensis TT30	Second Institute of Oceanography, State Oceanic Administration	8056911427	Pseudomonadota	Gammaproteobacteria	Cellvibrionales	Microbulbiferaceae	Microbulbifer	Microbulbifer zhoushanensis	Yes	Yes	Environmental	Terrestrial	Unclassified	Soil	Unclassified	China: Zhoushan		4127908	3624
8083199791	Bacteria	Finished	Flavobacterium spp. genome project	Flavobacterium sp. N502536	Jeju National University	8083199791	Bacteroidota	Flavobacteriia	Flavobacteriales	Flavobacteriaceae	Flavobacterium	Flavobacterium sp. N502536	Yes	Yes	Environmental	Terrestrial	Unclassified	Soil	Unclassified	South Korea		5052333	4364
3006611656	Bacteria	Permanent Draft	Streptomyces sp. R302 genome sequencing	Streptomyces sp. R302	Kyonggi University	3006611656	Actinomycetota	Actinomycetes	Kitasatosporales	Streptomycetaceae	Streptomyces	Streptomyces sp. R302	Yes	Yes	Environmental	Terrestrial	Unclassified	Soil	Unclassified	South Korea: Suwon		7950470	7445
2868068591	Bacteria	Permanent Draft	Nocardia panacis YIM PH 21724 Genome sequencing	Nocardia panacis YIM PH 21724	Yunnan Institute of Microbiology	2868068591	Actinomycetota	Actinomycetes	Mycobacteriales	Nocardiaceae	Nocardia	Nocardia panacis	Yes	Yes	Environmental	Terrestrial	Unclassified	Soil	Unclassified	China		7362956	7064
2885830285	Bacteria	Permanent Draft	Pseudomonas sp. HS-2 genome sequencing	Pseudomonas sp. HS-2	Dalian University of Technology	2885830285	Pseudomonadota	Gammaproteobacteria	Pseudomonadales	Pseudomonadaceae	Pseudomonas	Pseudomonas sp. HS-2	Yes	Yes	Environmental	Terrestrial	Unclassified	Soil	Unclassified	China: Dalian		6368611	6347
2894393038	Bacteria	Permanent Draft	Luteimonas wenzhouensis YD-1 genome sequencing	Luteimonas wenzhouensis YD-1	Nanjing Tech Unviersity	2894393038	Pseudomonadota	Gammaproteobacteria	Xanthomonadales	Xanthomonadaceae	Luteimonas	Luteimonas wenzhouensis	Yes	Yes	Environmental	Terrestrial	Unclassified	Soil	Unclassified	China: Nanjing		3443522	3099
2923088545	Bacteria	Finished	Genome Sequencing of Bacillus sp. PAMC28571	Bacillus sp. PAMC28571	Korea University	2923088545	Bacillota	Bacilli	Bacillales	Bacillaceae	Bacillus	Bacillus sp. PAMC28571	Yes	Yes	Environmental	Terrestrial	Unclassified	Soil	Unclassified	Antarctica		3793123	3984
8047547423	Bacteria	Permanent Draft	Nocardioides nematodiphilus R-N-C8 genome sequencing	Nocardioides nematodiphilus R-N-C8	State Key Laboratory for Conservation and Utilization of Bio-Resources in Yunnan	8047547423	Actinomycetota	Actinomycetes	Propionibacteriales	Nocardioidaceae	Nocardioides	Nocardioides nematodiphilus	Yes	Yes	Environmental	Terrestrial	Unclassified	Soil	Unclassified	China: Yunnan	Soil	3790319	3697
2791354997	Bacteria	Permanent Draft	Roseomonas deserti M3 genome sequencing	Roseomonas deserti M3	Kyonggi University	2791354997	Pseudomonadota	Alphaproteobacteria	Rhodospirillales	Acetobacteraceae	Pseudoroseomonas	Pseudoroseomonas deserti	Yes	Yes	Environmental	Terrestrial	Garden	Soil	Unclassified	Kuwait		6169002	5994
2995671776	Bacteria	Permanent Draft	Pseudarthrobacter sulfonivorans ALL | Borodina E Genome sequencing	Pseudarthrobacter sulfonivorans ALL	Korea university	2995671776	Actinomycetota	Actinomycetes	Micrococcales	Micrococcaceae	Pseudarthrobacter	Pseudarthrobacter sulfonivorans	Yes	Yes	Environmental	Terrestrial	Garden	Soil	Unclassified	United Kingdom: England		4927723	4638
2554235191	Bacteria	Permanent Draft	Morganella sp. GLFB Genome sequencing	Morganella sp. GLFB	Altogen Labs	2554235191	Pseudomonadota	Gammaproteobacteria	Enterobacterales	Morganellaceae	Morganella	Morganella sp. GLFB	No	Yes	Environmental	Terrestrial	Unclassified	Soil	Oil-contaminated	USA: TX		3940310	6641
2891266078	Bacteria	Permanent Draft	Thalassotalea litorea MCCC 1K03283 genome sequencing	Thalassotalea litorea MCCC 1K03283	Institute of Applied and Environmental Microbiology	2891266078	Pseudomonadota	Gammaproteobacteria	Alteromonadales	Colwelliaceae	Thalassotalea	Thalassotalea litorea	Yes	Yes	Environmental	Terrestrial	Sand	Soil	Unclassified	South Korea: South Sea, Jeju		3884652	3510
2884173138	Bacteria	Finished	Pseudarthrobacter sp. NIBRBAC000502772 genome sequencing	Pseudarthrobacter sp. NIBRBAC000502772	Genetic Resources Bank	2884173138	Actinomycetota	Actinomycetes	Micrococcales	Micrococcaceae	Pseudarthrobacter	Pseudarthrobacter sp. NIBRBAC000502772	Yes	Yes	Environmental	Terrestrial	Unclassified	Soil	Unclassified	South Korea: Gangwon-do		4803563	4567
8058116586	Bacteria	Finished	Gordonia hongkongensis RL-LY01 genome sequencing	Gordonia hongkongensis RL-LY01	College of Coastal Agricultural Sciences	8058116586	Actinomycetota	Actinomycetes	Mycobacteriales	Gordoniaceae	Gordonia	Gordonia hongkongensis	Yes	Yes	Environmental	Terrestrial	Unclassified	Soil	Unclassified	China: Zhanjiang Bay		5175544	4740
8056444603	Bacteria	Permanent Draft	Thermomonas beijingensis RSS-23 genome sequencing	Thermomonas beijingensis RSS-23	Institute of Microbiology, Chinese Academy of Sciences	8056444603	Pseudomonadota	Gammaproteobacteria	Xanthomonadales	Xanthomonadaceae	Thermomonas	Thermomonas beijingensis	Yes	Yes	Environmental	Terrestrial	Riverside	Soil	Unclassified	China: Beijing		2785590	2682
2585427662	Bacteria	Finished	Bacillus thuringiensis serovar kurstaki str. HD-1 Genome sequencing - Huazhong Agricultural University	Bacillus thuringiensis sv. kurstaki HD-1	Huazhong Agricultural University	2585427662	Bacillota	Bacilli	Bacillales	Bacillaceae	Bacillus	Bacillus thuringiensis	Yes	Yes	Environmental	Terrestrial	Unclassified	Soil	Unclassified		Soil	6766594	6920
2987027625	Bacteria	Permanent Draft	Pyxidicoccus sp. QH1ED-7-1 genome sequencing	Pyxidicoccus sp. QH1ED-7-1	Guangdong Institute of Microbiology	2987027625	Myxococcota	Myxococcia	Myxococcales	Myxococcaceae	Pyxidicoccus	Pyxidicoccus xibeiensis	Yes	Yes	Environmental	Terrestrial	Forest	Soil	Unclassified	China: Qinghai Province	Forest soil	12698915	10000
2806310726	Bacteria	Finished	Arthrobacter crystallopoietes DSM 20117 genome sequencing	Arthrobacter crystallopoietes DSM 20117	Kyungpook National University	2806310726	Actinomycetota	Actinomycetes	Micrococcales	Micrococcaceae	Arthrobacter	Arthrobacter crystallopoietes	Yes	Yes	Environmental	Terrestrial	Unclassified	Soil	Unclassified		Soil	5032705	4717
8045806174	Bacteria	Permanent Draft	Solitalea agri MAHUQ-68 genome sequencing	Solitalea agri MAHUQ-68	Chung-Ang University	8045806174	Bacteroidota	Sphingobacteriia	Sphingobacteriales	Sphingobacteriaceae	Solitalea	Solitalea agri	Yes	Yes	Environmental	Terrestrial	Unclassified	Soil	Unclassified	South Korea	Soil	4250173	3771
2844231116	Bacteria	Permanent Draft	Neorhizobium sp. T6_25 genome sequencing	Neorhizobium sp. T6_25	CBGP	2844231116	Pseudomonadota	Alphaproteobacteria	Hyphomicrobiales	Rhizobiaceae	Neorhizobium	Neorhizobium sp. T6_25	Yes	Yes	Environmental	Terrestrial	Unclassified	Soil	Unclassified	Spain		6756482	6760
8019420162	Bacteria	Finished	Genome sequencing of BoNT-producing Clostridia and closely related bacteria	Clostridium botulinum Su0604	Northern Arizona University	8019420162	Bacillota	Clostridia	Eubacteriales	Clostridiaceae	Clostridium	Clostridium botulinum	Yes	Yes	Environmental	Terrestrial	Unclassified	Soil	Unclassified	Argentina		4378801	4425
2822641076	Bacteria	Permanent Draft	Large-scale bioinformatics analysis of Bacillus genomes	Bacillus toyonensis AFS083349	University of North Carolina, Chapel Hill	2822641076	Bacillota	Bacilli	Bacillales	Bacillaceae	Bacillus	Bacillus toyonensis	Yes	Yes	Environmental	Terrestrial	Unclassified	Soil	Unclassified	USA: North Carolina		6079255	6490
2758568004	Bacteria	Finished	Flavisolibacter sp. LCS9 Genome sequencing	Flavisolibacter tropicus LCS9	Seoul Womens University	2758568004	Bacteroidota	Chitinophagia	Chitinophagales	Chitinophagaceae	Flavisolibacter	Flavisolibacter tropicus	Yes	Yes	Environmental	Terrestrial	Loam	Soil	Unclassified	South Korea		5940863	5075
2508501006	Bacteria	Permanent Draft	Pseudomonas sp. PK	Pseudomonas sp. PK	Eureka genomics	2508501006	Pseudomonadota	Gammaproteobacteria	Pseudomonadales	Pseudomonadaceae	Pseudomonas	Pseudomonas sp. PK	Yes	Yes	Environmental	Terrestrial	Unclassified	Soil	Unclassified	Carbondale, IL	Fresh water, Soil	4648785	4442
2903462090	Bacteria	Permanent Draft	Mesorhizobia in Australia	Mesorhizobium sp. B2-4-13	Curtin University	2903462090	Pseudomonadota	Alphaproteobacteria	Hyphomicrobiales	Phyllobacteriaceae	Mesorhizobium	Mesorhizobium sp. B2-4-13	Yes	Yes	Environmental	Terrestrial	Unclassified	Soil	Unclassified	Australia: WA, Badgingarra		6230826	6165
2875367630	Bacteria	Finished	Streptomyces cadmiisoli ZFG47 genome sequencing	Streptomyces cadmiisoli ZFG47	Hunan University	2875367630	Actinomycetota	Actinomycetes	Kitasatosporales	Streptomycetaceae	Streptomyces	Streptomyces cadmiisoli	Yes	Yes	Environmental	Terrestrial	Unclassified	Soil	Unclassified	China:XiangTan		10239272	9110
2899237444	Bacteria	Permanent Draft	Lysinibacillus sp. OL1 genome sequencing	Lysinibacillus sp. OL1	UNIVERSITY OF NORTH BENGAL	2899237444	Bacillota	Bacilli	Bacillales	Bacillaceae	Lysinibacillus	Lysinibacillus sp. OL1	Yes	Yes	Environmental	Terrestrial	Unclassified	Soil	Unclassified	India: Maynaguri		4869477	5194
2808606871	Bacteria	Permanent Draft	Burkholderia Genome sequencing - Northern Arizona University	Burkholderia ubonensis MSMB1473WGS	Northern Arizona University	2808606871	Pseudomonadota	Betaproteobacteria	Burkholderiales	Burkholderiaceae	Burkholderia	Burkholderia ubonensis	Yes	Yes	Environmental	Terrestrial	Unclassified	Soil	Unclassified	Australia: Tanami East, Northern Territory		7552749	6772
2932439877	Bacteria	Finished	Screening of Streptomyces for novel antifungals	Streptomyces sp. BV410-10 v2	GATC-Biotech AG, Konstanz, Germany	2932439877	Actinomycetota	Actinomycetes	Kitasatosporales	Streptomycetaceae	Streptomyces	Streptomyces sp.	Yes	Yes	Environmental	Terrestrial	Unclassified	Soil	Unclassified	Zminjak, Serbia		7297140	6563
2936556710	Bacteria	Permanent Draft	Large-scale bioinformatics analysis of Bacillus genomes	Priestia megaterium AFS099780	University of North Carolina, Chapel Hill	2936556710	Bacillota	Bacilli	Bacillales	Bacillaceae	Priestia	Priestia megaterium	Yes	Yes	Environmental	Terrestrial	Unclassified	Soil	Unclassified	USA: Iowa		6092226	6584
2754412317	Bacteria	Permanent Draft	Burkholderia Genome sequencing - Northern Arizona University	Burkholderia stagnalis MSMB837WGS	Northern Arizona University	2754412317	Pseudomonadota	Betaproteobacteria	Burkholderiales	Burkholderiaceae	Burkholderia	Burkholderia stagnalis	Yes	Yes	Environmental	Terrestrial	Unclassified	Soil	Unclassified	Australia: Tanami East, Northern Territory		7512834	6751
8048485035	Bacteria	Finished	Eleftheria terrae P9846-PB genome sequencing	Eleftheria terrae P9846-PB	NovoBiotic Pharmaceuticals	8048485035	Pseudomonadota	Betaproteobacteria	Burkholderiales	unclassified	Eleftheria	Eleftheria terrae	Yes	Yes	Environmental	Terrestrial	Unclassified	Soil	Unclassified	USA: North Carolina	Soil	7032382	6049
2744055081	Bacteria	Permanent Draft	Draft Genomes of Chromium Resistant Microbes	Microbacterium sp. K19	Cincinnati Childrens Hospital Medical Center	2744055081	Actinomycetota	Actinomycetes	Micrococcales	Microbacteriaceae	Microbacterium	Microbacterium sp. K19	Yes	Yes	Environmental	Terrestrial	Unclassified	Soil	Contaminated	Seymore, IN		3884632	3813
2884732360	Bacteria	Permanent Draft	Hymenobacter sp. CRA2 genome sequencing	Hymenobacter sp. CRA2	Centre for Microbial Ecology and Genomics, University of Pretoria,	2884732360	Bacteroidota	Cytophagia	Cytophagales	Hymenobacteraceae	Hymenobacter	Hymenobacter sp. CRA2	Yes	Yes	Environmental	Terrestrial	Unclassified	Soil	Unclassified	South Africa		5879518	5076
2846636927	Bacteria	Permanent Draft	Mucilaginibacter conchicola MYSH2 genome sequencing	Mucilaginibacter conchicola MYSH2	Dongguk University	2846636927	Bacteroidota	Sphingobacteriia	Sphingobacteriales	Sphingobacteriaceae	Mucilaginibacter	Mucilaginibacter conchicola	Yes	Yes	Environmental	Terrestrial	Sand	Soil	Unclassified	South Korea: Yangyang		5335313	4961
8048056434	Bacteria	Permanent Draft	Nocardia rosealba NEAU-G4 genome sequencing	Nocardia rosealba NEAU-G4	Northeast Agricultural University	8048056434	Actinomycetota	Actinomycetes	Mycobacteriales	Nocardiaceae	Nocardia	Nocardia rosealba	Yes	Yes	Environmental	Terrestrial	Unclassified	Soil	Unclassified	China: Neimenggu	Soil	6405167	6000
2967460032	Bacteria	Permanent Draft	Bacillus sp. F17-54	Bacillus sp. F17-54	Microbial Genome Sequencing Center (MiGS)	2967460032	Bacillota	Bacilli	Bacillales	Bacillaceae	Bacillus	unclassified	Yes	Yes	Environmental	Terrestrial	Unclassified	Soil	Unclassified	USA: Bowling Green, OH		3585807	3467
2822807559	Bacteria	Permanent Draft	Large-scale bioinformatics analysis of Bacillus genomes	Bacillus toyonensis AFS044250	University of North Carolina, Chapel Hill	2822807559	Bacillota	Bacilli	Bacillales	Bacillaceae	Bacillus	Bacillus toyonensis	Yes	Yes	Environmental	Terrestrial	Unclassified	Soil	Unclassified	USA: North Carolina		5485531	6244
2534681955	Bacteria	Permanent Draft	Broad Institute - Bacillus cereus sequencing	Bacillus cereus ISP2954	Broad Institute	2534681955	Bacillota	Bacilli	Bacillales	Bacillaceae	Bacillus	Bacillus cereus	Yes	Yes	Environmental	Terrestrial	Unclassified	Soil	Unclassified	Belgium	Food, Wheat	6646514	6960
2922465951	Bacteria	Permanent Draft	Genome sequencing of Sphingomonas desiccabilis CP1D	Sphingomonas desiccabilis CP1D	Huazhong Agricultural University (HZAU)	2922465951	Pseudomonadota	Alphaproteobacteria	Sphingomonadales	Sphingomonadaceae	Sphingomonas	Sphingomonas desiccabilis	Yes	Yes	Environmental	Terrestrial	Unclassified	Soil	Unclassified	USA: Colorado Plateau		3607011	3437
2912861033	Bacteria	Finished	Bacillus safensis BRM1 Genome sequencing	Bacillus safensis BRM1	Federal University of Parana	2912861033	Bacillota	Bacilli	Bacillales	Bacillaceae	Bacillus	Bacillus safensis	Yes	Yes	Environmental	Terrestrial	Unclassified	Soil	Unclassified	Brazil: Paranagua		3740842	3989
8001690566	Bacteria	Permanent Draft	Pseudomonas sp. D-134-1 genome sequencing	Stutzerimonas degradans D-134-1	Kyonggi University	8001690566	Pseudomonadota	Gammaproteobacteria	Pseudomonadales	Pseudomonadaceae	Stutzerimonas	Stutzerimonas degradans	Yes	Yes	Environmental	Terrestrial	Unclassified	Soil	Unclassified	South Korea		3881662	3787
2711768626	Bacteria	Finished	Hymenobacter sp. DG25B	Hymenobacter sp. DG25B	Macrogen	2711768626	Bacteroidota	Cytophagia	Cytophagales	Hymenobacteraceae	Hymenobacter	Hymenobacter sp. DG25B	Yes	Yes	Environmental	Terrestrial	Unclassified	Soil	Unclassified	South Korea		4360029	3202
2519103072	Bacteria	Permanent Draft	Broad Institute - Bacillus cereus sequencing	Bacillus cereus BAG2X1-3	Broad Institute	2519103072	Bacillota	Bacilli	Bacillales	Bacillaceae	Bacillus	Bacillus cereus	Yes	Yes	Environmental	Terrestrial	Unclassified	Soil	Unclassified	USA: Boston, Massacusetts	Soil	5191991	5451
2823408088	Bacteria	Finished	Genome sequencing of Rhodococcus pyridinivorans GF3	Rhodococcus pyridinivorans GF3	Dalian university of technology	2823408088	Actinomycetota	Actinomycetes	Mycobacteriales	Nocardiaceae	Rhodococcus	Rhodococcus pyridinivorans	Yes	Yes	Environmental	Terrestrial	Unclassified	Soil	Unclassified	China: Zhejiang		5303895	5100
8081794031	Bacteria	Permanent Draft	Glycomyces sp. L485 genome sequencing	Glycomyces sp. L485	Institute of Medical Biotechnology, Beijing	8081794031	Actinomycetota	Actinomycetes	Glycomycetales	Glycomycetaceae	Glycomyces	Glycomyces sp. L485	Yes	Yes	Environmental	Terrestrial	Unclassified	Soil	Unclassified	Russia		4418156	4192
8047015191	Bacteria	Permanent Draft	Pseudanabaena catenata USMAC16 genome sequencing	Pseudanabaena catenata USMAC16	University of Science, Malaysia	8047015191	Cyanobacteriota	Cyanophyceae	Pseudanabaenales	Pseudanabaenaceae	Pseudanabaena	Pseudanabaena catenata	Yes	Yes	Environmental	Terrestrial	Unclassified	Soil	Unclassified	Norway: Svalbard Archipelago	Soil	5475901	5230
8033953343	Bacteria	Permanent Draft	ISURF NH-INBRE 2018 Genome Sequencing	Bacillus sp. LB(2018)	Colby Sawyer College	8033953343	Bacillota	Bacilli	Bacillales	Bacillaceae	Bacillus	Bacillus sp. LB(2018)	Yes	Yes	Environmental	Terrestrial	Unclassified	Soil	Unclassified	USA: New Hampshire, Town of Hanover, Hanover Country Club golf course		5729898	6127
2925590669	Bacteria	Finished	Bacillus sp. JAS24-2 genome sequencing	Bacillus sp. JAS24-2	University of Bialystok	2925590669	Bacillota	Bacilli	Bacillales	Bacillaceae	Bacillus	Bacillus sp. JAS24-2	Yes	Yes	Environmental	Terrestrial	Unclassified	Soil	Unclassified	Poland: Jasienowka, farmland		6129653	6385
2816332666	Bacteria	Permanent Draft	Picher, OK, Soil Microbes	Methylobacterium sp. EM01	The Sequencing Center (Fort Collins)	2816332666	Pseudomonadota	Alphaproteobacteria	Hyphomicrobiales	Methylobacteriaceae	Methylobacterium	unclassified	Yes	Yes	Environmental	Terrestrial	Unclassified	Soil	Unclassified			5859422	5624
8056502925	Bacteria	Finished	Novosphingobium humi KACC 19094 genome sequencing	Novosphingobium humi KACC 19094	National Institute of Agricultural Sciences, Rural Development Administration (RDA), South Korea	8056502925	Pseudomonadota	Alphaproteobacteria	Sphingomonadales	Sphingomonadaceae	Novosphingobium	Novosphingobium humi	Yes	Yes	Environmental	Terrestrial	Unclassified	Soil	Unclassified	South Korea: Jeollanam-do, Jangseong-gun		4890578	4492
8078419736	Bacteria	Permanent Draft	Crossiella sp. SN42 genome sequencing	Crossiella sp. SN42	Ondokuz Mayis University	8078419736	Actinomycetota	Actinomycetes	Pseudonocardiales	Pseudonocardiaceae	Crossiella	Crossiella sp. SN42	Yes	Yes	Environmental	Terrestrial	Unclassified	Soil	Unclassified	Turkey: Bayburt		9719922	8980
2984437700	Bacteria	Draft	Genomes isolated from dry permafrost	Arthrobacter agilis Ant-EH-1	University of Guelph	2984437700	Actinomycetota	Actinomycetes	Micrococcales	Micrococcaceae	Arthrobacter	Arthrobacter agilis	No	Yes	Environmental	Terrestrial	Desert	Soil	Dry permafrost	Antarctica: Elephants Head		3764186	6015
8050226395	Bacteria	Permanent Draft	Burkholderia Genome sequencing - Northern Arizona University	Burkholderia cepacia MSMB1055WGS	Northern Arizona University	8050226395	Pseudomonadota	Betaproteobacteria	Burkholderiales	Burkholderiaceae	Burkholderia	Burkholderia cepacia	Yes	Yes	Environmental	Terrestrial	Unclassified	Soil	Unclassified	Australia: Tanami East, Northern Territory		8412156	7831
2690315950	Bacteria	Finished	Anoxybacillus amylolyticus DSM 15939 T genome sequencing and assembly	Anoxybacillus amylolyticus DSM 15939	Los Alamos National Laboratory	2690315950	Bacillota	Bacilli	Bacillales	Bacillaceae	Anoxybacillus	Anoxybacillus amylolyticus	Yes	Yes	Environmental	Terrestrial	Unclassified	Soil	Unclassified	Antarctica	Soil	3158269	3376
3002409482	Bacteria	Permanent Draft	3 species belong to genus Rhodanobacter Genome sequencing and assembly	Rhodanobacter sp. 7MK24	Sun Yat-Sen University	3002409482	Pseudomonadota	Gammaproteobacteria	Xanthomonadales	Rhodanobacteraceae	Rhodanobacter	Rhodanobacter sp. 7MK24	Yes	Yes	Environmental	Terrestrial	Unclassified	Soil	Unclassified	China: Guangdong		4152020	3761
2808606815	Bacteria	Finished	Sphingobium herbicidovorans MH Genome sequencing	Sphingobium herbicidovorans NBRC 16415	Aarhus University	2808606815	Pseudomonadota	Alphaproteobacteria	Sphingomonadales	Sphingomonadaceae	Sphingobium	Sphingobium herbicidovorans	Yes	Yes	Environmental	Terrestrial	Unclassified	Soil	Unclassified		Soil	4240798	4221
2773857793	Bacteria	Finished	Deinococcus puniceus strain:DY1 Genome sequencing	Deinococcus puniceus DY1	Seoul Womens University	2773857793	Deinococcota	Deinococci	Deinococcales	Deinococcaceae	Deinococcus	Deinococcus puniceus	Yes	Yes	Environmental	Terrestrial	Loam	Soil	Forest soil	Deogyusan, South Korea		2971983	2817
8061319966	Bacteria	Permanent Draft	Large-scale bioinformatics analysis of Bacillus genomes	Bacillus thuringiensis AFS059559	University of North Carolina, Chapel Hill	8061319966	Bacillota	Bacilli	Bacillales	Bacillaceae	Bacillus	Bacillus thuringiensis	Yes	Yes	Environmental	Terrestrial	Unclassified	Soil	Unclassified	USA: North Carolina		5660043	5931
2775507095	Bacteria	Permanent Draft	Streptomyces yokosukanensis DSM 40224 genome sequencing and assembly	Streptomyces yokosukanensis DSM 40224	Bielefeld University	2775507095	Actinomycetota	Actinomycetes	Kitasatosporales	Streptomycetaceae	Streptomyces	Streptomyces yokosukanensis	Yes	Yes	Environmental	Terrestrial	Unclassified	Soil	Unclassified	Japan: Yokosuka City		10084366	9133
8047163983	Bacteria	Finished	Streptomyces cinnabarinus DSM 40467 genome sequencing	Streptomyces cinnabarinus DSM 40467	Bielefeld University	8047163983	Actinomycetota	Actinomycetes	Kitasatosporales	Streptomycetaceae	Streptomyces	Streptomyces cinnabarinus	Yes	Yes	Environmental	Terrestrial	Unclassified	Soil	Unclassified		Soil	9621721	8758
2886653463	Bacteria	Permanent Draft	Bacteria Genome sequencing	Acidisoma sp. L85	Institute of Microbiology of the AS CR	2886653463	Pseudomonadota	Alphaproteobacteria	Rhodospirillales	Acetobacteraceae	Acidisoma	Acidisoma sp. L85	Yes	Yes	Environmental	Terrestrial	Unclassified	Soil	Unclassified	Czech Republic		6376414	6328
2938002229	Bacteria	Permanent Draft	Mesorhizobia in Australia	Mesorhizobium sp. B3-1-6	Curtin University	2938002229	Pseudomonadota	Alphaproteobacteria	Hyphomicrobiales	Phyllobacteriaceae	Mesorhizobium	Mesorhizobium sp. B3-1-6	Yes	Yes	Environmental	Terrestrial	Unclassified	Soil	Unclassified	Australia: WA, Badgingarra		6359818	6309
2808606923	Bacteria	Permanent Draft	Burkholderia Genome sequencing - Northern Arizona University	Burkholderia ubonensis MSMB2163WGS	Northern Arizona University	2808606923	Pseudomonadota	Betaproteobacteria	Burkholderiales	Burkholderiaceae	Burkholderia	Burkholderia ubonensis	Yes	Yes	Environmental	Terrestrial	Unclassified	Soil	Unclassified	Australia: Tanami East, Northern Territory		7702852	6968
2970561965	Bacteria	Permanent Draft	Mesorhizobia in Australia	Mesorhizobium sp. B2-4-3	Curtin University	2970561965	Pseudomonadota	Alphaproteobacteria	Hyphomicrobiales	Phyllobacteriaceae	Mesorhizobium	Mesorhizobium sp. B2-4-3	Yes	Yes	Environmental	Terrestrial	Unclassified	Soil	Unclassified	Australia: WA, Badgingarra		6206311	6097
2751186015	Bacteria	Permanent Draft	Burkholderia Genome sequencing - Northern Arizona University	Burkholderia sp. RF4-BP95	Northern Arizona University	2751186015	Pseudomonadota	Betaproteobacteria	Burkholderiales	Burkholderiaceae	Burkholderia	Burkholderia sp. RF4-BP95	Yes	Yes	Environmental	Terrestrial	Unclassified	Soil	Unclassified	Thailand: Ubon, Trakam		7408241	6727
2994481061	Bacteria	Permanent Draft	Heliobacterium mobile DSM 6151	Heliobacterium mobile DSM 6151	Bellevue University	2994481061	Bacillota	Clostridia	Eubacteriales	Heliobacteriaceae	Heliobacterium	Heliobacterium mobile	Yes	Yes	Environmental	Terrestrial	Unclassified	Soil	Agricultural land		Soil	4116862	4312
2609459771	Bacteria	Permanent Draft	Alkalihalobacillus hemicellulosilyticus JCM 9152	Alkalihalobacillus hemicellulosilyticus JCM 9152	University of Tokyo	2609459771	Bacillota	Bacilli	Bacillales	Bacillaceae	Halalkalibacter	Halalkalibacter hemicellulosilyticus	Yes	Yes	Environmental	Terrestrial	Unclassified	Soil	Unclassified	Saitama, Japan	Soil	4538064	4580
8046968153	Bacteria	Permanent Draft	Streptomyces type strains genome sequencing	Streptantibioticus ferralitis JCM 14344	Kasetsart University	8046968153	Actinomycetota	Actinomycetes	Kitasatosporales	Streptomycetaceae	Streptantibioticus	Streptantibioticus ferralitis	Yes	Yes	Environmental	Terrestrial	Unclassified	Soil	Unclassified	New Caledonia		8795397	8259
2775507200	Bacteria	Finished	Pseudomonas sp. AK6U genome sequencing	Pseudomonas sp. AK6U	King Abdulaziz City for Science and Technology (KACST)	2775507200	Pseudomonadota	Gammaproteobacteria	Pseudomonadales	Pseudomonadaceae	Pseudomonas	Pseudomonas sp. AK6U	Yes	Yes	Environmental	Terrestrial	Garden	Soil	Unclassified	Kuwait: Fahaheel		6909530	6541
2899771278	Bacteria	Permanent Draft	Genome sequencing of Cupriavidus pauculus UM1	Cupriavidus pauculus UM1	Loyola University Chicago	2899771278	Pseudomonadota	Betaproteobacteria	Burkholderiales	Burkholderiaceae	Cupriavidus	Cupriavidus pauculus	Yes	Yes	Environmental	Terrestrial	Unclassified	Soil	Unclassified	USA: Hadley, MA		7402815	6895
2767802276	Bacteria	Permanent Draft	Analysing Pseudmonas diversity in wheat fields in United Kingdom	Pseudomonas sp. 34 E 7	JOHN INNES CENTRE, NORWICH, UK.	2767802276	Pseudomonadota	Gammaproteobacteria	Pseudomonadales	Pseudomonadaceae	Pseudomonas	Pseudomonas sp. 34 E 7	Yes	Yes	Environmental	Terrestrial	Unclassified	Soil	Unclassified			6336811	5900
8039014152	Bacteria	Permanent Draft	Burkholderia Genome sequencing - Northern Arizona University	Burkholderia cepacia MSMB1213WGS	Northern Arizona University	8039014152	Pseudomonadota	Betaproteobacteria	Burkholderiales	Burkholderiaceae	Burkholderia	Burkholderia cepacia	Yes	Yes	Environmental	Terrestrial	Unclassified	Soil	Unclassified	Australia: Tanami East, Northern Territory		8414988	7863
2887046766	Bacteria	Permanent Draft	Rubrivivax benzoatilyticus JA2-Glc genome sequencing	Rubrivivax benzoatilyticus JA2-Glc	Jawaharlal Nehru Technological University Hyderabad (JNTUH)	2887046766	Pseudomonadota	Betaproteobacteria	Burkholderiales	Sphaerotilaceae	Rubrivivax	Rubrivivax benzoatilyticus	Yes	Yes	Environmental	Terrestrial	Unclassified	Soil	Unclassified	India: Elluru		4148492	3891
2862421350	Bacteria	Permanent Draft	Biogeography of Streptomyces	Streptomyces sp. rh34	Cornell University	2862421350	Actinomycetota	Actinomycetes	Kitasatosporales	Streptomycetaceae	Streptomyces	Streptomyces sp. rh34	Yes	Yes	Environmental	Terrestrial	Unclassified	Soil	Unclassified	USA: WIsconsin		8221365	7895
2885747374	Bacteria	Permanent Draft	Vibrio sp. 11986-1-5 genome sequencing	Vibrio sp. 11986-1-5	University of Bath	2885747374	Pseudomonadota	Gammaproteobacteria	Vibrionales	Vibrionaceae	Vibrio	Vibrio sp. 11986-1-5	Yes	Yes	Environmental	Terrestrial	Sand	Soil	Unclassified	United Kingdom		3663966	3417
2838843591	Bacteria	Permanent Draft	Nonomuraea lactucae NEAU-YG30 genome sequencing	Nonomuraea lactucae NEAU-YG30	Northeast Agricultural University	2838843591	Actinomycetota	Actinomycetes	Streptosporangiales	Streptosporangiaceae	Nonomuraea	Nonomuraea lactucae	Yes	Yes	Environmental	Terrestrial	Unclassified	Soil	Unclassified	China: Harbin		8673472	9200
2958516082	Bacteria	Permanent Draft	Flavobacterium humi DS2-A genome sequencing	Flavobacterium humi DS2-A	Dongguk University	2958516082	Bacteroidota	Flavobacteriia	Flavobacteriales	Flavobacteriaceae	Flavobacterium	Flavobacterium humi	Yes	Yes	Environmental	Terrestrial	Unclassified	Soil	Unclassified	South Korea		3563867	3291
8078641785	Bacteria	Permanent Draft	Streptomyces sp. NEAU-Y11 genome sequencing	Streptomyces sp. NEAU-Y11	Northeast Agricultural University	8078641785	Actinomycetota	Actinomycetes	Kitasatosporales	Streptomycetaceae	Streptomyces	Streptomyces sp. NEAU-Y11	Yes	Yes	Environmental	Terrestrial	Unclassified	Soil	Unclassified	China: Guangzhou		9521471	8578
2630968459	Bacteria	Permanent Draft	Genome sequencing of Lysinibacillus strains	Ureibacillus manganicus DSM 26584	Huazhong Agricultural University	2630968459	Bacillota	Bacilli	Bacillales	Planococcaceae	Ureibacillus	Ureibacillus manganicus	Yes	Yes	Environmental	Terrestrial	Unclassified	Soil	Unclassified			4047197	4004
2889408400	Bacteria	Permanent Draft	Serratia oryzae J11-6 genome sequencing	Chitiniphilus eburneus HX-2-15	Nanjing Agricultural University	2889408400	Pseudomonadota	Betaproteobacteria	Neisseriales	Chitinibacteraceae	Chitiniphilus	Chitiniphilus eburneus	Yes	Yes	Environmental	Terrestrial	Unclassified	Soil	Unclassified	China: Nanjing		4337935	4121
2916853388	Bacteria	Permanent Draft	Genome sequencing of Bacillus patagoniensis DSM 16117	Alkalihalobacillus patagoniensis DSM 16117	Fujian Academy of Agricultural Sciences	2916853388	Bacillota	Bacilli	Bacillales	Bacillaceae	Shouchella	Shouchella patagoniensis	Yes	Yes	Environmental	Terrestrial	Unclassified	Soil	Unclassified	Argentina, north-eastern Patagonia		4646905	5081
2906712872	Bacteria	Permanent Draft	Sphingomonas sp. G-3-2-10 genome sequencing	Sphingomonas sp. G-3-2-10	Kyonggi University	2906712872	Pseudomonadota	Alphaproteobacteria	Sphingomonadales	Sphingomonadaceae	Sphingomonas	Sphingomonas sp. G-3-2-10	Yes	Yes	Environmental	Terrestrial	Unclassified	Soil	Unclassified	South Korea: Suwon		4480713	4514
2891532459	Bacteria	Permanent Draft	Microbispora sp. KK1-11 genome sequencing	Microbispora sp. KK1-11	King Mongkuts University of Technology Thonburi	2891532459	Actinomycetota	Actinomycetes	Streptosporangiales	Streptosporangiaceae	Microbispora	Microbispora sp. KK1-11	Yes	Yes	Environmental	Terrestrial	Unclassified	Soil	Unclassified	Thailand: Ubon ratchathani		9295408	8895
2908287102	Bacteria	Finished	Streptomyces olivochromogenes Genome sequencing	Streptomyces sp. RLB3-17	Universite de Lorraine	2908287102	Actinomycetota	Actinomycetes	Kitasatosporales	Streptomycetaceae	Streptomyces	Streptomyces sp. RLB3-17	Yes	Yes	Environmental	Terrestrial	Unclassified	Soil	Unclassified	France: Montiers		12022941	11262
2915584708	Bacteria	Finished	Genome Sequencing of Brevibacillus sp. DP1.3A	Brevibacillus sp. DP1.3A	Nord Reet UG, Greifswald, Germany	2915584708	Bacillota	Bacilli	Bacillales	Paenibacillaceae	Brevibacillus	Brevibacillus sp. DP1.3A	Yes	Yes	Environmental	Terrestrial	Unclassified	Soil	Agricultural land	Viet Nam: Dan Phong, Ha Noi		6579985	6358
2891621223	Bacteria	Permanent Draft	Genome sequencing of Meiothermus sp. Pnk-1	Meiothermus sp. Pnk-1	Genome Consortium for Active Teaching (GCAT), Lycoming College	2891621223	Deinococcota	Deinococci	Thermales	Thermaceae	Meiothermus	Meiothermus sp. Pnk-1	Yes	Yes	Environmental	Terrestrial	Unclassified	Soil	Unclassified	USA: Centralia		3511473	3604
2576861490	Bacteria	Permanent Draft	Geobacillus caldoxylosilyticus NBRC 107762	Parageobacillus caldoxylosilyticus NBRC 107762	National Institute of Technology and Evaluation	2576861490	Bacillota	Bacilli	Bacillales	Bacillaceae	Parageobacillus	Parageobacillus caldoxylosilyticus	Yes	Yes	Environmental	Terrestrial	Unclassified	Soil	Unclassified	Melbourne	Soil	3798752	3896
2826732875	Bacteria	Permanent Draft	Large-scale bioinformatics analysis of Bacillus genomes	Bacillus pseudomycoides AFS098856	University of North Carolina, Chapel Hill	2826732875	Bacillota	Bacilli	Bacillales	Bacillaceae	Bacillus	Bacillus pseudomycoides	Yes	Yes	Environmental	Terrestrial	Unclassified	Soil	Unclassified	USA: New York		5813926	6299
2911001832	Bacteria	Finished	Genome Sequencing of Winogradskyella sp. PAMC22761	Winogradskyella sp. PAMC22761	Korea University	2911001832	Bacteroidota	Flavobacteriia	Flavobacteriales	Flavobacteriaceae	Winogradskyella	Winogradskyella sp. PAMC22761	Yes	Yes	Environmental	Terrestrial	Unclassified	Soil	Unclassified	Antarctica		3566174	3211
645058855	Bacteria	Permanent Draft	Streptomyces viridochromogenes DSM 40736	Streptomyces viridochromogenes DSM 40736	Broad Institute	645058855	Actinomycetota	Actinomycetes	Kitasatosporales	Streptomycetaceae	Streptomyces	Streptomyces viridochromogenes	Yes	Yes	Environmental	Terrestrial	Unclassified	Soil	Unclassified		Soil	8548109	7831
8046744982	Bacteria	Permanent Draft	Paenibacillus chinjuensis UW52 genome sequencing	Paenibacillus chinjuensis UW52	Sangji University	8046744982	Bacillota	Bacilli	Bacillales	Paenibacillaceae	Paenibacillus	Paenibacillus chinjuensis	Yes	Yes	Environmental	Terrestrial	Unclassified	Soil	Unclassified	South Korea	Soil	7436003	6875
3005665380	Bacteria	Permanent Draft	Genome sequencing of free-living Bradyrhizobium	Bradyrhizobium liaoningense SZCCT0399	The Chinese University of Hong Kong	3005665380	Pseudomonadota	Alphaproteobacteria	Hyphomicrobiales	Nitrobacteraceae	Bradyrhizobium	Bradyrhizobium liaoningense	Yes	Yes	Environmental	Terrestrial	Unclassified	Soil	Unclassified	China: Shenzhen, Guangdong		8301925	8013
2903131571	Bacteria	Permanent Draft	Chryseobacterium antibioticum RP-3-3 genome sequencing	Chryseobacterium antibioticum RP-3-3	Kyonggi University	2903131571	Bacteroidota	Flavobacteriia	Flavobacteriales	Weeksellaceae	Chryseobacterium	Chryseobacterium antibioticum	Yes	Yes	Environmental	Terrestrial	Unclassified	Soil	Unclassified	Canada: Cambridge Bay, NU		4910468	4667
2718217838	Bacteria	Finished	Gluconobacter oxydans 1.637 genome	Gluconobacter oxydans 1.637	Beijing Genomics Institute (BGI), Beijing Institute of Biotechnology	2718217838	Pseudomonadota	Alphaproteobacteria	Rhodospirillales	Acetobacteraceae	Gluconobacter	Gluconobacter oxydans	Yes	Yes	Environmental	Terrestrial	Unclassified	Soil	Unclassified			3606417	3394
2882815965	Bacteria	Permanent Draft	Paraburkholderia sp. LD6 genome sequencing	Paraburkholderia sp. LD6	Kyonggi University	2882815965	Pseudomonadota	Betaproteobacteria	Burkholderiales	Burkholderiaceae	Paraburkholderia	Paraburkholderia flava	Yes	Yes	Environmental	Terrestrial	Unclassified	Soil	Unclassified	South Korea		6970102	6385
8047311272	Bacteria	Permanent Draft	Genomes of Acidobacteriaceae species	Granulicella arctica DSM 23128	Sun Yat-Sen University	8047311272	Acidobacteriota	Terriglobia	Terriglobales	Acidobacteriaceae	Granulicella	Granulicella arctica	Yes	Yes	Environmental	Terrestrial	Unclassified	Soil	Unclassified			5850469	5253
8050737276	Bacteria	Permanent Draft	Burkholderia Genome sequencing - Northern Arizona University	Burkholderia ubonensis MSMB1808WGS	Northern Arizona University	8050737276	Pseudomonadota	Betaproteobacteria	Burkholderiales	Burkholderiaceae	Burkholderia	Burkholderia ubonensis	Yes	Yes	Environmental	Terrestrial	Unclassified	Soil	Unclassified	Australia: Tanami East, Northern Territory		8298011	7942
8048784512	Bacteria	Permanent Draft	Nannocystis pusilla Na p29 genome sequencing	Nannocystis pusilla Na p29	University of Mississippi	8048784512	Myxococcota	unclassified	Nannocystales	Nannocystaceae	Nannocystis	Nannocystis pusilla	Yes	Yes	Environmental	Terrestrial	Unclassified	Soil	Unclassified		Soil	11987768	11144
2831531816	Bacteria	Permanent Draft	Aerophototrophica crusticola MIMtkB3 genome sequencing	Aerophototrophica crusticola MIMtkB3	Inner Mongolia Agricultural University	2831531816	Pseudomonadota	Alphaproteobacteria	Rhodospirillales	Rhodospirillaceae	Aerophototrophica	Aerophototrophica crusticola	Yes	Yes	Environmental	Terrestrial	Garden	Soil	Unclassified	China: Inner Mongolia Erdos		6065421	5819
8084801733	Bacteria	Permanent Draft	Paenibacillus sp. YIM B05602 genome sequencing	Paenibacillus sp. YIM B05602	Yunnan Institute of Microbiology	8084801733	Bacillota	Bacilli	Bacillales	Paenibacillaceae	Paenibacillus	Paenibacillus thermotolerans	Yes	Yes	Environmental	Terrestrial	Unclassified	Soil	Unclassified	China		5512032	5460
2856758937	Bacteria	Permanent Draft	Streptacidiphilus pinicola MMS16-CNU450 genome sequencing	Streptacidiphilus pinicola MMS16-CNU450	Ministry of Food and Drug Safety	2856758937	Actinomycetota	Actinomycetes	Kitasatosporales	Streptomycetaceae	Streptacidiphilus	Streptacidiphilus pinicola	Yes	Yes	Environmental	Terrestrial	Garden	Soil	Unclassified	South Korea		8432874	7999
2648501297	Bacteria	Finished	Complete Genome sequencing and assembly of Yersinia strains for phylogenetic analysis and development of detection assays	Yersinia pestis Antiqua	Los Alamos National Laboratory	2648501297	Pseudomonadota	Gammaproteobacteria	Enterobacterales	Yersiniaceae	Yersinia	Yersinia pestis	Yes	Yes	Environmental	Terrestrial	Unclassified	Soil	Unclassified	Soil sample from the Republic of Congo	Host, Soil	4884396	4586
2808606916	Bacteria	Permanent Draft	Burkholderia Genome sequencing - Northern Arizona University	Burkholderia ubonensis MSMB1806WGS	Northern Arizona University	2808606916	Pseudomonadota	Betaproteobacteria	Burkholderiales	Burkholderiaceae	Burkholderia	Burkholderia ubonensis	Yes	Yes	Environmental	Terrestrial	Unclassified	Soil	Unclassified	Australia: Tanami East, Northern Territory		7150287	6436
2848038860	Bacteria	Finished	Paenibacillus lentus DSM 25539 genome sequencing	Paenibacillus lentus DSM 25539	Korean Collection for Oral Microbiology	2848038860	Bacillota	Bacilli	Bacillales	Paenibacillaceae	Paenibacillus	Paenibacillus lentus	Yes	Yes	Environmental	Terrestrial	Garden	Soil	Unclassified	USA: South American countries		5288676	4955
2609459807	Bacteria	Permanent Draft	Alkalihalobacillus wakoensis JCM 9140	Alkalihalobacillus wakoensis JCM 9140	University of Tokyo	2609459807	Bacillota	Bacilli	Bacillales	Bacillaceae	Halalkalibacter	Halalkalibacter wakoensis	Yes	Yes	Environmental	Terrestrial	Unclassified	Soil	Unclassified	Japan, Saitama	Soil	4530938	4890
8064514227	Bacteria	Permanent Draft	Genome sequencing to further insight into bacterial adaptation of environment and study on the phylogeny of them	Rubellimicrobium sp. SYSU D00286	Sun Yat-Sen University	8064514227	Pseudomonadota	Alphaproteobacteria	Rhodobacterales	Roseobacteraceae	Rubellimicrobium	Rubellimicrobium arenae	Yes	Yes	Environmental	Terrestrial	Desert	Soil	Unclassified	China: Xinjiang		4556822	4347
2551306334	Bacteria	Permanent Draft	Comparative genomic analysis of Acinetobacter genomes - Translational Genomics Research Institute, Phoenix, AZ	Acinetobacter calcoaceticus TG19585	TGen	2551306334	Pseudomonadota	Gammaproteobacteria	Moraxellales	Moraxellaceae	Acinetobacter	Acinetobacter calcoaceticus	Yes	Yes	Environmental	Terrestrial	Unclassified	Soil	Unclassified			3810905	3677
2556793010	Bacteria	Permanent Draft	Acidobacteria bacterium AB23	Acidobacteria bacterium AB23	Genomica DF	2556793010	Acidobacteriota	unclassified	unclassified	unclassified	unclassified	Acidobacteria bacterium AB23	No	Yes	Environmental	Terrestrial	Unclassified	Soil	Unclassified			6278575	5429
2993254755	Bacteria	Permanent Draft	Environmental Pseudomonas strains	Pseudomonas sp. TE50-2	Microbial Genome Sequencing Center (MiGS)	2993254755	Pseudomonadota	Gammaproteobacteria	Pseudomonadales	Pseudomonadaceae	Pseudomonas	unclassified	Yes	Yes	Environmental	Terrestrial	Unclassified	Soil	Unclassified	USA: Curtice, Ohio		5928132	5509
2939889013	Bacteria	Finished	Genome sequencing of Bacillus velezensis JJ47	Bacillus velezensis JJ47		2939889013	Bacillota	Bacilli	Bacillales	Bacillaceae	Bacillus	Bacillus velezensis	Yes	Yes	Environmental	Terrestrial	Unclassified	Soil	Unclassified			3929792	3957
2740892511	Bacteria	Permanent Draft	Genome sequencing of cellulolytic bacteria in forest soil	Mucilaginibacter sp. L294	Institute of Microbiology of the ASCR, v. v. i.	2740892511	Bacteroidota	Sphingobacteriia	Sphingobacteriales	Sphingobacteriaceae	Mucilaginibacter	Mucilaginibacter sp. L294	Yes	Yes	Environmental	Terrestrial	Forest	Soil	Unclassified	Czech Republic: Prague		5211148	4733
2883440999	Bacteria	Finished	Luteolibacter luteus G-1-1-1 genome sequencing	Luteolibacter luteus G-1-1-1	Kyonggi University	2883440999	Verrucomicrobiota	Verrucomicrobiae	Verrucomicrobiales	Verrucomicrobiaceae	Luteolibacter	Luteolibacter luteus	Yes	Yes	Environmental	Terrestrial	Unclassified	Soil	Unclassified	South Korea: Suwon		6412079	5420
2965083062	Bacteria	Permanent Draft	Mesorhizobia in Australia	Mesorhizobium sp. B2-1-5	Curtin University	2965083062	Pseudomonadota	Alphaproteobacteria	Hyphomicrobiales	Phyllobacteriaceae	Mesorhizobium	Mesorhizobium sp. B2-1-5	Yes	Yes	Environmental	Terrestrial	Unclassified	Soil	Unclassified	Australia: WA, Badgingarra		6283186	6224
2958853788	Bacteria	Permanent Draft	Sequencing as part of the GlobE Evolution project	Leptospira bourretii 201800266	INRS - Institute Armand Frappier	2958853788	Spirochaetota	Spirochaetia	Leptospirales	Leptospiraceae	Leptospira	Leptospira bourretii	Yes	Yes	Environmental	Terrestrial	Unclassified	Soil	Unclassified	New Caledonia		4222697	4184
2902615391	Bacteria	Permanent Draft	Micromonospora sp. Rc5 genome sequencing	Micromonospora sp. Rc5	Ainshams University	2902615391	Actinomycetota	Actinomycetes	Micromonosporales	Micromonosporaceae	Micromonospora	Micromonospora sp. Rc5	Yes	Yes	Environmental	Terrestrial	Unclassified	Soil	Unclassified	Egypt: Sinai		7720860	7071
2772190770	Bacteria	Permanent Draft	Burkholderia Genome sequencing - Northern Arizona University	Burkholderia seminalis FL-5-5-10-S1-D0	Northern Arizona University	2772190770	Pseudomonadota	Betaproteobacteria	Burkholderiales	Burkholderiaceae	Burkholderia	Burkholderia seminalis	Yes	Yes	Environmental	Terrestrial	Unclassified	Soil	Unclassified	USA: Florida		7543898	6844
2808606866	Bacteria	Permanent Draft	Burkholderia Genome sequencing - Northern Arizona University	Burkholderia ubonensis MSMB1758	Northern Arizona University	2808606866	Pseudomonadota	Betaproteobacteria	Burkholderiales	Burkholderiaceae	Burkholderia	Burkholderia ubonensis	Yes	Yes	Environmental	Terrestrial	Unclassified	Soil	Unclassified			7348648	6580
2885086533	Bacteria	Permanent Draft	Ochrobactrum sp. 3-3 genome sequencing	Ochrobactrum sp. 3-3	Nanjing Agricultural University	2885086533	Pseudomonadota	Alphaproteobacteria	Hyphomicrobiales	Brucellaceae	Ochrobactrum	Ochrobactrum sp. 3-3	Yes	Yes	Environmental	Terrestrial	Unclassified	Soil	Unclassified	China		4951322	4905
2822357007	Bacteria	Permanent Draft	Large-scale bioinformatics analysis of Bacillus genomes	Bacillus toyonensis AFS052350	University of North Carolina, Chapel Hill	2822357007	Bacillota	Bacilli	Bacillales	Bacillaceae	Bacillus	Bacillus toyonensis	Yes	Yes	Environmental	Terrestrial	Unclassified	Soil	Unclassified	USA: New York		5539558	5849
2675903663	Bacteria	Permanent Draft	Neobacillus niacini NBRC 15566	Neobacillus niacini NBRC 15566	National Institute of Technology and Evaluation	2675903663	Bacillota	Bacilli	Bacillales	Bacillaceae	Neobacillus	Neobacillus niacini	Yes	Yes	Environmental	Terrestrial	Unclassified	Soil	Unclassified		Soil	6181012	6010
8002608058	Bacteria	Permanent Draft	Roseomonas terrae LMG 31159 genome sequencing	Roseomonas terrae LMG 31159	Ghent University	8002608058	Pseudomonadota	Alphaproteobacteria	Rhodospirillales	Acetobacteraceae	Neoroseomonas	Neoroseomonas terrae	Yes	Yes	Environmental	Terrestrial	Unclassified	Soil	Unclassified	South Korea		5771109	5654
2912263003	Bacteria	Finished	Genome Sequencing of Paenibacillus sp. PAMC21692	Paenibacillus sp. PAMC21692	Korea University	2912263003	Bacillota	Bacilli	Bacillales	Paenibacillaceae	Paenibacillus	Paenibacillus sp. PAMC21692	Yes	Yes	Environmental	Terrestrial	Unclassified	Soil	Unclassified	Antarctica		8591572	6972
8002115004	Bacteria	Permanent Draft	Genomes of Collimonas spp.	Collimonas antrihumi DSM 104040	Guangdong Academy of Sciences	8002115004	Pseudomonadota	Betaproteobacteria	Burkholderiales	Oxalobacteraceae	Collimonas	Collimonas antrihumi	Yes	Yes	Environmental	Terrestrial	Unclassified	Soil	Unclassified		Soil	4722432	4567
2862603961	Bacteria	Finished	Streptomyces olivoreticuli olivoreticuli ATCC 31159 genome sequencing	Streptomyces olivoreticuli olivoreticuli ATCC 31159	Tianjin University of Commerce	2862603961	Actinomycetota	Actinomycetes	Kitasatosporales	Streptomycetaceae	Streptomyces	Streptomyces olivoreticuli	Yes	Yes	Environmental	Terrestrial	Unclassified	Soil	Unclassified	Japan		8809793	7797
2808606944	Bacteria	Permanent Draft	Burkholderia Genome sequencing - Northern Arizona University	Burkholderia ubonensis MSMB1608WGS	Northern Arizona University	2808606944	Pseudomonadota	Betaproteobacteria	Burkholderiales	Burkholderiaceae	Burkholderia	Burkholderia ubonensis	Yes	Yes	Environmental	Terrestrial	Unclassified	Soil	Unclassified	Australia: Tanami East, Northern Territory		8108800	7485
8023328528	Bacteria	Permanent Draft	Bacillus sp. AR13-1 genome sequencing	Bacillus sp. AR13-1	University of Bialystok	8023328528	Bacillota	Bacilli	Bacillales	Bacillaceae	Bacillus	Bacillus sp. AR13-1	Yes	Yes	Environmental	Terrestrial	Unclassified	Soil	Unclassified	Argentina: Buenos Aires, a tawn park		5940870	6447
2993703834	Bacteria	Permanent Draft	Dermacoccaceae bacterium C5-26 genome sequencing	Dermacoccaceae bacterium C5-26	BioPS Co., Ltd.	2993703834	Actinomycetota	Actinomycetes	Micrococcales	Dermacoccaceae	Leekyejoonella	Leekyejoonella antrihumi	Yes	Yes	Environmental	Terrestrial	Unclassified	Soil	Unclassified	South Korea: Jeju		5316486	5276
2744055078	Bacteria	Permanent Draft	Draft Genomes of Chromium Resistant Microbes	Microbacterium sp. K24	Cincinnati Childrens Hospital Medical Center	2744055078	Actinomycetota	Actinomycetes	Micrococcales	Microbacteriaceae	Microbacterium	Microbacterium sp. K24	Yes	Yes	Environmental	Terrestrial	Unclassified	Soil	Contaminated	Seymore, IN		4218721	4258
2915527404	Bacteria	Permanent Draft	Genome Sequencing of Brevibacillus sp. HB1.3	Brevibacillus sp. HB1.3	Nord Reet UG, Greifswald, Germany	2915527404	Bacillota	Bacilli	Bacillales	Paenibacillaceae	Brevibacillus	Brevibacillus sp. HB1.3	Yes	Yes	Environmental	Terrestrial	Unclassified	Soil	Agricultural land	Viet Nam: Cao Phong, Hoa Binh		6066817	5920
2808606888	Bacteria	Finished	Burkholderia Genome sequencing - Northern Arizona University	Burkholderia ubonensis RF23-BP41	Northern Arizona University	2808606888	Pseudomonadota	Betaproteobacteria	Burkholderiales	Burkholderiaceae	Burkholderia	Burkholderia ubonensis	Yes	Yes	Environmental	Terrestrial	Unclassified	Soil	Unclassified	Thailand: Ubon, Kemarach		7961598	7124
2808606697	Bacteria	Finished	Burkholderia Genome sequencing - Northern Arizona University	Burkholderia mayonis BDU8	Northern Arizona University	2808606697	Pseudomonadota	Betaproteobacteria	Burkholderiales	Burkholderiaceae	Burkholderia	Burkholderia mayonis	Yes	Yes	Environmental	Terrestrial	Unclassified	Soil	Unclassified	Australia: Badu Island, Torres Strait		7357530	6440
2875427445	Bacteria	Finished	Streptomyces hygroscopicus Genome sequencing	Streptomyces hygroscopicus XM201	Shanghai Jiao Tong University	2875427445	Actinomycetota	Actinomycetes	Kitasatosporales	Streptomycetaceae	Streptomyces	Streptomyces hygroscopicus	Yes	Yes	Environmental	Terrestrial	Unclassified	Soil	Unclassified	China: Fujian		12012215	10466
2728369569	Bacteria	Permanent Draft	Pseudomonas composti strain:LY1 Genome sequencing	Pseudomonas composti LY1	Qingdao Agriculture University	2728369569	Pseudomonadota	Gammaproteobacteria	Pseudomonadales	Pseudomonadaceae	Pseudomonas	Pseudomonas composti	Yes	Yes	Environmental	Terrestrial	Garden	Soil	Unclassified			5265005	4954
8085676497	Bacteria	Permanent Draft	Arthrobacter sp. H14-L1 genome sequencing	Arthrobacter sp. H14-L1	Ondokuz Mayis University	8085676497	Actinomycetota	Actinomycetes	Micrococcales	Micrococcaceae	Arthrobacter	Arthrobacter sp. H14-L1	Yes	Yes	Environmental	Terrestrial	Unclassified	Soil	Unclassified	Antarctica: Horseshoe Island		3957403	3789
2998802039	Bacteria	Permanent Draft	Gordonia amicalis BB-DAC WGS	Gordonia amicalis BB-DAC	Assam Universuty, Eurofins Genomics India Pvt Ltd.	2998802039	Actinomycetota	Actinomycetes	Mycobacteriales	Gordoniaceae	Gordonia	Gordonia amicalis	Yes	Yes	Environmental	Terrestrial	Contaminated	Soil	Unclassified	India: Dibrugarh, Assam		5182176	4852
2519103075	Bacteria	Permanent Draft	Broad Institute - Bacillus cereus sequencing	Bacillus cereus BAG2X1-1	Broad Institute	2519103075	Bacillota	Bacilli	Bacillales	Bacillaceae	Bacillus	Bacillus cereus	Yes	Yes	Environmental	Terrestrial	Unclassified	Soil	Unclassified	USA: Boston, Massacusetts	Soil	5109238	5362
8032787930	Bacteria	Permanent Draft	Clostridium diolis NJP7 genome sequencing	Clostridium diolis NJP7	Nanjing Tech University	8032787930	Bacillota	Clostridia	Eubacteriales	Clostridiaceae	Clostridium	Clostridium diolis	Yes	Yes	Environmental	Terrestrial	Garden	Soil	Unclassified	China: Nanjing		5756492	5380
2754412351	Bacteria	Permanent Draft	Burkholderia Genome sequencing - Northern Arizona University	Burkholderia stagnalis MSMB1968	Northern Arizona University	2754412351	Pseudomonadota	Betaproteobacteria	Burkholderiales	Burkholderiaceae	Burkholderia	Burkholderia stagnalis	Yes	Yes	Environmental	Terrestrial	Unclassified	Soil	Unclassified			7553634	6769
2970568067	Bacteria	Permanent Draft	Mesorhizobia in Australia	Mesorhizobium sp. B2-3-10	Curtin University	2970568067	Pseudomonadota	Alphaproteobacteria	Hyphomicrobiales	Phyllobacteriaceae	Mesorhizobium	Mesorhizobium sp. B2-3-10	Yes	Yes	Environmental	Terrestrial	Unclassified	Soil	Unclassified	Australia: WA, Badgingarra		6001357	5968
2765235971	Bacteria	Finished	Burkholderia Genome sequencing - Northern Arizona University	Burkholderia metallica FL-6-5-30-S1-D7	Northern Arizona University	2765235971	Pseudomonadota	Betaproteobacteria	Burkholderiales	Burkholderiaceae	Burkholderia	Burkholderia metallica	Yes	Yes	Environmental	Terrestrial	Unclassified	Soil	Unclassified	USA: Florida		7424240	6648
2718218089	Bacteria	Finished	Rhodococcus sp. YL-1 Genome sequencing	Rhodococcus sp. YL-1	Nanjing Agricultural University	2718218089	Actinomycetota	Actinomycetes	Mycobacteriales	Nocardiaceae	Rhodococcus	Rhodococcus sp. YL-1	Yes	Yes	Environmental	Terrestrial	Unclassified	Soil	Unclassified			7594958	7282
8007231259	Bacteria	Permanent Draft	Multiple species of Enterococcus Genome sequencing	Enterococcus sp. MJM12	Broad Institute	8007231259	Bacillota	Bacilli	Lactobacillales	Enterococcaceae	Enterococcus	Enterococcus sp. MJM12	Yes	Yes	Environmental	Terrestrial	Sand	Soil	Unclassified	USA: Massachusetts		2972596	2880
8038910366	Bacteria	Permanent Draft	Burkholderia Genome sequencing - Northern Arizona University	Burkholderia cepacia MSMB839WGS	Northern Arizona University	8038910366	Pseudomonadota	Betaproteobacteria	Burkholderiales	Burkholderiaceae	Burkholderia	Burkholderia cepacia	Yes	Yes	Environmental	Terrestrial	Unclassified	Soil	Unclassified	Australia: Tanami East, Northern Territory		8269906	7657
2854294894	Bacteria	Permanent Draft	Brevibacillus Genome sequencing	Brevibacillus brevis NRRL NRS-604	USDA/ARS/NCAUR	2854294894	Bacillota	Bacilli	Bacillales	Paenibacillaceae	Brevibacillus	Brevibacillus brevis	Yes	Yes	Environmental	Terrestrial	Unclassified	Soil	Unclassified	USA:Iowa		6613222	6722
2832761258	Bacteria	Permanent Draft	Genomes of Corallococcus strains isolated from Aberystwtyh and Carmarthen Areas United Kingdom	Corallococcus llansteffanensis CA051B	Aberystwyth University	2832761258	Myxococcota	Myxococcia	Myxococcales	Myxococcaceae	Corallococcus	Corallococcus llansteffanensis	Yes	Yes	Environmental	Terrestrial	Unclassified	Soil	Unclassified	United Kingdom		10526383	9088
2808606831	Bacteria	Permanent Draft	Burkholderia Genome sequencing - Northern Arizona University	Burkholderia ubonensis INT1-BP158	Northern Arizona University	2808606831	Pseudomonadota	Betaproteobacteria	Burkholderiales	Burkholderiaceae	Burkholderia	Burkholderia ubonensis	Yes	Yes	Environmental	Terrestrial	Unclassified	Soil	Unclassified	Thailand: Ubon		7638890	6900
8062113892	Bacteria	Permanent Draft	Streptomyces reference genome collection	Spirilliplanes yamanashiensis NBRC 15828	Biological Resource Center, National Institute of Technology and Evaluation (NBRC)	8062113892	Actinomycetota	Actinomycetes	Micromonosporales	Micromonosporaceae	Spirilliplanes	Spirilliplanes yamanashiensis	Yes	Yes	Environmental	Terrestrial	Garden	Soil	Unclassified		Soil	6500159	6239
2751186028	Bacteria	Permanent Draft	Burkholderia Genome sequencing - Northern Arizona University	Burkholderia sp. MSMB0265	Northern Arizona University	2751186028	Pseudomonadota	Betaproteobacteria	Burkholderiales	Burkholderiaceae	Burkholderia	Burkholderia sp. MSMB0265	Yes	Yes	Environmental	Terrestrial	Unclassified	Soil	Unclassified	Australia: Tanami East, Northern Territory		7265947	6373
2925013478	Bacteria	Permanent Draft	Genome Sequencing of Flavobacterium silvaticum SE-s28	Flavobacterium silvaticum SE-s28	Chung-Ang University	2925013478	Bacteroidota	Flavobacteriia	Flavobacteriales	Flavobacteriaceae	Flavobacterium	Flavobacterium silvaticum	Yes	Yes	Environmental	Terrestrial	Temperate forest	Soil	Bulk soil	South Korea: Jeju island		3771472	3442
2751185829	Bacteria	Finished	Sphingopyxis sp. QXT-31 Genome sequencing	Sphingopyxis sp. QXT-31	Chinese Academy of Sciences	2751185829	Pseudomonadota	Alphaproteobacteria	Sphingomonadales	Sphingomonadaceae	Sphingopyxis	Sphingopyxis sp. QXT-31	Yes	Yes	Environmental	Terrestrial	Unclassified	Soil	Unclassified	China: Hunan province		4285026	4102
2894216945	Bacteria	Permanent Draft	Modestobacter sp. KNN46-3 genome sequencing	Modestobacter sp. KNN46-3	Northumbria University	2894216945	Actinomycetota	Actinomycetes	Geodermatophilales	Geodermatophilaceae	Modestobacter	Modestobacter sp. KNN46-3	Yes	Yes	Environmental	Terrestrial	Unclassified	Soil	Unclassified	Chile: Yungay core-region		5406102	5596
8040146080	Bacteria	Permanent Draft	Burkholderia Genome sequencing - Northern Arizona University	Burkholderia stagnalis MSMB1514WGS	Northern Arizona University	8040146080	Pseudomonadota	Betaproteobacteria	Burkholderiales	Burkholderiaceae	Burkholderia	Burkholderia stagnalis	Yes	Yes	Environmental	Terrestrial	Unclassified	Soil	Unclassified	Australia: Tanami East, Northern Territory		7920359	7298
8021128567	Bacteria	Permanent Draft	Burkholderia sp. SRS-25 Genome sequencing	Burkholderia sp. SRS-25	Florida A and M University	8021128567	Pseudomonadota	Betaproteobacteria	Burkholderiales	Burkholderiaceae	Burkholderia	Burkholderia sp. SRS-25	Yes	Yes	Environmental	Terrestrial	Unclassified	Soil	Unclassified	USA: Aiken, South Carolina		8152304	7511
2645728032	Bacteria	Permanent Draft	Taxonomy and phylogenomics of Bacillus-like bacteria	Neobacillus vireti DSM 15602	Fujian Academy of Agricultural Sciences	2645728032	Bacillota	Bacilli	Bacillales	Bacillaceae	Neobacillus	Neobacillus vireti	Yes	Yes	Environmental	Terrestrial	Unclassified	Soil	Unclassified			5306772	5267
8080411998	Bacteria	Permanent Draft	Nocardioides sp. R-C-SC26 genome sequencing	Nocardioides sp. R-C-SC26	State Key Laboratory for Conservation and Utilization of Bio-Resources in Yunnan	8080411998	Actinomycetota	Actinomycetes	Propionibacteriales	Nocardioidaceae	Nocardioides	Nocardioides sp. R-C-SC26	Yes	Yes	Environmental	Terrestrial	Unclassified	Soil	Unclassified			3717507	3592
2675903372	Bacteria	Finished	Complete genome sequencing of Bacillus sp. IHB B 7164	Bacillus sp. IHB B 7164	CSIR-Institute of Himalayan Bioresource Technology	2675903372	Bacillota	Bacilli	Bacillales	Bacillaceae	Bacillus	Bacillus sp. IHB B 7164	Yes	Yes	Environmental	Terrestrial	Unclassified	Soil	Unclassified		Soil	5036631	5299
2537561971	Bacteria	Permanent Draft	Broad Institute - Bacillus cereus sequencing	Bacillus cereus B5-2	Broad Institute	2537561971	Bacillota	Bacilli	Bacillales	Bacillaceae	Bacillus	Bacillus cereus	Yes	Yes	Environmental	Terrestrial	Unclassified	Soil	Unclassified			5798705	6062
8073841274	Bacteria	Permanent Draft	endophyte metagenome Genome sequencing and assembly	Agromyces sp. S2-1-8	Korea Research Institute of Bioscience and Biotechnology	8073841274	Actinomycetota	Actinomycetes	Micrococcales	Microbacteriaceae	Agromyces	Agromyces sp. S2-1-8	Yes	Yes	Environmental	Terrestrial	Unclassified	Soil	Unclassified	South Korea		4099562	3761
2920863029	Bacteria	Permanent Draft	Genome Sequencing of Hymenobacter duratus BT646	Hymenobacter duratus BT646	Seoul Womens University	2920863029	Bacteroidota	Cytophagia	Cytophagales	Hymenobacteraceae	Hymenobacter	Hymenobacter duratus	Yes	Yes	Environmental	Terrestrial	Unclassified	Soil	Unclassified	South Korea: Gwangju-si		4665453	4077
2925776426	Bacteria	Finished	Genome Sequencing of Pseudomonas sp. B14-6	Pseudomonas sp. B14-6	Konkuk University	2925776426	Pseudomonadota	Gammaproteobacteria	Pseudomonadales	Pseudomonadaceae	Pseudomonas	Pseudomonas sp. B14-6	Yes	Yes	Environmental	Terrestrial	Unclassified	Soil	Unclassified	Svalbard: Midtre Lovenbreen, Ny-Alesund		6766112	6496
2977359859	Bacteria	Finished	De novo sequencing of myxobacteria isolates	Myxococcus landrumus SCHIC003	University of Mississippi	2977359859	Myxococcota	Myxococcia	Myxococcales	Myxococcaceae	Myxococcus	Myxococcus landrumus	Yes	Yes	Environmental	Terrestrial	Unclassified	Soil	Unclassified	USA: Tryon, SC		10367529	8237
2808606847	Bacteria	Permanent Draft	Burkholderia Genome sequencing - Northern Arizona University	Burkholderia ubonensis MSMB2118WGS	Northern Arizona University	2808606847	Pseudomonadota	Betaproteobacteria	Burkholderiales	Burkholderiaceae	Burkholderia	Burkholderia ubonensis	Yes	Yes	Environmental	Terrestrial	Unclassified	Soil	Unclassified	Australia: Tanami East, Northern Territory		7154805	6384
2811995169	Bacteria	Permanent Draft	Genome sequencing of Streptomyces type strains - USDA	Streptomyces vinaceus NRRL B-1733	USDA/ARS/NCAUR	2811995169	Actinomycetota	Actinomycetes	Kitasatosporales	Streptomycetaceae	Streptomyces	Streptomyces vinaceus	Yes	Yes	Environmental	Terrestrial	Unclassified	Soil	Unclassified	Saudi Arabia		6881178	6668
8020967603	Bacteria	Permanent Draft	Sequencing of Burkholderia species from Puerto Rico	Burkholderia sp. Bp8984	Northern Arizona University	8020967603	Pseudomonadota	Betaproteobacteria	Burkholderiales	Burkholderiaceae	Burkholderia	Burkholderia sp. Bp8984	Yes	Yes	Environmental	Terrestrial	Unclassified	Soil	Unclassified	Puerto Rico: JUNCOS		7550891	7078
2867252554	Bacteria	Permanent Draft	Streptomyces sp. Tu 4128 Genome sequencing	Streptomyces sp. Tu 4128	State Key Laboratory of Bioreactor Engineering	2867252554	Actinomycetota	Actinomycetes	Kitasatosporales	Streptomycetaceae	Streptomyces	Streptomyces sp. Tu 4128	Yes	Yes	Environmental	Terrestrial	Unclassified	Soil	Unclassified	Indonesia: Java		8424112	7793
2989459580	Bacteria	Permanent Draft	Nonomuraea cypriaca K274	Nonomuraea cypriaca K274	Sinop University	2989459580	Actinomycetota	Actinomycetes	Streptosporangiales	Streptosporangiaceae	Nonomuraea	Nonomuraea cypriaca	Yes	Yes	Environmental	Terrestrial	Unclassified	Soil	Unclassified	Cyprus: Zafer Cape		11548603	11594
2558860198	Bacteria	Finished	Fimbriimonas ginsengisoli Gsoil 348	Fimbriimonas ginsengisoli Gsoil 348	Chinese National Human Genome Center at Shanghai	2558860198	Armatimonadota	Fimbriimonadia	Fimbriimonadales	Fimbriimonadaceae	Fimbriimonas	Fimbriimonas ginsengisoli	No	Yes	Environmental	Terrestrial	Garden	Soil	Unclassified	Pocheon Province, South Korea	Soil	5231762	3571
2754412329	Bacteria	Permanent Draft	Burkholderia Genome sequencing - Northern Arizona University	Burkholderia stagnalis MSMB1543	Northern Arizona University	2754412329	Pseudomonadota	Betaproteobacteria	Burkholderiales	Burkholderiaceae	Burkholderia	Burkholderia stagnalis	Yes	Yes	Environmental	Terrestrial	Unclassified	Soil	Unclassified	Australia: Tanami East, Northern Territory		7582277	6765
8061963098	Bacteria	Finished	Methylogaea oryzae E10 genome sequencing	Methylogaea oryzae E10	Nagoya University	8061963098	Pseudomonadota	Gammaproteobacteria	Methylococcales	Methylococcaceae	Methylogaea	Methylogaea oryzae	Yes	Yes	Environmental	Terrestrial	Unclassified	Soil	Agricultural land	Uruguay, Treinta y Tres	Aquatic, Soil	4018824	3610
2576861677	Bacteria	Permanent Draft	Evolution of bacterial morphology, Indiana University	Asticcacaulis benevestitus DSM 16100, ATCC BAA-896	Indiana University	2576861677	Pseudomonadota	Alphaproteobacteria	Caulobacterales	Caulobacteraceae	Asticcacaulis	Asticcacaulis benevestitus	Yes	Yes	Environmental	Terrestrial	Unclassified	Soil	Unclassified	Northeast of Vorkuta, Russia	Soil, Wetland	5005544	4672
3007773358	Bacteria	Finished	Pseudomonas sp. ABC1	Pseudomonas sp. ABC1	Pontificia Universidad Catolica de Valparaiso	3007773358	Pseudomonadota	Gammaproteobacteria	Pseudomonadales	Pseudomonadaceae	Pseudomonas	Pseudomonas sp. ABC1	Yes	Yes	Environmental	Terrestrial	Unclassified	Soil	Unclassified	Chile: Valparaiso		4035896	3619
8061158202	Bacteria	Permanent Draft	Large-scale bioinformatics analysis of Bacillus genomes	Bacillus thuringiensis AFS009835	University of North Carolina, Chapel Hill	8061158202	Bacillota	Bacilli	Bacillales	Bacillaceae	Bacillus	Bacillus thuringiensis	Yes	Yes	Environmental	Terrestrial	Unclassified	Soil	Unclassified	USA: New York		5824770	6181
2851689844	Bacteria	Finished	Enterobacter ludwigii JP6 genome sequencing	Enterobacter ludwigii JP6	Shandong Agricultural University	2851689844	Pseudomonadota	Gammaproteobacteria	Enterobacterales	Enterobacteriaceae	Enterobacter	Enterobacter ludwigii	Yes	Yes	Environmental	Terrestrial	Garden	Soil	Unclassified	China: Hunan Province		4681598	4677
2856722873	Bacteria	Permanent Draft	Streptosporangium nondiastaticum TBG75A20 genome sequencing	Streptosporangium nondiastaticum TBG75A20	Jawaharlal Nehru University	2856722873	Actinomycetota	Actinomycetes	Streptosporangiales	Streptosporangiaceae	Streptosporangium	Streptosporangium nondiastaticum	Yes	Yes	Environmental	Terrestrial	Forest	Soil	Unclassified	India: Kerala, Western Ghats, Neyyar Wild Life Sanctuary, Agasthyamala		8034861	7476
2728368988	Bacteria	Permanent Draft	triple species linuron degrading consortium	Hyphomicrobium sulfonivorans WDL6	Ku Leuven	2728368988	Pseudomonadota	Alphaproteobacteria	Hyphomicrobiales	Hyphomicrobiaceae	Hyphomicrobium	Hyphomicrobium sulfonivorans	Yes	Yes	Environmental	Terrestrial	Unclassified	Soil	Unclassified	Belgium: Sint-Truiden		3691145	3471
2627853631	Bacteria	Finished	Clostridium sporogenes strain:NCIMB 10696 Genome sequencing	Clostridium sporogenes NCIMB 10696	Goettingen Genomics Laboratory	2627853631	Bacillota	Clostridia	Eubacteriales	Clostridiaceae	Clostridium	Clostridium sporogenes	Yes	Yes	Environmental	Terrestrial	Unclassified	Soil	Unclassified		Soil	4141984	3891
8045633941	Bacteria	Permanent Draft	Dyadobacter diqingensis YIM B04101 genome sequencing	Dyadobacter diqingensis YIM B04101	Yunnan University	8045633941	Bacteroidota	Cytophagia	Cytophagales	Spirosomataceae	Dyadobacter	Dyadobacter diqingensis	Yes	Yes	Environmental	Terrestrial	Unclassified	Soil	Unclassified	China	Soil	7264748	6093
2758568018	Bacteria	Finished	Genome sequencing of Sphingobacterium sp. G1-14	Sphingobacterium sp. G1-14	Changzhou University	2758568018	Bacteroidota	Sphingobacteriia	Sphingobacteriales	Sphingobacteriaceae	Sphingobacterium	Sphingobacterium sp. G1-14	Yes	Yes	Environmental	Terrestrial	Unclassified	Soil	Unclassified	China: Changzhou		6325678	5533
8038578739	Bacteria	Permanent Draft	Burkholderia Genome sequencing - Northern Arizona University	Burkholderia cepacia INT3-BP131	Northern Arizona University	8038578739	Pseudomonadota	Betaproteobacteria	Burkholderiales	Burkholderiaceae	Burkholderia	Burkholderia cepacia	Yes	Yes	Environmental	Terrestrial	Unclassified	Soil	Unclassified	Thailand: Ubon		8731097	8238
2894938927	Bacteria	Permanent Draft	Oceanobacillus salinisoli YIM B00359 genome sequencing	Oceanobacillus salinisoli YIM B00359	Yunnan Institute of Microbiology	2894938927	Bacillota	Bacilli	Bacillales	Bacillaceae	Oceanobacillus	Oceanobacillus salinisoli	Yes	Yes	Environmental	Terrestrial	Unclassified	Soil	Unclassified	China: XinJiang		4319553	4345
2837695235	Bacteria	Permanent Draft	Pseudoflavitalea rhizosphaerae KACC 18655 genome sequencing	Pseudoflavitalea rhizosphaerae KACC 18655	Hebei North University	2837695235	Bacteroidota	Chitinophagia	Chitinophagales	Chitinophagaceae	Pseudoflavitalea	Pseudoflavitalea rhizosphaerae	Yes	Yes	Environmental	Terrestrial	Unclassified	Soil	Unclassified	South Korea: Buyeo-gun, Chungcheongnam-do		6708514	5522
2822387748	Bacteria	Permanent Draft	Large-scale bioinformatics analysis of Bacillus genomes	Bacillus toyonensis AFS017687	University of North Carolina, Chapel Hill	2822387748	Bacillota	Bacilli	Bacillales	Bacillaceae	Bacillus	Bacillus toyonensis	Yes	Yes	Environmental	Terrestrial	Unclassified	Soil	Unclassified	USA: Iowa		5996256	6261
2754412404	Bacteria	Permanent Draft	Burkholderia Genome sequencing - Northern Arizona University	Burkholderia diffusa MSMB866	Northern Arizona University	2754412404	Pseudomonadota	Betaproteobacteria	Burkholderiales	Burkholderiaceae	Burkholderia	Burkholderia diffusa	Yes	Yes	Environmental	Terrestrial	Unclassified	Soil	Unclassified	Australia: Tanami East, Northern Territory		6760973	6110
2744054510	Bacteria	Permanent Draft	Rhizobium altiplani BR10423 genome sequencing	Rhizobium altiplani BR10423	Embrapa Agrobiologia	2744054510	Pseudomonadota	Alphaproteobacteria	Hyphomicrobiales	Rhizobiaceae	Rhizobium	Rhizobium altiplani	Yes	Yes	Environmental	Terrestrial	Garden	Soil	Unclassified			8099210	8077
8040229093	Bacteria	Permanent Draft	Burkholderia Genome sequencing - Northern Arizona University	Burkholderia stagnalis MSMB757WGS	Northern Arizona University	8040229093	Pseudomonadota	Betaproteobacteria	Burkholderiales	Burkholderiaceae	Burkholderia	Burkholderia stagnalis	Yes	Yes	Environmental	Terrestrial	Unclassified	Soil	Unclassified	Australia: Tanami East, Northern Territory		7512963	6980
3007431619	Bacteria	Permanent Draft	Whole genome sequencing and assembly of denitrifying soil isolates	Pseudomonas sp. PDM04	University of Chicago	3007431619	Pseudomonadota	Gammaproteobacteria	Pseudomonadales	Pseudomonadaceae	Pseudomonas	Pseudomonas sp. PDM04	Yes	Yes	Environmental	Terrestrial	Unclassified	Soil	Unclassified	USA		6462306	6054
2884525351	Bacteria	Finished	Spiribacter sp. E85 genome sequencing	Saccharopolyspora sp. ASAGF58	Academy of National Food and Strategic Reserves Administration	2884525351	Actinomycetota	Actinomycetes	Pseudonocardiales	Pseudonocardiaceae	Saccharopolyspora	Saccharopolyspora sp. ASAGF58	Yes	Yes	Environmental	Terrestrial	Unclassified	Soil	Unclassified	China: Wenzhou		8045912	7873
8061170539	Bacteria	Permanent Draft	Bacillus thuringiensis genome sequencing	Bacillus thuringiensis sv. wuhanensis BGSC 4T1	Huazhong Agricultural University	8061170539	Bacillota	Bacilli	Bacillales	Bacillaceae	Bacillus	Bacillus thuringiensis	Yes	Yes	Environmental	Terrestrial	Unclassified	Soil	Unclassified	China		6336696	6930
8084983812	Bacteria	Permanent Draft	Limnobacter sp. P1 genome sequencing	Limnobacter sp. P1	Zhoukou Normal University	8084983812	Pseudomonadota	Betaproteobacteria	Burkholderiales	Burkholderiaceae	Limnobacter	Limnobacter sp. P1	Yes	Yes	Environmental	Terrestrial	Unclassified	Soil	Unclassified	China: Daqing city		3396685	3361
2886961220	Bacteria	Permanent Draft	Rubrivivax benzoatilyticus JA2-Mal genome sequencing	Rubrivivax benzoatilyticus JA2-Mal	Jawaharlal Nehru Technological University Hyderabad (JNTUH)	2886961220	Pseudomonadota	Betaproteobacteria	Burkholderiales	Sphaerotilaceae	Rubrivivax	Rubrivivax benzoatilyticus	Yes	Yes	Environmental	Terrestrial	Unclassified	Soil	Unclassified	India: Elluru		4157263	3899
8067062936	Bacteria	Permanent Draft	Microbispora hainanensis DSM 45428	Microbispora hainanensis DSM 45428	King Mongkuts University of Technology Thonburi	8067062936	Actinomycetota	Actinomycetes	Streptosporangiales	Streptosporangiaceae	Microbispora	Microbispora hainanensis	Yes	Yes	Environmental	Terrestrial	Unclassified	Soil	Unclassified	China		8717787	8315
2971953900	Bacteria	Finished	Bacillus mycoides Gnyt1 Genome sequencing	Bacillus mycoides Gnyt1	Gansu Agricultural University	2971953900	Bacillota	Bacilli	Bacillales	Bacillaceae	Bacillus	Bacillus mycoides	Yes	Yes	Environmental	Terrestrial	Unclassified	Soil	Unclassified	China: Zhuaxixiulong township, Tianzhu county, Wuwei city.		6558090	7250
2896293972	Bacteria	Permanent Draft	Sphingobacterium olei HAL-9 genome sequencing	Sphingobacterium olei HAL-9	Nanjing Agricultural University	2896293972	Bacteroidota	Sphingobacteriia	Sphingobacteriales	Sphingobacteriaceae	Sphingobacterium	Sphingobacterium olei	Yes	Yes	Environmental	Terrestrial	Unclassified	Soil	Unclassified	China: Daqing		5406411	4706
2731957745	Bacteria	Permanent Draft	Nocardia genome sequencing - National Institute of Technology and Evaluation, Japan	Nocardia shimofusensis NBRC 100134	National Institute of Technology and Evaluation	2731957745	Actinomycetota	Actinomycetes	Mycobacteriales	Nocardiaceae	Nocardia	Nocardia shimofusensis	Yes	Yes	Environmental	Terrestrial	Unclassified	Soil	Unclassified	Choshi, Chiba	Soil	6327648	5752
8040222102	Bacteria	Permanent Draft	Burkholderia Genome sequencing - Northern Arizona University	Burkholderia stagnalis MSMB756WGS	Northern Arizona University	8040222102	Pseudomonadota	Betaproteobacteria	Burkholderiales	Burkholderiaceae	Burkholderia	Burkholderia stagnalis	Yes	Yes	Environmental	Terrestrial	Unclassified	Soil	Unclassified	Australia: Tanami East, Northern Territory		7522268	6986
3000576437	Bacteria	Permanent Draft	Lacisediminihabitans changchengi G11-30	Lacisediminihabitans changchengi G11-30	Ocean University of China	3000576437	Actinomycetota	Actinomycetes	Micrococcales	Microbacteriaceae	Lacisediminihabitans	Lacisediminihabitans changchengi	Yes	Yes	Environmental	Terrestrial	Unclassified	Soil	Unclassified	Antarctica		3412448	3267
2890053249	Bacteria	Permanent Draft	Bacteria Genome sequencing	Beijerinckia sp. L45	Institute of Microbiology of the AS CR	2890053249	Pseudomonadota	Alphaproteobacteria	Hyphomicrobiales	Beijerinckiaceae	Beijerinckia	Beijerinckia sp. L45	Yes	Yes	Environmental	Terrestrial	Unclassified	Soil	Unclassified	Czech Republic		5672648	5950
2866691068	Bacteria	Permanent Draft	Whole-genome analyses of novel actinobacteria	Streptomyces sp. 8K308	Ondokuz Mayis University	2866691068	Actinomycetota	Actinomycetes	Kitasatosporales	Streptomycetaceae	Streptomyces	Streptomyces sp. 8K308	Yes	Yes	Environmental	Terrestrial	Sand	Soil	Desert	Turkmenistan: Askabat		7755217	7738
2561511152	Bacteria	Finished	Bacillus thuringiensis YBT-1518	Bacillus thuringiensis YBT-1518	Huazhong Agricultural University	2561511152	Bacillota	Bacilli	Bacillales	Bacillaceae	Bacillus	Bacillus thuringiensis	Yes	Yes	Environmental	Terrestrial	Unclassified	Soil	Unclassified		Plant surface, Soil	6672921	6877
2754412314	Bacteria	Permanent Draft	Burkholderia Genome sequencing - Northern Arizona University	Burkholderia stagnalis MSMB847WGS	Northern Arizona University	2754412314	Pseudomonadota	Betaproteobacteria	Burkholderiales	Burkholderiaceae	Burkholderia	Burkholderia stagnalis	Yes	Yes	Environmental	Terrestrial	Unclassified	Soil	Unclassified	Australia: Tanami East, Northern Territory		7616362	6841
2816332278	Bacteria	Permanent Draft	Burkholderia Genome sequencing - Northern Arizona University	Burkholderia vietnamiensis FL-7-4-30-S2-D0	Northern Arizona University	2816332278	Pseudomonadota	Betaproteobacteria	Burkholderiales	Burkholderiaceae	Burkholderia	Burkholderia vietnamiensis	Yes	Yes	Environmental	Terrestrial	Unclassified	Soil	Unclassified	USA: Florida		6860529	6173
3002245378	Bacteria	Permanent Draft	Microvirga alba BT350	Microvirga alba BT350	Seoul Womens University	3002245378	Pseudomonadota	Alphaproteobacteria	Hyphomicrobiales	Methylobacteriaceae	Microvirga	Microvirga alba	Yes	Yes	Environmental	Terrestrial	Unclassified	Soil	Unclassified	South Korea: Jeju Island		4424757	4246
2885465677	Bacteria	Permanent Draft	Bacteria Genome sequencing and assembly	Flavobacterium sp. ATCC 35103	McMaster University	2885465677	Bacteroidota	Flavobacteriia	Flavobacteriales	Flavobacteriaceae	Flavobacterium	[Flexibacter] sp. ATCC 35103	Yes	Yes	Environmental	Terrestrial	Unclassified	Soil	Unclassified	USA: Rocky Hill, New Jersey		5681809	4808
2523231045	Bacteria	Permanent Draft	Gordonia rubripertincta NBRC 101908	Gordonia rubripertincta NBRC 101908	National Institute of Technology and Evaluation	2523231045	Actinomycetota	Actinomycetes	Mycobacteriales	Gordoniaceae	Gordonia	Gordonia rubripertincta	Yes	Yes	Environmental	Terrestrial	Unclassified	Soil	Unclassified		Soil	5204225	4856
8003457684	Bacteria	Permanent Draft	Novosphingobium sp. G106 genome sequencing	Novosphingobium sp. G106	Hankyong National University	8003457684	Pseudomonadota	Alphaproteobacteria	Sphingomonadales	Sphingomonadaceae	Novosphingobium	Novosphingobium sp. G106	Yes	Yes	Environmental	Terrestrial	Unclassified	Soil	Unclassified	South Korea: Yeongju		7227927	7396
2758568007	Bacteria	Draft	Oceanobacillus rekensis PT-11	Oceanobacillus rekensis PT-11	Sichuan University	2758568007	Bacillota	Bacilli	Bacillales	Bacillaceae	Oceanobacillus	Oceanobacillus rekensis	Yes	Yes	Environmental	Terrestrial	Unclassified	Soil	Unclassified	China: Reke Town, Xinjiang		3861428	3843
2731957751	Bacteria	Permanent Draft	Nocardia genome sequencing - National Institute of Technology and Evaluation, Japan	Nocardia uniformis NBRC 13702	National Institute of Technology and Evaluation	2731957751	Actinomycetota	Actinomycetes	Mycobacteriales	Nocardiaceae	Nocardia	Nocardia uniformis	Yes	Yes	Environmental	Terrestrial	Unclassified	Soil	Unclassified	Hungary, Hortobagy Steppe	Soil	8763428	8174
2884355953	Bacteria	Finished	Pontibacter sp. BT214 genome sequencing	Pontibacter pudoricolor BT214	Seoul Womens University	2884355953	Bacteroidota	Cytophagia	Cytophagales	Hymenobacteraceae	Pontibacter	Pontibacter pudoricolor	Yes	Yes	Environmental	Terrestrial	Unclassified	Soil	Unclassified	South Korea: Seoul		4344619	3881
8034996212	Bacteria	Permanent Draft	Pseudomonas atacamensis M7D1 genome sequencing	Pseudomonas atacamensis M7D1	Autonomous University of Chile	8034996212	Pseudomonadota	Gammaproteobacteria	Pseudomonadales	Pseudomonadaceae	Pseudomonas	Pseudomonas atacamensis	Yes	Yes	Environmental	Terrestrial	Unclassified	Soil	Unclassified	Chile: Region de Atacama, Huasco, C-46		6170633	5671
8046435746	Bacteria	Permanent Draft	Geothrix terrae SG184 genome sequencing	Geothrix terrae SG184	Fujian Agriculture and Forestry University	8046435746	Acidobacteriota	Holophagae	Holophagales	Holophagaceae	Geothrix	Geothrix terrae	Yes	Yes	Environmental	Terrestrial	Agricultural land	Soil	Unclassified	China		3428306	3195
2989646869	Bacteria	Permanent Draft	Halomonas salicampi BH103	Halomonas salicampi BH103	The Third Institute of Oceanography, Key Laboratory of Marine Biogenetic Resources	2989646869	Pseudomonadota	Gammaproteobacteria	Oceanospirillales	Halomonadaceae	Vreelandella	Vreelandella salicampi	Yes	Yes	Environmental	Terrestrial	Unclassified	Soil	Unclassified	South Korea: Byeonsan Peninsula		3864100	3680
2861773553	Bacteria	Permanent Draft	Streptosporangiaceae bacterium YIM 75507 genome sequencing	Bailinhaonella thermotolerans YIM 75507	Yunnan Institute of Microbiology	2861773553	Actinomycetota	Actinomycetes	Streptosporangiales	Streptosporangiaceae	Bailinhaonella	Bailinhaonella thermotolerans	Yes	Yes	Environmental	Terrestrial	Unclassified	Soil	Unclassified	China		8989662	8313
8064669860	Bacteria	Finished	Frateuria sp. 5GH9-34 Genome sequencing	Frateuria sp. ARS01V-12	National Institute of Agricultural Science	8064669860	Pseudomonadota	Gammaproteobacteria	Xanthomonadales	Rhodanobacteraceae	Frateuria	Frateuria edaphi	Yes	Yes	Environmental	Terrestrial	Garden	Soil	Unclassified	South Korea: Gyeonggi-do, Suwon-si, Gwonseon-gu, Seodun-dong		3769403	3524
2808606823	Bacteria	Permanent Draft	Burkholderia Genome sequencing - Northern Arizona University	Burkholderia ubonensis MSMB1603WGS	Northern Arizona University	2808606823	Pseudomonadota	Betaproteobacteria	Burkholderiales	Burkholderiaceae	Burkholderia	Burkholderia ubonensis	Yes	Yes	Environmental	Terrestrial	Unclassified	Soil	Unclassified	Australia: Tanami East, Northern Territory		7063307	6344
8008475936	Bacteria	Permanent Draft	Streptomyces sp. NEAU-C151 genome sequencing	Streptomyces montanus NEAU-C151	Northeast Agricultural University	8008475936	Actinomycetota	Actinomycetes	Kitasatosporales	Streptomycetaceae	Streptomyces	Streptomyces montanus	Yes	Yes	Environmental	Terrestrial	Unclassified	Soil	Unclassified	China		10225480	9496
8038488089	Bacteria	Permanent Draft	Burkholderia Genome sequencing - Northern Arizona University	Burkholderia territorii MSMB0579	Northern Arizona University	8038488089	Pseudomonadota	Betaproteobacteria	Burkholderiales	Burkholderiaceae	Burkholderia	Burkholderia territorii	Yes	Yes	Environmental	Terrestrial	Unclassified	Soil	Unclassified	Australia: Tanami East, Northern Territory		6851652	6318
2885905433	Bacteria	Permanent Draft	Population genomics tropical Pseudomonas	Pseudomonas sp. R12(2017)	University of Sao Paulo	2885905433	Pseudomonadota	Gammaproteobacteria	Pseudomonadales	Pseudomonadaceae	Pseudomonas	Pseudomonas sp. R12(2017)	Yes	Yes	Environmental	Terrestrial	Loam	Soil	Agricultural soil	Brazil: Piracicaba, Sao Paulo		6215756	5698
2841009013	Bacteria	Permanent Draft	Actinomadura logoneensis NEAU-G17 genome sequencing	Actinomadura logoneensis NEAU-G17	Northeast Agricultural University	2841009013	Actinomycetota	Actinomycetes	Streptosporangiales	Thermomonosporaceae	Actinomadura	Actinomadura logoneensis	Yes	Yes	Environmental	Terrestrial	Unclassified	Soil	Unclassified	Chad: Ndjamena		8093581	8044
8032665715	Bacteria	Permanent Draft	Burkholderia Genome sequencing - Northern Arizona University	Burkholderia multivorans MSMB2008WGS	Northern Arizona University	8032665715	Pseudomonadota	Betaproteobacteria	Burkholderiales	Burkholderiaceae	Burkholderia	Burkholderia multivorans	Yes	Yes	Environmental	Terrestrial	Unclassified	Soil	Unclassified	Australia: Tanami East, Northern Territory		6446805	6011
2916864039	Bacteria	Permanent Draft	Gottfriedia luciferensis DSM 18845 genome sequencing	Gottfriedia luciferensis DSM 18845	Lycoming College	2916864039	Bacillota	Bacilli	Bacillales	Bacillaceae	Gottfriedia	Gottfriedia luciferensis	Yes	Yes	Environmental	Terrestrial	Unclassified	Soil	Unclassified	Atlantic Ocean: South Sandwich		4426802	4604
2529292565	Bacteria	Permanent Draft	Westiella intricata UH strain HT-29-1	Westiella intricata UH HT-29-1	Beijing Genomics Institute (BGI)	2529292565	Cyanobacteriota	Cyanophyceae	Nostocales	Hapalosiphonaceae	Westiella	Westiella intricata	No	Yes	Environmental	Terrestrial	Unclassified	Soil	Unclassified	Moen Island, Truk Atoll, Caroline Islands		7050886	6086
8001013653	Bacteria	Permanent Draft	PWU Project	Dawidia soli PWU37	Helmholtz Centre for Infection Research	8001013653	Bacteroidota	Cytophagia	Cytophagales	Cytophagaceae	Dawidia	Dawidia soli	Yes	Yes	Environmental	Terrestrial	Unclassified	Soil	Unclassified	Germany: Braunschweig		7476949	6305
2905684347	Bacteria	Permanent Draft	Mycobacterium Genome sequencing and assembly	Mycolicibacterium sp. CBMA 334	Instituto Oswaldo Cruz	2905684347	Actinomycetota	Actinomycetes	Mycobacteriales	Mycobacteriaceae	Mycolicibacterium	Mycolicibacterium sp. CBMA 334	Yes	Yes	Environmental	Terrestrial	Unclassified	Soil	Unclassified	Brazil: Rio de Janeiro, Parnaso		6310535	6142
2773857839	Bacteria	Finished	Genome sequencing of Paenibacillus kribbensis AM49	Paenibacillus kribbensis AM49	Korea Research Institute of Bioscience and Biotechnology	2773857839	Bacillota	Bacilli	Bacillales	Paenibacillaceae	Paenibacillus	Paenibacillus kribbensis	Yes	Yes	Environmental	Terrestrial	Unclassified	Soil	Unclassified	South Korea: Daejeon		5778702	5236
2877719830	Bacteria	Finished	Streptomyces clavuligerus F1D-5 genome sequencing	Streptomyces clavuligerus F1D-5	Shandong Academy of Medical Sciences	2877719830	Actinomycetota	Actinomycetes	Kitasatosporales	Streptomycetaceae	Streptomyces	Streptomyces clavuligerus	Yes	Yes	Environmental	Terrestrial	Unclassified	Soil	Unclassified	China: Jinan		8059125	6882
8050765351	Bacteria	Permanent Draft	Burkholderia Genome sequencing - Northern Arizona University	Burkholderia ubonensis MSMB1178WGS	Northern Arizona University	8050765351	Pseudomonadota	Betaproteobacteria	Burkholderiales	Burkholderiaceae	Burkholderia	Burkholderia ubonensis	Yes	Yes	Environmental	Terrestrial	Unclassified	Soil	Unclassified	Australia: Tanami East, Northern Territory		7620256	7107
2822832052	Bacteria	Permanent Draft	Large-scale bioinformatics analysis of Bacillus genomes	Bacillus toyonensis AFS054461	University of North Carolina, Chapel Hill	2822832052	Bacillota	Bacilli	Bacillales	Bacillaceae	Bacillus	Bacillus toyonensis	Yes	Yes	Environmental	Terrestrial	Unclassified	Soil	Unclassified	USA: Iowa		5976092	6281
8007155560	Bacteria	Permanent Draft	Burkholderia Genome sequencing - Northern Arizona University	Burkholderia ubonensis MSMB2087WGS	Northern Arizona University	8007155560	Pseudomonadota	Betaproteobacteria	Burkholderiales	Burkholderiaceae	Burkholderia	Burkholderia ubonensis	Yes	Yes	Environmental	Terrestrial	Unclassified	Soil	Unclassified	Australia: Tanami East, Northern Territory		8151689	7952
3007768848	Bacteria	Permanent Draft	Pseudomonas sp. UL073 Genome sequencing	Pseudomonas sp. UL073	Chungnam National University	3007768848	Pseudomonadota	Gammaproteobacteria	Pseudomonadales	Pseudomonadaceae	Pseudomonas	Pseudomonas insulae	Yes	Yes	Environmental	Terrestrial	Garden	Soil	Unclassified	South Korea: Ulleung-gun		4869730	4505
2899406411	Bacteria	Permanent Draft	Amycolatopsis and Streptomyces type strains genome sequencing and assembly	Amycolatopsis rhizosphaerae TBRC 6029	Kasetsart University	2899406411	Actinomycetota	Actinomycetes	Pseudonocardiales	Pseudonocardiaceae	Amycolatopsis	Amycolatopsis rhizosphaerae	Yes	Yes	Environmental	Terrestrial	Unclassified	Soil	Unclassified	Thailand: Suphanburi province		7666057	7855
8008375543	Bacteria	Permanent Draft	Chromosomal and plasmid sequences from Bacillus thuringiensis	Bacillus thuringiensis NRRL B-18679	University of Bath	8008375543	Bacillota	Bacilli	Bacillales	Bacillaceae	Bacillus	Bacillus thuringiensis	Yes	Yes	Environmental	Terrestrial	Unclassified	Soil	Unclassified		Soil, Host	5858176	6542
2883200189	Bacteria	Finished	Nordella sp. HKS 07 genome sequencing	Nordella sp. HKS 07	Hankyong National University	2883200189	Pseudomonadota	Alphaproteobacteria	Hyphomicrobiales	unclassified	Nordella	Nordella sp. HKS 07	Yes	Yes	Environmental	Terrestrial	Unclassified	Soil	Unclassified	South Korea: Anseong		7184314	7058
2537561847	Bacteria	Permanent Draft	Broad Institute - Bacillus cereus sequencing	Bacillus cereus VD146	Broad Institute	2537561847	Bacillota	Bacilli	Bacillales	Bacillaceae	Bacillus	Bacillus cereus	Yes	Yes	Environmental	Terrestrial	Unclassified	Soil	Unclassified	United Kingdom: Scotland		6059536	6224
2898347999	Bacteria	Permanent Draft	Caulobacter sp. 17J65-9 genome sequencing	Caulobacter sp. 17J65-9	Seoul Womens University	2898347999	Pseudomonadota	Alphaproteobacteria	Caulobacterales	Caulobacteraceae	Caulobacter	Caulobacter sp. 17J65-9	Yes	Yes	Environmental	Terrestrial	Unclassified	Soil	Unclassified	South Korea: Jeju		4188469	4485
2881576758	Bacteria	Permanent Draft	Caulobacter flavus CGMCC1 15093 genome sequencing	Variovorax sp. DXTD-1	Beijing Academy of Agriculture and Forestry Sciences	2881576758	Pseudomonadota	Betaproteobacteria	Burkholderiales	Comamonadaceae	Variovorax	Variovorax sp. DXTD-1	Yes	Yes	Environmental	Terrestrial	Unclassified	Soil	Unclassified	China: Inner Mongolia		5254730	5082
2648501662	Bacteria	Permanent Draft	Genome sequencing of soil and sea water bacteria from France	Priestia flexa Riq5	University of Malaya	2648501662	Bacillota	Bacilli	Bacillales	Bacillaceae	Priestia	Priestia flexa	Yes	Yes	Environmental	Terrestrial	Unclassified	Soil	Unclassified	Riquewhr		5639405	5894
2915036707	Bacteria	Permanent Draft	Genome Sequencing of Pontibacter sp. KCTC 32443	Pontibacter sp. KCTC 32443	Seoul Womens University	2915036707	Bacteroidota	Cytophagia	Cytophagales	Hymenobacteraceae	Pontibacter	Pontibacter sp. KCTC 32443	Yes	Yes	Environmental	Terrestrial	Unclassified	Soil	Unclassified	South Korea		4149974	3737
8051916664	Bacteria	Permanent Draft	Bacillus licheniformis MUST genome sequencing	Bacillus licheniformis MUST	Mirpur Univerisity of Science and Technology (MUST)	8051916664	Bacillota	Bacilli	Bacillales	Bacillaceae	Bacillus	Bacillus licheniformis	Yes	Yes	Environmental	Terrestrial	Unclassified	Soil	Unclassified	Pakistan		4208006	5458
2984867784	Bacteria	Finished	Mesorhizobia in Australia	Mesorhizobium sp. B2-8-5	Curtin University	2984867784	Pseudomonadota	Alphaproteobacteria	Hyphomicrobiales	Phyllobacteriaceae	Mesorhizobium	Mesorhizobium sp. B2-8-5	Yes	Yes	Environmental	Terrestrial	Unclassified	Soil	Unclassified	Australia: WA, Badgingarra		6463198	6416
2902037648	Bacteria	Permanent Draft	Bacteria Genome sequencing	Pedobacter sp. L105	Institute of Microbiology of the AS CR	2902037648	Bacteroidota	Sphingobacteriia	Sphingobacteriales	Sphingobacteriaceae	Pedobacter	Pedobacter sp. L105	Yes	Yes	Environmental	Terrestrial	Unclassified	Soil	Unclassified	Czech Republic		6394673	5740
3003687805	Bacteria	Permanent Draft	Whole genome sequences of Actinomycetes	Nocardia sp. 2 LPG-2	King Mongkuts University of Technology Thonburi	3003687805	Actinomycetota	Actinomycetes	Mycobacteriales	Nocardiaceae	Nocardia	Nocardia acididurans	Yes	Yes	Environmental	Terrestrial	Manure-fertilized	Soil	Unclassified	Thailand: Lampang		8382712	7938
2767802275	Bacteria	Permanent Draft	Analysing Pseudmonas diversity in wheat fields in United Kingdom	Pseudomonas sp. 37 R 15	JOHN INNES CENTRE, NORWICH, UK.	2767802275	Pseudomonadota	Gammaproteobacteria	Pseudomonadales	Pseudomonadaceae	Pseudomonas	Pseudomonas sp. 37 R 15	Yes	Yes	Environmental	Terrestrial	Unclassified	Soil	Unclassified			6312061	5827
2731957729	Bacteria	Permanent Draft	Nocardia genome sequencing - National Institute of Technology and Evaluation, Japan	Nocardia coubleae NBRC 108252	National Institute of Technology and Evaluation	2731957729	Actinomycetota	Actinomycetes	Mycobacteriales	Nocardiaceae	Nocardia	Nocardia coubleae	Yes	Yes	Environmental	Terrestrial	Unclassified	Soil	Contaminated	Kuwait	Oil fields, Soil	6618950	6170
2826621679	Bacteria	Permanent Draft	Large-scale bioinformatics analysis of Bacillus genomes	Bacillus pseudomycoides AFS037117	University of North Carolina, Chapel Hill	2826621679	Bacillota	Bacilli	Bacillales	Bacillaceae	Bacillus	Bacillus pseudomycoides	Yes	Yes	Environmental	Terrestrial	Unclassified	Soil	Unclassified	USA: Iowa		5884098	6387
8025545243	Bacteria	Permanent Draft	Actinobacteria from South African environments	Streptomyces swartbergensis HMC13	Cape Peninsula University of Technology	8025545243	Actinomycetota	Actinomycetes	Kitasatosporales	Streptomycetaceae	Streptomyces	Streptomyces swartbergensis	Yes	Yes	Environmental	Terrestrial	Garden	Soil	Unclassified	South Africa: Uniondale		9204779	9200
2866412304	Bacteria	Permanent Draft	Streptomyces sp. NEAU-SSA 1 Genome sequencing	Streptomyces sporangiiformans NEAU-SSA 1	Northeast Agricultural University	2866412304	Actinomycetota	Actinomycetes	Kitasatosporales	Streptomycetaceae	Streptomyces	Streptomyces sporangiiformans	Yes	Yes	Environmental	Terrestrial	Unclassified	Soil	Unclassified	China:Dengfeng		10364544	9598
2971288693	Bacteria	Permanent Draft	Sequencing as part of the GlobE Evolution project	Leptospira jelokensis 201702419	INRS - Institute Armand Frappier	2971288693	Spirochaetota	Spirochaetia	Leptospirales	Leptospiraceae	Leptospira	Leptospira jelokensis	Yes	Yes	Environmental	Terrestrial	Unclassified	Soil	Unclassified	Malaysia		4124627	3928
8085680291	Bacteria	Permanent Draft	Streptomyces sp. H27-H1 genome sequencing	Streptomyces sp. H27-H1	Ondokuz Mayis University	8085680291	Actinomycetota	Actinomycetes	Kitasatosporales	Streptomycetaceae	Streptomyces	Streptomyces sp. H27-H1	Yes	Yes	Environmental	Terrestrial	Unclassified	Soil	Unclassified	Antarctica: Horseshoe Island		8945399	8701
2808606704	Bacteria	Finished	Burkholderia Genome sequencing - Northern Arizona University	Burkholderia sp. MSMB0856	Northern Arizona University	2808606704	Pseudomonadota	Betaproteobacteria	Burkholderiales	Burkholderiaceae	Burkholderia	Burkholderia sp. MSMB0856	Yes	Yes	Environmental	Terrestrial	Unclassified	Soil	Unclassified	Australia: Tanami East, Northern Territory		7249502	6509
2881835490	Bacteria	Permanent Draft	Population genomics tropical Pseudomonas	Pseudomonas sp. B2(2017)	University of Sao Paulo	2881835490	Pseudomonadota	Gammaproteobacteria	Pseudomonadales	Pseudomonadaceae	Pseudomonas	Pseudomonas sp. B2(2017)	Yes	Yes	Environmental	Terrestrial	Loam	Soil	Agricultural soil	Brazil: Piracicaba, Sao Paulo		6253251	5713
2751186016	Bacteria	Permanent Draft	Burkholderia Genome sequencing - Northern Arizona University	Burkholderia territorii RF7-non_BP5	Northern Arizona University	2751186016	Pseudomonadota	Betaproteobacteria	Burkholderiales	Burkholderiaceae	Burkholderia	Burkholderia territorii	Yes	Yes	Environmental	Terrestrial	Unclassified	Soil	Unclassified	Thailand: Ubon, Trakam		6936961	6320
3004077472	Bacteria	Permanent Draft	Rhodococcus sp. CX	Rhodococcus sp. CX	Griffith University	3004077472	Actinomycetota	Actinomycetes	Mycobacteriales	Nocardiaceae	Rhodococcus	Rhodococcus sp. CX	Yes	Yes	Environmental	Terrestrial	Unclassified	Soil	Unclassified	Australia: Lytton, Queensland		6547864	6621
2844244140	Bacteria	Permanent Draft	Amycolatopsis Genome sequencing	Amycolatopsis ruanii 49.3e	Northumbria University	2844244140	Actinomycetota	Actinomycetes	Pseudonocardiales	Pseudonocardiaceae	Amycolatopsis	Amycolatopsis ruanii	Yes	Yes	Environmental	Terrestrial	Unclassified	Soil	Unclassified	Chile		7255338	7215
2648501644	Bacteria	Permanent Draft	Genome sequencing of soil and sea water bacteria from France	Pseudomonas syringae Riq4	University of Malaya	2648501644	Pseudomonadota	Gammaproteobacteria	Pseudomonadales	Pseudomonadaceae	Pseudomonas	Pseudomonas syringae	Yes	Yes	Environmental	Terrestrial	Unclassified	Soil	Unclassified	Riquewhr		6347349	5859
2907196573	Bacteria	Permanent Draft	Genome sequences of foodborne bacterial pathogens - FDA	Paenibacillus polymyxa CFSAN034342	Center for Food Safety and Applied Nutrition, FDA (FDA/CFSAN)	2907196573	Bacillota	Bacilli	Bacillales	Paenibacillaceae	Paenibacillus	Paenibacillus polymyxa	Yes	Yes	Environmental	Terrestrial	Unclassified	Soil	Agricultural land			5989581	5612
2903931270	Bacteria	Permanent Draft	Genome sequencing and assembly of bacteria from soil samples used in the long-term dormancy experiment	Rhodococcus sp. KBS0724	Indiana University	2903931270	Actinomycetota	Actinomycetes	Mycobacteriales	Nocardiaceae	Rhodococcus	Rhodococcus sp. KBS0724	Yes	Yes	Environmental	Terrestrial	Unclassified	Soil	Unclassified	USA: Hickory Corners, Michigan		7254422	6946
8008265905	Bacteria	Finished	Bacillus subtilis subtilis SMY genome sequencing	Bacillus subtilis subtilis SMY	University of Wisconsin	8008265905	Bacillota	Bacilli	Bacillales	Bacillaceae	Bacillus	Bacillus subtilis	Yes	Yes	Environmental	Terrestrial	Unclassified	Soil	Unclassified	New York	Soil	4212427	4484
3002783830	Bacteria	Finished	Genome Sequencing of Pseudonocardia sp. CGMCC 4.1532	Pseudonocardia petroleophila CGMCC 4.1532	Central South University of Forestry and Technology	3002783830	Actinomycetota	Actinomycetes	Pseudonocardiales	Pseudonocardiaceae	Pseudonocardia	Pseudonocardia petroleophila	Yes	Yes	Environmental	Terrestrial	Unclassified	Soil	Unclassified	China		6490139	6429
2619619300	Bacteria	Finished	Rhodococcus aetherivorans IcdP1	Rhodococcus aetherivorans IcdP1	Shanghai Majorbio Bio-pharm Technology Co.	2619619300	Actinomycetota	Actinomycetes	Mycobacteriales	Nocardiaceae	Rhodococcus	Rhodococcus aetherivorans	Yes	Yes	Environmental	Terrestrial	Unclassified	Soil	Unclassified	Beijing, China		5922748	5497
2995336563	Bacteria	Permanent Draft	Noviherbaspirillum pedocola DKR-6	Noviherbaspirillum pedocola DKR-6	Korea university	2995336563	Pseudomonadota	Betaproteobacteria	Burkholderiales	Oxalobacteraceae	Noviherbaspirillum	Noviherbaspirillum pedocola	Yes	Yes	Environmental	Terrestrial	Unclassified	Soil	Unclassified	South Korea		7239946	6808
2925621278	Bacteria	Finished	Bacillus sp. ms-22 genome sequencing	Bacillus sp. ms-22	Third Institute of Oceanography	2925621278	Bacillota	Bacilli	Bacillales	Bacillaceae	Bacillus	Bacillus sp. ms-22	Yes	Yes	Environmental	Terrestrial	Unclassified	Soil	Unclassified	China: Chiu-lung River		3629561	3913
2881801170	Bacteria	Permanent Draft	Population genomics tropical Pseudomonas	Pseudomonas sp. R38(2017)	University of Sao Paulo	2881801170	Pseudomonadota	Gammaproteobacteria	Pseudomonadales	Pseudomonadaceae	Pseudomonas	Pseudomonas sp. R38(2017)	Yes	Yes	Environmental	Terrestrial	Loam	Soil	Agricultural soil	Brazil: Piracicaba, Sao Paulo		6269811	5902
8074036076	Bacteria	Finished	Genome Sequencing ofPseudomonas campi S1-A32-2	Luteimonas sp. S4-F44	Leibniz Centre for Agricultural Landscape Research (ZALF)	8074036076	Pseudomonadota	Gammaproteobacteria	Xanthomonadales	Xanthomonadaceae	Luteimonas	Luteimonas sp. S4-F44	Yes	Yes	Environmental	Terrestrial	Grasslands	Soil	Unclassified	Germany: exploratory Schorfheide-Chorin		3685273	3364
2936468559	Bacteria	Finished	Complete Genome Sequences of Bacteria from Red Sea	Rossellomorea marisflavi Bac144	King Abdulaziz City for Science and Technology (KACST)	2936468559	Bacillota	Bacilli	Bacillales	Bacillaceae	Rossellomorea	Rossellomorea marisflavi	Yes	Yes	Environmental	Terrestrial	Garden	Soil	Unclassified	Saudi Arabia:Rabigh harbor lagoon		4591517	4701
2816332259	Bacteria	Permanent Draft	Burkholderia Genome sequencing - Northern Arizona University	Burkholderia vietnamiensis FL-7-3-30-S2-D0	Northern Arizona University	2816332259	Pseudomonadota	Betaproteobacteria	Burkholderiales	Burkholderiaceae	Burkholderia	Burkholderia vietnamiensis	Yes	Yes	Environmental	Terrestrial	Unclassified	Soil	Unclassified	USA: Florida		6510537	5805
2958152153	Bacteria	Permanent Draft	Mesorhizobia in Australia	Mesorhizobium sp. B2-3-13	Curtin University	2958152153	Pseudomonadota	Alphaproteobacteria	Hyphomicrobiales	Phyllobacteriaceae	Mesorhizobium	Mesorhizobium sp. B2-3-13	Yes	Yes	Environmental	Terrestrial	Unclassified	Soil	Unclassified	Australia: WA, Badgingarra		5843489	5853
2977302854	Bacteria	Finished	De novo sequencing of myxobacteria isolates	Pyxidicoccus parkwaysis SCPEA002	University of Mississippi	2977302854	Myxococcota	Myxococcia	Myxococcales	Myxococcaceae	Pyxidicoccus	Pyxidicoccus parkwaysis	Yes	Yes	Environmental	Terrestrial	Unclassified	Soil	Unclassified	USA: Tryon, SC		13211253	10431
2808606928	Bacteria	Permanent Draft	Burkholderia Genome sequencing - Northern Arizona University	Burkholderia ubonensis MSMB2112WGS	Northern Arizona University	2808606928	Pseudomonadota	Betaproteobacteria	Burkholderiales	Burkholderiaceae	Burkholderia	Burkholderia ubonensis	Yes	Yes	Environmental	Terrestrial	Unclassified	Soil	Unclassified	Australia: Tanami East, Northern Territory		7601305	6882
2862328301	Bacteria	Permanent Draft	Streptomyces antibioticus DSM 40234 genome sequencing and assembly	Streptomyces antibioticus DSM 40234	Bielefeld University	2862328301	Actinomycetota	Actinomycetes	Kitasatosporales	Streptomycetaceae	Streptomyces	Streptomyces antibioticus	Yes	Yes	Environmental	Terrestrial	Unclassified	Soil	Unclassified			10145887	9389
2997804358	Bacteria	Permanent Draft	Bacillus sp. MRMR6 genome sequencing	Bacillus sp. MRMR6	California State University, Fresno	2997804358	Bacillota	Bacilli	Bacillales	Bacillaceae	Bacillus	Bacillus sp. MRMR6	Yes	Yes	Environmental	Terrestrial	Garden	Soil	Unclassified	USA: Mendota, CA		5438354	5611
2890107581	Bacteria	Permanent Draft	Planococcus sp. NJC23 genome sequencing	Planococcus soli NJC23	Beijing Institute of Technology	2890107581	Bacillota	Bacilli	Bacillales	Planococcaceae	Planococcus	Planococcus soli	Yes	Yes	Environmental	Terrestrial	Unclassified	Soil	Unclassified			4186213	4277
2995351510	Bacteria	Permanent Draft	Noviherbaspirillum Genome sequencing and assembly	Noviherbaspirillum malthae CC-AFH3	Research Institute of Forest Ecology Environment and Protection	2995351510	Pseudomonadota	Betaproteobacteria	Burkholderiales	Oxalobacteraceae	Noviherbaspirillum	Noviherbaspirillum malthae	Yes	Yes	Environmental	Terrestrial	Unclassified	Soil	Unclassified	China: Tanwan		8210474	7913
2920707710	Bacteria	Permanent Draft	Genome Sequencing of Azospirillum sp. W712	Azospirillum sp. W712	State Key Laboratory for Conservation and Utilization of Bio-Resources in Yunnan	2920707710	Pseudomonadota	Alphaproteobacteria	Rhodospirillales	Azospirillaceae	Azospirillum	Azospirillum tabaci	Yes	Yes	Environmental	Terrestrial	Unclassified	Soil	Unclassified	China: Yunnan		6322916	5949
8048908880	Bacteria	Permanent Draft	Xenophilus arseniciresistens YW8 genome sequencing	Xenophilus arseniciresistens YW8	Shenzhen University	8048908880	Pseudomonadota	Betaproteobacteria	Burkholderiales	Comamonadaceae	Xenophilus	Xenophilus arseniciresistens	Yes	Yes	Environmental	Terrestrial	Agricultural land	Soil	Bulk soil		Agricultural soil	5017807	4643
2891201472	Bacteria	Permanent Draft	Bacteria Genome sequencing	Granulicella sp. L46	Institute of Microbiology of the AS CR	2891201472	Acidobacteriota	Terriglobia	Terriglobales	Acidobacteriaceae	Granulicella	Granulicella sp. L46	Yes	Yes	Environmental	Terrestrial	Unclassified	Soil	Unclassified	Czech Republic		5479411	4786
8038665169	Bacteria	Permanent Draft	Burkholderia Genome sequencing - Northern Arizona University	Burkholderia cepacia INT3-BP185	Northern Arizona University	8038665169	Pseudomonadota	Betaproteobacteria	Burkholderiales	Burkholderiaceae	Burkholderia	Burkholderia cepacia	Yes	Yes	Environmental	Terrestrial	Unclassified	Soil	Unclassified	Thailand: Ubon		8742154	8238
8038926262	Bacteria	Permanent Draft	Burkholderia Genome sequencing - Northern Arizona University	Burkholderia cepacia INT1-BP232	Northern Arizona University	8038926262	Pseudomonadota	Betaproteobacteria	Burkholderiales	Burkholderiaceae	Burkholderia	Burkholderia cepacia	Yes	Yes	Environmental	Terrestrial	Unclassified	Soil	Unclassified	Thailand: Ubon		8509381	7937
3001511710	Bacteria	Permanent Draft	Aromatoleum buckelii U120 genome sequencing	Aromatoleum toluvorans Td21	James Hutton Institute	3001511710	Pseudomonadota	Betaproteobacteria	Rhodocyclales	Rhodocyclaceae	Aromatoleum	Aromatoleum toluvorans	Yes	Yes	Environmental	Terrestrial	Unclassified	Soil	Unclassified	USA: Clinton County, Michigan		4797596	4581
2895563333	Bacteria	Permanent Draft	Genome sequencing of Acidithiobacillus ferrooxidans IO-2C	Acidithiobacillus ferrooxidans IO-2C	Texas A and M University	2895563333	Pseudomonadota	Acidithiobacillia	Acidithiobacillales	Acidithiobacillaceae	Acidithiobacillus	Acidithiobacillus ferrooxidans	Yes	Yes	Environmental	Terrestrial	Unclassified	Soil	Unclassified	USA: Texas		2716894	2891
2690315863	Bacteria	Permanent Draft	Streptomyces sp. WAC04657 genome sequencing	Streptomyces sp. WAC04657	University of Toronto	2690315863	Actinomycetota	Actinomycetes	Kitasatosporales	Streptomycetaceae	Streptomyces	Streptomyces sp. WAC04657	Yes	Yes	Environmental	Terrestrial	Unclassified	Soil	Unclassified			7761583	7062
2855052972	Bacteria	Permanent Draft	Paracoccus sp. WN007 genome sequencing	Paracoccus salipaludis WN007	Chinese Academy of Agricultural Sciences	2855052972	Pseudomonadota	Alphaproteobacteria	Rhodobacterales	Paracoccaceae	Paracoccus	Paracoccus salipaludis	Yes	Yes	Environmental	Terrestrial	Garden	Soil	Unclassified	China:Binhai, Tianjin		3674522	3742
2841141743	Bacteria	Finished	Dyella sp. M7H15-1 genome sequencing	Dyella sp. M7H15-1	Sun Yat-Sen University	2841141743	Pseudomonadota	Gammaproteobacteria	Xanthomonadales	Rhodanobacteraceae	Dyella	Dyella sp. M7H15-1	Yes	Yes	Environmental	Terrestrial	Forest	Soil	Unclassified	China: Guangdong Province		3523985	3394
2703719312	Bacteria	Permanent Draft	Clostridium beijerinckii strains Genome project- Goettingen Genomics Laboratory	Clostridium beijerinckii NRRL B-528	Goettingen Genomics Laboratory	2703719312	Bacillota	Clostridia	Eubacteriales	Clostridiaceae	Clostridium	Clostridium beijerinckii	Yes	Yes	Environmental	Terrestrial	Unclassified	Soil	Unclassified		Soil	6255488	5660
3005603320	Bacteria	Permanent Draft	Genome sequencing of free-living Bradyrhizobium	Bradyrhizobium manausense SZCCT0433	The Chinese University of Hong Kong	3005603320	Pseudomonadota	Alphaproteobacteria	Hyphomicrobiales	Nitrobacteraceae	Bradyrhizobium	Bradyrhizobium manausense	Yes	Yes	Environmental	Terrestrial	Unclassified	Soil	Unclassified	China: Shenzhen, Guangdong		6871711	6578
2788500222	Bacteria	Finished	Rouxiella sp. ERMR1:05 genome sequencing	Rahnella sikkimica ERMR1:05	CSIR-Institute of Himalayan Bioresource Technology	2788500222	Pseudomonadota	Gammaproteobacteria	Enterobacterales	Yersiniaceae	Rahnella	Rahnella sikkimica	Yes	Yes	Environmental	Terrestrial	Unclassified	Soil	Unclassified	India: West Sikkim, East Rathong Glacier		5530672	5204
2814123438	Bacteria	Permanent Draft	Burkholderia Genome sequencing - Northern Arizona University	Burkholderia vietnamiensis PC082	Northern Arizona University	2814123438	Pseudomonadota	Betaproteobacteria	Burkholderiales	Burkholderiaceae	Burkholderia	Burkholderia vietnamiensis	Yes	Yes	Environmental	Terrestrial	Unclassified	Soil	Unclassified			7288284	6705
2899323326	Bacteria	Permanent Draft	Amycolatopsis sp. CFH S0740 genome sequencing	Amycolatopsis sp. CFH S0740	Xinxiang Medical University	2899323326	Actinomycetota	Actinomycetes	Pseudonocardiales	Pseudonocardiaceae	Amycolatopsis	Amycolatopsis sp. CFH S0740	Yes	Yes	Environmental	Terrestrial	Unclassified	Soil	Unclassified	China: Henan		9841780	9350
2856626968	Bacteria	Permanent Draft	Sphaerisporangium album CCTCC AA 208026 genome sequencing	Sphaerisporangium album CCTCC AA 208026	Shanghai Jiao Tong University	2856626968	Actinomycetota	Actinomycetes	Streptosporangiales	Streptosporangiaceae	Sphaerisporangium	Sphaerisporangium album	Yes	Yes	Environmental	Terrestrial	Unclassified	Soil	Unclassified	China: Tianzi Mountain, Hunan		9305065	8309
2895025526	Bacteria	Permanent Draft	Whole-genome analyses of novel actinobacteria	Saccharopolyspora elongata 7K502	Ondokuz Mayis University	2895025526	Actinomycetota	Actinomycetes	Pseudonocardiales	Pseudonocardiaceae	Saccharopolyspora	Saccharopolyspora elongata	Yes	Yes	Environmental	Terrestrial	Unclassified	Soil	Unclassified	Turkmenistan: Mary		10298286	9645
8019416050	Bacteria	Finished	Genome sequencing of BoNT-producing Clostridia and closely related bacteria	Clostridium botulinum Su1036	Northern Arizona University	8019416050	Bacillota	Clostridia	Eubacteriales	Clostridiaceae	Clostridium	Clostridium botulinum	Yes	Yes	Environmental	Terrestrial	Unclassified	Soil	Unclassified	Argentina		4108310	4107
2890335426	Bacteria	Permanent Draft	single cell sequences from one soil sample	Planctomyces sp. SCGC AG-212-M04	Iowa State University	2890335426	Planctomycetota	Planctomycetia	Planctomycetales	Planctomycetaceae	Planctomyces	Planctomyces sp. SCGC AG-212-M04	No	Yes	Environmental	Terrestrial	Unclassified	Soil	Unclassified	USA: Maine		2314199	2082
8046618429	Bacteria	Permanent Draft	Paracandidimonas lactea Q2-2 genome sequencing	Paracandidimonas lactea Q2-2	Zhejiang sci-tech university	8046618429	Pseudomonadota	Betaproteobacteria	Burkholderiales	Alcaligenaceae	Paracandidimonas	Paracandidimonas lactea	Yes	Yes	Environmental	Terrestrial	Unclassified	Soil	Unclassified	China: Zhejiang	Soil	4135502	3863
2808606890	Bacteria	Permanent Draft	Burkholderia Genome sequencing - Northern Arizona University	Burkholderia ubonensis MSMB842WGS	Northern Arizona University	2808606890	Pseudomonadota	Betaproteobacteria	Burkholderiales	Burkholderiaceae	Burkholderia	Burkholderia ubonensis	Yes	Yes	Environmental	Terrestrial	Unclassified	Soil	Unclassified	Australia: Tanami East, Northern Territory		7576411	6833
2862008770	Bacteria	Permanent Draft	Identification of nitrile degrading organisms.	Rhodococcus erythropolis ACN1	Georg-August-University Goettingen, Genomic and Applied Microbiology, Goettingen Genomics Laboratory	2862008770	Actinomycetota	Actinomycetes	Mycobacteriales	Nocardiaceae	Rhodococcus	Rhodococcus erythropolis	Yes	Yes	Environmental	Terrestrial	Unclassified	Soil	Unclassified	Goettingen		7242355	6978
2893079116	Bacteria	Permanent Draft	Lentzea indica PSKA42 genome sequencing	Lentzea indica PSKA42	University of Calcutta	2893079116	Actinomycetota	Actinomycetes	Pseudonocardiales	Pseudonocardiaceae	Lentzea	Lentzea indica	Yes	Yes	Environmental	Terrestrial	Unclassified	Soil	Unclassified	India: Kashmir		9967719	10654
8064171327	Bacteria	Finished	Ruania halotolerans M4N3S171 genome sequencing	Ruania halotolerans M4N3S171	Inner Mongolia University	8064171327	Actinomycetota	Actinomycetes	Micrococcales	Ruaniaceae	Ruania	Ruania halotolerans	Yes	Yes	Environmental	Terrestrial	Unclassified	Soil	Unclassified	China: Inner Mongolia		4270413	3909
2630968796	Bacteria	Permanent Draft	Geobacillus sp. T6 Genome sequencing	Geobacillus sp. T6	National Agricultural Technology Institute (INTA)	2630968796	Bacillota	Bacilli	Bacillales	Bacillaceae	Geobacillus	Geobacillus sp. T6	Yes	Yes	Environmental	Terrestrial	Unclassified	Soil	Unclassified		Soil	3661358	3926
2684623095	Bacteria	Finished	Bacillus cereus genome sequencing project - LANL	Bacillus cereus ATCC 4342 Genome sequencing	Los Alamos National Laboratory	2684623095	Bacillota	Bacilli	Bacillales	Bacillaceae	Bacillus	Bacillus cereus	Yes	Yes	Environmental	Terrestrial	Unclassified	Soil	Agricultural land		Host, Soil	5306298	5484
8038998536	Bacteria	Permanent Draft	Burkholderia Genome sequencing - Northern Arizona University	Burkholderia cepacia MSMB1820	Northern Arizona University	8038998536	Pseudomonadota	Betaproteobacteria	Burkholderiales	Burkholderiaceae	Burkholderia	Burkholderia cepacia	Yes	Yes	Environmental	Terrestrial	Unclassified	Soil	Unclassified	Australia: Tanami East, Northern Territory		8276276	7715
2822064472	Bacteria	Permanent Draft	Large-scale bioinformatics analysis of Bacillus genomes	Bacillus toyonensis AFS067491	University of North Carolina, Chapel Hill	2822064472	Bacillota	Bacilli	Bacillales	Bacillaceae	Bacillus	Bacillus toyonensis	Yes	Yes	Environmental	Terrestrial	Unclassified	Soil	Unclassified	USA: North Carolina		5730822	6227
8008551450	Bacteria	Finished	Streptomyces clavuligerus ATCC 27064	Streptomyces clavuligerus ATCC 27064	John Innes Centre	8008551450	Actinomycetota	Actinomycetes	Kitasatosporales	Streptomycetaceae	Streptomyces	Streptomyces clavuligerus	Yes	Yes	Environmental	Terrestrial	Unclassified	Soil	Unclassified		Soil	8704802	7369
8077179974	Bacteria	Permanent Draft	Streptomyces sp. SHP 1-2 genome sequencing	Streptomyces sp. SHP 1-2	Helmholtz Centre for Infection Research	8077179974	Actinomycetota	Actinomycetes	Kitasatosporales	Streptomycetaceae	Streptomyces	Streptomyces sp. SHP 1-2	Yes	Yes	Environmental	Terrestrial	Unclassified	Soil	Unclassified	Indonesia: Enggano Island		7562765	6378
8046442102	Bacteria	Permanent Draft	Fundidesulfovibrio terrae SG127 genome sequencing	Fundidesulfovibrio terrae SG127	Fujian Agriculture and Forestry University	8046442102	Thermodesulfobacteriota	Desulfovibrionia	Desulfovibrionales	Desulfovibrionaceae	Fundidesulfovibrio	Fundidesulfovibrio terrae	Yes	Yes	Environmental	Terrestrial	Agricultural land	Soil	Unclassified	China		3904129	3592
3002745950	Bacteria	Permanent Draft	Analysis of the biochemical properties, biological activity and biotechnological potential of siderophores and biosurfactants produced by Antarctic psychrotolerant bacteria	Sporosarcina sp. ANT_H38	University of Warsaw	3002745950	Bacillota	Bacilli	Bacillales	Planococcaceae	Sporosarcina	Sporosarcina sp. ANT_H38	Yes	Yes	Environmental	Terrestrial	Unclassified	Soil	Oil-contaminated	Antarctica: King George Island, Admiralty Bay		4633094	4786
2968533115	Bacteria	Permanent Draft	Corynebacterium glutamicum SYPS-062 genome sequencing	corynebacterium glutamicum SYPS-062-33a	Jiangnan University	2968533115	Actinomycetota	Actinomycetes	Mycobacteriales	Corynebacteriaceae	Corynebacterium	Corynebacterium glutamicum	Yes	Yes	Environmental	Terrestrial	Unclassified	Soil	Unclassified	China: Jiangsu, Wuxi		3211995	3205
2891830296	Bacteria	Permanent Draft	Azotobacter chroococcum isscasi P205 genome sequencing	Azotobacter chroococcum isscasi P205	Chinese Academy of Sciences, Institute of Soil Science	2891830296	Pseudomonadota	Gammaproteobacteria	Pseudomonadales	Pseudomonadaceae	Azotobacter	Azotobacter chroococcum	Yes	Yes	Environmental	Terrestrial	Unclassified	Soil	Unclassified	China: Yanting		4644599	4368
2886977974	Bacteria	Permanent Draft	Exploration of biodiversity of actinomycetes in saline lakes	Diaminobutyricibacter tongyongensis NBRC 108724	Hebei North University	2886977974	Actinomycetota	Actinomycetes	Micrococcales	Microbacteriaceae	Diaminobutyricibacter	Diaminobutyricibacter tongyongensis	Yes	Yes	Environmental	Terrestrial	Unclassified	Soil	Unclassified			4052689	3967
2754412346	Bacteria	Permanent Draft	Burkholderia Genome sequencing - Northern Arizona University	Burkholderia territorii MSMB2156WGS	Northern Arizona University	2754412346	Pseudomonadota	Betaproteobacteria	Burkholderiales	Burkholderiaceae	Burkholderia	Burkholderia territorii	Yes	Yes	Environmental	Terrestrial	Unclassified	Soil	Unclassified	Australia: Tanami East, Northern Territory		6977595	6365
8042876485	Bacteria	Permanent Draft	Large-scale bioinformatics analysis of Bacillus genomes	Bacillus wiedmannii AFS086460	University of North Carolina, Chapel Hill	8042876485	Bacillota	Bacilli	Bacillales	Bacillaceae	Bacillus	Bacillus wiedmannii	Yes	Yes	Environmental	Terrestrial	Unclassified	Soil	Unclassified	USA: New York		5745429	6078
2995869302	Bacteria	Permanent Draft	Antarctic Hymenobacters from James Ross Island	Hymenobacter terrestris P5252	Masaryk University	2995869302	Bacteroidota	Cytophagia	Cytophagales	Hymenobacteraceae	Hymenobacter	Hymenobacter terrestris	Yes	Yes	Environmental	Terrestrial	Unclassified	Soil	Unclassified	Antarctica: James Ross Island, Crame Col		4180315	3823
2887395293	Bacteria	Permanent Draft	Sneathiella litorea DP05 genome sequencing	Sneathiella litorea DP05	Chung-Ang University	2887395293	Pseudomonadota	Alphaproteobacteria	Sneathiellales	Sneathiellaceae	Sneathiella	Sneathiella litorea	Yes	Yes	Environmental	Terrestrial	Sand	Soil	Unclassified	South Korea		3738919	3654
2987833373	Bacteria	Permanent Draft	Cronobacter sakazakii spice project	Cronobacter sakazakii LR702		2987833373	Pseudomonadota	Gammaproteobacteria	Enterobacterales	Enterobacteriaceae	Cronobacter	Cronobacter sakazakii	Yes	Yes	Environmental	Terrestrial	Unclassified	Soil	Unclassified			4648234	4537
2551306534	Bacteria	Permanent Draft	Clostridium arbusti SL206	Clostridium arbusti SL206	Korea Research Institute of Bioscience and Biotechnology	2551306534	Bacillota	Clostridia	Eubacteriales	Clostridiaceae	Clostridium	Clostridium arbusti	Yes	Yes	Environmental	Terrestrial	Unclassified	Soil	Unclassified	Daejeon, Republic of Korea	Soil	3969996	3801
2808606865	Bacteria	Permanent Draft	Burkholderia Genome sequencing - Northern Arizona University	Burkholderia ubonensis MSMB2058	Northern Arizona University	2808606865	Pseudomonadota	Betaproteobacteria	Burkholderiales	Burkholderiaceae	Burkholderia	Burkholderia ubonensis	Yes	Yes	Environmental	Terrestrial	Unclassified	Soil	Unclassified	Australia: Tanami East, Northern Territory		8232117	7506
3002274877	Bacteria	Permanent Draft	Dyella caseinilytica DHOB09 genome sequencing	Dyella flava DHOC52	Sun Yat-Sen University	3002274877	Pseudomonadota	Gammaproteobacteria	Xanthomonadales	Rhodanobacteraceae	Dyella	Dyella flava	Yes	Yes	Environmental	Terrestrial	Unclassified	Soil	Unclassified	China: Guangdong		4748678	4382
2895539578	Bacteria	Permanent Draft	Actinoplanes sp. TBRC 11911 genome sequencing	Actinoplanes sp. TBRC 11911	National Center for Genetic Engineering and Biotechnology (BIOTEC)	2895539578	Actinomycetota	Actinomycetes	Micromonosporales	Micromonosporaceae	Actinoplanes	Actinoplanes sp. TBRC 11911	Yes	Yes	Environmental	Terrestrial	Unclassified	Soil	Unclassified	Thailand: Nakhon Nayok		9656845	8871
8070753880	Bacteria	Permanent Draft	Genome Sequencing of Streptomyces sp. MNP-20	Streptomyces sp. MNP-20	ICGEB	8070753880	Actinomycetota	Actinomycetes	Kitasatosporales	Streptomycetaceae	Streptomyces	Streptomyces sp. MNP-20	Yes	Yes	Environmental	Terrestrial	Unclassified	Soil	Unclassified	India: Manas National Park of Assam		10568097	9149
2915353903	Bacteria	Permanent Draft	Genome Sequencing of Sporosarcina sp. BP05	Sporosarcina sp. BP05	International Medical University, IMU	2915353903	Bacillota	Bacilli	Bacillales	Planococcaceae	Sporosarcina	Sporosarcina sp. BP05	Yes	Yes	Environmental	Terrestrial	Unclassified	Soil	Unclassified	Antarctica: Berntsen Point		4033497	4230
2509601037	Bacteria	Permanent Draft	Chlorogloeopsis fritschii PCC 6912	Chlorogloeopsis fritschii PCC 6912	University of Edinburgh	2509601037	Cyanobacteriota	Cyanophyceae	Nostocales	Chlorogloeopsidaceae	Chlorogloeopsis	Chlorogloeopsis fritschii	Yes	Yes	Environmental	Terrestrial	Unclassified	Soil	Unclassified	Allahabad, India	Soil	7770568	6983
8042774124	Bacteria	Permanent Draft	Large-scale bioinformatics analysis of Bacillus genomes	Bacillus wiedmannii AFS078322	University of North Carolina, Chapel Hill	8042774124	Bacillota	Bacilli	Bacillales	Bacillaceae	Bacillus	Bacillus wiedmannii	Yes	Yes	Environmental	Terrestrial	Unclassified	Soil	Unclassified	USA: New York		5588196	6015
8085111479	Bacteria	Finished	Paenarthrobacter sp. OM7 genome sequencing	Paenarthrobacter sp. OM7	Inner Mongolia University	8085111479	Actinomycetota	Actinomycetes	Micrococcales	Micrococcaceae	Paenarthrobacter	Paenarthrobacter sp. OM7	Yes	Yes	Environmental	Terrestrial	Unclassified	Soil	Unclassified	China: Mu Us Sandy Land		4877801	4621
2884316459	Bacteria	Permanent Draft	Leisingera sp. JC1 genome sequencing	Leisingera sp. JC1	University of Connecticut	2884316459	Pseudomonadota	Alphaproteobacteria	Rhodobacterales	Roseobacteraceae	Leisingera	Leisingera sp. JC1	Yes	Yes	Environmental	Terrestrial	Sand	Soil	Unclassified	USA: Maunalua Bay, Oahu, Hawaii		5190966	5220
2989297217	Bacteria	Permanent Draft	Sinomonas albida LC13	Sinomonas albida LC13	Northeast Agricultural University	2989297217	Actinomycetota	Actinomycetes	Micrococcales	Micrococcaceae	Sinomonas	Sinomonas albida	Yes	Yes	Environmental	Terrestrial	Unclassified	Soil	Unclassified	Japan		3779885	3581
2826836699	Bacteria	Permanent Draft	Large-scale bioinformatics analysis of Bacillus genomes	Bacillus pseudomycoides AFS022493	University of North Carolina, Chapel Hill	2826836699	Bacillota	Bacilli	Bacillales	Bacillaceae	Bacillus	Bacillus pseudomycoides	Yes	Yes	Environmental	Terrestrial	Unclassified	Soil	Unclassified	USA: Iowa		5664897	6181
2995739769	Bacteria	Permanent Draft	Pseudoxanthomonas jiangsuensis DSM 22398 genome sequencing	Pseudoxanthomonas yeongjuensis DSM 18204	Bacterial Genomics and Evolution Laboratory, CSIR-Institute of Microbial Technology	2995739769	Pseudomonadota	Gammaproteobacteria	Xanthomonadales	Xanthomonadaceae	Pseudoxanthomonas	Pseudoxanthomonas yeongjuensis	Yes	Yes	Environmental	Terrestrial	Unclassified	Soil	Agricultural land	South Korea	Soil	3937172	3534
2847313313	Bacteria	Finished	Sphingomonas sp. C8-2 genome sequencing	Sphingomonas sp. C8-2	National Institute of Agricultural Science	2847313313	Pseudomonadota	Alphaproteobacteria	Sphingomonadales	Sphingomonadaceae	Sphingomonas	Sphingomonas sp. C8-2	Yes	Yes	Environmental	Terrestrial	Unclassified	Soil	Unclassified	South Korea: Chungju		5758785	5656
2808606947	Bacteria	Permanent Draft	Burkholderia Genome sequencing - Northern Arizona University	Burkholderia ubonensis MSMB2121WGS	Northern Arizona University	2808606947	Pseudomonadota	Betaproteobacteria	Burkholderiales	Burkholderiaceae	Burkholderia	Burkholderia ubonensis	Yes	Yes	Environmental	Terrestrial	Unclassified	Soil	Unclassified	Australia: Tanami East, Northern Territory		7428702	6737
2728369071	Bacteria	Permanent Draft	Aliiruegeria sabulilitoris strain:GJMS-35 Genome sequencing	Aliiruegeria sabulilitoris GJMS-35	Anhui University	2728369071	Pseudomonadota	Alphaproteobacteria	Rhodobacterales	Roseobacteraceae	Aliiruegeria	Aliiruegeria sabulilitoris	Yes	Yes	Environmental	Terrestrial	Sand	Soil	Unclassified	South Korea: Geoje Island		5298461	5047
2744054596	Bacteria	Permanent Draft	Microbulbifer flavimaris WRN-8 genome sequencing	Microbulbifer flavimaris WRN-8	Agricultural Culture Collection of China (ACCC), Institute of Agricultural Resources and Regional Planning, Chinese Academy of Agricultural Sciences	2744054596	Pseudomonadota	Gammaproteobacteria	Cellvibrionales	Microbulbiferaceae	Microbulbifer	Microbulbifer flavimaris	Yes	Yes	Environmental	Terrestrial	Garden	Soil	Unclassified	China: Tian Jin City		3637656	3217
8033764373	Bacteria	Permanent Draft	Streptomyces cinnamoneus ATCC 12686 genome sequencing	Streptomyces cinnamoneus ATCC 12686	University of Illinois, Urbana-Champaign	8033764373	Actinomycetota	Actinomycetes	Kitasatosporales	Streptomycetaceae	Streptomyces	Streptomyces cinnamoneus	Yes	Yes	Environmental	Terrestrial	Unclassified	Soil	Unclassified	USA		11006533	10803
2775506968	Bacteria	Finished	Gordonia sp. YC-JH1 genome sequencing	Gordonia sp. YC-JH1	Chinese Academy of Agricultural Sciences	2775506968	Actinomycetota	Actinomycetes	Mycobacteriales	Gordoniaceae	Gordonia	Gordonia sp. YC-JH1	Yes	Yes	Environmental	Terrestrial	Garden	Soil	Unclassified	China: Cangzhou		4193324	4034
2767802272	Bacteria	Permanent Draft	Comparative genomics	Pseudomonas sp. EGD-AKN5	National Environmental Engineering Research Institute, India	2767802272	Pseudomonadota	Gammaproteobacteria	Pseudomonadales	Pseudomonadaceae	Pseudomonas	Pseudomonas sp. EGD-AKN5	Yes	Yes	Environmental	Terrestrial	Unclassified	Soil	Agricultural land			7083533	6405
2925024407	Bacteria	Permanent Draft	Flavobacterium sp. MK4S-17 genome sequencing	Flavobacterium sp. MK4S-17	Zhejiang University	2925024407	Bacteroidota	Flavobacteriia	Flavobacteriales	Flavobacteriaceae	Flavobacterium	Flavobacterium sp. MK4S-17	Yes	Yes	Environmental	Terrestrial	Unclassified	Soil	Unclassified	China: near Kanas Lake		2951637	2799
2885871342	Bacteria	Permanent Draft	Population genomics tropical Pseudomonas	Pseudomonas sp. R29(2017)	University of Sao Paulo	2885871342	Pseudomonadota	Gammaproteobacteria	Pseudomonadales	Pseudomonadaceae	Pseudomonas	Pseudomonas sp. R29(2017)	Yes	Yes	Environmental	Terrestrial	Loam	Soil	Agricultural soil	Brazil: Piracicaba, Sao Paulo		6216968	5707
8074819195	Bacteria	Finished	Buttiauxella sp. WJP83 genome sequencing	Buttiauxella sp. WJP83	Zhejiang Agriculture and Forestry University	8074819195	Pseudomonadota	Gammaproteobacteria	Enterobacterales	Enterobacteriaceae	Buttiauxella	Buttiauxella sp. WJP83	Yes	Yes	Environmental	Terrestrial	Unclassified	Soil	Unclassified	China		4816551	4601
2891737540	Bacteria	Permanent Draft	Pseudarthrobacter sp. NamE5 genome sequencing	Pseudarthrobacter sp. NamE5	AUT University	2891737540	Actinomycetota	Actinomycetes	Micrococcales	Micrococcaceae	Pseudarthrobacter	Pseudarthrobacter sp. NamE5	Yes	Yes	Environmental	Terrestrial	Unclassified	Soil	Unclassified	Namibia		4058324	3973
2816332452	Bacteria	Finished	Complete Genome Sequences of Bacteria from Red Sea	Bacillus paralicheniformis Bac48	King Abdullah University of Science and Technology (KAUST)	2816332452	Bacillota	Bacilli	Bacillales	Bacillaceae	Bacillus	Bacillus paralicheniformis	Yes	Yes	Environmental	Terrestrial	Unclassified	Soil	Unclassified	Saudi Arabia: Rabigh harbor lagoon		4464381	4520
3003241519	Bacteria	Permanent Draft	Sphingobacterium hungaricum KB22	Sphingobacterium hungaricum KB22	Seqomics Ltd	3003241519	Bacteroidota	Sphingobacteriia	Sphingobacteriales	Sphingobacteriaceae	Sphingobacterium	Sphingobacterium hungaricum	Yes	Yes	Environmental	Terrestrial	Unclassified	Soil	Unclassified	Hungary		4056205	3707
2814123440	Bacteria	Permanent Draft	Burkholderia Genome sequencing - Northern Arizona University	Burkholderia vietnamiensis FL-2-3-10-S1-D7	Northern Arizona University	2814123440	Pseudomonadota	Betaproteobacteria	Burkholderiales	Burkholderiaceae	Burkholderia	Burkholderia vietnamiensis	Yes	Yes	Environmental	Terrestrial	Unclassified	Soil	Unclassified	USA: Brevard, Florida		6701708	5976
2687453174	Bacteria	Finished	Dokdonella koreensis DS-123 Genome sequencing	Dokdonella koreensis DS-123	Yonsei University	2687453174	Pseudomonadota	Gammaproteobacteria	Xanthomonadales	Rhodanobacteraceae	Dokdonella	Dokdonella koreensis	Yes	Yes	Environmental	Terrestrial	Unclassified	Soil	Unclassified	South Korea	Soil	4446619	3626
8067116514	Bacteria	Permanent Draft	Corallococcus exiguus Genome sequencing and assembly	Corallococcus exiguus AM006	Aberystwyth University	8067116514	Myxococcota	Myxococcia	Myxococcales	Myxococcaceae	Corallococcus	Corallococcus exiguus	Yes	Yes	Environmental	Terrestrial	Unclassified	Soil	Unclassified	United Kingdom: Aberystwyth		10589411	9024
2925057819	Bacteria	Permanent Draft	Rhodococcus sp. Q1 genome sequencing	Rhodococcus sp. Q1	University of Chicago/Argonne national Lab	2925057819	Actinomycetota	Actinomycetes	Mycobacteriales	Nocardiaceae	Rhodococcus	Rhodococcus sp. Q1	Yes	Yes	Environmental	Terrestrial	Unclassified	Soil	Unclassified	USA		4969798	4628
8002309604	Bacteria	Permanent Draft	Reyranella sp. MMS21-HV4-11 Genome sequencing	Paenarthrobacter sp. MMS21-TAE1-1	Chungnam National University	8002309604	Actinomycetota	Actinomycetes	Micrococcales	Micrococcaceae	Paenarthrobacter	Paenarthrobacter sp. MMS21-TAE1-1	Yes	Yes	Environmental	Terrestrial	Unclassified	Soil	Unclassified	South Korea: Taean-gun		5020099	4783
2899414267	Bacteria	Permanent Draft	Desulfovibrio sp. DS-1 genome sequencing	Desulfovibrio sp. DS-1	Nanjing Agricultural University	2899414267	Thermodesulfobacteriota	Desulfovibrionia	Desulfovibrionales	Desulfovibrionaceae	Desulfovibrio	Desulfovibrio sp. DS-1	Yes	Yes	Environmental	Terrestrial	Unclassified	Soil	Unclassified	China: Nanjing		4247797	3693
2502894011	Bacteria	Permanent Draft	Streptomyces clavuligerus ATCC 27064	Streptomyces clavuligerus ATCC 27064	Broad Institute	2502894011	Actinomycetota	Actinomycetes	Kitasatosporales	Streptomycetaceae	Streptomyces	Streptomyces clavuligerus	Yes	Yes	Environmental	Terrestrial	Unclassified	Soil	Unclassified		Soil	8404469	7801
8068491518	Bacteria	Permanent Draft	Massilia sp. R798 genome sequencing	Massilia sp. R798	Chung-Ang University	8068491518	Pseudomonadota	Betaproteobacteria	Burkholderiales	Oxalobacteraceae	Massilia	Massilia soli	Yes	Yes	Environmental	Terrestrial	Unclassified	Soil	Unclassified	South Korea		4990115	4671
2775507232	Bacteria	Permanent Draft	Large-scale bioinformatics analysis of Bacillus genomes	Bacillus pseudomycoides AFS018975	University of North Carolina, Chapel Hill	2775507232	Bacillota	Bacilli	Bacillales	Bacillaceae	Bacillus	Bacillus pseudomycoides	Yes	Yes	Environmental	Terrestrial	Unclassified	Soil	Unclassified	USA: New York		5287922	5445
2884429793	Bacteria	Permanent Draft	Dyella sp. DHOA06 genome sequencing	Dyella dinghuensis DHOA06	Sun Yat-Sen University	2884429793	Pseudomonadota	Gammaproteobacteria	Xanthomonadales	Rhodanobacteraceae	Dyella	Dyella dinghuensis	Yes	Yes	Environmental	Terrestrial	Unclassified	Soil	Unclassified	China: Guangdong Province, Dinghushan Biosphere Reserve forest		4218720	3836
2731957655	Bacteria	Permanent Draft	Lederbergia lentus NBRC 16444	Lederbergia lentus NBRC 16444	National Institute of Technology and Evaluation	2731957655	Bacillota	Bacilli	Bacillales	Bacillaceae	Lederbergia	Lederbergia lenta	Yes	Yes	Environmental	Terrestrial	Unclassified	Soil	Unclassified		Soil	4334336	4171
8038570970	Bacteria	Permanent Draft	Burkholderia Genome sequencing - Northern Arizona University	Burkholderia cepacia MSMB1906	Northern Arizona University	8038570970	Pseudomonadota	Betaproteobacteria	Burkholderiales	Burkholderiaceae	Burkholderia	Burkholderia cepacia	Yes	Yes	Environmental	Terrestrial	Unclassified	Soil	Unclassified	Australia: Tanami East, Northern Territory		8316182	7764
8045240222	Bacteria	Permanent Draft	Pseudomonas sp. Genome sequencing and assembly	Pseudomonas frederiksbergensis 38F7	Ohio State University	8045240222	Pseudomonadota	Gammaproteobacteria	Pseudomonadales	Pseudomonadaceae	Pseudomonas	Pseudomonas frederiksbergensis	Yes	Yes	Environmental	Terrestrial	Unclassified	Soil	Unclassified	USA		7135144	6488
2971375140	Bacteria	Permanent Draft	Paenibacillus sp. NEAU-GSW1 genome sequencing	Paenibacillus sp. NEAU-GSW1	school of life science	2971375140	Bacillota	Bacilli	Bacillales	Paenibacillaceae	Paenibacillus	Paenibacillus sp. NEAU-GSW1	Yes	Yes	Environmental	Terrestrial	Unclassified	Soil	Unclassified	China: Henan		5020612	4937
2844213936	Bacteria	Permanent Draft	Comamonas thiooxydans QT12 genome sequencing	Comamonas thiooxydans QT12	Qingdao Agriculture University	2844213936	Pseudomonadota	Betaproteobacteria	Burkholderiales	Comamonadaceae	Comamonas	Comamonas thiooxydans	Yes	Yes	Environmental	Terrestrial	Unclassified	Soil	Unclassified	China: Shandong, Qingdao		5980770	6603
2867512988	Bacteria	Permanent Draft	Kribbella capetownensis sp. nov. and Kribbella speibonae sp. nov.	Kribbella sp. YM55 SK5	University of Cape Town	2867512988	Actinomycetota	Actinomycetes	Propionibacteriales	Kribbellaceae	Kribbella	Kribbella speibonae	Yes	Yes	Environmental	Terrestrial	Unclassified	Soil	Unclassified	South Africa: Stellenbosch		8874969	8651
2808606844	Bacteria	Permanent Draft	Burkholderia Genome sequencing - Northern Arizona University	Burkholderia ubonensis MSMB2110WGS	Northern Arizona University	2808606844	Pseudomonadota	Betaproteobacteria	Burkholderiales	Burkholderiaceae	Burkholderia	Burkholderia ubonensis	Yes	Yes	Environmental	Terrestrial	Unclassified	Soil	Unclassified	Australia: Tanami East, Northern Territory		7183270	6425
8051747416	Bacteria	Permanent Draft	Large-scale bioinformatics analysis of Bacillus genomes	Bacillus pseudomycoides AFS074519	University of North Carolina, Chapel Hill	8051747416	Bacillota	Bacilli	Bacillales	Bacillaceae	Bacillus	Bacillus pseudomycoides	Yes	Yes	Environmental	Terrestrial	Unclassified	Soil	Unclassified	USA: Iowa		5841288	6373
2731957742	Bacteria	Permanent Draft	Nocardia genome sequencing - National Institute of Technology and Evaluation, Japan	Nocardia miyunensis NBRC 108239	National Institute of Technology and Evaluation	2731957742	Actinomycetota	Actinomycetes	Mycobacteriales	Nocardiaceae	Nocardia	Nocardia miyunensis	Yes	Yes	Environmental	Terrestrial	Temperate forest	Soil	Bulk soil	Miyun, Beijing	Soil	10512560	9662
2917802685	Bacteria	Finished	Streptomyces olivochromogenes Genome sequencing	Streptomyces sp. RLB1-9	Universite de Lorraine	2917802685	Actinomycetota	Actinomycetes	Kitasatosporales	Streptomycetaceae	Streptomyces	Streptomyces sp. RLB1-9	Yes	Yes	Environmental	Terrestrial	Unclassified	Soil	Unclassified	France: Montiers		12201201	11436
2636415409	Bacteria	Finished	Sphingopyxis fribergensis Kp5.2 Genome sequencing	Sphingopyxis fribergensis Kp5.2	Bielefeld University	2636415409	Pseudomonadota	Alphaproteobacteria	Sphingomonadales	Sphingomonadaceae	Sphingopyxis	Sphingopyxis fribergensis	Yes	Yes	Environmental	Terrestrial	Unclassified	Soil	Unclassified			5202172	4952
2873266570	Bacteria	Finished	Streptomyces sp. WAC00288 genome sequencing	Streptomyces sp. WAC00288	University of Toronto	2873266570	Actinomycetota	Actinomycetes	Kitasatosporales	Streptomycetaceae	Streptomyces	Streptomyces sp. WAC00288	Yes	Yes	Environmental	Terrestrial	Unclassified	Soil	Unclassified	Canada: Ancaster, Ontario		7852859	7202
2971420006	Bacteria	Permanent Draft	Genome Sequencing of Paenibacillus sp. CGMCC 1.16610	Paenibacillus sp. CGMCC 1.16610	WFCC-MRCEN World Data Centre for Microoganisms(WDCM)	2971420006	Bacillota	Bacilli	Bacillales	Paenibacillaceae	Paenibacillus	Paenibacillus sp. CGMCC 1.16610	Yes	Yes	Environmental	Terrestrial	Unclassified	Soil	Unclassified	China		8647010	8048
2811995187	Bacteria	Permanent Draft	Genome sequencing of Streptomyces type strains - USDA	Streptomyces niveus NRRL 2449	USDA/ARS/NCAUR	2811995187	Actinomycetota	Actinomycetes	Kitasatosporales	Streptomycetaceae	Streptomyces	Streptomyces niveus	Yes	Yes	Environmental	Terrestrial	Unclassified	Soil	Unclassified	USA		7982224	7919
2911799741	Bacteria	Finished	Genome Sequencing of Hymenobacter sp. BRD67	Hymenobacter sp. BRD67	Korea Atomic Energy Research Institute	2911799741	Bacteroidota	Cytophagia	Cytophagales	Hymenobacteraceae	Hymenobacter	Hymenobacter sp. BRD67	Yes	Yes	Environmental	Terrestrial	Unclassified	Soil	Unclassified	South Korea: Jeju Island		4697693	5059
2911107612	Bacteria	Permanent Draft	Genome Sequencing of Luteimonas salinisoli SJ-92	Luteimonas salinisoli SJ-92	Inner Mongolia University	2911107612	Pseudomonadota	Gammaproteobacteria	Xanthomonadales	Xanthomonadaceae	Luteimonas	Luteimonas salinisoli	Yes	Yes	Environmental	Terrestrial	Unclassified	Soil	Unclassified	China: Inner Mongolia		4524514	4087
2887034460	Bacteria	Permanent Draft	Terrilactibacillus laevilacticus SK5-6 genome sequencing	Terrilactibacillus laevilacticus SK5-6	Chulalongkorn University	2887034460	Bacillota	Bacilli	Bacillales	Bacillaceae	Terrilactibacillus	Terrilactibacillus laevilacticus	Yes	Yes	Environmental	Terrestrial	Unclassified	Soil	Unclassified	Thailand: Samutsakorn Province		3370458	3500
8075197380	Bacteria	Finished	Rossellomorea vietnamensis 151-6 genome sequencing	Rossellomorea vietnamensis 151-6	Chinese Academy of Agricultural Sciences	8075197380	Bacillota	Bacilli	Bacillales	Bacillaceae	Rossellomorea	Rossellomorea vietnamensis	Yes	Yes	Environmental	Terrestrial	Unclassified	Soil	Unclassified	China: Hunan		4597807	5176
2962060712	Bacteria	Permanent Draft	Enterobacter sp. Z1 Genome sequencing and assembly	Enterobacter sp. Z1	Huazhong Agricultural University	2962060712	Pseudomonadota	Gammaproteobacteria	Enterobacterales	Enterobacteriaceae	Enterobacter	Enterobacter sp. Z1	Yes	Yes	Environmental	Terrestrial	Unclassified	Soil	Unclassified	China: Hubei		5232990	5263
2808606931	Bacteria	Permanent Draft	Burkholderia Genome sequencing - Northern Arizona University	Burkholderia ubonensis MSMB2124WGS	Northern Arizona University	2808606931	Pseudomonadota	Betaproteobacteria	Burkholderiales	Burkholderiaceae	Burkholderia	Burkholderia ubonensis	Yes	Yes	Environmental	Terrestrial	Unclassified	Soil	Unclassified	Australia: Tanami East, Northern Territory		7388462	6618
8053371892	Bacteria	Draft	Geothrix alkalitolerans SG263 genome sequencing	Geothrix alkalitolerans SG263	Fujian Agriculture and Forestry University	8053371892	Acidobacteriota	Holophagae	Holophagales	Holophagaceae	Geothrix	Geothrix alkalitolerans	Yes	Yes	Environmental	Terrestrial	Agricultural land	Soil	Unclassified	China		3421064	3157
2885159071	Bacteria	Permanent Draft	Pedobacter frigiditerrae RP-1-13 genome sequencing	Pedobacter frigiditerrae RP-1-13	Kyonggi University	2885159071	Bacteroidota	Sphingobacteriia	Sphingobacteriales	Sphingobacteriaceae	Pedobacter	Pedobacter frigiditerrae	Yes	Yes	Environmental	Terrestrial	Unclassified	Soil	Unclassified	Norway: Svalbard		5810223	4971
2808606912	Bacteria	Permanent Draft	Burkholderia Genome sequencing - Northern Arizona University	Burkholderia ubonensis MSMB1517WGS	Northern Arizona University	2808606912	Pseudomonadota	Betaproteobacteria	Burkholderiales	Burkholderiaceae	Burkholderia	Burkholderia ubonensis	Yes	Yes	Environmental	Terrestrial	Unclassified	Soil	Unclassified	Australia: Tanami East, Northern Territory		7175941	6374
8002602805	Bacteria	Permanent Draft	Roseomonas soli LMG 31231 genome sequencing	Roseomonas soli LMG 31231	Ghent University	8002602805	Pseudomonadota	Alphaproteobacteria	Rhodospirillales	Acetobacteraceae	Neoroseomonas	Neoroseomonas soli	Yes	Yes	Environmental	Terrestrial	Unclassified	Soil	Unclassified	China		5245593	5248
8074259086	Bacteria	Finished	Diaphorobacter sp. JS3051	Diaphorobacter sp. JS3051	Shanghai Jiaotong Universitiy	8074259086	Pseudomonadota	Betaproteobacteria	Burkholderiales	Comamonadaceae	Diaphorobacter	Diaphorobacter sp. JS3051	Yes	Yes	Environmental	Terrestrial	Unclassified	Soil	Unclassified	Brazil		4613942	4533
2971280440	Bacteria	Permanent Draft	Sequencing as part of the GlobE Evolution project	Leptospira kanakyensis 201800294	INRS - Institute Armand Frappier	2971280440	Spirochaetota	Spirochaetia	Leptospirales	Leptospiraceae	Leptospira	Leptospira kanakyensis	Yes	Yes	Environmental	Terrestrial	Unclassified	Soil	Unclassified	New Caledonia		4182313	4030
2936479205	Bacteria	Finished	Bacillus coagulans R11 genome sequencing	Weizmannia coagulans R11	South China Agricultural University	2936479205	Bacillota	Bacilli	Bacillales	Bacillaceae	Heyndrickxia	Heyndrickxia coagulans	Yes	Yes	Environmental	Terrestrial	Contaminated	Soil	Unclassified	China: Yunnan		3602752	3644
2775507275	Bacteria	Finished	Burkholderia Genome sequencing - Northern Arizona University	Burkholderia savannae MSMB0852	Northern Arizona University	2775507275	Pseudomonadota	Betaproteobacteria	Burkholderiales	Burkholderiaceae	Burkholderia	Burkholderia savannae	Yes	Yes	Environmental	Terrestrial	Unclassified	Soil	Unclassified	Australia: Tanami East, Northern Territory		7081173	6141
2837455513	Bacteria	Permanent Draft	Phenylobacterium sp. LX32 genome sequencing	Phenylobacterium soli LX32	Huazhong Agricultural University	2837455513	Pseudomonadota	Alphaproteobacteria	Caulobacterales	Caulobacteraceae	Phenylobacterium	Phenylobacterium soli	Yes	Yes	Environmental	Terrestrial	Garden	Soil	Unclassified	China: Hunan		4024128	4101
2911111700	Bacteria	Permanent Draft	Genome Sequencing of Phyllobacterium pellucidum BT25	Phyllobacterium pellucidum BT25	Seoul Womens University	2911111700	Pseudomonadota	Alphaproteobacteria	Hyphomicrobiales	Phyllobacteriaceae	Phyllobacterium	Phyllobacterium pellucidum	Yes	Yes	Environmental	Terrestrial	Unclassified	Soil	Unclassified	South Korea: Pocheon		4660625	4686
8072649425	Bacteria	Finished	Horticoccus luteus KSB-15 genome sequencing	Horticoccus luteus KSB-15	National Institute of Agricultural Science	8072649425	Verrucomicrobiota	Opitutae	Opitutales	Opitutaceae	Horticoccus	Horticoccus luteus	Yes	Yes	Environmental	Terrestrial	Agricultural land	Soil	Unclassified	South Korea: Gyeongsan-si, Gyeongsangbuk-do		4320198	3483
2600255070	Bacteria	Permanent Draft	Comparative genomics of Burkholderia isolates - National Institute of Technology and Evaluation, Japan	Paraburkholderia ginsengisoli NBRC 100965	National Institute of Technology and Evaluation	2600255070	Pseudomonadota	Betaproteobacteria	Burkholderiales	Burkholderiaceae	Paraburkholderia	Paraburkholderia ginsengisoli	Yes	Yes	Environmental	Terrestrial	Garden	Soil	Unclassified	Daejeon, South Korea		6541887	5858
2802429642	Bacteria	Permanent Draft	Niastella koreensis DSM 17620 genome sequencing	Niastella koreensis DSM 17620	Huazhong Agricultural University (HZAU)	2802429642	Bacteroidota	Chitinophagia	Chitinophagales	Chitinophagaceae	Niastella	Niastella koreensis	Yes	Yes	Environmental	Terrestrial	Unclassified	Soil	Agricultural land	Yeongju region of Korea	Soil	8973266	7350
2836654805	Bacteria	Permanent Draft	Planococcus halotolerans SCU63 genome sequencing	Planococcus halotolerans SCU63	Sichuan University	2836654805	Bacillota	Bacilli	Bacillales	Planococcaceae	Planococcus	Planococcus halotolerans	Yes	Yes	Environmental	Terrestrial	Garden	Soil	Unclassified	China: Gansu province		3622698	3789
8046885588	Bacteria	Permanent Draft	Kibdelosporangium philippinense ATCC 49844 genome sequencing	Kibdelosporangium philippinense ATCC 49844	University of New Hampshire - Manchester	8046885588	Actinomycetota	Actinomycetes	Pseudonocardiales	Pseudonocardiaceae	Kibdelosporangium	Kibdelosporangium philippinense	Yes	Yes	Environmental	Terrestrial	Garden	Soil	Unclassified		Soil	12047807	11762
2922684009	Bacteria	Permanent Draft	Paenibacillus sp. LC-T2 genome sequencing	Paenibacillus sp. LC-T2	Lanzhou University	2922684009	Bacillota	Bacilli	Bacillales	Paenibacillaceae	Paenibacillus	Paenibacillus monticola	Yes	Yes	Environmental	Terrestrial	Unclassified	Soil	Unclassified	China		7082651	6415
2999761178	Bacteria	Permanent Draft	Thermohalobaculum xanthum M0105	Thermohalobaculum xanthum M0105	Guangxi Academy of Sciences	2999761178	Pseudomonadota	Alphaproteobacteria	Rhodobacterales	Paracoccaceae	Thermohalobaculum	Thermohalobaculum xanthum	Yes	Yes	Environmental	Terrestrial	Unclassified	Soil	Unclassified	China: Guangxi		4055176	3908
2995902960	Bacteria	Permanent Draft	Sphingopyxis solisilvae R366	Sphingopyxis solisilvae R366	ABI Group	2995902960	Pseudomonadota	Alphaproteobacteria	Sphingomonadales	Sphingomonadaceae	Sphingopyxis	Sphingopyxis solisilvae	Yes	Yes	Environmental	Terrestrial	Unclassified	Soil	Unclassified	South Korea: Kyonggi University, Suwon		3379576	3398
2791354921	Bacteria	Permanent Draft	Buttiauxella ferragutiae ATCC 51602 Genome sequencing	Buttiauxella ferragutiae ATCC 51602	University of Wisconsin	2791354921	Pseudomonadota	Gammaproteobacteria	Enterobacterales	Enterobacteriaceae	Buttiauxella	Buttiauxella ferragutiae	Yes	Yes	Environmental	Terrestrial	Garden	Soil	Unclassified		Soil	5079068	4759
2902767014	Bacteria	Permanent Draft	Paraburkholderia antibiotica G-4-1-8 genome sequencing	Paraburkholderia antibiotica G-4-1-8	Kyonggi University	2902767014	Pseudomonadota	Betaproteobacteria	Burkholderiales	Burkholderiaceae	Paraburkholderia	Paraburkholderia antibiotica	Yes	Yes	Environmental	Terrestrial	Unclassified	Soil	Unclassified	South Korea: Suwon		7444197	6715
8035332281	Bacteria	Permanent Draft	Pseudomonas reinekei MT1 genome sequencing	Pseudomonas reinekei MT1	Universidad Andres Bello	8035332281	Pseudomonadota	Gammaproteobacteria	Pseudomonadales	Pseudomonadaceae	Pseudomonas	Pseudomonas reinekei	Yes	Yes	Environmental	Terrestrial	Unclassified	Soil	Unclassified	Germany: Bitterfeld, Bitterfeld-Wolfen		6249573	5918
2636416112	Bacteria	Permanent Draft	Mumia flava MUSC 201 Genome sequencing	Mumia flava MUSC 201	University of Malaya	2636416112	Actinomycetota	Actinomycetes	Propionibacteriales	Nocardioidaceae	Mumia	Mumia flava	Yes	Yes	Environmental	Terrestrial	Mangrove soil	Soil	Unclassified	Tanjung Lumpur, Pahang, Malaysia		16377168	15815
2775507096	Bacteria	Permanent Draft	Streptomyces corchorusii DSM 40340 genome sequencing and assembly	Streptomyces corchorusii DSM 40340	Bielefeld University	2775507096	Actinomycetota	Actinomycetes	Kitasatosporales	Streptomycetaceae	Streptomyces	Streptomyces corchorusii	Yes	Yes	Environmental	Terrestrial	Unclassified	Soil	Unclassified	Arichola, near Dhaka	Soil	10271021	9229
2899342247	Bacteria	Permanent Draft	Amycolatopsis and Streptomyces type strains genome sequencing and assembly	Amycolatopsis acidiphila JCM 30562	Kasetsart University	2899342247	Actinomycetota	Actinomycetes	Pseudonocardiales	Pseudonocardiaceae	Amycolatopsis	Amycolatopsis acidiphila	Yes	Yes	Environmental	Terrestrial	Unclassified	Soil	Unclassified	Mongolia: Nalaikh coal mine		8076958	8208
2999330288	Bacteria	Permanent Draft	Exiguobacterium strain Genome sequencing	Exiguobacterium sp. s146	Chinese Academy of Sciences, Institute of Oceanology	2999330288	Bacillota	Bacilli	Bacillales	unclassified	Exiguobacterium	Exiguobacterium sp. s146	Yes	Yes	Environmental	Terrestrial	Unclassified	Soil	Unclassified	Pacific Ocean		2852803	3113
2814123237	Bacteria	Finished	Actinosynnema pretiosum X47 genome sequencing	Actinosynnema pretiosum X47	Shandong Academy of Medical Sciences	2814123237	Actinomycetota	Actinomycetes	Pseudonocardiales	Pseudonocardiaceae	Actinosynnema	Actinosynnema pretiosum	Yes	Yes	Environmental	Terrestrial	Unclassified	Soil	Unclassified	China: Shandong		8131572	7053
2808606862	Bacteria	Permanent Draft	Burkholderia Genome sequencing - Northern Arizona University	Burkholderia ubonensis MSMB1823	Northern Arizona University	2808606862	Pseudomonadota	Betaproteobacteria	Burkholderiales	Burkholderiaceae	Burkholderia	Burkholderia ubonensis	Yes	Yes	Environmental	Terrestrial	Unclassified	Soil	Unclassified	Australia: Tanami East, Northern Territory		7836647	7030
8045838998	Bacteria	Permanent Draft	Actinoallomurus sp. Genome sequencing	Actinomadura spadix KCTC 9252	Kasetsart University	8045838998	Actinomycetota	Actinomycetes	Streptosporangiales	Thermomonosporaceae	Actinoallomurus	Actinoallomurus spadix	Yes	Yes	Environmental	Terrestrial	Garden	Soil	Unclassified		Soil	8025068	7549
2806310750	Bacteria	Permanent Draft	Taxonomy and phylogenomics of Bacillus-like bacteria	Sutcliffiella horikoshii FJAT-14233	Fujian Academy of Agricultural Sciences	2806310750	Bacillota	Bacilli	Bacillales	Bacillaceae	Sutcliffiella	Sutcliffiella horikoshii	Yes	Yes	Environmental	Terrestrial	Unclassified	Soil	Unclassified			4263603	4415
2986417361	Bacteria	Permanent Draft	Sequencing as part of the Soil Listeria project	Listeria cossartiae cossartiae FSL L7-1435	Cornell University	2986417361	Bacillota	Bacilli	Bacillales	Listeriaceae	Listeria	Listeria cossartiae	Yes	Yes	Environmental	Terrestrial	Unclassified	Soil	Unclassified	USA: AL		2849065	3077
8003324323	Bacteria	Permanent Draft	Amycolatopsis sp. 195334CR genome sequencing	Amycolatopsis sp. 195334CR	Helmholtz Centre for Infection Research	8003324323	Actinomycetota	Actinomycetes	Pseudonocardiales	Pseudonocardiaceae	Amycolatopsis	Amycolatopsis sp. 195334CR	Yes	Yes	Environmental	Terrestrial	Unclassified	Soil	Unclassified	Indonesia: Bali		9926854	9403
8038942285	Bacteria	Permanent Draft	Burkholderia Genome sequencing - Northern Arizona University	Burkholderia cepacia INT3-BP157	Northern Arizona University	8038942285	Pseudomonadota	Betaproteobacteria	Burkholderiales	Burkholderiaceae	Burkholderia	Burkholderia cepacia	Yes	Yes	Environmental	Terrestrial	Unclassified	Soil	Unclassified	Thailand: Ubon		8737864	8239
2995877807	Bacteria	Permanent Draft	Hymenobacter negativus BT442	Hymenobacter negativus BT442	Seoul Womens University	2995877807	Bacteroidota	Cytophagia	Cytophagales	Hymenobacteraceae	Hymenobacter	Hymenobacter negativus	Yes	Yes	Environmental	Terrestrial	Unclassified	Soil	Unclassified	South Korea		5143362	4329
2936588853	Bacteria	Permanent Draft	Large-scale bioinformatics analysis of Bacillus genomes	Priestia megaterium AFS056967	University of North Carolina, Chapel Hill	2936588853	Bacillota	Bacilli	Bacillales	Bacillaceae	Priestia	Priestia megaterium	Yes	Yes	Environmental	Terrestrial	Unclassified	Soil	Unclassified	USA: Iowa		7057766	7778
2887950723	Bacteria	Finished	Amycolatopsis sp. Poz14 genome sequencing	Amycolatopsis sp. Poz14	Instituto Politecnico Nacional - ENCB	2887950723	Actinomycetota	Actinomycetes	Pseudonocardiales	Pseudonocardiaceae	Amycolatopsis	Amycolatopsis sp. Poz14	Yes	Yes	Environmental	Terrestrial	Unclassified	Soil	Unclassified	Mexico: Poza Rica, Veracruz		9395517	8883
2856844358	Bacteria	Finished	Sorangium cellulosum So ceGT47 genome sequencing	Sorangium cellulosum So ceGT47	Helmholtz Centre for Infection Research	2856844358	Myxococcota	unclassified	Polyangiales	Polyangiaceae	Sorangium	Sorangium cellulosum	Yes	Yes	Environmental	Terrestrial	Unclassified	Soil	Unclassified			11261481	8576
8068236155	Bacteria	Finished	Genome Sequencing ofPseudomonas campi S1-A32-2	Pseudoxanthomonas daejeonensis S9-A64R	Leibniz Centre for Agricultural Landscape Research (ZALF)	8068236155	Pseudomonadota	Gammaproteobacteria	Xanthomonadales	Xanthomonadaceae	Pseudoxanthomonas	Pseudoxanthomonas daejeonensis	Yes	Yes	Environmental	Terrestrial	Grasslands	Soil	Unclassified	Germany: exploratory Schorfheide-Chorin		3520644	3185
2791354873	Bacteria	Permanent Draft	SWI7 genome sequence	Pseudomonas sp. SWI7	University of Delaware	2791354873	Pseudomonadota	Gammaproteobacteria	Pseudomonadales	Pseudomonadaceae	Pseudomonas	unclassified	Yes	Yes	Environmental	Terrestrial	Unclassified	Soil	Unclassified	Bowling Green, Ohio		4931431	4580
2886225313	Bacteria	Permanent Draft	Population genomics tropical Pseudomonas	Pseudomonas sp. R47(2017)	University of Sao Paulo	2886225313	Pseudomonadota	Gammaproteobacteria	Pseudomonadales	Pseudomonadaceae	Pseudomonas	Pseudomonas sp. R47(2017)	Yes	Yes	Environmental	Terrestrial	Loam	Soil	Agricultural soil	Brazil: Piracicaba, Sao Paulo		6414159	5990
2848015127	Bacteria	Finished	Paenibacillus albus 18JY67-1 genome sequencing	Paenibacillus albus 18JY67-1	Seoul Womens University	2848015127	Bacillota	Bacilli	Bacillales	Paenibacillaceae	Paenibacillus	Paenibacillus albus	Yes	Yes	Environmental	Terrestrial	Unclassified	Soil	Unclassified	South Korea: Jeju Island		6632345	6262
2600254985	Bacteria	Permanent Draft	Escherichia coli DH5a Genome sequencing	Escherichia coli DH5a	Chinese Academy of Sciences	2600254985	Pseudomonadota	Gammaproteobacteria	Enterobacterales	Enterobacteriaceae	Escherichia	Escherichia coli	Yes	Yes	Environmental	Terrestrial	Unclassified	Soil	Unclassified	China, Beijing	Soil	4543825	4476
2910282092	Bacteria	Permanent Draft	Genome Sequencing of Echinicola salinicaeni P51	Echinicola salinicaeni P51	Shandong University	2910282092	Bacteroidota	Cytophagia	Cytophagales	Cyclobacteriaceae	Echinicola	Echinicola salinicaeni	Yes	Yes	Environmental	Terrestrial	Unclassified	Soil	Unclassified	China: Yantai		5139772	4264
2843147683	Bacteria	Finished	Gordonia alkanivorans YC-RL2 genome sequencing	Gordonia alkanivorans YC-RL2	Chinese Academy of Agricultural Sciences	2843147683	Actinomycetota	Actinomycetes	Mycobacteriales	Gordoniaceae	Gordonia	Gordonia alkanivorans	Yes	Yes	Environmental	Terrestrial	Garden	Soil	Unclassified	China: Heze City, Shandong Province		4979656	4641
2843237373	Bacteria	Finished	Sphingobium sp. LF-16 LF-16 genome sequencing	Sphingobium sp. LF-16 LF-16	Guangxi University	2843237373	Pseudomonadota	Alphaproteobacteria	Sphingomonadales	Sphingomonadaceae	Sphingobium	Sphingobium sp. LF-16	Yes	Yes	Environmental	Terrestrial	Unclassified	Soil	Unclassified			4572548	4433
8057498830	Bacteria	Permanent Draft	Paraliomyxa miuraensis SMH-27-4 genome sequencing	Paraliomyxa miuraensis SMH-27-4	Nagoya University	8057498830	Myxococcota	Myxococcia	Myxococcales	unclassified	Paraliomyxa	Paraliomyxa miuraensis	Yes	Yes	Environmental	Terrestrial	Unclassified	Soil	Unclassified	Japan: Arai-Hama, Miura Peninsula, Kanagawa		11848290	9424
8071480097	Bacteria	Permanent Draft	Whole-genome sequencing of Cupriavidus and Ralstonia type and reference strains	Cupriavidus campinensis LMG 19282	Ghent University	8071480097	Pseudomonadota	Betaproteobacteria	Burkholderiales	Burkholderiaceae	Cupriavidus	Cupriavidus campinensis	Yes	Yes	Environmental	Terrestrial	Unclassified	Soil	Unclassified			6103936	5760
8057707775	Bacteria	Permanent Draft	Micromonospora humidisoli MMS20-R2-29 genome sequencing	Micromonospora humidisoli MMS20-R2-29	Chungnam National University	8057707775	Actinomycetota	Actinomycetes	Micromonosporales	Micromonosporaceae	Micromonospora	Micromonospora humidisoli	Yes	Yes	Environmental	Terrestrial	Riverside	Soil	Unclassified	South Korea: Sejong-si		7129911	6328
2971362821	Bacteria	Permanent Draft	Paenibacillus mesophilus SYSU K30004 genome sequencing	Paenibacillus mesophilus SYSU K30004	Sun Yat-Sen University	2971362821	Bacillota	Bacilli	Bacillales	Paenibacillaceae	Paenibacillus	Paenibacillus mesophilus	Yes	Yes	Environmental	Terrestrial	Unclassified	Soil	Unclassified	China		8791003	7805
2571042717	Bacteria	Permanent Draft	Gordonia alkanivorans CGMCC 6845	Gordonia alkanivorans CGMCC 6845	Tianjin University	2571042717	Actinomycetota	Actinomycetes	Mycobacteriales	Gordoniaceae	Gordonia	Gordonia alkanivorans	Yes	Yes	Environmental	Terrestrial	Unclassified	Soil	Unclassified			5024931	4535
2908209870	Bacteria	Finished	Streptomyces sp. Tu 2975 genome sequencing	Streptomyces sp. Tu 2975	University of Tuebingen	2908209870	Actinomycetota	Actinomycetes	Kitasatosporales	Streptomycetaceae	Streptomyces	Streptomyces sp. Tu 2975	Yes	Yes	Environmental	Terrestrial	Unclassified	Soil	Unclassified			7623788	7215
2751186023	Bacteria	Permanent Draft	Burkholderia Genome sequencing - Northern Arizona University	Burkholderia sp. MSMB2157WGS	Northern Arizona University	2751186023	Pseudomonadota	Betaproteobacteria	Burkholderiales	Burkholderiaceae	Burkholderia	Burkholderia sp. MSMB2157WGS	Yes	Yes	Environmental	Terrestrial	Unclassified	Soil	Unclassified	Australia: Tanami East, Northern Territory		7068078	6383
2784132174	Bacteria	Permanent Draft	Genome-based Taxonomic Classification of Thermoactinomycetaceae	Risungbinella pyongyangensis CCTCC AA 2013021	Shanghai Majorbio Bio-pharm Technology Co.	2784132174	Bacillota	Bacilli	Bacillales	Thermoactinomycetaceae	Risungbinella	Risungbinella pyongyangensis	Yes	Yes	Environmental	Terrestrial	Unclassified	Soil	Agricultural land			3334434	3515
3004039960	Bacteria	Finished	Microbacterium sp. NY27	Microbacterium sp. NY27	Xiamen University	3004039960	Actinomycetota	Actinomycetes	Micrococcales	Microbacteriaceae	Microbacterium	Microbacterium cremeum	Yes	Yes	Environmental	Terrestrial	Unclassified	Soil	Unclassified	China: Changyi Tamarix forest marine ecological reserve		3982951	3572
8056308396	Bacteria	Permanent Draft	Aquibacillus salsiterrae 3ASR75-54 genome sequencing	Aquibacillus salsiterrae 3ASR75-54	University of Sevilla	8056308396	Bacillota	Bacilli	Bacillales	Bacillaceae	Aquibacillus	Aquibacillus salsiterrae	Yes	Yes	Environmental	Terrestrial	Unclassified	Soil	Unclassified	Spain: Marismas del Odiel, Huelva		3700068	3844
2866711008	Bacteria	Permanent Draft	Whole-genome analyses of novel actinobacteria	Micromonospora sp. 15K316	Ondokuz Mayis University	2866711008	Actinomycetota	Actinomycetes	Micromonosporales	Micromonosporaceae	Micromonospora	Micromonospora sp. 15K316	Yes	Yes	Environmental	Terrestrial	Sand	Soil	Desert	Turkmenistan: Askabat		6957401	6666
2718217994	Bacteria	Finished	Bacillus thuringiensis strain:YWC2-8 Genome sequencing and assembly	Bacillus thuringiensis sv. coreanensis ST7	Sichuan Agricultural University	2718217994	Bacillota	Bacilli	Bacillales	Bacillaceae	Bacillus	Bacillus thuringiensis	Yes	Yes	Environmental	Terrestrial	Unclassified	Soil	Unclassified	China: Sichuan Basin		6286121	6753
2994817734	Bacteria	Permanent Draft	Sporosalibacterium faouarense SOL3f37 genome sequencing	Sporosalibacterium faouarense SOL3f37	Zhejiang University	2994817734	Bacillota	Tissierellia	Tissierellales	Thermohalobacteraceae	Sporosalibacterium	Sporosalibacterium faouarense	Yes	Yes	Environmental	Terrestrial	Unclassified	Soil	Oil-contaminated	South Tunisia, Gbelli, El Faouar area	Soil	4119796	4178
8073576645	Bacteria	Permanent Draft	Pontibacter sp. BT310	Pontibacter sp. BT310	Seoul Womens University	8073576645	Bacteroidota	Cytophagia	Cytophagales	Hymenobacteraceae	Pontibacter	Pontibacter sp. BT310	Yes	Yes	Environmental	Terrestrial	Unclassified	Soil	Unclassified	South Korea: Uijeongbu		4294440	3750
3003518056	Bacteria	Permanent Draft	Salegentibacter sp. R32 genome sequencing	Pedobacter sp. SD-b	Kyungpook National University	3003518056	Bacteroidota	Sphingobacteriia	Sphingobacteriales	Sphingobacteriaceae	Pedobacter	Pedobacter segetis	Yes	Yes	Environmental	Terrestrial	Unclassified	Soil	Unclassified	South Korea		3842102	3439
2731957693	Bacteria	Permanent Draft	Mitsuaria chitosanitabida NBRC 102408	Mitsuaria chitosanitabida NBRC 102408	National Institute of Technology and Evaluation	2731957693	Pseudomonadota	Betaproteobacteria	Burkholderiales	Sphaerotilaceae	Roseateles	Roseateles chitosanitabidus	Yes	Yes	Environmental	Terrestrial	Garden	Soil	Unclassified	Matsue city, Japan		5818160	5124
2993971070	Bacteria	Permanent Draft	Genome sequencing to further insight into bacterial adaptation of environment and study on the phylogeny of them	Telluribacter humicola KCTC 42819	Sun Yat-Sen University	2993971070	Bacteroidota	Cytophagia	Cytophagales	Spirosomataceae	Telluribacter	Telluribacter humicola	Yes	Yes	Environmental	Terrestrial	Unclassified	Soil	Unclassified	South Korea: Ilsan		6559206	5713
2808606883	Bacteria	Permanent Draft	Burkholderia Genome sequencing - Northern Arizona University	Burkholderia ubonensis MSMB822WGS	Northern Arizona University	2808606883	Pseudomonadota	Betaproteobacteria	Burkholderiales	Burkholderiaceae	Burkholderia	Burkholderia ubonensis	Yes	Yes	Environmental	Terrestrial	Unclassified	Soil	Unclassified	Australia: Tanami East, Northern Territory		7778934	7055
2866557536	Bacteria	Permanent Draft	Georgenia sp. SYP-B2076 Genome sequencing	Georgenia sp. SYP-B2076	Shenyang Pharmaceutical University	2866557536	Actinomycetota	Actinomycetes	Micrococcales	Bogoriellaceae	Georgenia	Georgenia sp. SYP-B2076	Yes	Yes	Environmental	Terrestrial	Unclassified	Soil	Unclassified	China		4284448	3958
2907432789	Bacteria	Permanent Draft	Leptospira spp. from tropical soils.	Leptospira levettii CN6-C-A1	Institut Pasteur Montevideo	2907432789	Spirochaetota	Spirochaetia	Leptospirales	Leptospiraceae	Leptospira	Leptospira levettii	Yes	Yes	Environmental	Terrestrial	Unclassified	Soil	Unclassified	New Caledonia		3900982	3670
2885538475	Bacteria	Permanent Draft	Paenibacillus sp. PCH8 genome sequencing	Paenibacillus sp. PCH8	CSIR-IHBT PALAMPUR	2885538475	Bacillota	Bacilli	Bacillales	Paenibacillaceae	Paenibacillus	Paenibacillus sp. PCH8	Yes	Yes	Environmental	Terrestrial	Unclassified	Soil	Unclassified	India: Himachal Pradesh		6751460	6378
2744055073	Bacteria	Permanent Draft	Draft Genomes of Chromium Resistant Microbes	Microbacterium sp. K33	Cincinnati Childrens Hospital Medical Center	2744055073	Actinomycetota	Actinomycetes	Micrococcales	Microbacteriaceae	Microbacterium	Microbacterium sp. K33	Yes	Yes	Environmental	Terrestrial	Unclassified	Soil	Contaminated	Seymore, IN		3887677	3860
2903990366	Bacteria	Permanent Draft	Rhodococcus sp. NEAU-CX67 genome sequencing	Rhodococcus oryzae NEAU-CX67	college of life science	2903990366	Actinomycetota	Actinomycetes	Mycobacteriales	Nocardiaceae	Rhodococcus	Rhodococcus oryzae	Yes	Yes	Environmental	Terrestrial	Unclassified	Soil	Unclassified	China: Harbin		5365841	5101
2757320369	Bacteria	Finished	Genome sequencing project of PAHs degrading microbes	Idiomarina piscisalsi 10PY1A	Shins Lab., Kyungpook National University	2757320369	Pseudomonadota	Gammaproteobacteria	Alteromonadales	Idiomarinaceae	Idiomarina	Idiomarina piscisalsi	Yes	Yes	Environmental	Terrestrial	Sand	Soil	Oil-contaminated	Jubali, Saudi Arabia	Oil polluted soil	2587498	2481
2891592913	Bacteria	Permanent Draft	Pseudooceanicola sp. GBMRC 2024 genome sequencing	Pseudooceanicola sp. GBMRC 2024	Guangxi University of Chinese Medicine	2891592913	Pseudomonadota	Alphaproteobacteria	Rhodobacterales	Paracoccaceae	Pseudooceanicola	Pseudooceanicola albus	Yes	Yes	Environmental	Terrestrial	Unclassified	Soil	Unclassified	China: Guangxi		5508818	5284
8003338088	Bacteria	Permanent Draft	Acidovorax sp. CCYZU-2555 genome sequencing	Acidovorax sp. CCYZU-2555	Yangzhou University	8003338088	Pseudomonadota	Betaproteobacteria	Burkholderiales	Comamonadaceae	Acidovorax	Acidovorax sp. CCYZU-2555	Yes	Yes	Environmental	Terrestrial	Unclassified	Soil	Unclassified	China: Jiangsu Province, Yangzhou		5765020	5467
2890325768	Bacteria	Permanent Draft	Sediminibacterium soli WSJ-3 genome sequencing	Sediminibacterium soli WSJ-3	Huazhong Agricultural University	2890325768	Bacteroidota	Chitinophagia	Chitinophagales	Chitinophagaceae	Sediminibacterium	Sediminibacterium soli	Yes	Yes	Environmental	Terrestrial	Unclassified	Soil	Unclassified	China: Guizhou		3876070	3388
2999638648	Bacteria	Finished	Chitinophagaceae bacterium LGM1 Genome sequencing	Chitinophagaceae bacterium LGM1	Los Alamos National Laboratory	2999638648	Bacteroidota	Chitinophagia	Chitinophagales	Chitinophagaceae	unclassified	Chitinophagaceae bacterium LGM1	Yes	Yes	Environmental	Terrestrial	Garden	Soil	Unclassified	USA: AZ, Apache Junction		3322193	3146
2821904334	Bacteria	Permanent Draft	Large-scale bioinformatics analysis of Bacillus genomes	Bacillus toyonensis AFS058541	University of North Carolina, Chapel Hill	2821904334	Bacillota	Bacilli	Bacillales	Bacillaceae	Bacillus	Bacillus toyonensis	Yes	Yes	Environmental	Terrestrial	Unclassified	Soil	Unclassified	USA: New York		6035135	6713
647000211	Bacteria	Permanent Draft	Bacillus subtilis spizizenii ATCC 6633	Bacillus subtilis spizizenii ATCC 6633	University of Illinois, Urbana-Champaign	647000211	Bacillota	Bacilli	Bacillales	Bacillaceae	Bacillus	Bacillus spizizenii	Yes	Yes	Environmental	Terrestrial	Unclassified	Soil	Unclassified		Soil	3978576	4112
3006922447	Bacteria	Finished	Bacillus velezensis LB002 genome sequencing	Bacillus velezensis LB002	Nanjing Normal University	3006922447	Bacillota	Bacilli	Bacillales	Bacillaceae	Bacillus	Bacillus velezensis	Yes	Yes	Environmental	Terrestrial	Manure-fertilized	Soil	Unclassified	China: Nanjing		4076863	4220
2833560874	Bacteria	Permanent Draft	Desulfonatronum sp. SC1 genome sequencing	Desulfonatronum sp. SC1	University of Huddersfield	2833560874	Thermodesulfobacteriota	Desulfovibrionia	Desulfovibrionales	Desulfonatronaceae	Desulfonatronum	Desulfonatronum sp. SC1	Yes	Yes	Environmental	Terrestrial	Unclassified	Soil	Unclassified	United Kingdom		4164174	3957
2895555346	Bacteria	Permanent Draft	Devosia aurantiaca H239 genome sequencing	Devosia aurantiaca H239	Chung-Ang Univiersity	2895555346	Pseudomonadota	Alphaproteobacteria	Hyphomicrobiales	Devosiaceae	Devosia	Devosia aurantiaca	Yes	Yes	Environmental	Terrestrial	Unclassified	Soil	Unclassified	South Korea: Yeongwol		3692966	4323
8058484010	Bacteria	Permanent Draft	Paraburkholderia haematera LMG 31837 genome sequencing	Paraburkholderia nemoris LMG 22931	Ghent University	8058484010	Pseudomonadota	Betaproteobacteria	Burkholderiales	Burkholderiaceae	Paraburkholderia	Paraburkholderia nemoris	Yes	Yes	Environmental	Terrestrial	Unclassified	Soil	Unclassified			8642457	7957
2541047465	Bacteria	Permanent Draft	Corynebacterium glutamicum Z188	Corynebacterium glutamicum Z188	Chinese Academy of Sciences, Tianjin Institute of Industrial Biotechnology	2541047465	Actinomycetota	Actinomycetes	Mycobacteriales	Corynebacteriaceae	Corynebacterium	Corynebacterium glutamicum	Yes	Yes	Environmental	Terrestrial	Unclassified	Soil	Unclassified			3283833	3057
3002876416	Bacteria	Permanent Draft	Deinococcus sp. KSM4-11	Deinococcus sp. KSM4-11	Seoul Womens University	3002876416	Deinococcota	Deinococci	Deinococcales	Deinococcaceae	Deinococcus	Deinococcus sp. KSM4-11	Yes	Yes	Environmental	Terrestrial	Unclassified	Soil	Unclassified	South Korea: Seoul		4552127	4473
2936615734	Bacteria	Permanent Draft	Large-scale bioinformatics analysis of Bacillus genomes	Priestia megaterium AFS099045	University of North Carolina, Chapel Hill	2936615734	Bacillota	Bacilli	Bacillales	Bacillaceae	Priestia	Priestia megaterium	Yes	Yes	Environmental	Terrestrial	Unclassified	Soil	Unclassified	USA: Iowa		5990546	6497
3005564292	Bacteria	Permanent Draft	Genome sequencing of free-living Bradyrhizobium	Bradyrhizobium sp. AUGA SZCCT0283	The Chinese University of Hong Kong	3005564292	Pseudomonadota	Alphaproteobacteria	Hyphomicrobiales	Nitrobacteraceae	Bradyrhizobium	Bradyrhizobium sp. AUGA SZCCT0283	Yes	Yes	Environmental	Terrestrial	Unclassified	Soil	Unclassified	China: Lvliang, Shanxi		8068558	8029
2738541316	Bacteria	Finished	The evolution of family Rhizobiaceae	Allorhizobium pseudoryzae DSM 19479	Major Bio	2738541316	Pseudomonadota	Alphaproteobacteria	Hyphomicrobiales	Rhizobiaceae	Allorhizobium	Allorhizobium pseudoryzae	Yes	Yes	Environmental	Terrestrial	Unclassified	Soil	Unclassified	South Korea		7948293	7500
8052068929	Bacteria	Permanent Draft	Large-scale bioinformatics analysis of Bacillus genomes	Bacillus wiedmannii AFS023732	University of North Carolina, Chapel Hill	8052068929	Bacillota	Bacilli	Bacillales	Bacillaceae	Bacillus	Bacillus wiedmannii	Yes	Yes	Environmental	Terrestrial	Unclassified	Soil	Unclassified	USA: Iowa		5617898	6006
2995939082	Bacteria	Finished	Lysobacter helvus JCM32364 genome sequencing	Lysobacter helvus JCM32364	Japan Advanced Institute of Science and Technology	2995939082	Pseudomonadota	Gammaproteobacteria	Xanthomonadales	Xanthomonadaceae	Lysobacter	Lysobacter helvus	Yes	Yes	Environmental	Terrestrial	Unclassified	Soil	Unclassified	South Korea: Jeju		3270620	3211
3005165138	Bacteria	Permanent Draft	Genome sequencing of Enterobacter sp. R1(2018)	Enterobacter sp. R1(2018)	National Agricultural Technology Institute (INTA)	3005165138	Pseudomonadota	Gammaproteobacteria	Enterobacterales	Enterobacteriaceae	Enterobacter	Enterobacter sp. R1(2018)	Yes	Yes	Environmental	Terrestrial	Unclassified	Soil	Unclassified	Argentina: Misiones		4129641	4310
2989480425	Bacteria	Permanent Draft	Nocardiopsis quinghaiensis YIM 28A4	Nocardiopsis quinghaiensis YIM 28A4	Sun Yat-Sen University	2989480425	Actinomycetota	Actinomycetes	Streptosporangiales	Nocardiopsaceae	Nocardiopsis	Nocardiopsis quinghaiensis	Yes	Yes	Environmental	Terrestrial	Unclassified	Soil	Unclassified	China: Qinghai		5915607	5337
2880987659	Bacteria	Permanent Draft	Aquabacter cavernae Sn-9-2 genome sequencing	Aquabacter cavernae Sn-9-2	State Key Laboratory for Conservation and Utilization of Bio-Resources in Yunnan	2880987659	Pseudomonadota	Alphaproteobacteria	Hyphomicrobiales	Xanthobacteraceae	Aquabacter	Aquabacter cavernae	Yes	Yes	Environmental	Terrestrial	Unclassified	Soil	Unclassified	China: Guizhou		4516483	4083
2929512422	Bacteria	Finished	Screening of Streptomyces for novel antifungals	Streptomyces sp. BV410-1	Dresden University of Technology	2929512422	Actinomycetota	Actinomycetes	Kitasatosporales	Streptomycetaceae	Streptomyces	Streptomyces sp.	Yes	Yes	Environmental	Terrestrial	Unclassified	Soil	Unclassified	Zminjak, Serbia		9518315	8479
2908794071	Bacteria	Permanent Draft	Bacillus sp. SRB_8 genome sequencing	Rhodococcus sp. SRB_17	The New Zealand Institute for Plant and Food Research Limited	2908794071	Actinomycetota	Actinomycetes	Mycobacteriales	Nocardiaceae	Rhodococcus	Rhodococcus sp. SRB_17	Yes	Yes	Environmental	Terrestrial	Unclassified	Soil	Unclassified	New Zealand		11143299	11048
2767802274	Bacteria	Permanent Draft	Analysing Pseudmonas diversity in wheat fields in United Kingdom	Pseudomonas sp. 8 R 14	JOHN INNES CENTRE, NORWICH, UK.	2767802274	Pseudomonadota	Gammaproteobacteria	Pseudomonadales	Pseudomonadaceae	Pseudomonas	Pseudomonas sp. 8 R 14	Yes	Yes	Environmental	Terrestrial	Unclassified	Soil	Unclassified			6867364	6372
2902175717	Bacteria	Permanent Draft	Nocardioides sp. YIM 123512 genome sequencing	Nocardioides sp. YIM 123512	Yunnan Institute of Microbiology	2902175717	Actinomycetota	Actinomycetes	Propionibacteriales	Nocardioidaceae	Nocardioides	Nocardioides flavescens	Yes	Yes	Environmental	Terrestrial	Unclassified	Soil	Unclassified	China: Yunnan Province		4638605	4468
2862233620	Bacteria	Permanent Draft	Streptomyces triticisoli NEAU-DSCPA1-4-4 genome sequencing	Streptomyces triticisoli NEAU-DSCPA1-4-4	Northeast Agricultural University	2862233620	Actinomycetota	Actinomycetes	Kitasatosporales	Streptomycetaceae	Streptomyces	Streptomyces triticisoli	Yes	Yes	Environmental	Terrestrial	Unclassified	Soil	Unclassified	China: Jiaozuo		6844226	6706
2898716849	Bacteria	Permanent Draft	Burkholderia cordobensis LMG 27620 genome sequencing	Sphingobacterium alkalisoli Y3L14	Nanjing Agricultural University	2898716849	Bacteroidota	Sphingobacteriia	Sphingobacteriales	Sphingobacteriaceae	Sphingobacterium	Sphingobacterium alkalisoli	Yes	Yes	Environmental	Terrestrial	Unclassified	Soil	Unclassified	China: Inner Mongolia		5780041	4966
2775507097	Bacteria	Permanent Draft	Streptomyces olivochromogenes DSM 40451 genome sequencing and assembly	Streptomyces olivochromogenes DSM 40451	Bielefeld University	2775507097	Actinomycetota	Actinomycetes	Kitasatosporales	Streptomycetaceae	Streptomyces	Streptomyces olivochromogenes	Yes	Yes	Environmental	Terrestrial	Unclassified	Soil	Unclassified		Soil	11610340	10665
2775507234	Bacteria	Permanent Draft	Large-scale bioinformatics analysis of Bacillus genomes	Bacillus pseudomycoides AFS026857	University of North Carolina, Chapel Hill	2775507234	Bacillota	Bacilli	Bacillales	Bacillaceae	Bacillus	Bacillus pseudomycoides	Yes	Yes	Environmental	Terrestrial	Unclassified	Soil	Unclassified	USA: Iowa		5574162	5790
2684622590	Bacteria	Finished	Pseudomonas koreensis strain:D26 Genome sequencing and assembly	Pseudomonas koreensis D26	China National Rice Research Institute	2684622590	Pseudomonadota	Gammaproteobacteria	Pseudomonadales	Pseudomonadaceae	Pseudomonas	Pseudomonas koreensis	Yes	Yes	Environmental	Terrestrial	Unclassified	Soil	Unclassified	China: yunnan		6301761	5908
2866841126	Bacteria	Permanent Draft	Whole-genome analyses of novel actinobacteria	Actinomadura darangshiensis DSM 45941	Ondokuz Mayis University	2866841126	Actinomycetota	Actinomycetes	Streptosporangiales	Thermomonosporaceae	Actinomadura	Actinomadura darangshiensis	Yes	Yes	Environmental	Terrestrial	Unclassified	Soil	Unclassified			9886063	9772
2891492833	Bacteria	Permanent Draft	Glycomyces sp. NEAU-7082 genome sequencing	Glycomyces albidus NEAU-7082	Northeast Agricultural University	2891492833	Actinomycetota	Actinomycetes	Glycomycetales	Glycomycetaceae	Glycomyces	Glycomyces albidus	Yes	Yes	Environmental	Terrestrial	Unclassified	Soil	Unclassified	China: Hebei		5763264	5332
2911083444	Bacteria	Permanent Draft	Genome Sequencing of Microbispora sp. H10670	Microbispora sp. H10670	Sichuan Industrial Institute of Anotibioctics	2911083444	Actinomycetota	Actinomycetes	Streptosporangiales	Streptosporangiaceae	Microbispora	Microbispora sp. H10670	Yes	Yes	Environmental	Terrestrial	Unclassified	Soil	Unclassified	China: Hong Yuan		7982934	7170
2867248085	Bacteria	Permanent Draft	Arthrobacter sp. Genome sequencing	Arthrobacter sp. AQ5-05	Universiti Putra Malaysia	2867248085	Actinomycetota	Actinomycetes	Micrococcales	Micrococcaceae	Arthrobacter	Arthrobacter sp. AQ5-05	Yes	Yes	Environmental	Terrestrial	Unclassified	Soil	Unclassified	Antarctica: King George Island		4647352	4468
8055666059	Bacteria	Finished	Genome sequences of plant-beneficial Pseudomonas strains with biocontrol activity against lettuce bacterial pathogens	Pseudomonas canavaninivorans B21-020	Agriculture and Agri-Food Canada	8055666059	Pseudomonadota	Gammaproteobacteria	Pseudomonadales	Pseudomonadaceae	Pseudomonas	Pseudomonas canavaninivorans	Yes	Yes	Environmental	Terrestrial	Agricultural land	Soil	Unclassified	Canada: Ormstown, Quebec		6468924	5988
8052102528	Bacteria	Permanent Draft	Genome sequences of foodborne bacterial pathogens - FDA	Bacillus velezensis CFSAN034338	Center for Food Safety and Applied Nutrition, FDA (FDA/CFSAN)	8052102528	Bacillota	Bacilli	Bacillales	Bacillaceae	Bacillus	Bacillus velezensis	Yes	Yes	Environmental	Terrestrial	Unclassified	Soil	Agricultural land			4052005	4236
8008461808	Bacteria	Permanent Draft	Streptomyces sp. TRM70350 genome sequencing	Streptomyces sp. TRM70350	Tarim University	8008461808	Actinomycetota	Actinomycetes	Kitasatosporales	Streptomycetaceae	Streptomyces	Streptomyces sp. TRM70350	Yes	Yes	Environmental	Terrestrial	Sand	Soil	Unclassified	China: Tarim Basin, Xinjiang		8407572	7836
2961108598	Bacteria	Permanent Draft	Mesorhizobia in Australia	Mesorhizobium sp. B3-1-1	Curtin University	2961108598	Pseudomonadota	Alphaproteobacteria	Hyphomicrobiales	Phyllobacteriaceae	Mesorhizobium	Mesorhizobium sp. B3-1-1	Yes	Yes	Environmental	Terrestrial	Unclassified	Soil	Unclassified	Australia: WA, Badgingarra		6100005	6061
2740892356	Bacteria	Permanent Draft	Genomic characterisation of Clostridium difficile strains from northern Iraq	Clostridioides difficile CD105KSO10	University of Warwick	2740892356	Bacillota	Clostridia	Peptostreptococcales	Peptostreptococcaceae	Clostridioides	Clostridioides difficile	Yes	Yes	Environmental	Terrestrial	Unclassified	Soil	Unclassified			4203767	3917
2851212383	Bacteria	Permanent Draft	Brevibacillus Genome sequencing	Brevibacillus agri NRRL NRS 1219	USDA/ARS/NCAUR	2851212383	Bacillota	Bacilli	Bacillales	Paenibacillaceae	Brevibacillus	Brevibacillus agri	Yes	Yes	Environmental	Terrestrial	Unclassified	Soil	Unclassified	USA		5181360	5378
8050687846	Bacteria	Permanent Draft	Burkholderia Genome sequencing - Northern Arizona University	Burkholderia ubonensis MSMB1081WGS	Northern Arizona University	8050687846	Pseudomonadota	Betaproteobacteria	Burkholderiales	Burkholderiaceae	Burkholderia	Burkholderia ubonensis	Yes	Yes	Environmental	Terrestrial	Unclassified	Soil	Unclassified	Australia: Tanami East, Northern Territory		7249815	6758
2938590118	Bacteria	Permanent Draft	Leptospira spp. from tropical soils.	Leptospira macculloughii ATI2-C-A1	Institut Pasteur Montevideo	2938590118	Spirochaetota	Spirochaetia	Leptospirales	Leptospiraceae	Leptospira	Leptospira macculloughii	Yes	Yes	Environmental	Terrestrial	Unclassified	Soil	Unclassified	New Caledonia		6923300	6829
3003619556	Bacteria	Permanent Draft	Photobacterium arenosum CAU 1568	Photobacterium arenosum CAU 1568	Chung-Ang University	3003619556	Pseudomonadota	Gammaproteobacteria	Vibrionales	Vibrionaceae	Photobacterium	Photobacterium arenosum	Yes	Yes	Environmental	Terrestrial	Sand	Soil	Unclassified	South Korea		4775170	4530
2791354995	Bacteria	Permanent Draft	Genome sequencing of denitrifying bacteria isolated from neutral and low pH soil	Polaromonas sp. C04	Norwegian University of Life Sciences	2791354995	Pseudomonadota	Betaproteobacteria	Burkholderiales	Comamonadaceae	Polaromonas	Polaromonas sp. C04	Yes	Yes	Environmental	Terrestrial	Unclassified	Soil	Unclassified	Norway		4171197	3999
2865952614	Bacteria	Permanent Draft	Arthrobacter agilis isolate 4042 Genome sequencing	Arthrobacter agilis 4042	University of Applied Sciences of Western Switzerland	2865952614	Actinomycetota	Actinomycetes	Micrococcales	Micrococcaceae	Arthrobacter	Arthrobacter agilis	Yes	Yes	Environmental	Terrestrial	Unclassified	Soil	Agricultural land	France: Rabion, Noyant		3235327	3069
2808606842	Bacteria	Permanent Draft	Burkholderia Genome sequencing - Northern Arizona University	Burkholderia ubonensis MSMB2109WGS	Northern Arizona University	2808606842	Pseudomonadota	Betaproteobacteria	Burkholderiales	Burkholderiaceae	Burkholderia	Burkholderia ubonensis	Yes	Yes	Environmental	Terrestrial	Unclassified	Soil	Unclassified	Australia: Tanami East, Northern Territory		7684034	7014
2994613318	Bacteria	Permanent Draft	Streptomyces reference genome collection	Planotetraspora mira NBRC 15435	Biological Resource Center, National Institute of Technology and Evaluation (NBRC)	2994613318	Actinomycetota	Actinomycetes	Streptosporangiales	Streptosporangiaceae	Planotetraspora	Planotetraspora mira	Yes	Yes	Environmental	Terrestrial	Garden	Soil	Unclassified		Soil	9027692	8563
8072578248	Bacteria	Finished	Lysobacter sp. KIS68-7 genome sequencing	Lysobacter sp. KIS68-7	National Institute of Agricultural Science	8072578248	Pseudomonadota	Gammaproteobacteria	Xanthomonadales	Xanthomonadaceae	Lysobacter	Lysobacter sp. KIS68-7	Yes	Yes	Environmental	Terrestrial	Forest	Soil	Unclassified	South Korea: Gyeongsangnam-do, Tongyeong-si, Hansan-myeon, Bijindo		3251132	3166
2754412405	Bacteria	Permanent Draft	Burkholderia Genome sequencing - Northern Arizona University	Burkholderia stagnalis MSMB2168WGS	Northern Arizona University	2754412405	Pseudomonadota	Betaproteobacteria	Burkholderiales	Burkholderiaceae	Burkholderia	Burkholderia stagnalis	Yes	Yes	Environmental	Terrestrial	Unclassified	Soil	Unclassified	Australia: Tanami East, Northern Territory		7518564	6771
8071441674	Bacteria	Permanent Draft	Whole genome sequencing and assembly of denitrifying soil isolates	Pseudomonas sp. PDM09	University of Chicago	8071441674	Pseudomonadota	Gammaproteobacteria	Pseudomonadales	Pseudomonadaceae	Pseudomonas	Pseudomonas sp. PDM09	Yes	Yes	Environmental	Terrestrial	Unclassified	Soil	Unclassified	USA		6342093	5895
2915572380	Bacteria	Permanent Draft	Genome Sequencing of Brevibacillus sp. HB1.1	Brevibacillus sp. HB1.1	Nord Reet UG, Greifswald, Germany	2915572380	Bacillota	Bacilli	Bacillales	Paenibacillaceae	Brevibacillus	Brevibacillus sp. HB1.1	Yes	Yes	Environmental	Terrestrial	Unclassified	Soil	Unclassified	Viet Nam: Cao Phong, Hoa Binh		6317805	6195
2882772810	Bacteria	Permanent Draft	Oceanobacillus sp. Castelsardo genome sequencing	Oceanobacillus sp. Castelsardo	University of the Basque Country - UPV/EHU	2882772810	Bacillota	Bacilli	Bacillales	Bacillaceae	Oceanobacillus	Oceanobacillus sp. Castelsardo	Yes	Yes	Environmental	Terrestrial	Unclassified	Soil	Unclassified	Italy: Castelsardo		3715758	3941
2627854036	Bacteria	Permanent Draft	Bacillus subtilis spizizenii RFWG5B15	Bacillus subtilis spizizenii RFWG5B15	University of Virginia	2627854036	Bacillota	Bacilli	Bacillales	Bacillaceae	Bacillus	Bacillus spizizenii	Yes	Yes	Environmental	Terrestrial	Unclassified	Soil	Unclassified	Furnace Creek, CA	Soil	4006158	4132
2832736457	Bacteria	Permanent Draft	Genomes of Corallococcus strains isolated from Aberystwtyh and Carmarthen Areas United Kingdom	Corallococcus sp. AB030	Aberystwyth University	2832736457	Myxococcota	Myxococcia	Myxococcales	Myxococcaceae	Corallococcus	Corallococcus sp. AB030	Yes	Yes	Environmental	Terrestrial	Unclassified	Soil	Unclassified	United Kingdom		10635041	9017
8046284500	Bacteria	Permanent Draft	Scleromatobacter humisilvae BS-T2-15 genome sequencing	Scleromatobacter humisilvae BS-T2-15	Universite de Bretagne Occidentale	8046284500	Pseudomonadota	Betaproteobacteria	Burkholderiales	Sphaerotilaceae	Scleromatobacter	Scleromatobacter humisilvae	Yes	Yes	Environmental	Terrestrial	Forest	Soil	Unclassified	France		6273566	5839
2883663913	Bacteria	Permanent Draft	Emticicia agri 17J42-9 genome sequencing	Emticicia agri 17J42-9	Kyungpook National University	2883663913	Bacteroidota	Cytophagia	Cytophagales	Spirosomataceae	Emticicia	Emticicia agri	Yes	Yes	Environmental	Terrestrial	Unclassified	Soil	Unclassified	South Korea: Jeju Island		6650851	5790
3001626769	Bacteria	Finished	Psychrobacillus sp. INOP01 genome sequencing	Psychrobacillus sp. INOP01	Helmholtz Zentrum Munchen	3001626769	Bacillota	Bacilli	Bacillales	Bacillaceae	Psychrobacillus	Psychrobacillus sp. INOP01	Yes	Yes	Environmental	Terrestrial	Agricultural land	Soil	Unclassified	Germany: Rostock,Stover Acker		4301978	4456
2545824697	Bacteria	Permanent Draft	Gracilibacillus halophilus YIM-C55.5 Genome sequencing	Gracilibacillus halophilus YIM-C55.5	King Abdullah University of Science and Technology (KAUST)	2545824697	Bacillota	Bacilli	Bacillales	Bacillaceae	Gracilibacillus	Gracilibacillus halophilus	Yes	Yes	Environmental	Terrestrial	Unclassified	Soil	Unclassified	China, Xiaochaidamu salt lake, Qaidam Basin, Qinghai Province, north-west China.	Aquatic, Saline lake, Soil	3034425	2999
8038681320	Bacteria	Permanent Draft	Burkholderia Genome sequencing - Northern Arizona University	Burkholderia cepacia MSMB591WGS	Northern Arizona University	8038681320	Pseudomonadota	Betaproteobacteria	Burkholderiales	Burkholderiaceae	Burkholderia	Burkholderia cepacia	Yes	Yes	Environmental	Terrestrial	Unclassified	Soil	Unclassified	Australia: Tanami East, Northern Territory		8934814	8425
2754412315	Bacteria	Permanent Draft	Burkholderia Genome sequencing - Northern Arizona University	Burkholderia stagnalis MSMB845WGS	Northern Arizona University	2754412315	Pseudomonadota	Betaproteobacteria	Burkholderiales	Burkholderiaceae	Burkholderia	Burkholderia stagnalis	Yes	Yes	Environmental	Terrestrial	Unclassified	Soil	Unclassified	Australia: Tanami East, Northern Territory		7540332	6760
2597489808	Bacteria	Permanent Draft	Deinococcus humi MK03	Deinococcus humi MK03	Korea Atomic Energy Research Institute	2597489808	Deinococcota	Deinococci	Deinococcales	Deinococcaceae	Deinococcus	Deinococcus humi	Yes	Yes	Environmental	Terrestrial	Unclassified	Soil	Unclassified	Seoul, South Korea		5352971	5094
2894494502	Bacteria	Permanent Draft	new species of Sinirhodobacter isolated from plant Assembly	Pseudoclavibacter terrae THG-MD12	Research Institute of Forest Ecology Environment and Protection	2894494502	Actinomycetota	Actinomycetes	Micrococcales	Microbacteriaceae	Pseudoclavibacter	Pseudoclavibacter terrae	Yes	Yes	Environmental	Terrestrial	Unclassified	Soil	Unclassified	China		3912938	3647
8002792579	Bacteria	Permanent Draft	Devosia sp. BSSL-BM10 genome sequencing	Devosia litorisediminis BSSL-BM10	Sungkyunkwan University	8002792579	Pseudomonadota	Alphaproteobacteria	Hyphomicrobiales	Devosiaceae	Devosia	Devosia litorisediminis	Yes	Yes	Environmental	Terrestrial	Sand	Soil	Unclassified	South Korea: Boryeong		3743297	3689
2922124256	Bacteria	Permanent Draft	Genome sequencing of Mesorhizobium loti LU	Mesorhizobium loti LU	Loyola University Chicago	2922124256	Pseudomonadota	Alphaproteobacteria	Hyphomicrobiales	Phyllobacteriaceae	Mesorhizobium	Mesorhizobium loti	Yes	Yes	Environmental	Terrestrial	Unclassified	Soil	Unclassified	USA: Glenview, IL		6399828	6234
8031746864	Bacteria	Permanent Draft	Sequencing as part of the Soil Listeria project	Listeria immobilis FSL L7-1519	Cornell University	8031746864	Bacillota	Bacilli	Bacillales	Listeriaceae	Listeria	Listeria immobilis	Yes	Yes	Environmental	Terrestrial	Unclassified	Soil	Unclassified	USA: WY		3063968	3242
2999740256	Bacteria	Permanent Draft	Arenibacterium arenosum CAU 1593	Arenibacterium arenosum CAU 1593	Chung-Ang University	2999740256	Pseudomonadota	Alphaproteobacteria	Rhodobacterales	Paracoccaceae	Arenibacterium	Arenibacterium arenosum	Yes	Yes	Environmental	Terrestrial	Sand	Soil	Unclassified	South Korea		3979826	3927
2879605072	Bacteria	Permanent Draft	Leptospira spp. from tropical soils.	Leptospira hartskeerlii MCA1-C-A1	Institut Pasteur Montevideo	2879605072	Spirochaetota	Spirochaetia	Leptospirales	Leptospiraceae	Leptospira	Leptospira hartskeerlii	Yes	Yes	Environmental	Terrestrial	Unclassified	Soil	Unclassified	New Caledonia		4048089	3772
8053069135	Bacteria	Permanent Draft	Staphylococcus saprophyticus AG1 Genome sequencing	Staphylococcus saprophyticus AG1	Vilnius University	8053069135	Bacillota	Bacilli	Bacillales	Staphylococcaceae	Staphylococcus	Staphylococcus saprophyticus	Yes	Yes	Environmental	Terrestrial	Unclassified	Soil	Unclassified	Lithuania: Vilnius		2595522	2704
2821672299	Bacteria	Permanent Draft	Picher, OK, Soil Microbes	Methylobacterium sp. EM09	The Sequencing Center (Fort Collins)	2821672299	Pseudomonadota	Alphaproteobacteria	Hyphomicrobiales	Methylobacteriaceae	Methylobacterium	unclassified	Yes	Yes	Environmental	Terrestrial	Unclassified	Soil	Unclassified			5929852	5838
8067292203	Bacteria	Finished	Saccharopolyspora pogona NRRL30141	Saccharopolyspora pogona NRRL30141	Hunan Normal University	8067292203	Actinomycetota	Actinomycetes	Pseudonocardiales	Pseudonocardiaceae	Saccharopolyspora	Saccharopolyspora pogona	Yes	Yes	Environmental	Terrestrial	Unclassified	Soil	Unclassified	USA: Indiana		9608180	9640
2740892438	Bacteria	Permanent Draft	Genome sequencing of Staphyloccus and Enterococcus isolates	Enterococcus faecium CICYT-205	Technical University of Denmark	2740892438	Bacillota	Bacilli	Lactobacillales	Enterococcaceae	Enterococcus	Enterococcus faecium	Yes	Yes	Environmental	Terrestrial	Unclassified	Soil	Farm			2626460	2604
2833762738	Bacteria	Permanent Draft	Corallococcus sp. H22C18031201 Genome sequencing	Corallococcus sp. H22C18031201	Guangdong Institute of Microbiology	2833762738	Myxococcota	Myxococcia	Myxococcales	Myxococcaceae	Corallococcus	Corallococcus sp. H22C18031201	Yes	Yes	Environmental	Terrestrial	Temperate forest	Soil	Bulk soil	China: Guangdong Province, Dinghushan Biosphere Reserve		9069515	7440
2751186029	Bacteria	Finished	Burkholderia Genome sequencing - Northern Arizona University	Burkholderia seminalis FL-5-4-10-S1-D7	Northern Arizona University	2751186029	Pseudomonadota	Betaproteobacteria	Burkholderiales	Burkholderiaceae	Burkholderia	Burkholderia seminalis	Yes	Yes	Environmental	Terrestrial	Unclassified	Soil	Unclassified	USA: Florida		7648944	6935
8023340923	Bacteria	Permanent Draft	Bacillus sp. AR2-1 genome sequencing	Bacillus sp. AR2-1	University of Bialystok	8023340923	Bacillota	Bacilli	Bacillales	Bacillaceae	Bacillus	Bacillus sp. AR2-1	Yes	Yes	Environmental	Terrestrial	Unclassified	Soil	Unclassified	Argentina: Buenos Aires, a tawn park		6117091	6398
2925732014	Bacteria	Finished	Pseudomonas sp. NIBRBAC000502773 genome sequencing	Pseudomonas sp. NIBRBAC000502773	Genetic Resources Bank	2925732014	Pseudomonadota	Gammaproteobacteria	Pseudomonadales	Pseudomonadaceae	Pseudomonas	Pseudomonas sp. NIBRBAC000502773	Yes	Yes	Environmental	Terrestrial	Unclassified	Soil	Unclassified	South Korea: Gangwon-do		6712511	6218
8055129756	Bacteria	Finished	Geomonas sp. RG2 genome sequencing	Geomonas paludis RG22	Fujian Academy of Agricultural Sciences	8055129756	Thermodesulfobacteriota	Desulfuromonadia	Geobacterales	Geobacteraceae	Geomonas	Geomonas paludis	Yes	Yes	Environmental	Terrestrial	Unclassified	Soil	Unclassified	China: Fujian		5241294	4508
8039532677	Bacteria	Permanent Draft	Genome sequencing as part of FDA-ARGOS: dAtabase for Regulatory Grade micrObial Sequences project	Burkholderia thailandensis FDAARGOS_244	Institute for Genome Sciences, University of Maryland School of Medicine, U.S. Food and Drug Administration (FDA)	8039532677	Pseudomonadota	Betaproteobacteria	Burkholderiales	Burkholderiaceae	Burkholderia	Burkholderia thailandensis	Yes	Yes	Environmental	Terrestrial	Paddy field/soil	Soil	Unclassified	Thailand		6706700	5968
2744054597	Bacteria	Permanent Draft	Guyparkeria sp. WRN-7 genome sequencing	Guyparkeria sp. WRN-7	Agricultural Culture Collection of China (ACCC), Institute of Agricultural Resources and Regional Planning, Chinese Academy of Agricultural Sciences	2744054597	Pseudomonadota	Gammaproteobacteria	Chromatiales	Thioalkalibacteraceae	Guyparkeria	Guyparkeria sp. WRN-7	Yes	Yes	Environmental	Terrestrial	Garden	Soil	Unclassified	China: Tian Jin City		2291306	2133
2888181661	Bacteria	Finished	Halomonas socia CKY01 genome sequencing	Halomonas socia CKY01	Konkuk University	2888181661	Pseudomonadota	Gammaproteobacteria	Oceanospirillales	Halomonadaceae	Halomonas	Halomonas socia	Yes	Yes	Environmental	Terrestrial	Unclassified	Soil	Unclassified	South Korea		4753299	4672
8004471951	Bacteria	Permanent Draft	Mesorhizobia in Australia	Mesorhizobium sp. B2-4-12	Curtin University	8004471951	Pseudomonadota	Alphaproteobacteria	Hyphomicrobiales	Phyllobacteriaceae	Mesorhizobium	Mesorhizobium sp. B2-4-12	Yes	Yes	Environmental	Terrestrial	Unclassified	Soil	Unclassified	Australia: WA, Badgingarra		5696819	5630
2866658371	Bacteria	Permanent Draft	Whole-genome analyses of novel actinobacteria	Micromonospora sp. KC721	Ondokuz Mayis University	2866658371	Actinomycetota	Actinomycetes	Micromonosporales	Micromonosporaceae	Micromonospora	Micromonospora sp. KC721	Yes	Yes	Environmental	Terrestrial	Sand	Soil	Desert	Turkmenistan: Darvaz		6461179	6394
8064619003	Bacteria	Permanent Draft	Catenulispora pinisilvae NF3	Catenulispora pinistramenti NF23	Nicolaus Copernicus University	8064619003	Actinomycetota	Actinomycetes	Catenulisporales	Catenulisporaceae	Catenulispora	Catenulispora pinistramenti	Yes	Yes	Environmental	Terrestrial	Unclassified	Soil	Unclassified	Poland		10824067	9726
2808606864	Bacteria	Permanent Draft	Burkholderia Genome sequencing - Northern Arizona University	Burkholderia ubonensis MSMB1757	Northern Arizona University	2808606864	Pseudomonadota	Betaproteobacteria	Burkholderiales	Burkholderiaceae	Burkholderia	Burkholderia ubonensis	Yes	Yes	Environmental	Terrestrial	Unclassified	Soil	Unclassified			7699077	6982
8077723329	Bacteria	Permanent Draft	Phyllobacterium soli sp nov, a novel species with multifarious activities	Phyllobacterium sp. 0TCS1.6C	University of Salamanca	8077723329	Pseudomonadota	Alphaproteobacteria	Hyphomicrobiales	Phyllobacteriaceae	Phyllobacterium	Phyllobacterium sp. 0TCS1.6C	Yes	Yes	Environmental	Terrestrial	Unclassified	Soil	Unclassified	Spain: Castile and Leon, Matanza		4356368	4251
2869329445	Bacteria	Permanent Draft	Arthrobacter sp. NEAU-SA1 genome sequencing	Arthrobacter silvisoli NEAU-SA1	Northeast Agricultural University	2869329445	Actinomycetota	Actinomycetes	Micrococcales	Micrococcaceae	Arthrobacter	Arthrobacter silvisoli	Yes	Yes	Environmental	Terrestrial	Unclassified	Soil	Unclassified	China:Zhangjiajie		4349678	4067
8011043706	Bacteria	Finished	Genome sequencing and assembly of bacteria from soil samples used in the long-term dormancy experiment	Pseudomonas sp. KBS0707	Indiana University	8011043706	Pseudomonadota	Gammaproteobacteria	Pseudomonadales	Pseudomonadaceae	Pseudomonas	Pseudomonas sp. KBS0707	Yes	Yes	Environmental	Terrestrial	Unclassified	Soil	Unclassified	USA: Hickory Corners, Michigan		6109947	5798
8068731567	Bacteria	Permanent Draft	Genome Sequencing of Type Strains	Brevibacterium luteum ATCC 15830	Indigo Agriculture, MA, USA	8068731567	Actinomycetota	Actinomycetes	Micrococcales	Microbacteriaceae	Curtobacterium	Curtobacterium luteum	Yes	Yes	Environmental	Terrestrial	Paddy field/soil	Soil	Unclassified			3703208	3620
8048162184	Bacteria	Permanent Draft	Clostridium chromiireducens C1 genome sequencing	Clostridium chromiireducens C1	Institute of Chemical and Engineering Sciences	8048162184	Bacillota	Clostridia	Eubacteriales	Clostridiaceae	Clostridium	Clostridium chromiireducens	Yes	Yes	Environmental	Terrestrial	Unclassified	Soil	Unclassified	USA: Connecticut	Soil	5843819	5504
2744055079	Bacteria	Permanent Draft	Draft Genomes of Chromium Resistant Microbes	Microbacterium sp. K22	Cincinnati Childrens Hospital Medical Center	2744055079	Actinomycetota	Actinomycetes	Micrococcales	Microbacteriaceae	Microbacterium	Microbacterium sp. K22	Yes	Yes	Environmental	Terrestrial	Unclassified	Soil	Contaminated	Seymore, IN		3934093	3884
8064445878	Bacteria	Permanent Draft	Atlantibacter subterranea ZYL01 genome sequencing	Atlantibacter subterranea ZYL01	Jinan University	8064445878	Pseudomonadota	Gammaproteobacteria	Enterobacterales	Enterobacteriaceae	Atlantibacter	Atlantibacter subterranea	Yes	Yes	Environmental	Terrestrial	Agricultural land	Soil	Unclassified	China: Hunan		4597444	4457
8050794311	Bacteria	Permanent Draft	Genome sequencing of Burkholderia ubonensis strain from Australia	Burkholderia ubonensis MSMB0671b	Menzies School of Health Research	8050794311	Pseudomonadota	Betaproteobacteria	Burkholderiales	Burkholderiaceae	Burkholderia	Burkholderia ubonensis	Yes	Yes	Environmental	Terrestrial	Unclassified	Soil	Unclassified	Australia: Northern Territory		7202158	6607
8038481449	Bacteria	Permanent Draft	Burkholderia Genome sequencing - Northern Arizona University	Burkholderia territorii MSMB1168WGS	Northern Arizona University	8038481449	Pseudomonadota	Betaproteobacteria	Burkholderiales	Burkholderiaceae	Burkholderia	Burkholderia territorii	Yes	Yes	Environmental	Terrestrial	Unclassified	Soil	Unclassified	Australia: Tanami East, Northern Territory		7132262	6635
8050787405	Bacteria	Permanent Draft	Burkholderia Genome sequencing - Northern Arizona University	Burkholderia ubonensis MSMB2037	Northern Arizona University	8050787405	Pseudomonadota	Betaproteobacteria	Burkholderiales	Burkholderiaceae	Burkholderia	Burkholderia ubonensis	Yes	Yes	Environmental	Terrestrial	Unclassified	Soil	Unclassified	Australia: Tanami East, Northern Territory		7455529	6901
8068541239	Bacteria	Permanent Draft	Azospirillum formosense CC-NFb-7	Azospirillum formosense CC-NFb-7	Federal University of Rio de Janeiro	8068541239	Pseudomonadota	Alphaproteobacteria	Rhodospirillales	Azospirillaceae	Azospirillum	Azospirillum formosense	Yes	Yes	Environmental	Terrestrial	Unclassified	Soil	Unclassified	Taiwan		6161078	6083
2808606889	Bacteria	Permanent Draft	Burkholderia Genome sequencing - Northern Arizona University	Burkholderia ubonensis MSMB834WGS	Northern Arizona University	2808606889	Pseudomonadota	Betaproteobacteria	Burkholderiales	Burkholderiaceae	Burkholderia	Burkholderia ubonensis	Yes	Yes	Environmental	Terrestrial	Unclassified	Soil	Unclassified	Australia: Tanami East, Northern Territory		7654173	6997
645058857	Bacteria	Permanent Draft	Streptomyces hygroscopicus ATCC 53653	Streptomyces hygroscopicus ATCC 53653	Broad Institute	645058857	Actinomycetota	Actinomycetes	Kitasatosporales	Streptomycetaceae	Streptomyces	Streptomyces himastatinicus	Yes	Yes	Environmental	Terrestrial	Unclassified	Soil	Unclassified		Soil	10466286	9574
2754412328	Bacteria	Permanent Draft	Burkholderia Genome sequencing - Northern Arizona University	Burkholderia territorii MSMB1836	Northern Arizona University	2754412328	Pseudomonadota	Betaproteobacteria	Burkholderiales	Burkholderiaceae	Burkholderia	Burkholderia territorii	Yes	Yes	Environmental	Terrestrial	Unclassified	Soil	Unclassified	Australia: Tanami East, Northern Territory		7006928	6293
2775507157	Bacteria	Permanent Draft	Large-scale bioinformatics analysis of Bacillus genomes	Bacillus sp. AFS006103	University of North Carolina, Chapel Hill	2775507157	Bacillota	Bacilli	Bacillales	Bacillaceae	Bacillus	Bacillus sp. AFS006103	Yes	Yes	Environmental	Terrestrial	Unclassified	Soil	Unclassified	USA: Iowa		5168265	5091
645058823	Bacteria	Permanent Draft	Streptomyces albus J1074	Streptomyces albidoflavus J1074	Broad Institute	645058823	Actinomycetota	Actinomycetes	Kitasatosporales	Streptomycetaceae	Streptomyces	Streptomyces albidoflavus	Yes	Yes	Environmental	Terrestrial	Unclassified	Soil	Unclassified		Soil	6619469	6114
8065937510	Bacteria	Permanent Draft	Description of novel Gluconacetobacter Genome sequencing	Gluconacetobacter asukensis LMG 27724	Ghent University	8065937510	Pseudomonadota	Alphaproteobacteria	Rhodospirillales	Acetobacteraceae	Gluconacetobacter	Gluconacetobacter asukensis	Yes	Yes	Environmental	Terrestrial	Unclassified	Soil	Unclassified	Japan		4387527	4025
2867521640	Bacteria	Permanent Draft	Kribbella capetownensis sp. nov. and Kribbella speibonae sp. nov.	Kribbella soli KCTC 29219	University of Cape Town	2867521640	Actinomycetota	Actinomycetes	Propionibacteriales	Kribbellaceae	Kribbella	Kribbella soli	Yes	Yes	Environmental	Terrestrial	Unclassified	Soil	Unclassified	Russia: Moscow, Yugo Zapadnaya Southwest Troparevsky Forest Park		8785001	8584
8084782433	Bacteria	Finished	Mucilaginibacter sp. KACC 22773 genome sequencing	Mucilaginibacter sp. KACC 22773	National Institute of Agricultural Sciences, Rural Development Administration, National Institute of Agricultural Sciences, Rural Development Administration (RDA), South Korea	8084782433	Bacteroidota	Sphingobacteriia	Sphingobacteriales	Sphingobacteriaceae	Mucilaginibacter	Mucilaginibacter sp. KACC 22773	Yes	Yes	Environmental	Terrestrial	Unclassified	Soil	Unclassified	South Korea: Gyeongsangnam-do, Miryang-si		7541737	6499
2731957600	Bacteria	Permanent Draft	Smaragdicoccus niigatensis NBRC 103563	Smaragdicoccus niigatensis NBRC 103563	National Institute of Technology and Evaluation	2731957600	Actinomycetota	Actinomycetes	Mycobacteriales	Nocardiaceae	Smaragdicoccus	Smaragdicoccus niigatensis	Yes	Yes	Environmental	Terrestrial	Unclassified	Soil	Oil-contaminated	Niigata, Japan		5310064	5219
2839167154	Bacteria	Permanent Draft	Chitinophaga sp. K20C18050901 genome sequencing	Chitinophaga silvisoli K20C18050901	Guangdong Institute of Microbiology	2839167154	Bacteroidota	Chitinophagia	Chitinophagales	Chitinophagaceae	Chitinophaga	Chitinophaga silvisoli	Yes	Yes	Environmental	Terrestrial	Forest	Soil	Unclassified	China: Dinghushan Biosphere Reserve		8355436	7085
2775507172	Bacteria	Permanent Draft	Large-scale bioinformatics analysis of Bacillus genomes	Bacillus sp. AFS054943	University of North Carolina, Chapel Hill	2775507172	Bacillota	Bacilli	Bacillales	Bacillaceae	Bacillus	Bacillus sp. AFS054943	Yes	Yes	Environmental	Terrestrial	Unclassified	Soil	Unclassified	USA: North Carolina		5416354	5602
2648501645	Bacteria	Permanent Draft	Genome sequencing of soil and sea water bacteria from France	Pantoea vagans ZBG6	University of Malaya	2648501645	Pseudomonadota	Gammaproteobacteria	Enterobacterales	Erwiniaceae	Pantoea	Pantoea vagans	Yes	Yes	Environmental	Terrestrial	Unclassified	Soil	Unclassified	Zellenberg		4718491	4454
2881807073	Bacteria	Permanent Draft	Population genomics tropical Pseudomonas	Pseudomonas sp. R33(2017)	University of Sao Paulo	2881807073	Pseudomonadota	Gammaproteobacteria	Pseudomonadales	Pseudomonadaceae	Pseudomonas	Pseudomonas sp. R33(2017)	Yes	Yes	Environmental	Terrestrial	Loam	Soil	Agricultural soil	Brazil: Piracicaba, Sao Paulo		6268996	5902
3003035650	Bacteria	Permanent Draft	Genome sequencing to further insight into bacterial adaptation of environment and study on the phylogeny of them	Azospirillum sp. SYSU D00513	Sun Yat-Sen University	3003035650	Pseudomonadota	Alphaproteobacteria	Rhodospirillales	Azospirillaceae	Azospirillum	Azospirillum sp. SYSU D00513	Yes	Yes	Environmental	Terrestrial	Desert	Soil	Unclassified	China: Xinjiang		6905869	6652
2772190749	Bacteria	Permanent Draft	Burkholderia Genome sequencing - Northern Arizona University	Burkholderia latens RF32-BP12	Northern Arizona University	2772190749	Pseudomonadota	Betaproteobacteria	Burkholderiales	Burkholderiaceae	Burkholderia	Burkholderia latens	Yes	Yes	Environmental	Terrestrial	Unclassified	Soil	Unclassified	Thailand: Ubon, Pibul		6496349	5860
2731957636	Bacteria	Permanent Draft	Vibrio natriegens NBRC 15636	Vibrio natriegens NBRC 15636	National Institute of Technology and Evaluation	2731957636	Pseudomonadota	Gammaproteobacteria	Vibrionales	Vibrionaceae	Vibrio	Vibrio natriegens	Yes	Yes	Environmental	Terrestrial	Unclassified	Soil	Unclassified		Mud	5096560	4656
2811995186	Bacteria	Permanent Draft	Genome sequencing of Streptomyces type strains - USDA	Streptomyces niveus NRRL 2466	USDA/ARS/NCAUR	2811995186	Actinomycetota	Actinomycetes	Kitasatosporales	Streptomycetaceae	Streptomyces	Streptomyces niveus	Yes	Yes	Environmental	Terrestrial	Unclassified	Soil	Unclassified	USA		8215662	7707
2995332456	Bacteria	Permanent Draft	Paraliobacillus zengyii X-1125 genome sequencing	Georgenia ruanii JCM 15130	Chinese Center for Disease Control and Prevention	2995332456	Actinomycetota	Actinomycetes	Micrococcales	Bogoriellaceae	Georgenia	Georgenia ruanii	Yes	Yes	Environmental	Terrestrial	Unclassified	Soil	Unclassified	China: Lijiang, Yunnan Province		4424698	4102
8038705371	Bacteria	Permanent Draft	Burkholderia Genome sequencing - Northern Arizona University	Burkholderia cepacia MSMB1061WGS	Northern Arizona University	8038705371	Pseudomonadota	Betaproteobacteria	Burkholderiales	Burkholderiaceae	Burkholderia	Burkholderia cepacia	Yes	Yes	Environmental	Terrestrial	Unclassified	Soil	Unclassified	Australia: Tanami East, Northern Territory		7120145	6782
2920284866	Bacteria	Permanent Draft	Genome Sequencing of Flavihumibacter stibioxidans YS-17	Flavihumibacter stibioxidans YS-17	Huazhong Agricultural University	2920284866	Bacteroidota	Chitinophagia	Chitinophagales	Chitinophagaceae	Flavihumibacter	Flavihumibacter stibioxidans	Yes	Yes	Environmental	Terrestrial	Unclassified	Soil	Mine	China: Hunan province		4609928	4045
8084400239	Bacteria	Finished	Pseudomonas sp. Q1-7 genome sequencing	Pseudomonas sp. Q1-7	South China Agricultural University	8084400239	Pseudomonadota	Gammaproteobacteria	Pseudomonadales	Pseudomonadaceae	Pseudomonas	Pseudomonas sp. Q1-7	Yes	Yes	Environmental	Terrestrial	Unclassified	Soil	Unclassified	China: Guangdong		5780855	5429
2645727525	Bacteria	Finished	Pseudomonas versuta L10.10	Pseudomonas versuta L10.10	University of Malaya	2645727525	Pseudomonadota	Gammaproteobacteria	Pseudomonadales	Pseudomonadaceae	Pseudomonas	Pseudomonas versuta	Yes	Yes	Environmental	Terrestrial	Sand	Soil	Unclassified	Lagoon Island, Antarctica		5149788	4782
2731957661	Bacteria	Permanent Draft	Neobacillus soli NBRC 102451	Neobacillus soli NBRC 102451	National Institute of Technology and Evaluation	2731957661	Bacillota	Bacilli	Bacillales	Bacillaceae	Neobacillus	Neobacillus soli	Yes	Yes	Environmental	Terrestrial	Unclassified	Soil	Unclassified	The Netherlands		5459242	5387
2916784382	Bacteria	Finished	Streptomyces olivochromogenes Genome sequencing	Streptomyces sp. S1A1-7	Universite de Lorraine	2916784382	Actinomycetota	Actinomycetes	Kitasatosporales	Streptomycetaceae	Streptomyces	Streptomyces sp. S1A1-7	Yes	Yes	Environmental	Terrestrial	Unclassified	Soil	Unclassified	France: Montiers		12005569	11119
2884420637	Bacteria	Permanent Draft	Dyella amyloliquefaciens DHC06 genome sequencing	Dyella amyloliquefaciens DHC06	Sun Yat-Sen University	2884420637	Pseudomonadota	Gammaproteobacteria	Xanthomonadales	Rhodanobacteraceae	Dyella	Dyella amyloliquefaciens	Yes	Yes	Environmental	Terrestrial	Unclassified	Soil	Unclassified	China: Guangdong Province, Dinghushan Biosphere Reserve		4834900	4291
2537561730	Bacteria	Permanent Draft	Broad Institute - Bacillus cereus sequencing	Bacillus cereus MC118	Broad Institute	2537561730	Bacillota	Bacilli	Bacillales	Bacillaceae	Bacillus	Bacillus cereus	Yes	Yes	Environmental	Terrestrial	Unclassified	Soil	Unclassified			5584023	5788
2903049818	Bacteria	Permanent Draft	Arthrobacter deserti CGMCC 1.15091 genome sequencing	Arthrobacter deserti CGMCC 1.15091	Institute of Medicinal Biotechnology, Chinese Academy of Medical Sciences	2903049818	Actinomycetota	Actinomycetes	Micrococcales	Micrococcaceae	Arthrobacter	Arthrobacter deserti	Yes	Yes	Environmental	Terrestrial	Unclassified	Soil	Unclassified	China: Turpan desert		3257427	3800
2648501651	Bacteria	Permanent Draft	Genome sequencing of soil and sea water bacteria from France	Pseudomonas lini ZBG1	University of Malaya	2648501651	Pseudomonadota	Gammaproteobacteria	Pseudomonadales	Pseudomonadaceae	Pseudomonas	Pseudomonas lini	Yes	Yes	Environmental	Terrestrial	Unclassified	Soil	Unclassified	Zellenberg		6488889	6065
2982507358	Bacteria	Permanent Draft	De novo sequencing of myxobacteria isolates	Corallococcus sp. NCSPR001	University of Mississippi	2982507358	Myxococcota	Myxococcia	Myxococcales	Myxococcaceae	Corallococcus	Corallococcus sp. NCSPR001	Yes	Yes	Environmental	Terrestrial	Forest	Soil	Unclassified	USA: Asheville, NC	Soil	9785177	8027
2609459843	Bacteria	Permanent Draft	Alkalihalobacillus akibai JCM 9157	Alkalihalobacillus akibai JCM 9157	University of Tokyo	2609459843	Bacillota	Bacilli	Bacillales	Bacillaceae	Halalkalibacter	Halalkalibacter akibai	Yes	Yes	Environmental	Terrestrial	Unclassified	Soil	Unclassified		Soil	4740369	5021
2754412402	Bacteria	Permanent Draft	Burkholderia Genome sequencing - Northern Arizona University	Burkholderia pseudomultivorans SUB-INT22-BP1	Northern Arizona University	2754412402	Pseudomonadota	Betaproteobacteria	Burkholderiales	Burkholderiaceae	Burkholderia	Burkholderia pseudomultivorans	Yes	Yes	Environmental	Terrestrial	Unclassified	Soil	Unclassified	Thailand: Ubon		7787302	7022
8061145660	Bacteria	Permanent Draft	Large-scale bioinformatics analysis of Bacillus genomes	Bacillus thuringiensis AFS053744	University of North Carolina, Chapel Hill	8061145660	Bacillota	Bacilli	Bacillales	Bacillaceae	Bacillus	Bacillus thuringiensis	Yes	Yes	Environmental	Terrestrial	Unclassified	Soil	Unclassified	USA: New York		5890645	6291
2897809990	Bacteria	Permanent Draft	Azospirillum sp. Genome sequencing	Azospirillum sp. TSH58	University of Minnesota	2897809990	Pseudomonadota	Alphaproteobacteria	Rhodospirillales	Azospirillaceae	Azospirillum	Azospirillum sp. TSH58	Yes	Yes	Environmental	Terrestrial	Paddy field/soil	Soil	Unclassified	Japan: Tokyo		6982874	6513
2822406239	Bacteria	Permanent Draft	Large-scale bioinformatics analysis of Bacillus genomes	Bacillus toyonensis AFS089729	University of North Carolina, Chapel Hill	2822406239	Bacillota	Bacilli	Bacillales	Bacillaceae	Bacillus	Bacillus toyonensis	Yes	Yes	Environmental	Terrestrial	Unclassified	Soil	Unclassified	USA: North Carolina		5840381	6207
3000021310	Bacteria	Permanent Draft	Genome sequencing of Oxalobacteraceae bacterium OM1	Oxalobacteraceae bacterium OM1	South Dakota State University	3000021310	Pseudomonadota	Betaproteobacteria	Burkholderiales	Oxalobacteraceae	unclassified	Oxalobacteraceae bacterium OM1	Yes	Yes	Environmental	Terrestrial	Unclassified	Soil	Unclassified	USA		4709175	4926
2866870080	Bacteria	Permanent Draft	Whole-genome analyses of novel actinobacteria	Actinomadura sp. 6K520	Ondokuz Mayis University	2866870080	Actinomycetota	Actinomycetes	Streptosporangiales	Thermomonosporaceae	Actinomadura	Actinomadura sp. 6K520	Yes	Yes	Environmental	Terrestrial	Sand	Soil	Desert	Turkmenistan: Mary		8190264	7853
2924769383	Bacteria	Permanent Draft	Mesorhizobia in Australia	Mesorhizobium sp. B2-5-6	Curtin University	2924769383	Pseudomonadota	Alphaproteobacteria	Hyphomicrobiales	Phyllobacteriaceae	Mesorhizobium	Mesorhizobium sp. B2-5-6	Yes	Yes	Environmental	Terrestrial	Unclassified	Soil	Unclassified	Australia: WA, Badgingarra		6677294	6694
8050780105	Bacteria	Permanent Draft	Burkholderia Genome sequencing - Northern Arizona University	Burkholderia ubonensis MSMB1186	Northern Arizona University	8050780105	Pseudomonadota	Betaproteobacteria	Burkholderiales	Burkholderiaceae	Burkholderia	Burkholderia ubonensis	Yes	Yes	Environmental	Terrestrial	Unclassified	Soil	Unclassified	Australia: Tanami East, Northern Territory		7682504	7295
2994565256	Bacteria	Permanent Draft	Xinfangfangia soli CCTCC AB 2017177	Xinfangfangia soli CCTCC AB 2017177	Chinese Academy of Forestry	2994565256	Pseudomonadota	Alphaproteobacteria	Rhodobacterales	Paracoccaceae	Tabrizicola	Tabrizicola soli	Yes	Yes	Environmental	Terrestrial	Unclassified	Soil	Unclassified	China: Beijing		4683966	4658
3000531888	Bacteria	Permanent Draft	Genome sequencing to further insight into bacterial adaptation of environment and study on the phylogeny of them	Naasia sp. SYSU D00948	Sun Yat-Sen University	3000531888	Actinomycetota	Actinomycetes	Micrococcales	Microbacteriaceae	Naasia	Naasia sp. SYSU D00948	Yes	Yes	Environmental	Terrestrial	Desert	Soil	Unclassified	China: Xinjiang		3209299	3038
2890081466	Bacteria	Permanent Draft	Bacteria Genome sequencing	Xenophilus sp. L33	Institute of Microbiology of the AS CR	2890081466	Pseudomonadota	Betaproteobacteria	Burkholderiales	Comamonadaceae	Xenophilus	Xenophilus sp. L33	Yes	Yes	Environmental	Terrestrial	Unclassified	Soil	Unclassified	Czech Republic		6916727	6993
3003603654	Bacteria	Permanent Draft	Genome sequencing to further insight into bacterial adaptation of environment and study on the phylogeny of them	Nocardioides sp. SYSU D00038	Sun Yat-Sen University	3003603654	Actinomycetota	Actinomycetes	Propionibacteriales	Nocardioidaceae	Nocardioides	Nocardioides sp. SYSU D00038	Yes	Yes	Environmental	Terrestrial	Desert	Soil	Unclassified	China: Xinjiang		4337702	4167
3005512859	Bacteria	Permanent Draft	Genome sequencing of free-living Bradyrhizobium	Bradyrhizobium diazoefficiens SZCCT0423	The Chinese University of Hong Kong	3005512859	Pseudomonadota	Alphaproteobacteria	Hyphomicrobiales	Nitrobacteraceae	Bradyrhizobium	Bradyrhizobium diazoefficiens	Yes	Yes	Environmental	Terrestrial	Unclassified	Soil	Unclassified	China: Shenzhen, Guangdong		7095320	6862
2989242525	Bacteria	Permanent Draft	Phytoactinopolyspora alkaliphila CGMCC 4.7225	Phytoactinopolyspora alkaliphila CGMCC 4.7225	Hebei North University	2989242525	Actinomycetota	Actinomycetes	Jiangellales	Jiangellaceae	Phytoactinopolyspora	Phytoactinopolyspora alkaliphila	Yes	Yes	Environmental	Terrestrial	Unclassified	Soil	Unclassified			5506198	5103
2884196110	Bacteria	Finished	Nitratireductor sp. SY7 genome sequencing	Nitratireductor mangrovi SY7	Zhejiang University	2884196110	Pseudomonadota	Alphaproteobacteria	Hyphomicrobiales	Phyllobacteriaceae	Nitratireductor	Nitratireductor mangrovi	Yes	Yes	Environmental	Terrestrial	Unclassified	Soil	Unclassified	China		4855325	4816
2882825624	Bacteria	Permanent Draft	Clostridium sporogenes Genome sequencing and assembly	Clostridium sp. DSM 18688	Institute for Environmental Health	2882825624	Bacillota	Clostridia	Eubacteriales	Clostridiaceae	Clostridium	Clostridium tepidum	Yes	Yes	Environmental	Terrestrial	Unclassified	Soil	Unclassified	Italy: Viterbo		2958515	2933
3005703753	Bacteria	Permanent Draft	Genome sequencing of free-living Bradyrhizobium	Bradyrhizobium lablabi SZCCT0009	The Chinese University of Hong Kong	3005703753	Pseudomonadota	Alphaproteobacteria	Hyphomicrobiales	Nitrobacteraceae	Bradyrhizobium	Bradyrhizobium lablabi	Yes	Yes	Environmental	Terrestrial	Unclassified	Soil	Unclassified	China: Shenzhen, Guangdong		7240814	7033
2977335026	Bacteria	Permanent Draft	Cystobacter gracilis DSM 14753 genome sequencing	Cystobacter gracilis DSM 14753	Guangdong Institute of Microbiology	2977335026	Myxococcota	Myxococcia	Myxococcales	Archangiaceae	Hyalangium	Hyalangium gracile	Yes	Yes	Environmental	Terrestrial	Unclassified	Soil	Unclassified			11731597	9515
8038877083	Bacteria	Permanent Draft	Burkholderia Genome sequencing - Northern Arizona University	Burkholderia cepacia INT3-BP99	Northern Arizona University	8038877083	Pseudomonadota	Betaproteobacteria	Burkholderiales	Burkholderiaceae	Burkholderia	Burkholderia cepacia	Yes	Yes	Environmental	Terrestrial	Unclassified	Soil	Unclassified	Thailand: Ubon		8735518	8232
2808606845	Bacteria	Permanent Draft	Burkholderia Genome sequencing - Northern Arizona University	Burkholderia ubonensis MSMB2114WGS	Northern Arizona University	2808606845	Pseudomonadota	Betaproteobacteria	Burkholderiales	Burkholderiaceae	Burkholderia	Burkholderia ubonensis	Yes	Yes	Environmental	Terrestrial	Unclassified	Soil	Unclassified	Australia: Tanami East, Northern Territory		7924469	7233
2843178586	Bacteria	Finished	Paracoccus mutanolyticus RSP-02 genome sequencing	Paracoccus mutanolyticus RSP-02	CSIR-Indian Institute of Chemical Technology	2843178586	Pseudomonadota	Alphaproteobacteria	Rhodobacterales	Paracoccaceae	Paracoccus	Paracoccus mutanolyticus	Yes	Yes	Environmental	Terrestrial	Garden	Soil	Unclassified	India: Sirpur Kagaznagar		3592357	4702
8061437682	Bacteria	Permanent Draft	Large-scale bioinformatics analysis of Bacillus genomes	Bacillus wiedmannii AFS033387	University of North Carolina, Chapel Hill	8061437682	Bacillota	Bacilli	Bacillales	Bacillaceae	Bacillus	Bacillus wiedmannii	Yes	Yes	Environmental	Terrestrial	Unclassified	Soil	Unclassified	USA: Iowa		5422695	5813
2894328782	Bacteria	Permanent Draft	Microvirga sp. c23x22 genome sequencing	Microvirga sp. c23x22	Guangdong Institute of Microbiology	2894328782	Pseudomonadota	Alphaproteobacteria	Hyphomicrobiales	Methylobacteriaceae	Microvirga	Microvirga terricola	Yes	Yes	Environmental	Terrestrial	Unclassified	Soil	Unclassified	China: Chebaling national nature reserve, Guangdong Province		3752118	3662
2754412312	Bacteria	Finished	Burkholderia Genome sequencing - Northern Arizona University	Burkholderia sp. MSMB1588	Northern Arizona University	2754412312	Pseudomonadota	Betaproteobacteria	Burkholderiales	Burkholderiaceae	Burkholderia	Burkholderia sp. MSMB1588	Yes	Yes	Environmental	Terrestrial	Unclassified	Soil	Unclassified	Australia: Tanami East, Northern Territory		2820463	2347
8038885320	Bacteria	Permanent Draft	Burkholderia Genome sequencing - Northern Arizona University	Burkholderia cepacia MSMB1333WGS	Northern Arizona University	8038885320	Pseudomonadota	Betaproteobacteria	Burkholderiales	Burkholderiaceae	Burkholderia	Burkholderia cepacia	Yes	Yes	Environmental	Terrestrial	Unclassified	Soil	Unclassified	Australia: Tanami East, Northern Territory		8384588	7835
2826757802	Bacteria	Permanent Draft	Large-scale bioinformatics analysis of Bacillus genomes	Bacillus pseudomycoides AFS077796	University of North Carolina, Chapel Hill	2826757802	Bacillota	Bacilli	Bacillales	Bacillaceae	Bacillus	Bacillus pseudomycoides	Yes	Yes	Environmental	Terrestrial	Unclassified	Soil	Unclassified	USA: Iowa		5748771	6287
8074987822	Bacteria	Permanent Draft	Riparian wetland methanotrophs	Methylocystis sp. H15	Netherlands Institute of Ecology (NIOO-KNAW)	8074987822	Pseudomonadota	Alphaproteobacteria	Hyphomicrobiales	Methylocystaceae	Methylocystis	Methylocystis sp. H15	Yes	Yes	Environmental	Terrestrial	Unclassified	Soil	Unclassified	Netherlands: River Waal		4053493	4132
2627853777	Bacteria	Permanent Draft	Genome sequencing of Lysinibacillus strains	Lysinibacillus boronitolerans JCM 21713 = 10a = NBRC 103108	Huazhong Agricultural University	2627853777	Bacillota	Bacilli	Bacillales	Bacillaceae	Lysinibacillus	Lysinibacillus boronitolerans	Yes	Yes	Environmental	Terrestrial	Garden	Soil	Unclassified	Japan, University of Tokyo	Soil	4564150	4659
2808606908	Bacteria	Permanent Draft	Burkholderia Genome sequencing - Northern Arizona University	Burkholderia ubonensis INT1-BP274	Northern Arizona University	2808606908	Pseudomonadota	Betaproteobacteria	Burkholderiales	Burkholderiaceae	Burkholderia	Burkholderia ubonensis	Yes	Yes	Environmental	Terrestrial	Unclassified	Soil	Unclassified	Thailand: Ubon		7632149	6909
2524614525	Bacteria	Draft	LTSP forest soil bacteria	Caulobacter segnis ISO597	Canadas Michael Smith Genome Sciences Centre	2524614525	Pseudomonadota	Alphaproteobacteria	Caulobacterales	Caulobacteraceae	Caulobacter	Caulobacter segnis	No	Yes	Environmental	Terrestrial	Boreal forest/Taiga	Soil	Bulk soil	British Columbia		4281085	4191
2969107516	Bacteria	Finished	Bacillus thuringiensis T0131 genome sequencing	Bacillus thuringiensis T0131	Federal Universaty of Tocantins	2969107516	Bacillota	Bacilli	Bacillales	Bacillaceae	Bacillus	Bacillus thuringiensis	Yes	Yes	Environmental	Terrestrial	Unclassified	Soil	Unclassified	Brazil: Tocantins		6157090	6559
2866733597	Bacteria	Permanent Draft	Whole-genome analyses of novel actinobacteria	Actinomadura sp. 7K507	Ondokuz Mayis University	2866733597	Actinomycetota	Actinomycetes	Streptosporangiales	Thermomonosporaceae	Actinomadura	Actinomadura sp. 7K507	Yes	Yes	Environmental	Terrestrial	Sand	Soil	Desert	Turkmenistan: Mary		9799144	9413
3001679735	Bacteria	Permanent Draft	Azoarcus sp. Aa7	Azoarcus sp. Aa7	Georg-August University of Goettingen, Goettingen Genomics Laboratory	3001679735	Pseudomonadota	Betaproteobacteria	Rhodocyclales	Zoogloeaceae	Azoarcus	Azoarcus sp. Aa7	Yes	Yes	Environmental	Terrestrial	Unclassified	Soil	Unclassified	Germany: Muenster		5394175	5124
2808606851	Bacteria	Permanent Draft	Burkholderia Genome sequencing - Northern Arizona University	Burkholderia ubonensis MSMB1832WGS	Northern Arizona University	2808606851	Pseudomonadota	Betaproteobacteria	Burkholderiales	Burkholderiaceae	Burkholderia	Burkholderia ubonensis	Yes	Yes	Environmental	Terrestrial	Unclassified	Soil	Unclassified	Australia: Tanami East, Northern Territory		7863343	7043
8022898867	Bacteria	Permanent Draft	Bacillus aryabhattai PHB10 genome sequencing	Bacillus aryabhattai PHB10	Rajiv Gandhi Centre for Biotechnology	8022898867	Bacillota	Bacilli	Bacillales	Bacillaceae	Priestia	Priestia aryabhattai	Yes	Yes	Environmental	Terrestrial	Garden	Soil	Unclassified	India: Kerala, Thiruvananthapuram		4193880	4564
2724678950	Bacteria	Permanent Draft	Genome sequnecing of Colistin resistant Salmonella isolated from French food-animals and their environments	Salmonella enterica enterica sv. Typhimurium 2012CEB2427SAL	Texas Tech University	2724678950	Pseudomonadota	Gammaproteobacteria	Enterobacterales	Enterobacteriaceae	Salmonella	Salmonella enterica	Yes	Yes	Environmental	Terrestrial	Unclassified	Soil	Farm	France: department 01		5179075	5171
2885967263	Bacteria	Permanent Draft	Pseudomonas sp. H9 genome sequencing	Pseudomonas sp. H9	National Kaohsiung Normal University	2885967263	Pseudomonadota	Gammaproteobacteria	Pseudomonadales	Pseudomonadaceae	Pseudomonas	Pseudomonas sp. H9	Yes	Yes	Environmental	Terrestrial	Unclassified	Soil	Unclassified	Taiwan		5878140	5441
8070464643	Bacteria	Finished	Hymenobacter sp. YIM 151858-1 genome sequencing	Hymenobacter sp. YIM 151858-1	Yunnan University	8070464643	Bacteroidota	Cytophagia	Cytophagales	Hymenobacteraceae	Hymenobacter	Hymenobacter sp. YIM 151858-1	Yes	Yes	Environmental	Terrestrial	Unclassified	Soil	Unclassified	China		4621779	4169
8078857761	Bacteria	Permanent Draft	Antibiotic producing bacterial isolates	Enterobacter sp. RIT637	Rochester Institute of Technology	8078857761	Pseudomonadota	Gammaproteobacteria	Enterobacterales	Enterobacteriaceae	Enterobacter	Enterobacter sp. RIT637	Yes	Yes	Environmental	Terrestrial	Unclassified	Soil	Unclassified	USA: Rochester, NY, Rochester Institute of Technology campus		4946785	4965
2513237320	Bacteria	Permanent Draft	Gordonia terrae NBRC 100016	Gordonia terrae NBRC 100016	National Institute of Technology and Evaluation	2513237320	Actinomycetota	Actinomycetes	Mycobacteriales	Gordoniaceae	Gordonia	Gordonia terrae	Yes	Yes	Environmental	Terrestrial	Unclassified	Soil	Unclassified		Soil	5669149	5181
2890766748	Bacteria	Permanent Draft	Larkinella sp. C7 genome sequencing	Larkinella sp. C7	Inner Mongolia Agricultural University	2890766748	Bacteroidota	Cytophagia	Cytophagales	Spirosomataceae	Larkinella	Larkinella sp. C7	Yes	Yes	Environmental	Terrestrial	Unclassified	Soil	Unclassified	China: Hale, Huhhot		7940859	6798
2791355433	Bacteria	Permanent Draft	Genome sequencing of Streptomyces type strains - USDA	Streptomyces carpinensis NRRL B-16921	USDA/ARS/NCAUR	2791355433	Actinomycetota	Actinomycetes	Kitasatosporales	Streptomycetaceae	Streptomyces	Streptomyces carpinensis	Yes	Yes	Environmental	Terrestrial	Unclassified	Soil	Unclassified	Brazil: Carpina, Pernambuco		10274516	9687
2970613311	Bacteria	Permanent Draft	Mesorhizobia in Australia	Mesorhizobium sp. B2-1-4	Curtin University	2970613311	Pseudomonadota	Alphaproteobacteria	Hyphomicrobiales	Phyllobacteriaceae	Mesorhizobium	Mesorhizobium sp. B2-1-4	Yes	Yes	Environmental	Terrestrial	Unclassified	Soil	Unclassified	Australia: WA, Badgingarra		6153981	6128
2731957723	Bacteria	Permanent Draft	Nocardia genome sequencing - National Institute of Technology and Evaluation, Japan	Nocardia acidivorans NBRC 108247	National Institute of Technology and Evaluation	2731957723	Actinomycetota	Actinomycetes	Mycobacteriales	Nocardiaceae	Nocardia	Nocardia acidivorans	Yes	Yes	Environmental	Terrestrial	Unclassified	Soil	Unclassified	Italy	Soil	7564474	7232
2541047118	Bacteria	Permanent Draft	Broad Institute - Bacillus cereus sequencing	Bacillus cereus HuB13-1	Broad Institute	2541047118	Bacillota	Bacilli	Bacillales	Bacillaceae	Bacillus	Bacillus cereus	Yes	Yes	Environmental	Terrestrial	Unclassified	Soil	Unclassified			6599708	6929
2989715788	Bacteria	Permanent Draft	Paenibacillus paridis py1325 genome sequencing	Paenibacillus sp. YH-JAE5	Korea Research Institute of Bioscience and Biotechnology	2989715788	Bacillota	Bacilli	Bacillales	Paenibacillaceae	Paenibacillus	Paenibacillus dokdonensis	Yes	Yes	Environmental	Terrestrial	Unclassified	Soil	Unclassified	South Korea: Dok-do island		6476225	6153
2961994749	Bacteria	Permanent Draft	Paenibacillus puerhi SJY2 genome sequencing	Paenibacillus puerhi SJY2	Beijing University of Chemical Technology	2961994749	Bacillota	Bacilli	Bacillales	Paenibacillaceae	Paenibacillus	Paenibacillus puerhi	Yes	Yes	Environmental	Terrestrial	Unclassified	Soil	Unclassified	China		6710097	6085
2885853826	Bacteria	Permanent Draft	Population genomics tropical Pseudomonas	Pseudomonas sp. R39(2017)	University of Sao Paulo	2885853826	Pseudomonadota	Gammaproteobacteria	Pseudomonadales	Pseudomonadaceae	Pseudomonas	Pseudomonas sp. R39(2017)	Yes	Yes	Environmental	Terrestrial	Loam	Soil	Agricultural soil	Brazil: Piracicaba, Sao Paulo		6269521	5897
2997657361	Bacteria	Finished	Bacillus safensis Genome sequencing	Bacillus safensis BcP62	Faculty of medecine and pharmacy (FMP-Rabat)	2997657361	Bacillota	Bacilli	Bacillales	Bacillaceae	Bacillus	Bacillus safensis	Yes	Yes	Environmental	Terrestrial	Sand	Soil	Unclassified	Morocco: Merzouga		3695102	3952
2855544577	Bacteria	Permanent Draft	Pedobacter jejuensis TNB23 genome sequencing	Pedobacter jejuensis TNB23	Korea Polar Research Institute (KOPRI)	2855544577	Bacteroidota	Sphingobacteriia	Sphingobacteriales	Sphingobacteriaceae	Pedobacter	Pedobacter jejuensis	Yes	Yes	Environmental	Terrestrial	Unclassified	Soil	Unclassified	Antarctica		4795808	4243
2754412347	Bacteria	Permanent Draft	Burkholderia Genome sequencing - Northern Arizona University	Burkholderia stagnalis MSMB2171WGS	Northern Arizona University	2754412347	Pseudomonadota	Betaproteobacteria	Burkholderiales	Burkholderiaceae	Burkholderia	Burkholderia stagnalis	Yes	Yes	Environmental	Terrestrial	Unclassified	Soil	Unclassified	Australia: Tanami East, Northern Territory		7564233	6763
2816332260	Bacteria	Permanent Draft	Burkholderia Genome sequencing - Northern Arizona University	Burkholderia vietnamiensis LA-5-5-30-S1-D2	Northern Arizona University	2816332260	Pseudomonadota	Betaproteobacteria	Burkholderiales	Burkholderiaceae	Burkholderia	Burkholderia vietnamiensis	Yes	Yes	Environmental	Terrestrial	Unclassified	Soil	Unclassified	USA: New Orleans		7051637	6420
2907455928	Bacteria	Permanent Draft	Leptospira spp. from tropical soils.	Leptospira adleri FH2-B-D1	Institut Pasteur Montevideo	2907455928	Spirochaetota	Spirochaetia	Leptospirales	Leptospiraceae	Leptospira	Leptospira adleri	Yes	Yes	Environmental	Terrestrial	Unclassified	Soil	Unclassified	New Caledonia		4826170	4566
2837279015	Bacteria	Permanent Draft	Lelliottia amnigena LMG 2784 genome sequencing	Lelliottia amnigena LMG 2784	Kyunghee University	2837279015	Pseudomonadota	Gammaproteobacteria	Enterobacterales	Enterobacteriaceae	Lelliottia	Lelliottia amnigena	Yes	Yes	Environmental	Terrestrial	Unclassified	Soil	Unclassified			4370208	4292
2970809917	Bacteria	Permanent Draft	Genome Sequencing of Stenotrophomonas sp. B2	Stenotrophomonas sp. B2	Huazhong Agricultural University	2970809917	Pseudomonadota	Gammaproteobacteria	Xanthomonadales	Xanthomonadaceae	Stenotrophomonas	Stenotrophomonas sp. B2	Yes	Yes	Environmental	Terrestrial	Unclassified	Soil	Unclassified	China: Taihang mountain		4150695	3828
2866698807	Bacteria	Permanent Draft	Whole-genome analyses of novel actinobacteria	Micromonospora sp. KC723	Ondokuz Mayis University	2866698807	Actinomycetota	Actinomycetes	Micromonosporales	Micromonosporaceae	Micromonospora	Micromonospora sp. KC723	Yes	Yes	Environmental	Terrestrial	Sand	Soil	Desert	Turkmenistan: Darvaz		6107068	5899
2920960040	Bacteria	Permanent Draft	Genome Sequencing of Psychrobacter sp. GP33	Psychrobacter sp. GP33	International Medical University, IMU	2920960040	Pseudomonadota	Gammaproteobacteria	Moraxellales	Moraxellaceae	Psychrobacter	Psychrobacter sp. GP33	Yes	Yes	Environmental	Terrestrial	Unclassified	Soil	Unclassified	Antarctica: Gourlay Peninsula		2873002	2454
2808606695	Bacteria	Finished	Burkholderia Genome sequencing - Northern Arizona University	Burkholderia sp. LA-2-3-30-S1-D2	Northern Arizona University	2808606695	Pseudomonadota	Betaproteobacteria	Burkholderiales	Burkholderiaceae	Burkholderia	Burkholderia sp. LA-2-3-30-S1-D2	Yes	Yes	Environmental	Terrestrial	Unclassified	Soil	Unclassified	USA: New Orleans		7129526	6511
8035553880	Bacteria	Permanent Draft	Pseudomonas sp. Genome sequencing and assembly	Pseudomonas protegens 38G2	Ohio State University	8035553880	Pseudomonadota	Gammaproteobacteria	Pseudomonadales	Pseudomonadaceae	Pseudomonas	Pseudomonas protegens	Yes	Yes	Environmental	Terrestrial	Unclassified	Soil	Unclassified	USA		6719051	6291
2645728052	Bacteria	Finished	Vulgatibacter incomptus DSM 27710 genome sequencing	Vulgatibacter incomptus DSM 27710	Institute of Microbial Technology (IMTECH), Council of Scientific and Industrial Research (CSIR)	2645728052	Myxococcota	Myxococcia	Myxococcales	Vulgatibacteraceae	Vulgatibacter	Vulgatibacter incomptus	Yes	Yes	Environmental	Terrestrial	Unclassified	Soil	Unclassified			4350553	3707
2847699806	Bacteria	Finished	Genome sequencing and assembly of bacteria from soil samples used in the long-term dormancy experiment	Arthrobacter sp. KBS0702	Indiana University	2847699806	Actinomycetota	Actinomycetes	Micrococcales	Micrococcaceae	Arthrobacter	Arthrobacter sp. KBS0702	Yes	Yes	Environmental	Terrestrial	Unclassified	Soil	Unclassified	USA: Hickory Corners, Michigan		3649547	3422
2965749873	Bacteria	Finished	Bacillus thuringiensis C15 genome sequencing	Bacillus thuringiensis C15	Huazhong Agricultural University	2965749873	Bacillota	Bacilli	Bacillales	Bacillaceae	Bacillus	Bacillus thuringiensis	Yes	Yes	Environmental	Terrestrial	Unclassified	Soil	Unclassified	China		6113568	6594
2902622463	Bacteria	Permanent Draft	Whole genome sequences of Micromonospora isolated from hot spring sediment	Micromonospora sp. PPF5-17B	King Mongkuts University of Technology Thonburi	2902622463	Actinomycetota	Actinomycetes	Micromonosporales	Micromonosporaceae	Micromonospora	Micromonospora sp. PPF5-17B	Yes	Yes	Environmental	Terrestrial	Unclassified	Soil	Unclassified	Thailand: Chiang Rai		5873832	5608
2751185831	Bacteria	Finished	Genome sequencing of Sphingobium sp. EP60837	Sphingobium sp. EP60837	Seoul National University	2751185831	Pseudomonadota	Alphaproteobacteria	Sphingomonadales	Sphingomonadaceae	Sphingobium	Sphingobium sp. EP60837	Yes	Yes	Environmental	Terrestrial	Unclassified	Soil	Unclassified	South Korea: Suwon		4261696	4125
2839061667	Bacteria	Permanent Draft	Nocardiopsis sp. FIRDI 009 genome sequencing	Nocardiopsis sp. FIRDI 009	Food Industry Research and Development Institute	2839061667	Actinomycetota	Actinomycetes	Streptosporangiales	Nocardiopsaceae	Nocardiopsis	Nocardiopsis sp. FIRDI 009	Yes	Yes	Environmental	Terrestrial	Unclassified	Soil	Unclassified	Taiwan: Cigu Township		5804271	5440
8067939901	Bacteria	Finished	Rhodopseudomonas boonkerdii NS23 genome sequencing	Rhodopseudomonas boonkerdii NS23	Inner Mongolia University	8067939901	Pseudomonadota	Alphaproteobacteria	Hyphomicrobiales	Nitrobacteraceae	Rhodopseudomonas	Rhodopseudomonas boonkerdii	Yes	Yes	Environmental	Terrestrial	Unclassified	Soil	Unclassified	Thailand: Chiangmai		5632343	5278
8066666531	Bacteria	Permanent Draft	Rheinheimera soli BD-d46 genome sequencing	Rheinheimera soli BD-d46	Korea University	8066666531	Pseudomonadota	Gammaproteobacteria	Chromatiales	Chromatiaceae	Rheinheimera	Rheinheimera soli	Yes	Yes	Environmental	Terrestrial	Unclassified	Soil	Unclassified		Soil	4634921	4315
2967463504	Bacteria	Permanent Draft	Bacillus sp. F20-46-2	Bacillus sp. F20-46-2	Microbial Genome Sequencing Center (MiGS)	2967463504	Bacillota	Bacilli	Bacillales	Bacillaceae	Bacillus	unclassified	Yes	Yes	Environmental	Terrestrial	Unclassified	Soil	Unclassified	USA: Bowling Green, OH		4246752	4481
2663763395	Bacteria	Permanent Draft	Genome sequencing of a diverse group of Burkholderia pseudomallei strains	Burkholderia pseudomallei E25	Wellcome Trust Sanger Institute	2663763395	Pseudomonadota	Betaproteobacteria	Burkholderiales	Burkholderiaceae	Burkholderia	Burkholderia pseudomallei	Yes	Yes	Environmental	Terrestrial	Unclassified	Soil	Unclassified			7199281	5990
3003564147	Bacteria	Permanent Draft	Genome sequencing to further insight into bacterial adaptation of environment and study on the phylogeny of them	Pedobacter sp. SYSU D00535	Sun Yat-Sen University	3003564147	Bacteroidota	Sphingobacteriia	Sphingobacteriales	Sphingobacteriaceae	Pedobacter	Pedobacter sp. SYSU D00535	Yes	Yes	Environmental	Terrestrial	Desert	Soil	Unclassified	China: Xinjiang		4885949	4363
8031756467	Bacteria	Permanent Draft	Sequencing as part of the Soil Listeria project	Listeria immobilis FSL L7-1515	Cornell University	8031756467	Bacillota	Bacilli	Bacillales	Listeriaceae	Listeria	Listeria immobilis	Yes	Yes	Environmental	Terrestrial	Unclassified	Soil	Unclassified	USA: SD		3064434	3233
2903468256	Bacteria	Permanent Draft	Mesorhizobia in Australia	Mesorhizobium sp. B2-4-1	Curtin University	2903468256	Pseudomonadota	Alphaproteobacteria	Hyphomicrobiales	Phyllobacteriaceae	Mesorhizobium	Mesorhizobium sp. B2-4-1	Yes	Yes	Environmental	Terrestrial	Unclassified	Soil	Unclassified	Australia: WA, Badgingarra		6083557	6101
2808606829	Bacteria	Permanent Draft	Burkholderia Genome sequencing - Northern Arizona University	Burkholderia ubonensis RF23-BP58	Northern Arizona University	2808606829	Pseudomonadota	Betaproteobacteria	Burkholderiales	Burkholderiaceae	Burkholderia	Burkholderia ubonensis	Yes	Yes	Environmental	Terrestrial	Unclassified	Soil	Unclassified	Thailand: Ubon, Kemarach		7910262	7103
2917791510	Bacteria	Finished	Streptomyces olivochromogenes Genome sequencing	Streptomyces sp. S1D4-14	Universite de Lorraine	2917791510	Actinomycetota	Actinomycetes	Kitasatosporales	Streptomycetaceae	Streptomyces	Streptomyces sp. S1D4-14	Yes	Yes	Environmental	Terrestrial	Unclassified	Soil	Unclassified	France: Montiers		11934630	11174
647533185	Bacteria	Permanent Draft	Micromonospora carbonacea var. africana. ATCC 39149	Micromonospora carbonacea var. africana	Broad Institute	647533185	Actinomycetota	Actinomycetes	Micromonosporales	Micromonosporaceae	Micromonospora	Micromonospora sp. ATCC 39149	Yes	Yes	Environmental	Terrestrial	Unclassified	Soil	Unclassified		Soil	6819904	5692
8056417163	Bacteria	Permanent Draft	Hanstruepera marina NBU2968 genome sequencing	Hanstruepera marina NBU2968	Ningbo University	8056417163	Bacteroidota	Flavobacteriia	Flavobacteriales	Flavobacteriaceae	Hanstruepera	Hanstruepera marina	Yes	Yes	Environmental	Terrestrial	Unclassified	Soil	Unclassified	China: Ningbo city		3282034	3123
3002270145	Bacteria	Permanent Draft	Dyella caseinilytica DHOB09 genome sequencing	Dyella mobilis DHON07	Sun Yat-Sen University	3002270145	Pseudomonadota	Gammaproteobacteria	Xanthomonadales	Rhodanobacteraceae	Dyella	Dyella mobilis	Yes	Yes	Environmental	Terrestrial	Unclassified	Soil	Unclassified	China: Guangdong		5183844	4727
2808606702	Bacteria	Finished	Burkholderia Genome sequencing - Northern Arizona University	Burkholderia sp. NRF60-BP8	Northern Arizona University	2808606702	Pseudomonadota	Betaproteobacteria	Burkholderiales	Burkholderiaceae	Burkholderia	Burkholderia sp. NRF60-BP8	Yes	Yes	Environmental	Terrestrial	Unclassified	Soil	Unclassified	Thailand: Ubon, Pibul		7079943	6432
2630968797	Bacteria	Permanent Draft	Cellulomonas cellasea DSM 20118	Cellulomonas cellasea DSM 20118	State Key Laborary of Agricultural Microbiology	2630968797	Actinomycetota	Actinomycetes	Micrococcales	Cellulomonadaceae	Cellulomonas	Cellulomonas cellasea	Yes	Yes	Environmental	Terrestrial	Unclassified	Soil	Unclassified		Soil	3913472	3696
2713896827	Bacteria	Permanent Draft	Alicyclobacillus ferrooxydans strain:TC-34 Genome sequencing	Alicyclobacillus ferrooxydans TC-34	California Institute of Technology	2713896827	Bacillota	Bacilli	Bacillales	Alicyclobacillaceae	Alicyclobacillus	Alicyclobacillus ferrooxydans	Yes	Yes	Environmental	Terrestrial	Garden	Soil	Unclassified	China: Yunnan Province		5029699	5031
2866466661	Bacteria	Permanent Draft	Microbacterium sulfonylureivorans LAM7116 Genome sequencing	Microbacterium sulfonylureivorans LAM7116	Chinese Academy of Agricultural Scineces	2866466661	Actinomycetota	Actinomycetes	Micrococcales	Microbacteriaceae	Microbacterium	Microbacterium sulfonylureivorans	Yes	Yes	Environmental	Terrestrial	Unclassified	Soil	Unclassified	China: Xinjiang Province		3791718	3536
3004891598	Bacteria	Permanent Draft	Paenibacillus sp. GSMTC-2017	Paenibacillus sp. GSMTC-2017	Western Carolina University	3004891598	Bacillota	Bacilli	Bacillales	Paenibacillaceae	Paenibacillus	Paenibacillus sp. GSMTC-2017	Yes	Yes	Environmental	Terrestrial	Unclassified	Soil	Unclassified	USA: Great Smoky Mountains National Park		5281746	5101
8050708716	Bacteria	Permanent Draft	Burkholderia Genome sequencing - Northern Arizona University	Burkholderia ubonensis MSMB2036	Northern Arizona University	8050708716	Pseudomonadota	Betaproteobacteria	Burkholderiales	Burkholderiaceae	Burkholderia	Burkholderia ubonensis	Yes	Yes	Environmental	Terrestrial	Unclassified	Soil	Unclassified	Australia: Tanami East, Northern Territory		8367277	8102
2710724153	Bacteria	Finished	Terriglobia bacterium AB60	Terriglobia bacterium AB60	Universidade Catolica de Brasilia	2710724153	Acidobacteriota	Terriglobia	unclassified	unclassified	unclassified	unclassified	Yes	Yes	Environmental	Terrestrial	Unclassified	Soil	Unclassified	Cristalina in the state of Goias, Brazil		6629889	5630
2832134320	Bacteria	Permanent Draft	Genomes of Corallococcus strains isolated from Aberystwtyh and Carmarthen Areas United Kingdom	Corallococcus sp. AB011P	Aberystwyth University	2832134320	Myxococcota	Myxococcia	Myxococcales	Myxococcaceae	Corallococcus	Corallococcus sp. AB011P	Yes	Yes	Environmental	Terrestrial	Unclassified	Soil	Unclassified	United Kingdom		10177521	8427
2946096398	Bacteria	Permanent Draft	Bacillus thuringiensis SY49-1	Bacillus thuringiensis SY49-1	Erciyes University	2946096398	Bacillota	Bacilli	Bacillales	Bacillaceae	Bacillus	Bacillus thuringiensis	Yes	Yes	Environmental	Terrestrial	Unclassified	Soil	Unclassified	Turkey: Adana		6322230	7105
2885922063	Bacteria	Permanent Draft	Population genomics tropical Pseudomonas	Pseudomonas sp. B3(2017)	University of Sao Paulo	2885922063	Pseudomonadota	Gammaproteobacteria	Pseudomonadales	Pseudomonadaceae	Pseudomonas	Pseudomonas sp. B3(2017)	Yes	Yes	Environmental	Terrestrial	Loam	Soil	Agricultural soil	Brazil: Piracicaba, Sao Paulo		6207962	5730
2889485916	Bacteria	Permanent Draft	Genome sequencing of Hansschlegelia zhihuaiae S 113	Hansschlegelia zhihuaiae S 113	Nanjing Agricultural University	2889485916	Pseudomonadota	Alphaproteobacteria	Hyphomicrobiales	Methylocystaceae	Hansschlegelia	Hansschlegelia zhihuaiae	Yes	Yes	Environmental	Terrestrial	Unclassified	Soil	Unclassified	China:Nanjing		4621517	4532
2648501642	Bacteria	Permanent Draft	Genome sequencing of soil and sea water bacteria from France	Bacillus thuringiensis ZBG4	University of Malaya	2648501642	Bacillota	Bacilli	Bacillales	Bacillaceae	Bacillus	Bacillus thuringiensis	Yes	Yes	Environmental	Terrestrial	Unclassified	Soil	Unclassified	Zellenberg		5814498	5894
3001761947	Bacteria	Finished	Gracilibacillus thailandensis TP2-8	Gracilibacillus sp. SCU50	Sichuan University	3001761947	Bacillota	Bacilli	Bacillales	Bacillaceae	Gracilibacillus	Gracilibacillus salitolerans	Yes	Yes	Environmental	Terrestrial	Unclassified	Soil	Unclassified	China: Gansu Province		5088110	4975
2994776407	Bacteria	Permanent Draft	Streptomyces reference genome collection	Planobispora longispora NBRC 13918	Biological Resource Center, National Institute of Technology and Evaluation (NBRC)	2994776407	Actinomycetota	Actinomycetes	Streptosporangiales	Streptosporangiaceae	Planobispora	Planobispora longispora	Yes	Yes	Environmental	Terrestrial	Unclassified	Soil	Unclassified		Soil	8845392	8131
2961787820	Bacteria	Permanent Draft	Sequencing as part of the GlobE Evolution project	Leptospira yasudae 201702418	INRS - Institute Armand Frappier	2961787820	Spirochaetota	Spirochaetia	Leptospirales	Leptospiraceae	Leptospira	Leptospira yasudae	Yes	Yes	Environmental	Terrestrial	Unclassified	Soil	Unclassified	Malaysia		4439186	4145
2908194190	Bacteria	Finished	A forest soil Streptomyces community	Streptomyces sp. RPA4-2	Universite de Lorraine	2908194190	Actinomycetota	Actinomycetes	Kitasatosporales	Streptomycetaceae	Streptomyces	Streptomyces sp. RPA4-2	Yes	Yes	Environmental	Terrestrial	Unclassified	Soil	Unclassified	France: Montiers-sur-Saulx forest		9856149	9373
2758568006	Bacteria	Finished	Genome sequencing of Actinoalloteichus hoggarensis DSM 45943	Actinoalloteichus hoggarensis DSM 45943	Bielefeld University	2758568006	Actinomycetota	Actinomycetes	Pseudonocardiales	Pseudonocardiaceae	Actinoalloteichus	Actinoalloteichus hoggarensis	Yes	Yes	Environmental	Terrestrial	Unclassified	Soil	Unclassified	Algeria: Tamanrasset		6606717	5611
2773857897	Bacteria	Finished	Genome sequencing of Nocardiopsis gilva YIM 90087	Nocardiopsis gilva YIM 90087	Yunnan University	2773857897	Actinomycetota	Actinomycetes	Streptosporangiales	Nocardiopsaceae	Nocardiopsis	Nocardiopsis gilva	Yes	Yes	Environmental	Terrestrial	Unclassified	Soil	Unclassified		Soil	6142152	5564
2885574870	Bacteria	Permanent Draft	Complete genome of two Rhizobium and two Mesorhizobium and comparative analysis for correct classification Genome sequencing and assembly Genome sequencing and assembly	Rhizobium sp. JAB6	Institute of Biosciences of the State University of Sao Paulo (UNESP/IBB)	2885574870	Pseudomonadota	Alphaproteobacteria	Hyphomicrobiales	Rhizobiaceae	Rhizobium	Rhizobium sp. JAB6	Yes	Yes	Environmental	Terrestrial	Unclassified	Soil	Unclassified	Brazil		4014264	3930
8001358394	Bacteria	Permanent Draft	Falsochrobactrum sp. TDYN1 genome sequencing	Falsochrobactrum sp. TDYN1	Tianjin University	8001358394	Pseudomonadota	Alphaproteobacteria	Hyphomicrobiales	Brucellaceae	Falsochrobactrum	Falsochrobactrum sp. TDYN1	Yes	Yes	Environmental	Terrestrial	Unclassified	Soil	Unclassified	China: Dagang oilfield, Tianjin		3511269	3450
3004297200	Bacteria	Permanent Draft	Mesorhizobia in Australia	Mesorhizobium sp. B2-4-6	Curtin University	3004297200	Pseudomonadota	Alphaproteobacteria	Hyphomicrobiales	Phyllobacteriaceae	Mesorhizobium	Mesorhizobium sp. B2-4-6	Yes	Yes	Environmental	Terrestrial	Unclassified	Soil	Unclassified	Australia: WA, Badgingarra		6428026	6421
2935247710	Bacteria	Finished	Pseudomonas sp. S4B6	Pseudomonas sp. S4B6	Microbial Genome Sequencing Center (MiGS)	2935247710	Pseudomonadota	Gammaproteobacteria	Pseudomonadales	Pseudomonadaceae	Pseudomonas	unclassified	Yes	Yes	Environmental	Terrestrial	Sand	Soil	Unclassified	Bowling Green, OH		5637435	5183
8046702843	Bacteria	Permanent Draft	Polyangium sorediatum DSM 14670 genome sequencing	Polyangium sorediatum DSM 14670	Guangdong Institute of Microbiology	8046702843	Myxococcota	unclassified	Polyangiales	Polyangiaceae	Polyangium	Polyangium sorediatum	Yes	Yes	Environmental	Terrestrial	Unclassified	Soil	Unclassified		Soil	12637164	10167
2767802135	Bacteria	Finished	Streptomyces aureofaciens Genome sequencing	Kitasatospora aureofaciens DM-1	Fudan University	2767802135	Actinomycetota	Actinomycetes	Kitasatosporales	Streptomycetaceae	Kitasatospora	Kitasatospora aureofaciens	Yes	Yes	Environmental	Terrestrial	Unclassified	Soil	Unclassified	China: Hebei		7076402	6347
8084005985	Bacteria	Permanent Draft	Streptomyces sp. H34-S5 genome sequencing	Streptomyces sp. H34-S5	Ondokuz Mayis University	8084005985	Actinomycetota	Actinomycetes	Kitasatosporales	Streptomycetaceae	Streptomyces	Streptomyces sp. H34-S5	Yes	Yes	Environmental	Terrestrial	Unclassified	Soil	Unclassified	Antarctica: Horseshoe Island		8978247	8763
3006356748	Bacteria	Permanent Draft	Genome Sequencing of Streptomyces sp. I05A-00742	Streptomyces sp. I05A-00742	Institute of Medicinal Biotechnology, Chinese Academy of Medical Sciences	3006356748	Actinomycetota	Actinomycetes	Kitasatosporales	Streptomycetaceae	Streptomyces	Streptomyces sp. I05A-00742	Yes	Yes	Environmental	Terrestrial	Unclassified	Soil	Unclassified			7129054	6597
2898334252	Bacteria	Permanent Draft	Bacteria Genome sequencing	Caulobacter sp. S45	Institute of Microbiology of the AS CR	2898334252	Pseudomonadota	Alphaproteobacteria	Caulobacterales	Caulobacteraceae	Caulobacter	Caulobacter sp. S45	Yes	Yes	Environmental	Terrestrial	Unclassified	Soil	Unclassified	Czech Republic		4891522	4543
2866725952	Bacteria	Permanent Draft	Whole-genome analyses of novel actinobacteria	Streptomyces hainanensis DSM 41900	Ondokuz Mayis University	2866725952	Actinomycetota	Actinomycetes	Kitasatosporales	Streptomycetaceae	Streptomyces	Streptomyces hainanensis	Yes	Yes	Environmental	Terrestrial	Unclassified	Soil	Unclassified	China	Soil	7991366	7644
2873114228	Bacteria	Finished	Streptomyces albus strain:DSM 41398 Genome sequencing	Streptomyces albus BK3-25	Shanghai Jiao Tong University	2873114228	Actinomycetota	Actinomycetes	Kitasatosporales	Streptomycetaceae	Streptomyces	Streptomyces albus	Yes	Yes	Environmental	Terrestrial	Unclassified	Soil	Unclassified			8308430	6939
645058853	Bacteria	Permanent Draft	Streptomyces sp. C	Streptomyces sp. C	Broad Institute	645058853	Actinomycetota	Actinomycetes	Kitasatosporales	Streptomycetaceae	Streptomyces	Streptomyces sp. C	Yes	Yes	Environmental	Terrestrial	Unclassified	Soil	Unclassified		Soil	7916041	7768
8057436901	Bacteria	Permanent Draft	Genome sequencing to further insight into bacterial adaptation of environment and study on the phylogeny of them	Pedobacter mongoliensis KCTC 52859	Sun Yat-Sen University	8057436901	Bacteroidota	Sphingobacteriia	Sphingobacteriales	Sphingobacteriaceae	Pedobacter	Pedobacter mongoliensis	Yes	Yes	Environmental	Terrestrial	Unclassified	Soil	Unclassified	China: Inner-Mongolia		4549596	4019
8063730045	Bacteria	Permanent Draft	Pyxidicoccus fallax CA059B	Pyxidicoccus fallax CA059B	Aberystwyth University	8063730045	Myxococcota	Myxococcia	Myxococcales	Myxococcaceae	Pyxidicoccus	Pyxidicoccus fallax	Yes	Yes	Environmental	Terrestrial	Unclassified	Soil	Unclassified	United Kingdom: Carmarthen		13390153	11337
8023413430	Bacteria	Permanent Draft	Bacillus sp. BB51/4 genome sequencing	Bacillus sp. BB51/4	University of Bialystok	8023413430	Bacillota	Bacilli	Bacillales	Bacillaceae	Bacillus	Bacillus sp. BB51/4	Yes	Yes	Environmental	Terrestrial	Unclassified	Soil	Unclassified	Poland: Biebrza National Park buffer zone		5716405	6172
2902602028	Bacteria	Permanent Draft	Whole-genome analyses of novel actinobacteria	Micromonospora sp. KC207	Ondokuz Mayis University	2902602028	Actinomycetota	Actinomycetes	Micromonosporales	Micromonosporaceae	Micromonospora	Micromonospora sp. KC207	Yes	Yes	Environmental	Terrestrial	Unclassified	Soil	Unclassified	Turkmenistan: Darvaz		7188146	6778
2895417512	Bacteria	Permanent Draft	Whole-genome analyses of novel actinobacteria	Nonomuraea sp. KC401	Ondokuz Mayis University	2895417512	Actinomycetota	Actinomycetes	Streptosporangiales	Streptosporangiaceae	Nonomuraea	Nonomuraea sp. KC401	Yes	Yes	Environmental	Terrestrial	Unclassified	Soil	Unclassified	Turkmenistan: Darvaz		9792882	9801
8069192158	Bacteria	Permanent Draft	Nocardioides terrigena KCTC 19217	Nocardioides terrigena KCTC 19217	Sun Yat-Sen University	8069192158	Actinomycetota	Actinomycetes	Propionibacteriales	Nocardioidaceae	Nocardioides	Nocardioides terrigena	Yes	Yes	Environmental	Terrestrial	Unclassified	Soil	Unclassified	South Korea: Dokdo		4778735	4714
2703719314	Bacteria	Permanent Draft	Clostridium beijerinckii strains Genome project- Goettingen Genomics Laboratory	Clostridium beijerinckii NRRL B-596	Goettingen Genomics Laboratory	2703719314	Bacillota	Clostridia	Eubacteriales	Clostridiaceae	Clostridium	Clostridium beijerinckii	Yes	Yes	Environmental	Terrestrial	Unclassified	Soil	Unclassified		Soil	6220133	5546
3007743454	Bacteria	Permanent Draft	Pseudomonas sp. Genome sequencing and assembly	Pseudomonas frederiksbergensis 39A2	Ohio State University	3007743454	Pseudomonadota	Gammaproteobacteria	Pseudomonadales	Pseudomonadaceae	Pseudomonas	Pseudomonas frederiksbergensis	Yes	Yes	Environmental	Terrestrial	Unclassified	Soil	Unclassified	USA		7099701	6631
2889968763	Bacteria	Permanent Draft	Bacteria Genome sequencing	Acidisphaera sp. L21	Institute of Microbiology of the AS CR	2889968763	Pseudomonadota	Alphaproteobacteria	Rhodospirillales	Acetobacteraceae	Acidisphaera	Acidisphaera sp. L21	Yes	Yes	Environmental	Terrestrial	Unclassified	Soil	Unclassified	Czech Republic		6380195	6362
2894581686	Bacteria	Permanent Draft	Pontibacter burrus BT327 genome sequencing	Pontibacter burrus BT327	Seoul Womens University	2894581686	Bacteroidota	Cytophagia	Cytophagales	Hymenobacteraceae	Pontibacter	Pontibacter burrus	Yes	Yes	Environmental	Terrestrial	Unclassified	Soil	Unclassified	South Korea: Uijeongbu-si		4314171	3889
2920080394	Bacteria	Permanent Draft	Genome Sequencing of Haloechinothrix aidingensis YIM 98757	Haloechinothrix aidingensis YIM 98757	Yunnan Institute of Microbiology	2920080394	Actinomycetota	Actinomycetes	Pseudonocardiales	Pseudonocardiaceae	Haloechinothrix	Haloechinothrix aidingensis	Yes	Yes	Environmental	Terrestrial	Unclassified	Soil	Unclassified	China: the Xinjiang Uygur Autonomous Region		4842419	4601
2731957676	Bacteria	Permanent Draft	Bacillus sonorensis NBRC 101234	Bacillus sonorensis NBRC 101234, KCTC 13918	National Institute of Technology and Evaluation	2731957676	Bacillota	Bacilli	Bacillales	Bacillaceae	Bacillus	Bacillus sonorensis	Yes	Yes	Environmental	Terrestrial	Unclassified	Soil	Desert	USA, Tumanoc Hill, Sonora Desert, Arizona	Soil	4406789	4408
2751186017	Bacteria	Permanent Draft	Burkholderia Genome sequencing - Northern Arizona University	Burkholderia diffusa RF8-non_BP2	Northern Arizona University	2751186017	Pseudomonadota	Betaproteobacteria	Burkholderiales	Burkholderiaceae	Burkholderia	Burkholderia diffusa	Yes	Yes	Environmental	Terrestrial	Unclassified	Soil	Unclassified	Thailand: Ubon, Trakam		5837730	5322
8084777975	Bacteria	Finished	Sphingobacterium sp. KACC 22765 genome sequencing	Sphingobacterium sp. KACC 22765	National Institute of Agricultural Sciences, Rural Development Administration, National Institute of Agricultural Sciences, Rural Development Administration (RDA), South Korea	8084777975	Bacteroidota	Sphingobacteriia	Sphingobacteriales	Sphingobacteriaceae	Sphingobacterium	Sphingobacterium sp. KACC 22765	Yes	Yes	Environmental	Terrestrial	Unclassified	Soil	Unclassified	South Korea: Gyeongsangnam-do, Miryang-si		5170823	4453
3007003276	Bacteria	Permanent Draft	Bacillus sp. 03113 genome sequencing	Bacillus sp. 03113	Chinese Academy of Agricultural Sciences	3007003276	Bacillota	Bacilli	Bacillales	Bacillaceae	Bacillus	Bacillus sp. 03113	Yes	Yes	Environmental	Terrestrial	Greenhouse	Soil	Unclassified	China: Wangsiying, Chaoyang District, Beijing		4243931	4399
3004182270	Bacteria	Permanent Draft	Mesorhizobia in Australia	Mesorhizobium sp. B2-4-19	Curtin University	3004182270	Pseudomonadota	Alphaproteobacteria	Hyphomicrobiales	Phyllobacteriaceae	Mesorhizobium	Mesorhizobium sp. B2-4-19	Yes	Yes	Environmental	Terrestrial	Unclassified	Soil	Unclassified	Australia: WA, Badgingarra		6255744	6274
2775507132	Bacteria	Permanent Draft	Streptomyces griseorubiginosus strain:DSM 40469 Genome sequencing and assembly	Streptomyces griseorubiginosus DSM 40469	Bielefeld University	2775507132	Actinomycetota	Actinomycetes	Kitasatosporales	Streptomycetaceae	Streptomyces	Streptomyces griseorubiginosus	Yes	Yes	Environmental	Terrestrial	Unclassified	Soil	Unclassified			9842611	8760
8067036346	Bacteria	Finished	Dyadobacter chenhuakuii CY22 genome sequencing	Dyadobacter chenhuakuii CY22	Chinese Center for Disease Control and Prevention	8067036346	Bacteroidota	Cytophagia	Cytophagales	Spirosomataceae	Dyadobacter	Dyadobacter chenhuakuii	Yes	Yes	Environmental	Terrestrial	Unclassified	Soil	Unclassified	China: Qinghai		6083856	5286
2547132467	Bacteria	Finished	Paracoccus aminophilus JCM 7686 Genome sequencing	Paracoccus aminophilus JCM 7686	University of Warsaw	2547132467	Pseudomonadota	Alphaproteobacteria	Rhodobacterales	Paracoccaceae	Paracoccus	Paracoccus aminophilus	Yes	Yes	Environmental	Terrestrial	Garden	Soil	Unclassified	Japan	Soil	4917798	4642
2894166119	Bacteria	Permanent Draft	Genome sequencing of Cohnella luojiensis CCTCC AB 208254	Cohnella luojiensis CCTCC AB 208254	Affliated Hospital of Zunyi Medical College	2894166119	Bacillota	Bacilli	Bacillales	Paenibacillaceae	Cohnella	Cohnella luojiensis	Yes	Yes	Environmental	Terrestrial	Unclassified	Soil	Unclassified	China:Xinjiang		5049922	5010
2832125735	Bacteria	Permanent Draft	Genomes of Corallococcus strains isolated from Aberystwtyh and Carmarthen Areas United Kingdom	Corallococcus sp. AB032C	Aberystwyth University	2832125735	Myxococcota	Myxococcia	Myxococcales	Myxococcaceae	Corallococcus	Corallococcus sp. AB032C	Yes	Yes	Environmental	Terrestrial	Unclassified	Soil	Unclassified	United Kingdom		10447292	8584
8086849761	Bacteria	Permanent Draft	Streptomyces sp. H27-C3 genome sequencing	Streptomyces sp. H27-C3	Yildiz Technical University	8086849761	Actinomycetota	Actinomycetes	Kitasatosporales	Streptomycetaceae	Streptomyces	Streptomyces sp. H27-C3	Yes	Yes	Environmental	Terrestrial	Unclassified	Soil	Unclassified	Antarctica: Horseshoe Island		8023791	7858
2534682116	Bacteria	Permanent Draft	Bacillus inaquosorum KCTC 13429	Bacillus inaquosorum KCTC 13429	Chung-Ang University	2534682116	Bacillota	Bacilli	Bacillales	Bacillaceae	Bacillus	Bacillus inaquosorum	Yes	Yes	Environmental	Terrestrial	Unclassified	Soil	Desert	Death Valley, CA, USA		4342448	4505
8002583844	Bacteria	Permanent Draft	Roseomonas sp. SSH11 genome sequencing	Roseomonas baculiformis SSH11	Dongguk University	8002583844	Pseudomonadota	Alphaproteobacteria	Rhodospirillales	Acetobacteraceae	Pararoseomonas	Pararoseomonas baculiformis	Yes	Yes	Environmental	Terrestrial	Paddy field/soil	Soil	Unclassified	South Korea; Goyang		5249860	5073
2811995369	Bacteria	Finished	Genome sequencing of Bacillus clausii DSM 8716	Alkalihalobacillus clausii DSM 8716	Kyungpook National University	2811995369	Bacillota	Bacilli	Bacillales	Bacillaceae	Shouchella	Shouchella clausii	Yes	Yes	Environmental	Terrestrial	Unclassified	Soil	Unclassified		Soil	4517459	4576
2857074237	Bacteria	Finished	Streptomyces sp. MK-45 genome sequencing	Streptomyces cyaneochromogenes MK-45	Hunan University	2857074237	Actinomycetota	Actinomycetes	Kitasatosporales	Streptomycetaceae	Streptomyces	Streptomyces cyaneochromogenes	Yes	Yes	Environmental	Terrestrial	Unclassified	Soil	Unclassified	China: Hunan		10677137	9665
645058827	Bacteria	Permanent Draft	Streptomyces roseosporus NRRL 11379	Streptomyces filamentosus NRRL 11379	Broad Institute	645058827	Actinomycetota	Actinomycetes	Kitasatosporales	Streptomycetaceae	Streptomyces	Streptomyces filamentosus	Yes	Yes	Environmental	Terrestrial	Unclassified	Soil	Unclassified		Soil	7763119	7141
2957084366	Bacteria	Permanent Draft	Large-scale bioinformatics analysis of Bacillus genomes	Priestia megaterium AFS044352	University of North Carolina, Chapel Hill	2957084366	Bacillota	Bacilli	Bacillales	Bacillaceae	Priestia	Priestia megaterium	Yes	Yes	Environmental	Terrestrial	Unclassified	Soil	Unclassified	USA: Iowa		5127880	5601
2910707460	Bacteria	Permanent Draft	Genome Sequencing of Rufibacter sp. XAAS-G3-1	Rufibacter sp. XAAS-G3-1	Institute of Microbiology	2910707460	Bacteroidota	Cytophagia	Cytophagales	Hymenobacteraceae	Rufibacter	Rufibacter sp. XAAS-G3-1	Yes	Yes	Environmental	Terrestrial	Unclassified	Soil	Unclassified	China: Heshuo County, Xinjiang		5296800	4351
8011200657	Bacteria	Permanent Draft	Pseudomonas fluorescens HKI0874 genome sequencing	Pseudomonas fluorescens HKI0874	Leibniz Institute for Natural Product Research and Infection Biology	8011200657	Pseudomonadota	Gammaproteobacteria	Pseudomonadales	Pseudomonadaceae	Pseudomonas	Pseudomonas fluorescens	Yes	Yes	Environmental	Terrestrial	Unclassified	Soil	Unclassified	Germany: Forest near Ammerbach, Jena		6954842	6435
3003540143	Bacteria	Permanent Draft	Genome sequencing to further insight into bacterial adaptation of environment and study on the phylogeny of them	Pedobacter sp. SYSU D00823	Sun Yat-Sen University	3003540143	Bacteroidota	Sphingobacteriia	Sphingobacteriales	Sphingobacteriaceae	Pedobacter	Pedobacter sp. SYSU D00823	Yes	Yes	Environmental	Terrestrial	Desert	Soil	Unclassified	China: Xinjiang		6187183	5256
2921339674	Bacteria	Permanent Draft	Whole-genome sequencing of Achromobacter type and reference strains	Achromobacter kerstersii LMG 3441	Ghent University	2921339674	Pseudomonadota	Betaproteobacteria	Burkholderiales	Alcaligenaceae	Achromobacter	Achromobacter kerstersii	Yes	Yes	Environmental	Terrestrial	Unclassified	Soil	Unclassified			7020072	6411
2883400621	Bacteria	Finished	Changchengzhania lutea SM1355 genome sequencing	Changchengzhania lutea SM1355	State Key Laboratory of Microbial Technology, Marine Biotechnology Research Center, Shandong Univers	2883400621	Bacteroidota	Flavobacteriia	Flavobacteriales	Flavobacteriaceae	Changchengzhania	Changchengzhania lutea	Yes	Yes	Environmental	Terrestrial	Sand	Soil	Unclassified	Antarctica		4130958	3883
2938008539	Bacteria	Permanent Draft	Mesorhizobia in Australia	Mesorhizobium sp. CU2	Curtin University	2938008539	Pseudomonadota	Alphaproteobacteria	Hyphomicrobiales	Phyllobacteriaceae	Mesorhizobium	Mesorhizobium sp. CU2	Yes	Yes	Environmental	Terrestrial	Unclassified	Soil	Unclassified	Australia: Perth, Curtin Univerisity Garden		6304386	6270
2907171353	Bacteria	Permanent Draft	Genomic analysis of bacteria from Moroccan desert	Paenibacillus lautus MDMC362	Faculty of medecine and pharmacy (FMP-Rabat)	2907171353	Bacillota	Bacilli	Bacillales	Paenibacillaceae	Paenibacillus	Paenibacillus lautus	Yes	Yes	Environmental	Terrestrial	Sand	Soil	Unclassified	Morocco: Merzouga		6847369	6436
2898364685	Bacteria	Permanent Draft	Bacteria Genome sequencing	Mucilaginibacter sp. L196	Institute of Microbiology of the AS CR	2898364685	Bacteroidota	Sphingobacteriia	Sphingobacteriales	Sphingobacteriaceae	Mucilaginibacter	Mucilaginibacter sp. L196	Yes	Yes	Environmental	Terrestrial	Unclassified	Soil	Unclassified	Czech Republic		5331597	4681
2898208326	Bacteria	Permanent Draft	Pandoraea sp. LMG 31014 genome sequencing	Pandoraea sp. LMG 31014	Ghent University	2898208326	Pseudomonadota	Betaproteobacteria	Burkholderiales	Burkholderiaceae	Pandoraea	Pandoraea soli	Yes	Yes	Environmental	Terrestrial	Unclassified	Soil	Unclassified			4961982	4543
2881966637	Bacteria	Permanent Draft	Spirosoma sordidisoli TY50 genome sequencing	Spirosoma sordidisoli TY50	Nanjing Agricultural University	2881966637	Bacteroidota	Cytophagia	Cytophagales	Cytophagaceae	Spirosoma	Spirosoma sordidisoli	Yes	Yes	Environmental	Terrestrial	Unclassified	Soil	Unclassified	China		7367609	6354
2894545341	Bacteria	Permanent Draft	Pontibacter fetidus BT213 genome sequencing	Pontibacter fetidus BT213	Seoul Womens University	2894545341	Bacteroidota	Cytophagia	Cytophagales	Hymenobacteraceae	Pontibacter	Pontibacter fetidus	Yes	Yes	Environmental	Terrestrial	Unclassified	Soil	Unclassified	South Korea: Uijeongbu-Si		4072018	3636
8062808869	Bacteria	Finished	Ferruginibacter albus KIS38-8 genome sequencing	Ferruginibacter albus KIS38-8	National Institute of Agricultural Science	8062808869	Bacteroidota	Chitinophagia	Chitinophagales	Chitinophagaceae	Ferruginibacter	Ferruginibacter albus	Yes	Yes	Environmental	Terrestrial	Unclassified	Soil	Unclassified	South Korea: Heuksan-myeon, Sinan-gun, Jeollanam-do		3760165	3296
2888084233	Bacteria	Finished	Methylobacterium sp. XJLW genome sequencing	Methylobacterium sp. XJLW	Zhejiang University	2888084233	Pseudomonadota	Alphaproteobacteria	Hyphomicrobiales	Methylobacteriaceae	Methylobacterium	Methylobacterium sp. XJLW	Yes	Yes	Environmental	Terrestrial	Unclassified	Soil	Unclassified	China: Hangzhou, Zhejiang		6666616	6457
2775506969	Bacteria	Finished	Gordonia sp. 1D genome sequencing	Gordonia sp. 1D	Skryabin Institute of Biochemistry and Physiology of Microorganisms	2775506969	Actinomycetota	Actinomycetes	Mycobacteriales	Gordoniaceae	Gordonia	Gordonia sp. 1D	Yes	Yes	Environmental	Terrestrial	Garden	Soil	Unclassified	Russia: Moscow region		5151623	4728
2571042632	Bacteria	Permanent Draft	Halomonas huangheensis BJGMM-B45 Genome sequencing	Halomonas huangheensis BJGMM-B45	Chinese Academy of Agricultural Sciences	2571042632	Pseudomonadota	Gammaproteobacteria	Oceanospirillales	Halomonadaceae	Halomonas	Halomonas huangheensis	Yes	Yes	Environmental	Terrestrial	Unclassified	Soil	Unclassified			4758798	4294
2663762822	Bacteria	Permanent Draft	Genome sequencing of a diverse group of Burkholderia pseudomallei strains	Burkholderia pseudomallei 77/96	Wellcome Trust Sanger Institute	2663762822	Pseudomonadota	Betaproteobacteria	Burkholderiales	Burkholderiaceae	Burkholderia	Burkholderia pseudomallei	Yes	Yes	Environmental	Terrestrial	Unclassified	Soil	Unclassified			7041325	5861
8053544956	Bacteria	Draft	Clostridium absonum DSM 599 genome sequencing	Clostridium absonum DSM 599	Brigham and Womens Hospital, Harvard Medical School	8053544956	Bacillota	Clostridia	Eubacteriales	Clostridiaceae	Clostridium	Clostridium sardiniense	Yes	Yes	Environmental	Terrestrial	Unclassified	Soil	Unclassified		Soil	3942322	3987
2609459902	Bacteria	Permanent Draft	Mesobacillus boroniphilus JCM 21738	Mesobacillus boroniphilus JCM 21738	University of Tokyo	2609459902	Bacillota	Bacilli	Bacillales	Bacillaceae	Mesobacillus	Mesobacillus boroniphilus	No	Yes	Environmental	Terrestrial	Unclassified	Soil	Unclassified	Turkey	Soil	4364535	5420
2997124701	Bacteria	Permanent Draft	Clostridium pasteurianum GL11 genome sequencing	Clostridium pasteurianum GL11	Nanjing University of Technology	2997124701	Bacillota	Clostridia	Eubacteriales	Clostridiaceae	Clostridium	Clostridium pasteurianum	Yes	Yes	Environmental	Terrestrial	Unclassified	Soil	Unclassified	China: Shandong		4677181	4414
2831233980	Bacteria	Finished	Serratia sp. PKL:12 GENOME SEQUENCING	Serratia quinivorans PKL:12	CSIR-Institute of Himalayan Bioresource Technology	2831233980	Pseudomonadota	Gammaproteobacteria	Enterobacterales	Yersiniaceae	Serratia	Serratia quinivorans	Yes	Yes	Environmental	Terrestrial	Unclassified	Soil	Agricultural land			5292949	5082
2968493124	Bacteria	Permanent Draft	Sequencing as part of the GlobE Evolution project	Leptospira gomenensis 201800298	INRS - Institute Armand Frappier	2968493124	Spirochaetota	Spirochaetia	Leptospirales	Leptospiraceae	Leptospira	Leptospira gomenensis	Yes	Yes	Environmental	Terrestrial	Unclassified	Soil	Unclassified	New Caledonia		4184424	3972
2980480144	Bacteria	Finished	Bacillus velezensis UTB96 genome sequencing	Bacillus velezensis UTB96	University of Hohenheim	2980480144	Bacillota	Bacilli	Bacillales	Bacillaceae	Bacillus	Bacillus velezensis	Yes	Yes	Environmental	Terrestrial	Unclassified	Soil	Unclassified	Iran		3715675	3774
2920292642	Bacteria	Permanent Draft	Genome Sequencing of Pseudaminobacter sp. HC 19	Pseudaminobacter soli HC19	Nanjing Agricultural University	2920292642	Pseudomonadota	Alphaproteobacteria	Hyphomicrobiales	Phyllobacteriaceae	Pseudaminobacter	Pseudaminobacter soli	Yes	Yes	Environmental	Terrestrial	Unclassified	Soil	Unclassified	China: HeChi		6106750	6048
2791355255	Bacteria	Permanent Draft	Rhizobium arenae MIM27 genome sequencing	Rhizobium arenae MIM27	Applied and Environmental Microbiology	2791355255	Pseudomonadota	Alphaproteobacteria	Hyphomicrobiales	Rhizobiaceae	Pararhizobium	Pararhizobium arenae	Yes	Yes	Environmental	Terrestrial	Garden	Soil	Unclassified	China: Maowusu		4933054	4769
2627854173	Bacteria	Finished	Genome sequencing project of agriculturally useful microbes	Paenibacillus beijingensis DSM 24997	Kyungpook National University	2627854173	Bacillota	Bacilli	Bacillales	Paenibacillaceae	Paenibacillus	Paenibacillus beijingensis	Yes	Yes	Environmental	Terrestrial	Unclassified	Soil	Unclassified			5749967	5294
2972064844	Bacteria	Finished	Pseudomonas entomophila 2014 genome sequencing	Pseudomonas entomophila 2014	Shanghai Jiao Tong University	2972064844	Pseudomonadota	Gammaproteobacteria	Pseudomonadales	Pseudomonadaceae	Pseudomonas	Pseudomonas entomophila	Yes	Yes	Environmental	Terrestrial	Unclassified	Soil	Unclassified	China: chengdu		5686346	5226
2980618641	Bacteria	Finished	Pseudomonas sp. DTU12.1 genome sequencing	Pseudomonas sp. DTU12.1	Technical University of Denmark	2980618641	Pseudomonadota	Gammaproteobacteria	Pseudomonadales	Pseudomonadaceae	Pseudomonas	Pseudomonas sp. DTU12.1	Yes	Yes	Environmental	Terrestrial	Unclassified	Soil	Unclassified	Denmark		5943629	5433
2907736429	Bacteria	Finished	Burkholderia Genome sequencing - Northern Arizona University	Burkholderia cepacia INT3-BP177	Northern Arizona University	2907736429	Pseudomonadota	Betaproteobacteria	Burkholderiales	Burkholderiaceae	Burkholderia	Burkholderia cepacia	Yes	Yes	Environmental	Terrestrial	Unclassified	Soil	Unclassified	Thailand: Ubon		7337382	6740
2915559927	Bacteria	Permanent Draft	Genome Sequencing of Brevibacillus sp. MS2.2	Brevibacillus sp. MS2.2	Nord Reet UG, Greifswald, Germany	2915559927	Bacillota	Bacilli	Bacillales	Paenibacillaceae	Brevibacillus	Brevibacillus sp. MS2.2	Yes	Yes	Environmental	Terrestrial	Unclassified	Soil	Agricultural land	Viet Nam: Phu An, Thanh Da, Phuc Tho		6273578	6116
8038950529	Bacteria	Permanent Draft	Burkholderia Genome sequencing - Northern Arizona University	Burkholderia cepacia INT3-BP121	Northern Arizona University	8038950529	Pseudomonadota	Betaproteobacteria	Burkholderiales	Burkholderiaceae	Burkholderia	Burkholderia cepacia	Yes	Yes	Environmental	Terrestrial	Unclassified	Soil	Unclassified	Thailand: Ubon		8732585	8235
8038720401	Bacteria	Permanent Draft	Burkholderia Genome sequencing - Northern Arizona University	Burkholderia cepacia MSMB1224	Northern Arizona University	8038720401	Pseudomonadota	Betaproteobacteria	Burkholderiales	Burkholderiaceae	Burkholderia	Burkholderia cepacia	Yes	Yes	Environmental	Terrestrial	Unclassified	Soil	Unclassified	Australia: Tanami East, Northern Territory		8449013	7873
8023347326	Bacteria	Permanent Draft	Bacillus sp. AR8-1 genome sequencing	Bacillus sp. AR8-1	University of Bialystok	8023347326	Bacillota	Bacilli	Bacillales	Bacillaceae	Bacillus	Bacillus sp. AR8-1	Yes	Yes	Environmental	Terrestrial	Unclassified	Soil	Unclassified	Argentina: Buenos Aires, a tawn park		5699974	6000
2909805514	Bacteria	Permanent Draft	Genome Sequencing of Holosporaceae bacterium Namur	Holosporaceae bacterium Namur	IHU Mediteranee Infection	2909805514	Pseudomonadota	Alphaproteobacteria	Holosporales	Holosporaceae	unclassified	Holosporaceae bacterium Namur	Yes	Yes	Environmental	Terrestrial	Fossil	Soil	Unclassified	France		1928597	1813
2754412390	Bacteria	Permanent Draft	Burkholderia Genome sequencing - Northern Arizona University	Burkholderia sp. BDU5	Northern Arizona University	2754412390	Pseudomonadota	Betaproteobacteria	Burkholderiales	Burkholderiaceae	Burkholderia	Burkholderia sp. BDU5	Yes	Yes	Environmental	Terrestrial	Unclassified	Soil	Unclassified	Australia: Badu Island, Torres Strait		6623468	5952
2885814250	Bacteria	Permanent Draft	Population genomics tropical Pseudomonas	Pseudomonas sp. R31(2017)	University of Sao Paulo	2885814250	Pseudomonadota	Gammaproteobacteria	Pseudomonadales	Pseudomonadaceae	Pseudomonas	Pseudomonas sp. R31(2017)	Yes	Yes	Environmental	Terrestrial	Loam	Soil	Agricultural soil	Brazil: Piracicaba, Sao Paulo		6269031	5900
8048033489	Bacteria	Finished	Nonomuraea gerenzanensis L70 genome sequencing	Nonomuraea gerenzanensis L70	Institute of Biotechnology, Zhejiang University	8048033489	Actinomycetota	Actinomycetes	Streptosporangiales	Streptosporangiaceae	Nonomuraea	Nonomuraea gerenzanensis	Yes	Yes	Environmental	Terrestrial	Unclassified	Soil	Unclassified	China: Hangzhou	Soil	12066052	11389
2882785813	Bacteria	Permanent Draft	Chitinophaga sp. XJ-2 genome sequencing	Chitinophaga deserti XJ-2	Nanjing Agricultural University	2882785813	Bacteroidota	Chitinophagia	Chitinophagales	Chitinophagaceae	Chitinophaga	Chitinophaga deserti	Yes	Yes	Environmental	Terrestrial	Unclassified	Soil	Unclassified	China: Gurbantunggut Sandy Desert		6329522	5230
645951849	Bacteria	Permanent Draft	Streptomyces sp. SPB78	Streptomyces sp. SPB78	Broad Institute	645951849	Actinomycetota	Actinomycetes	Kitasatosporales	Streptomycetaceae	Streptomyces	Streptomyces sp. SPB78	Yes	Yes	Environmental	Terrestrial	Unclassified	Soil	Unclassified		Soil	6897976	6544
2910256470	Bacteria	Finished	Genome Sequencing of Alloacidobacterium dinghuense 4Y35	Alloacidobacterium dinghuense 4Y35	Sun Yat-Sen University	2910256470	Acidobacteriota	Terriglobia	Terriglobales	Acidobacteriaceae	Alloacidobacterium	Alloacidobacterium dinghuense	Yes	Yes	Environmental	Terrestrial	Temperate forest	Soil	Mineral soil	China: Guangdong province		6271114	5626
2808606867	Bacteria	Permanent Draft	Burkholderia Genome sequencing - Northern Arizona University	Burkholderia ubonensis MSMB1754	Northern Arizona University	2808606867	Pseudomonadota	Betaproteobacteria	Burkholderiales	Burkholderiaceae	Burkholderia	Burkholderia ubonensis	Yes	Yes	Environmental	Terrestrial	Unclassified	Soil	Unclassified			7589567	6826
2890268774	Bacteria	Permanent Draft	Empedobacter haloabium ATCC 31962 genome sequencing	Empedobacter haloabium ATCC 31962	University of Tuebingen	2890268774	Pseudomonadota	Betaproteobacteria	Burkholderiales	Oxalobacteraceae	unclassified	[Empedobacter] haloabium	Yes	Yes	Environmental	Terrestrial	Unclassified	Soil	Unclassified	Japan: Tokyo, Yamate-Dori		6678028	5971
2883763884	Bacteria	Permanent Draft	Saccharibacillus sp. O16 genome sequencing	Saccharibacillus sp. O16	Institute of Microbial Technology	2883763884	Bacillota	Bacilli	Bacillales	Paenibacillaceae	Saccharibacillus	Saccharibacillus sp. O16	Yes	Yes	Environmental	Terrestrial	Unclassified	Soil	Unclassified	India: Khetri copper mine, Rajasthan		5716101	5087
2920874374	Bacteria	Permanent Draft	Genome Sequencing of Hymenobacter citatus BT507	Hymenobacter citatus BT507	Seoul Womens University	2920874374	Bacteroidota	Cytophagia	Cytophagales	Hymenobacteraceae	Hymenobacter	Hymenobacter citatus	Yes	Yes	Environmental	Terrestrial	Unclassified	Soil	Unclassified	South Korea: Gyeonggi		5078289	4261
8038494412	Bacteria	Permanent Draft	Burkholderia Genome sequencing - Northern Arizona University	Burkholderia territorii MSMB1821	Northern Arizona University	8038494412	Pseudomonadota	Betaproteobacteria	Burkholderiales	Burkholderiaceae	Burkholderia	Burkholderia territorii	Yes	Yes	Environmental	Terrestrial	Unclassified	Soil	Unclassified	Australia: Tanami East, Northern Territory		6666506	6121
2519899712	Bacteria	Permanent Draft	Antarctic Arthrobacter	Arthrobacter sp. H14	Macrogen, University of Auckland	2519899712	Actinomycetota	Actinomycetes	Micrococcales	Micrococcaceae	Arthrobacter	Arthrobacter sp. H14	Yes	Yes	Environmental	Terrestrial	Unclassified	Soil	Unclassified	Hatherton, Darwin Mountains, Antarctica	Soil	4340329	4633
2884469456	Bacteria	Finished	Geobacter sp. FeAm09 genome sequencing	Geobacter sp. FeAm09	University of Nebraska	2884469456	Thermodesulfobacteriota	Desulfuromonadia	Geobacterales	Geobacteraceae	Geobacter	Geobacter sp. FeAm09	Yes	Yes	Environmental	Terrestrial	Unclassified	Soil	Unclassified	Puerto Rico		4099068	4033
8002348527	Bacteria	Permanent Draft	Alkalihalobacillus sp. BA299 genome sequencing	Alkalihalobacillus sp. BA299	WooSong University	8002348527	Bacillota	Bacilli	Bacillales	Bacillaceae	Alkalihalobacillus	Alkalihalobacillus sp. BA299	Yes	Yes	Environmental	Terrestrial	Salt flat/Salt pan	Soil	Unclassified	South Korea: Taean		5137563	5341
2731957586	Bacteria	Permanent Draft	Microbacterium hydrocarbonoxydans NBRC 103074	Microbacterium hydrocarbonoxydans NBRC 103074	National Institute of Technology and Evaluation	2731957586	Actinomycetota	Actinomycetes	Micrococcales	Microbacteriaceae	Microbacterium	Microbacterium hydrocarbonoxydans	Yes	Yes	Environmental	Terrestrial	Unclassified	Soil	Oil-contaminated		Soil	3474616	3417
2757320885	Bacteria	Finished	Genome sequencing of Sinomonas sp. R1AF57	Sinomonas sp. R1AF57	University of Sao Paulo	2757320885	Actinomycetota	Actinomycetes	Micrococcales	Micrococcaceae	Sinomonas	Sinomonas sp. R1AF57	Yes	Yes	Environmental	Terrestrial	Unclassified	Soil	Unclassified	Brazil: Rondonia state		3939870	3692
2958857977	Bacteria	Permanent Draft	Leptospira spp. from tropical soils.	Leptospira haakeii ATI7-C-A2	Institut Pasteur Montevideo	2958857977	Spirochaetota	Spirochaetia	Leptospirales	Leptospiraceae	Leptospira	Leptospira haakeii	Yes	Yes	Environmental	Terrestrial	Unclassified	Soil	Unclassified	New Caledonia		4191631	3906
2786546122	Bacteria	Permanent Draft	Bacillus subtilis DM2	Bacillus subtilis DM2	Institute of Biotechnology CAS	2786546122	Bacillota	Bacilli	Bacillales	Bacillaceae	Bacillus	Bacillus subtilis	Yes	Yes	Environmental	Terrestrial	Contaminated	Soil	Unclassified			4322871	4479
2775507154	Bacteria	Permanent Draft	Large-scale bioinformatics analysis of Bacillus genomes	Bacillus sp. AFS002410	University of North Carolina, Chapel Hill	2775507154	Bacillota	Bacilli	Bacillales	Bacillaceae	Bacillus	Bacillus sp. AFS002410	Yes	Yes	Environmental	Terrestrial	Unclassified	Soil	Unclassified	USA: New York		5543728	5201
8033908878	Bacteria	Permanent Draft	Genome sequencing of Streptomyces type strains - USDA	Streptomyces fradiae NRRL B-1195	USDA/ARS/NCAUR	8033908878	Actinomycetota	Actinomycetes	Kitasatosporales	Streptomycetaceae	Streptomyces	Streptomyces fradiae	Yes	Yes	Environmental	Terrestrial	Unclassified	Soil	Unclassified	USA		6090486	6204
2835173708	Bacteria	Permanent Draft	Sporomusa silvacetica DSM 10669 genome sequencing	Sporomusa silvacetica DSM 10669	Georg-August-University Goettingen, Genomic and Applied Microbiology, Goettingen Genomics Laboratory, Goettingen Genomics Laboratory	2835173708	Bacillota	Negativicutes	Selenomonadales	Sporomusaceae	Sporomusa	Sporomusa silvacetica	Yes	Yes	Environmental	Terrestrial	Unclassified	Soil	Unclassified	Geisberg, Germany	Soil	5929109	6220
2962286162	Bacteria	Finished	Bacillus subtilis subtilis NCD-2 genome sequencing	Bacillus subtilis subtilis NCD-2	Institute of Plant Protection	2962286162	Bacillota	Bacilli	Bacillales	Bacillaceae	Bacillus	Bacillus subtilis	Yes	Yes	Environmental	Terrestrial	Garden	Soil	Unclassified	China: Hebei		4192617	4469
8038869226	Bacteria	Permanent Draft	Burkholderia Genome sequencing - Northern Arizona University	Burkholderia cepacia MSMB1329WGS	Northern Arizona University	8038869226	Pseudomonadota	Betaproteobacteria	Burkholderiales	Burkholderiaceae	Burkholderia	Burkholderia cepacia	Yes	Yes	Environmental	Terrestrial	Unclassified	Soil	Unclassified	Australia: Tanami East, Northern Territory		8388857	7852
8022803076	Bacteria	Permanent Draft	ISURF NH-INBRE 2018 Genome Sequencing	Bacillus sp. dmp5	Colby Sawyer College	8022803076	Bacillota	Bacilli	Bacillales	Bacillaceae	Bacillus	Bacillus sp. dmp5	Yes	Yes	Environmental	Terrestrial	Unclassified	Soil	Unclassified	USA: New Hampshire, Town of Hanover, park adjacent to Geisel Medical School		5718222	6079
2754412309	Bacteria	Permanent Draft	Burkholderia Genome sequencing - Northern Arizona University	Burkholderia stagnalis MSMB808WGS	Northern Arizona University	2754412309	Pseudomonadota	Betaproteobacteria	Burkholderiales	Burkholderiaceae	Burkholderia	Burkholderia stagnalis	Yes	Yes	Environmental	Terrestrial	Unclassified	Soil	Unclassified	Australia: Tanami East, Northern Territory		7556806	6839
8074263624	Bacteria	Finished	Diaphorobacter sp. LI3 genome sequencing	Diaphorobacter sp. LI3	South China Normal University	8074263624	Pseudomonadota	Betaproteobacteria	Burkholderiales	Comamonadaceae	Diaphorobacter	Diaphorobacter sp. LI3	Yes	Yes	Environmental	Terrestrial	Unclassified	Soil	Unclassified	China: South China Botanical Garden		4251417	4051
2822126522	Bacteria	Permanent Draft	Large-scale bioinformatics analysis of Bacillus genomes	Bacillus toyonensis AFS006579	University of North Carolina, Chapel Hill	2822126522	Bacillota	Bacilli	Bacillales	Bacillaceae	Bacillus	Bacillus toyonensis	Yes	Yes	Environmental	Terrestrial	Unclassified	Soil	Unclassified	USA: New York		5539290	5839
2802429631	Bacteria	Permanent Draft	Noviherbaspirillum denitrificans TSA40 genome sequencing	Noviherbaspirillum denitrificans TSA40	University of Minnesota	2802429631	Pseudomonadota	Betaproteobacteria	Burkholderiales	Oxalobacteraceae	Noviherbaspirillum	Noviherbaspirillum denitrificans	Yes	Yes	Environmental	Terrestrial	Paddy field/soil	Soil	Unclassified	Japan: Tokyo		5798956	5582
2808606846	Bacteria	Permanent Draft	Burkholderia Genome sequencing - Northern Arizona University	Burkholderia ubonensis MSMB2120WGS	Northern Arizona University	2808606846	Pseudomonadota	Betaproteobacteria	Burkholderiales	Burkholderiaceae	Burkholderia	Burkholderia ubonensis	Yes	Yes	Environmental	Terrestrial	Unclassified	Soil	Unclassified	Australia: Tanami East, Northern Territory		7792297	7163
2874694145	Bacteria	Permanent Draft	Sphingomonas haloaromaticamans P3 genome sequencing	Sphingomonas haloaromaticamans P3	University of South Australia	2874694145	Pseudomonadota	Alphaproteobacteria	Sphingomonadales	Sphingomonadaceae	Sphingomonas	Sphingomonas haloaromaticamans	Yes	Yes	Environmental	Terrestrial	Unclassified	Soil	Unclassified	Greece: Agia, Larissa		4923741	4771
8038806342	Bacteria	Permanent Draft	Burkholderia Genome sequencing - Northern Arizona University	Burkholderia cepacia MSMB1224WGS	Northern Arizona University	8038806342	Pseudomonadota	Betaproteobacteria	Burkholderiales	Burkholderiaceae	Burkholderia	Burkholderia cepacia	Yes	Yes	Environmental	Terrestrial	Unclassified	Soil	Unclassified	Australia: Tanami East, Northern Territory		8449153	7854
2754412365	Bacteria	Permanent Draft	Burkholderia Genome sequencing - Northern Arizona University	Burkholderia sp. RF2-non_BP3	Northern Arizona University	2754412365	Pseudomonadota	Betaproteobacteria	Burkholderiales	Burkholderiaceae	Burkholderia	Burkholderia sp. RF2-non_BP3	Yes	Yes	Environmental	Terrestrial	Unclassified	Soil	Unclassified	Thailand: Ubon, Trakam		7357287	6681
8083389017	Bacteria	Finished	Planococcus sp. N022 genome sequencing	Planococcus sp. N022	Chinese Center for Disease Control and Prevention (China CDC)	8083389017	Bacillota	Bacilli	Bacillales	Planococcaceae	Planococcus	Planococcus sp. N022	Yes	Yes	Environmental	Terrestrial	Unclassified	Soil	Unclassified	China: Qinghai Province		4019851	4094
2884940763	Bacteria	Finished	Lysobacter alkalisoli SJ-36 genome sequencing	Lysobacter alkalisoli SJ-36	Inner Mongolia University	2884940763	Pseudomonadota	Gammaproteobacteria	Xanthomonadales	Xanthomonadaceae	Lysobacter	Lysobacter alkalisoli	Yes	Yes	Environmental	Terrestrial	Unclassified	Soil	Unclassified	China: Inner Mongolia		3857091	3511
2987472655	Bacteria	Finished	Genome sequence of Methylobacterium sp. 17Sr1-1	Methylobacterium sp. 17Sr1-1		2987472655	Pseudomonadota	Alphaproteobacteria	Hyphomicrobiales	Methylobacteriaceae	Methylobacterium	Methylobacterium sp. 17Sr1-1	Yes	Yes	Environmental	Terrestrial	Unclassified	Soil	Unclassified	Seoul, South Korea		6542583	6143
2851870198	Bacteria	Finished	Streptomyces sp. ETH9427 genome sequencing	Streptomyces sp. ETH9427	Universite de Lorraine	2851870198	Actinomycetota	Actinomycetes	Kitasatosporales	Streptomycetaceae	Streptomyces	Streptomyces sp. ETH9427	Yes	Yes	Environmental	Terrestrial	Unclassified	Soil	Unclassified	Switzerland		7978031	7315
2910373999	Bacteria	Finished	Genome Sequencing of Nakamurella sp. PAMC28650	Nakamurella sp. PAMC28650	Korea University	2910373999	Actinomycetota	Actinomycetes	Nakamurellales	Nakamurellaceae	Nakamurella	Nakamurella sp. PAMC28650	Yes	Yes	Environmental	Terrestrial	Unclassified	Soil	Unclassified	Antarctica		5629850	5238
2866311706	Bacteria	Permanent Draft	Micromonospora globispora S2903 Genome sequencing	Micromonospora sp. S2903	Newcastle University	2866311706	Actinomycetota	Actinomycetes	Micromonosporales	Micromonosporaceae	Micromonospora	Micromonospora globispora	Yes	Yes	Environmental	Terrestrial	Sand	Soil	Desert	Turkey: Ordu		6453819	7275
2999580628	Bacteria	Permanent Draft	Pseudomarimonas arenosa CAU 1598	Pseudomarimonas arenosa CAU 1598	Chung-Ang University	2999580628	Pseudomonadota	Gammaproteobacteria	Xanthomonadales	Xanthomonadaceae	Pseudomarimonas	Pseudomarimonas arenosa	Yes	Yes	Environmental	Terrestrial	Sand	Soil	Unclassified	South Korea		5494731	4583
2841205229	Bacteria	Finished	Sorangium cellulosum So ce836 genome sequencing	Sorangium cellulosum So ce836	Helmholtz Centre for Infection Research	2841205229	Myxococcota	unclassified	Polyangiales	Polyangiaceae	Sorangium	Sorangium cellulosum	Yes	Yes	Environmental	Terrestrial	Unclassified	Soil	Unclassified			14598830	10996
2840291538	Bacteria	Permanent Draft	Phototrophic genus Antarctica	Sphingomonadaceae bacterium R-67880	University of Oxford	2840291538	Pseudomonadota	Alphaproteobacteria	Sphingomonadales	Sphingomonadaceae	unclassified	unclassified	Yes	Yes	Environmental	Terrestrial	Unclassified	Soil	Unclassified	Sor Rondane Mountains, Antarctica		4360754	4320
2900127139	Bacteria	Permanent Draft	Achromobacter aestuarii KS-M25 genome sequencing	Achromobacter aestuarii KS-M25	Kunsan National University	2900127139	Pseudomonadota	Betaproteobacteria	Burkholderiales	Alcaligenaceae	Achromobacter	Achromobacter aestuarii	Yes	Yes	Environmental	Terrestrial	Unclassified	Soil	Unclassified	South Korea: Jeollanam-do Geum river estuary		5338205	4909
8057480221	Bacteria	Finished	Genome sequences of plant-beneficial Pseudomonas strains with biocontrol activity against lettuce bacterial pathogens	Pseudomonas sichuanensis B21-027	Agriculture and Agri-Food Canada	8057480221	Pseudomonadota	Gammaproteobacteria	Pseudomonadales	Pseudomonadaceae	Pseudomonas	Pseudomonas sichuanensis	Yes	Yes	Environmental	Terrestrial	Agricultural land	Soil	Unclassified	Canada: Frelighsburg, Quebec		5994216	5498
8056276838	Bacteria	Permanent Draft	Thermomonas mangrovi 2C3345 genome sequencing	Thermomonas mangrovi 2C3345	Shenzhen University	8056276838	Pseudomonadota	Gammaproteobacteria	Xanthomonadales	Xanthomonadaceae	Thermomonas	Thermomonas mangrovi	Yes	Yes	Environmental	Terrestrial	Mangrove soil	Soil	Unclassified	China: Shenzhen		2888645	2810
2826855500	Bacteria	Permanent Draft	Large-scale bioinformatics analysis of Bacillus genomes	Bacillus pseudomycoides AFS077577	University of North Carolina, Chapel Hill	2826855500	Bacillota	Bacilli	Bacillales	Bacillaceae	Bacillus	Bacillus pseudomycoides	Yes	Yes	Environmental	Terrestrial	Unclassified	Soil	Unclassified	USA: New York		5672220	6220
2961808095	Bacteria	Permanent Draft	Sequencing as part of the GlobE Evolution project	Leptospira koniambonensis 201800265	INRS - Institute Armand Frappier	2961808095	Spirochaetota	Spirochaetia	Leptospirales	Leptospiraceae	Leptospira	Leptospira koniambonensis	Yes	Yes	Environmental	Terrestrial	Unclassified	Soil	Unclassified	New Caledonia		4319728	4040
8023519376	Bacteria	Permanent Draft	Streptomyces sp. HST21 genome sequencing	Streptomyces altiplanensis HST21	Antofagasta Institute	8023519376	Actinomycetota	Actinomycetes	Kitasatosporales	Streptomycetaceae	Streptomyces	Streptomyces altiplanensis	Yes	Yes	Environmental	Terrestrial	Garden	Soil	Unclassified	Chile		7924348	9171
2558309009	Bacteria	Permanent Draft	Mycobacterium aromaticivorans JS19b1	Mycolicibacterium aromaticivorans JS19b1	Kyungpook National University	2558309009	Actinomycetota	Actinomycetes	Mycobacteriales	Mycobacteriaceae	Mycolicibacterium	Mycolicibacterium aromaticivorans	Yes	Yes	Environmental	Terrestrial	Garden	Soil	Unclassified	Hawaii, United States	Soil	6467941	6384
2894222542	Bacteria	Permanent Draft	Dyadobacter sp. UC 10 genome sequencing	Dyadobacter sp. UC 10	National Centre for Cell Science	2894222542	Bacteroidota	Cytophagia	Cytophagales	Spirosomataceae	Dyadobacter	Dyadobacter sp. UC 10	Yes	Yes	Environmental	Terrestrial	Unclassified	Soil	Unclassified	India: Uttarakhand Gangotri		6925362	5972
2823053753	Bacteria	Permanent Draft	Large-scale bioinformatics analysis of Bacillus genomes	Bacillus toyonensis AFS055090	University of North Carolina, Chapel Hill	2823053753	Bacillota	Bacilli	Bacillales	Bacillaceae	Bacillus	Bacillus toyonensis	Yes	Yes	Environmental	Terrestrial	Unclassified	Soil	Unclassified	USA: New York		5909702	6308
2856988893	Bacteria	Finished	Rhodococcus ruber YC-YT1 genome sequencing	Rhodococcus ruber YC-YT1	Chinese Academy of Agricultural Sciences	2856988893	Actinomycetota	Actinomycetes	Mycobacteriales	Nocardiaceae	Rhodococcus	Rhodococcus ruber	Yes	Yes	Environmental	Terrestrial	Garden	Soil	Unclassified	China: Guangzhou city		5907935	5557
2806310748	Bacteria	Finished	Bacillus siamensis SCSIO 05746 genome sequencing	Bacillus siamensis SCSIO 05746	Institute of Applied Ecology, Chinese Academy of Sciences	2806310748	Bacillota	Bacilli	Bacillales	Bacillaceae	Bacillus	Bacillus siamensis	Yes	Yes	Environmental	Terrestrial	Unclassified	Soil	Unclassified	Indian Ocean		4280711	4432
2767802277	Bacteria	Permanent Draft	Analysing Pseudmonas diversity in wheat fields in United Kingdom	Pseudomonas sp. 44 R 15	JOHN INNES CENTRE, NORWICH, UK.	2767802277	Pseudomonadota	Gammaproteobacteria	Pseudomonadales	Pseudomonadaceae	Pseudomonas	Pseudomonas sp. 44 R 15	Yes	Yes	Environmental	Terrestrial	Unclassified	Soil	Unclassified			6101331	5517
2767802438	Bacteria	Permanent Draft	Sequencing of bacterial isolates from soil warming experiment in Harvard Forest, Massachusetts, USA	Gemmobacter sp. 24YEA27	University of Massachusetts Medical School (UMMS)	2767802438	Pseudomonadota	Alphaproteobacteria	Rhodobacterales	Paracoccaceae	Gemmobacter	Gemmobacter sp.	Yes	Yes	Environmental	Terrestrial	Loam	Soil	Forest soil	Petersham, MA	Forest soil	5082392	5376
2907392014	Bacteria	Permanent Draft	Leptospira spp. from tropical soils.	Leptospira saintgironsiae FH4-C-A2	Institut Pasteur Montevideo	2907392014	Spirochaetota	Spirochaetia	Leptospirales	Leptospiraceae	Leptospira	Leptospira saintgironsiae	Yes	Yes	Environmental	Terrestrial	Unclassified	Soil	Unclassified	New Caledonia		4083319	3832
2897612828	Bacteria	Permanent Draft	Corallococcus silvisoli c25j21 genome sequencing	Corallococcus silvisoli c25j21	Guangdong Institute of Microbiology	2897612828	Myxococcota	Myxococcia	Myxococcales	Myxococcaceae	Corallococcus	Corallococcus silvisoli	Yes	Yes	Environmental	Terrestrial	Unclassified	Soil	Unclassified	China: Chebaling National Nature Reserve, Guangdong Province		9232290	7547
8048213643	Bacteria	Permanent Draft	Polymorphobacter fuscus D40P genome sequencing	Polymorphobacter fuscus D40P	Institute of Microbiology	8048213643	Pseudomonadota	Alphaproteobacteria	Sphingomonadales	Sphingosinicellaceae	Polymorphobacter	Polymorphobacter fuscus	Yes	Yes	Environmental	Terrestrial		Soil				3371741	3247
8053879671	Bacteria	Permanent Draft	Sphingomonas telluris SM33 genome sequencing	Sphingomonas telluris SM33	Hankyong National University	8053879671	Pseudomonadota	Alphaproteobacteria	Sphingomonadales	Sphingomonadaceae	Sphingomonas	Sphingomonas telluris	Yes	Yes	Environmental	Terrestrial	Wetlands	Soil	Unclassified	South Korea: Seoul		3033485	3165
8047829748	Bacteria	Permanent Draft	Chryseobacterium edaphi PBS4-4 genome sequencing	Chryseobacterium edaphi PBS4-4	Dongguk University	8047829748	Bacteroidota	Flavobacteriia	Flavobacteriales	Weeksellaceae	Chryseobacterium	Chryseobacterium edaphi	Yes	Yes	Environmental	Terrestrial	Unclassified	Soil	Unclassified	South Korea: Goyang-si	Soil	4124578	4010
8061443500	Bacteria	Permanent Draft	Large-scale bioinformatics analysis of Bacillus genomes	Bacillus wiedmannii AFS061931	University of North Carolina, Chapel Hill	8061443500	Bacillota	Bacilli	Bacillales	Bacillaceae	Bacillus	Bacillus wiedmannii	Yes	Yes	Environmental	Terrestrial	Unclassified	Soil	Unclassified	USA: New York		5547928	5996
2938582266	Bacteria	Permanent Draft	Sequencing as part of the GlobE Evolution project	Leptospira noumeaensis 201800287	INRS - Institute Armand Frappier	2938582266	Spirochaetota	Spirochaetia	Leptospirales	Leptospiraceae	Leptospira	Leptospira noumeaensis	Yes	Yes	Environmental	Terrestrial	Unclassified	Soil	Unclassified	New Caledonia		4108400	3929
8002588922	Bacteria	Permanent Draft	Roseomonas sp. SG15 genome sequencing	Roseomonas indoligenes SG15	Dongguk University	8002588922	Pseudomonadota	Alphaproteobacteria	Rhodospirillales	Acetobacteraceae	Pararoseomonas	Pararoseomonas indoligenes	Yes	Yes	Environmental	Terrestrial	Paddy field/soil	Soil	Unclassified	South Korea; Goyang		5795801	5637
8004682600	Bacteria	Permanent Draft	Mesorhizobia in Australia	Mesorhizobium sp. B2-4-17	Curtin University	8004682600	Pseudomonadota	Alphaproteobacteria	Hyphomicrobiales	Phyllobacteriaceae	Mesorhizobium	Mesorhizobium sp. B2-4-17	Yes	Yes	Environmental	Terrestrial	Unclassified	Soil	Unclassified	Australia: WA, Badgingarra		6090008	6056
2571042868	Bacteria	Permanent Draft	Whole genome sequencing of Sphingobium barthaii KK22	Sphingobium fuliginis KK22	Japan Agency for Marine-Earth Science and Technology	2571042868	Pseudomonadota	Alphaproteobacteria	Sphingomonadales	Sphingomonadaceae	Sphingobium	Sphingobium fuliginis	Yes	Yes	Environmental	Terrestrial	Unclassified	Soil	Unclassified			4916599	4980
3007877126	Bacteria	Permanent Draft	Genome Sequencing of Pseudomonas tumuqii LAM-KW06	Pseudomonas tumuqii LAM-KW06	Chinese Academy of Agricultural Scineces	3007877126	Pseudomonadota	Gammaproteobacteria	Pseudomonadales	Pseudomonadaceae	Pseudomonas	Pseudomonas tumuqii	Yes	Yes	Environmental	Terrestrial	Unclassified	Soil	Unclassified	China: Beijing		5513010	5107
8052148765	Bacteria	Permanent Draft	Bacillus velezensis GF610 genome sequencing	Bacillus velezensis GF610	Ohio State University	8052148765	Bacillota	Bacilli	Bacillales	Bacillaceae	Bacillus	Bacillus velezensis	Yes	Yes	Environmental	Terrestrial	Garden	Soil	Unclassified			4291535	4515
2910906742	Bacteria	Finished	Genome Sequencing of Aminobacter sp. MDW-2	Aminobacter sp. MDW-2	Nanjing Agricultural University	2910906742	Pseudomonadota	Alphaproteobacteria	Hyphomicrobiales	Phyllobacteriaceae	Aminobacter	Aminobacter sp. MDW-2	Yes	Yes	Environmental	Terrestrial	Unclassified	Soil	Unclassified	China		6607828	6631
2890961847	Bacteria	Permanent Draft	single cell sequences from one soil sample	Nitrospira sp. SCGC AG-212-E16	Iowa State University	2890961847	Nitrospirota	Nitrospiria	Nitrospirales	Nitrospiraceae	Nitrospira	Nitrospira sp. SCGC AG-212-E16	No	Yes	Environmental	Terrestrial	Unclassified	Soil	Unclassified	USA: Maine		2314617	2554
2995910351	Bacteria	Permanent Draft	Genome Sequencing of Type Strains	Cellulomonas humilata ATCC 25174	Indigo Agriculture, MA, USA	2995910351	Actinomycetota	Actinomycetes	Micrococcales	Cellulomonadaceae	Cellulomonas	Cellulomonas humilata	Yes	Yes	Environmental	Terrestrial	Unclassified	Soil	Unclassified		Soil	4650270	4437
2731957747	Bacteria	Permanent Draft	Nocardia genome sequencing - National Institute of Technology and Evaluation, Japan	Nocardia pseudovaccinii NBRC 100343	National Institute of Technology and Evaluation	2731957747	Actinomycetota	Actinomycetes	Mycobacteriales	Nocardiaceae	Nocardia	Nocardia pseudovaccinii	Yes	Yes	Environmental	Terrestrial	Unclassified	Soil	Unclassified		Soil	9922202	9461
2862194119	Bacteria	Finished	Bacterial genomes in TP area, China Genome sequencing	Streptomyces sp. Z022	Institute of Microbiology, Chinese Academy of Sciences	2862194119	Actinomycetota	Actinomycetes	Kitasatosporales	Streptomycetaceae	Streptomyces	Streptomyces dangxiongensis	Yes	Yes	Environmental	Terrestrial	Garden	Soil	Unclassified	China: Dangxiong		8157885	7428
2866505292	Bacteria	Permanent Draft	Rhodococcus Genome sequencing	Prescottella agglutinans CCTCC AB2014297	Shanghai Jiao Tong University	2866505292	Actinomycetota	Actinomycetes	Mycobacteriales	Nocardiaceae	Prescottella	Prescottella agglutinans	Yes	Yes	Environmental	Terrestrial	Unclassified	Soil	Unclassified	Viet Nam: Halong Bay		5425108	5100
8047108308	Bacteria	Permanent Draft	Streptomyces flavotricini NGL1 genome sequencing	Streptomyces flavotricini NGL1	Chandigarh University	8047108308	Actinomycetota	Actinomycetes	Kitasatosporales	Streptomycetaceae	Streptomyces	Streptomyces flavotricini	Yes	Yes	Environmental	Terrestrial	Unclassified	Soil	Unclassified		Soil	8859749	8227
2987317256	Bacteria	Permanent Draft	Myxococcus sp. QH3KD-4-1 genome sequencing	Myxococcus sp. QH3KD-4-1	Guangdong Institute of Microbiology	2987317256	Myxococcota	Myxococcia	Myxococcales	Myxococcaceae	Myxococcus	Myxococcus qinghaiensis	Yes	Yes	Environmental	Terrestrial	Forest	Soil	Unclassified	China: Guangdong Province	Forest soil	11517428	9359
2808606917	Bacteria	Permanent Draft	Burkholderia Genome sequencing - Northern Arizona University	Burkholderia ubonensis MSMB1627WGS	Northern Arizona University	2808606917	Pseudomonadota	Betaproteobacteria	Burkholderiales	Burkholderiaceae	Burkholderia	Burkholderia ubonensis	Yes	Yes	Environmental	Terrestrial	Unclassified	Soil	Unclassified	Australia: Tanami East, Northern Territory		7763548	7067
8046040413	Bacteria	Permanent Draft	Sphingomonas alba SE158 genome sequencing	Sphingomonas alba SE158	Hankyong National University	8046040413	Pseudomonadota	Alphaproteobacteria	Sphingomonadales	Sphingomonadaceae	Sphingomonas	Sphingomonas alba	Yes	Yes	Environmental	Terrestrial	Unclassified	Soil	Unclassified	South Korea: Seoul		2507338	2652
2890151595	Bacteria	Permanent Draft	Bacteria Genome sequencing	Methylocapsa sp. S129	Institute of Microbiology of the AS CR	2890151595	Pseudomonadota	Alphaproteobacteria	Hyphomicrobiales	Beijerinckiaceae	Methylocapsa	Methylocapsa sp. S129	Yes	Yes	Environmental	Terrestrial	Unclassified	Soil	Unclassified	Czech Republic		6873913	6573
2681813543	Bacteria	Permanent Draft	Pseudomonas sp. SWI36	Pseudomonas sp. SWI36	University of Delaware	2681813543	Pseudomonadota	Gammaproteobacteria	Pseudomonadales	Pseudomonadaceae	Pseudomonas	unclassified	Yes	Yes	Environmental	Terrestrial	Loam	Soil	Grasslands	Bowling Green, OH		6172256	5659
2911017280	Bacteria	Permanent Draft	Cohnella Genome sequencing	Cohnella nanjingensis DSM 28246	USDA/ARS/NCAUR	2911017280	Bacillota	Bacilli	Bacillales	Paenibacillaceae	Cohnella	Cohnella nanjingensis	Yes	Yes	Environmental	Terrestrial	Unclassified	Soil	Unclassified	China: Nanjing		7611037	6993
2957120797	Bacteria	Permanent Draft	Large-scale bioinformatics analysis of Bacillus genomes	Priestia megaterium AFS072301	University of North Carolina, Chapel Hill	2957120797	Bacillota	Bacilli	Bacillales	Bacillaceae	Priestia	Priestia megaterium	Yes	Yes	Environmental	Terrestrial	Unclassified	Soil	Unclassified	USA: New York		5862733	6452
8038830921	Bacteria	Permanent Draft	Burkholderia Genome sequencing - Northern Arizona University	Burkholderia cepacia MSMB0859	Northern Arizona University	8038830921	Pseudomonadota	Betaproteobacteria	Burkholderiales	Burkholderiaceae	Burkholderia	Burkholderia cepacia	Yes	Yes	Environmental	Terrestrial	Unclassified	Soil	Unclassified	Australia: Tanami East, Northern Territory		8144615	7527
2886410390	Bacteria	Permanent Draft	Pyxidicoccus caerfyrddinensis CA032A genome sequencing	Pyxidicoccus caerfyrddinensis CA032A	Aberystwyth University	2886410390	Myxococcota	Myxococcia	Myxococcales	Myxococcaceae	Pyxidicoccus	Pyxidicoccus caerfyrddinensis	Yes	Yes	Environmental	Terrestrial	Unclassified	Soil	Unclassified	United Kingdom: Wales, Carmarthen		13434823	10567
2980500886	Bacteria	Finished	Bacillus velezensis sx01604 Genome sequencing	Bacillus velezensis sx01604	Beijing Academy of Agriculture and Forestry Sciences	2980500886	Bacillota	Bacilli	Bacillales	Bacillaceae	Bacillus	Bacillus velezensis	Yes	Yes	Environmental	Terrestrial	Unclassified	Soil	Unclassified	China: Beijing		3926520	3992
2881618687	Bacteria	Permanent Draft	Sequencing of Burkholderia species from Puerto Rico	Burkholderia sp. Bp8992	Northern Arizona University	2881618687	Pseudomonadota	Betaproteobacteria	Burkholderiales	Burkholderiaceae	Burkholderia	Burkholderia sp. Bp8992	Yes	Yes	Environmental	Terrestrial	Unclassified	Soil	Unclassified	Puerto Rico: LAS PIEDRAS		8090042	7554
2847015374	Bacteria	Finished	Genome sequencing of Raoultella ornithinolytica 18	Raoultella ornithinolytica 18	Nanjing Agricultural University	2847015374	Pseudomonadota	Gammaproteobacteria	Enterobacterales	Enterobacteriaceae	Raoultella	Raoultella ornithinolytica	Yes	Yes	Environmental	Terrestrial	Unclassified	Soil	Unclassified	China: Nanjing		5692821	5493
2523231047	Bacteria	Permanent Draft	Gordonia soli NBRC 108243	Gordonia soli NBRC 108243	National Institute of Technology and Evaluation	2523231047	Actinomycetota	Actinomycetes	Mycobacteriales	Gordoniaceae	Gordonia	Gordonia soli	Yes	Yes	Environmental	Terrestrial	Unclassified	Soil	Unclassified	Taichung	Soil	5375815	4955
2887415345	Bacteria	Permanent Draft	Pseudoflavitalea sp. G-6-1-2 genome sequencing	Pseudoflavitalea sp. G-6-1-2	Kyonggi University	2887415345	Bacteroidota	Chitinophagia	Chitinophagales	Chitinophagaceae	Pseudoflavitalea	Pseudoflavitalea sp. G-6-1-2	Yes	Yes	Environmental	Terrestrial	Unclassified	Soil	Unclassified	South Korea: Suwon		6115899	5108
3007494343	Bacteria	Permanent Draft	Analysis of the biochemical properties, biological activity and biotechnological potential of siderophores and biosurfactants produced by Antarctic psychrotolerant bacteria	Pseudomonas sp. ANT_J12	University of Warsaw	3007494343	Pseudomonadota	Gammaproteobacteria	Pseudomonadales	Pseudomonadaceae	Pseudomonas	Pseudomonas sp. ANT_J12	Yes	Yes	Environmental	Terrestrial	Unclassified	Soil	Oil-contaminated	Antarctica: King George Island, Jardine Peak		7184263	6789
2731957632	Bacteria	Permanent Draft	Novosphingobium genome sequencing - National Institute of Technology and Evaluation, Japan	Novosphingobium naphthalenivorans NBRC 102051	National Institute of Technology and Evaluation	2731957632	Pseudomonadota	Alphaproteobacteria	Sphingomonadales	Sphingomonadaceae	Novosphingobium	Novosphingobium naphthalenivorans	Yes	Yes	Environmental	Terrestrial	Unclassified	Soil	Contaminated	Japan	Soil	5218086	5066
8038500538	Bacteria	Permanent Draft	Burkholderia Genome sequencing - Northern Arizona University	Burkholderia territorii MSMB1843WGS	Northern Arizona University	8038500538	Pseudomonadota	Betaproteobacteria	Burkholderiales	Burkholderiaceae	Burkholderia	Burkholderia territorii	Yes	Yes	Environmental	Terrestrial	Unclassified	Soil	Unclassified	Australia: Tanami East, Northern Territory		7048740	6523
2839682702	Bacteria	Permanent Draft	Blastopirellula cremea HEX-2 MGV genome sequencing	Bremerella cremea HEX-2 MGV	University of Sao Paulo	2839682702	Planctomycetota	Planctomycetia	Pirellulales	Pirellulaceae	Bremerella	Bremerella cremea	Yes	Yes	Environmental	Terrestrial	Garden	Soil	Unclassified	Brazil: Sao Paulo		6638894	5561
2880224358	Bacteria	Finished	Study of Pseudomonas strains producing phenazine compounds	Pseudomonas chlororaphis piscium ChPhzS135	Universite de Moncton	2880224358	Pseudomonadota	Gammaproteobacteria	Pseudomonadales	Pseudomonadaceae	Pseudomonas	Pseudomonas chlororaphis	Yes	Yes	Environmental	Terrestrial	Garden	Soil	Unclassified	France: Provence-Alpes-Cote dAzur, Chateaurenard		6940016	6312
2775507176	Bacteria	Permanent Draft	Large-scale bioinformatics analysis of Bacillus genomes	Bacillus sp. AFS029533	University of North Carolina, Chapel Hill	2775507176	Bacillota	Bacilli	Bacillales	Bacillaceae	Bacillus	Bacillus sp. AFS029533	Yes	Yes	Environmental	Terrestrial	Unclassified	Soil	Unclassified	USA: Iowa		5009821	4842
2856263631	Bacteria	Permanent Draft	Nontuberculous mycobacteria isolated from soil in a swine farm in Japan	Mycolicibacterium sp. GF69	Gifu University	2856263631	Actinomycetota	Actinomycetes	Mycobacteriales	Mycobacteriaceae	Mycolicibacterium	Mycolicibacterium sp. GF69	Yes	Yes	Environmental	Terrestrial	Garden	Soil	Unclassified	Japan: Gifu		5329052	5266
2901612924	Bacteria	Permanent Draft	Pandoraea terrae LMG 30175 genome sequencing	Pandoraea terrae LMG 30175	Ghent University	2901612924	Pseudomonadota	Betaproteobacteria	Burkholderiales	Burkholderiaceae	Pandoraea	Pandoraea terrae	Yes	Yes	Environmental	Terrestrial	Unclassified	Soil	Unclassified			6176823	5788
2891214406	Bacteria	Permanent Draft	Bacteria Genome sequencing	Granulicella sp. S190	Institute of Microbiology of the AS CR	2891214406	Acidobacteriota	Terriglobia	Terriglobales	Acidobacteriaceae	Granulicella	Granulicella sp. S190	Yes	Yes	Environmental	Terrestrial	Unclassified	Soil	Unclassified	Czech Republic		5054312	4383
2881037948	Bacteria	Permanent Draft	Afifella aestuarii JA968 genome sequencing	Afifella aestuarii JA968	Jawaharlal Nehru Technological University Hyderabad (JNTUH)	2881037948	Pseudomonadota	Alphaproteobacteria	Hyphomicrobiales	Afifellaceae	Afifella	Afifella aestuarii	Yes	Yes	Environmental	Terrestrial	Unclassified	Soil	Unclassified	India: Yogeshwar Krishna, Gujarat		3918627	3754
8003086639	Bacteria	Permanent Draft	Hymenobacter defluvii BT507 genome sequencing	Hymenobacter defluvii BT507	Seoul Womens University	8003086639	Bacteroidota	Cytophagia	Cytophagales	Hymenobacteraceae	Hymenobacter	Hymenobacter defluvii	Yes	Yes	Environmental	Terrestrial	Unclassified	Soil	Unclassified	South Korea		5424454	4838
2645727922	Bacteria	Permanent Draft	Massilia sp. WF1	Massilia sp. WF1	Zhejiang University	2645727922	Pseudomonadota	Betaproteobacteria	Burkholderiales	Oxalobacteraceae	Massilia	Massilia sp. WF1	Yes	Yes	Environmental	Terrestrial	Unclassified	Soil	Unclassified	Xuzhou, Jiangsu, China		6066684	5462
8069640059	Bacteria	Permanent Draft	Microbacterium lacus SDZm4	Microbacterium lacus SDZm4	Fachhochschule Nordwestschweiz	8069640059	Actinomycetota	Actinomycetes	Micrococcales	Microbacteriaceae	Microbacterium	Microbacterium lacus	Yes	Yes	Environmental	Terrestrial	Unclassified	Soil	Unclassified	Germany: Juelich		3487693	3475
2816332279	Bacteria	Permanent Draft	Burkholderia Genome sequencing - Northern Arizona University	Burkholderia vietnamiensis FL-7-4-10-S1-D0	Northern Arizona University	2816332279	Pseudomonadota	Betaproteobacteria	Burkholderiales	Burkholderiaceae	Burkholderia	Burkholderia vietnamiensis	Yes	Yes	Environmental	Terrestrial	Unclassified	Soil	Unclassified	USA: Florida		6510267	5813
2718218202	Bacteria	Finished	Ketogulonicigenium vulgare SPU B805 Genome sequencing	Ketogulonicigenium vulgare SPU B805	Shenyang Pharmaceutical University	2718218202	Pseudomonadota	Alphaproteobacteria	Rhodobacterales	Roseobacteraceae	Ketogulonicigenium	Ketogulonicigenium vulgare	Yes	Yes	Environmental	Terrestrial	Unclassified	Soil	Unclassified	China: Yunnan		3032608	3012
2795385504	Bacteria	Permanent Draft	Genome sequencing of Streptomyces type strains - USDA	Streptomyces sp. NRRL B-24572	USDA/ARS/NCAUR	2795385504	Actinomycetota	Actinomycetes	Kitasatosporales	Streptomycetaceae	Streptomyces	Streptomyces sp. NRRL B-24572	Yes	Yes	Environmental	Terrestrial	Unclassified	Soil	Unclassified	Unknown		8235495	8187
8004734948	Bacteria	Permanent Draft	Mesorhizobia in Australia	Mesorhizobium sp. B2-3-7	Curtin University	8004734948	Pseudomonadota	Alphaproteobacteria	Hyphomicrobiales	Phyllobacteriaceae	Mesorhizobium	Mesorhizobium sp. B2-3-7	Yes	Yes	Environmental	Terrestrial	Unclassified	Soil	Unclassified	Australia: WA, Badgingarra		5764790	5703
8054814800	Bacteria	Permanent Draft	Streptomyces marispadix M600PL45_2 genome sequencing	Streptomyces marispadix M600PL45_2	University of Porto	8054814800	Actinomycetota	Actinomycetes	Kitasatosporales	Streptomycetaceae	Streptomyces	Streptomyces marispadix	Yes	Yes	Environmental	Terrestrial	Unclassified	Soil	Unclassified	Portugal: Porto		6695159	5690
8002860693	Bacteria	Permanent Draft	Whole genome sequencing and assembly of denitrifying soil isolates	Duganella sp. sic0402	University of Chicago	8002860693	Pseudomonadota	Betaproteobacteria	Burkholderiales	Oxalobacteraceae	Duganella	Duganella sp. sic0402	Yes	Yes	Environmental	Terrestrial	Unclassified	Soil	Unclassified	USA		6120741	5538
3005548003	Bacteria	Permanent Draft	Genome sequencing of free-living Bradyrhizobium	Bradyrhizobium diazoefficiens SZCCT0138	The Chinese University of Hong Kong	3005548003	Pseudomonadota	Alphaproteobacteria	Hyphomicrobiales	Nitrobacteraceae	Bradyrhizobium	Bradyrhizobium diazoefficiens	Yes	Yes	Environmental	Terrestrial	Unclassified	Soil	Unclassified	China: Heihe, Heilongjiang		7132833	6824
3003267012	Bacteria	Permanent Draft	Halophilic and halotolerant type strains	Brevibacterium yomogidense DSM 24850	INRA - Institut National de la Recherche Agronomique	3003267012	Actinomycetota	Actinomycetes	Micrococcales	Brevibacteriaceae	Brevibacterium	Brevibacterium yomogidense	Yes	Yes	Environmental	Terrestrial	Unclassified	Soil	Unclassified			3708510	3285
2900627977	Bacteria	Permanent Draft	Genome sequencing of Trinickia diaoshuihuensis NEAU-SY24	Trinickia diaoshuihuensis NEAU-SY24	Northeast Agricultural University	2900627977	Pseudomonadota	Betaproteobacteria	Burkholderiales	Burkholderiaceae	Trinickia	Trinickia diaoshuihuensis	Yes	Yes	Environmental	Terrestrial	Unclassified	Soil	Unclassified	China: Heilongjiang		6700907	6115
2585427617	Bacteria	Finished	Bacillus subtilis subtilis JH642 subAG174	Bacillus subtilis subtilis JH642 subAG174	Massachusetts Institute of Technology	2585427617	Bacillota	Bacilli	Bacillales	Bacillaceae	Bacillus	Bacillus subtilis	Yes	Yes	Environmental	Terrestrial	Unclassified	Soil	Unclassified		Soil	4188369	4343
2886203185	Bacteria	Permanent Draft	Sequencing of Burkholderia species from Puerto Rico	Burkholderia sp. Bp9142	Northern Arizona University	2886203185	Pseudomonadota	Betaproteobacteria	Burkholderiales	Burkholderiaceae	Burkholderia	Burkholderia sp. Bp9142	Yes	Yes	Environmental	Terrestrial	Unclassified	Soil	Unclassified	Puerto Rico: Rincon		8102894	7548
2687453494	Bacteria	Finished	Isoptericola dokdonensis DS-3 Genome sequencing	Isoptericola dokdonensis DS-3	Yonsei University	2687453494	Actinomycetota	Actinomycetes	Micrococcales	Promicromonosporaceae	Isoptericola	Isoptericola dokdonensis	Yes	Yes	Environmental	Terrestrial	Garden	Soil	Unclassified	Dokdo in South Korea		3826972	3500
2671180655	Bacteria	Permanent Draft	Bacillus methylotrophicus strain:NBIF-003 Genome sequencing and assembly	Bacillus methylotrophicus NBIF-003	Hubei Academy of Agricultural Sciences	2671180655	Bacillota	Bacilli	Bacillales	Bacillaceae	Bacillus	Bacillus velezensis	Yes	Yes	Environmental	Terrestrial	Unclassified	Soil	Unclassified	China: Qingdao City		3881667	3877
2718218023	Bacteria	Finished	Pseudomonas sp. AS1 Genome sequencing	Pseudomonas frederiksbergensis AS1	Korea University	2718218023	Pseudomonadota	Gammaproteobacteria	Pseudomonadales	Pseudomonadaceae	Pseudomonas	Pseudomonas frederiksbergensis	Yes	Yes	Environmental	Terrestrial	Unclassified	Soil	Contaminated	South Korea: Gwangju, Kyunggi-Do		6208705	5909
3004161187	Bacteria	Permanent Draft	Mesorhizobia in Australia	Mesorhizobium sp. B4-1-3	Curtin University	3004161187	Pseudomonadota	Alphaproteobacteria	Hyphomicrobiales	Phyllobacteriaceae	Mesorhizobium	Mesorhizobium sp. B4-1-3	Yes	Yes	Environmental	Terrestrial	Unclassified	Soil	Unclassified	Australia: WA, Badgingarra		6131327	6109
641736132	Bacteria	Permanent Draft	Sequencing Burkholderia strains - Naval Medical Research Center	Burkholderia thailandensis Bt4	Naval Medical Research Center	641736132	Pseudomonadota	Betaproteobacteria	Burkholderiales	Burkholderiaceae	Burkholderia	Burkholderia thailandensis	Yes	Yes	Environmental	Terrestrial	Unclassified	Soil	Unclassified	Environmental isolate from northern Australia	Soil	6555995	6824
2911878434	Bacteria	Finished	Genome Sequencing of Sphingobium sp. KCTC 72723	Sphingobium sp. KCTC 72723	Ajou University	2911878434	Pseudomonadota	Alphaproteobacteria	Sphingomonadales	Sphingomonadaceae	Sphingobium	Sphingobium sp. KCTC 72723	Yes	Yes	Environmental	Terrestrial	Unclassified	Soil	Unclassified	Antarctica		4429423	4429
2754412406	Bacteria	Permanent Draft	Burkholderia Genome sequencing - Northern Arizona University	Burkholderia stagnalis MSMB2169WGS	Northern Arizona University	2754412406	Pseudomonadota	Betaproteobacteria	Burkholderiales	Burkholderiaceae	Burkholderia	Burkholderia stagnalis	Yes	Yes	Environmental	Terrestrial	Unclassified	Soil	Unclassified	Australia: Tanami East, Northern Territory		7521128	6765
2906348519	Bacteria	Permanent Draft	Mesorhizobia in Australia	Mesorhizobium sp. B2-5-3	Curtin University	2906348519	Pseudomonadota	Alphaproteobacteria	Hyphomicrobiales	Phyllobacteriaceae	Mesorhizobium	Mesorhizobium sp. B2-5-3	Yes	Yes	Environmental	Terrestrial	Unclassified	Soil	Unclassified	Australia: WA, Badgingarra		5821167	5757
2886789145	Bacteria	Permanent Draft	Siccirubricoccus phaeus 1-3 genome sequencing	Siccirubricoccus phaeus 1-3	China Agricultural University	2886789145	Pseudomonadota	Alphaproteobacteria	Rhodospirillales	Acetobacteraceae	Siccirubricoccus	Siccirubricoccus phaeus	Yes	Yes	Environmental	Terrestrial	Unclassified	Soil	Unclassified	China: LiaoHe		6551407	5991
2847298977	Bacteria	Finished	Microbacterium oxydans Genome sequencing	Microbacterium oxydans HG3	CEA Genoscope	2847298977	Actinomycetota	Actinomycetes	Micrococcales	Microbacteriaceae	Microbacterium	Microbacterium oxydans	Yes	Yes	Environmental	Terrestrial	Garden	Soil	Unclassified	French Guiana		3906890	3852
3003639971	Bacteria	Finished	Variovorax sp. RKNM96 genome sequencing	Variovorax sp. RKNM96	Croda Canada Limited	3003639971	Pseudomonadota	Betaproteobacteria	Burkholderiales	Comamonadaceae	Variovorax	Variovorax sp. RKNM96	Yes	Yes	Environmental	Terrestrial	Unclassified	Soil	Unclassified	Canada: Kamloops, Battle Bluffs		7168845	6753
2791354996	Bacteria	Permanent Draft	Pseudothioclava arenosa CAU 1312 genome sequencing	Pseudothioclava arenosa CAU 1312	The Third Institute of Oceanography, Key Laboratory of Marine Biogenetic Resources	2791354996	Pseudomonadota	Alphaproteobacteria	Rhodobacterales	Paracoccaceae	Pseudothioclava	Pseudothioclava arenosa	Yes	Yes	Environmental	Terrestrial	Sand	Soil	Unclassified	South Korea: Incheon		2793629	2780
8067259454	Bacteria	Permanent Draft	Luteimonas panaciterrae Gsoil 068 genome sequencing	Luteimonas panaciterrae Gsoil 068	Beijing Institute of Technology	8067259454	Pseudomonadota	Gammaproteobacteria	Xanthomonadales	Xanthomonadaceae	Luteimonas	Luteimonas panaciterrae	Yes	Yes	Environmental	Terrestrial	Unclassified	Soil	Unclassified	South Korea		4093429	3771
2831701549	Bacteria	Permanent Draft	Siphonobacter sp. BAB-5405 genome sequencing	Siphonobacter sp. BAB-5405	Gujarat State Biotechnology Mission	2831701549	Bacteroidota	Cytophagia	Cytophagales	Cytophagaceae	Siphonobacter	Siphonobacter sp. BAB-5405	Yes	Yes	Environmental	Terrestrial	Unclassified	Soil	Unclassified	India: Kheda, Gujarat		6488482	5773
8038616478	Bacteria	Permanent Draft	Burkholderia Genome sequencing - Northern Arizona University	Burkholderia cepacia INT3-BP107	Northern Arizona University	8038616478	Pseudomonadota	Betaproteobacteria	Burkholderiales	Burkholderiaceae	Burkholderia	Burkholderia cepacia	Yes	Yes	Environmental	Terrestrial	Unclassified	Soil	Unclassified	Thailand: Ubon		8735743	8237
2711768172	Bacteria	Permanent Draft	Genome sequencing of Microbacterium spp. isolated from soil	Microbacterium ketosireducens DSM 12510	Austrian Institute of Technology (AIT)	2711768172	Actinomycetota	Actinomycetes	Micrococcales	Microbacteriaceae	Microbacterium	Microbacterium ketosireducens	Yes	Yes	Environmental	Terrestrial	Unclassified	Soil	Unclassified			3921128	3569
2703719317	Bacteria	Permanent Draft	Clostridium puniceum BL70/20	Clostridium puniceum BL70/20	Goettingen Genomics Laboratory	2703719317	Bacillota	Clostridia	Eubacteriales	Clostridiaceae	Clostridium	Clostridium puniceum	Yes	Yes	Environmental	Terrestrial	Unclassified	Soil	Unclassified	United Kingdom	Soil	6082167	5372
2791355494	Bacteria	Permanent Draft	Bacillus xerothermodurans ATCC 27380 genome sequencing	Paenibacillus xerothermodurans ATCC 27380	Jet Propulsion Laboratory, California Institute of Technology	2791355494	Bacillota	Bacilli	Bacillales	Paenibacillaceae	Paenibacillus	Paenibacillus xerothermodurans	Yes	Yes	Environmental	Terrestrial	Unclassified	Soil	Unclassified	USA		4361187	4267
2866783905	Bacteria	Permanent Draft	Whole-genome analyses of novel actinobacteria	Nonomuraea terrae CH32	Ondokuz Mayis University	2866783905	Actinomycetota	Actinomycetes	Streptosporangiales	Streptosporangiaceae	Nonomuraea	Nonomuraea terrae	Yes	Yes	Environmental	Terrestrial	Unclassified	Soil	Unclassified	Turkey: Malatya		9687995	9929
2898624239	Bacteria	Permanent Draft	Taxonomic study of Actinomadura sp. LMG 30035	Actinomadura formosensis LMG 29178	Ghent University	2898624239	Actinomycetota	Actinomycetes	Streptosporangiales	Thermomonosporaceae	Actinomadura	Actinomadura formosensis	Yes	Yes	Environmental	Terrestrial	Unclassified	Soil	Unclassified			7124672	6895
2754412362	Bacteria	Finished	Burkholderia Genome sequencing - Northern Arizona University	Burkholderia stagnalis MSMB735WGS	Northern Arizona University	2754412362	Pseudomonadota	Betaproteobacteria	Burkholderiales	Burkholderiaceae	Burkholderia	Burkholderia stagnalis	Yes	Yes	Environmental	Terrestrial	Unclassified	Soil	Unclassified	Australia: Tanami East, Northern Territory		7583807	6779
2816332646	Bacteria	Permanent Draft	Picher, OK, Soil Microbes	Methylobacterium sp. EM32	The Sequencing Center (Fort Collins)	2816332646	Pseudomonadota	Alphaproteobacteria	Hyphomicrobiales	Methylobacteriaceae	Methylobacterium	unclassified	Yes	Yes	Environmental	Terrestrial	Unclassified	Soil	Unclassified			7427470	6884
2808606903	Bacteria	Permanent Draft	Burkholderia Genome sequencing - Northern Arizona University	Burkholderia ubonensis MSMB803WGS	Northern Arizona University	2808606903	Pseudomonadota	Betaproteobacteria	Burkholderiales	Burkholderiaceae	Burkholderia	Burkholderia ubonensis	Yes	Yes	Environmental	Terrestrial	Unclassified	Soil	Unclassified	Australia: Tanami East, Northern Territory		7102965	6329
8042767708	Bacteria	Permanent Draft	Large-scale bioinformatics analysis of Bacillus genomes	Bacillus wiedmannii AFS069985	University of North Carolina, Chapel Hill	8042767708	Bacillota	Bacilli	Bacillales	Bacillaceae	Bacillus	Bacillus wiedmannii	Yes	Yes	Environmental	Terrestrial	Unclassified	Soil	Unclassified	USA: New York		5935214	6411
3004138508	Bacteria	Permanent Draft	Genome sequencing and assembly of bacterial isolates	Flavobacterium sp. IB48	Technical University of Denmark	3004138508	Bacteroidota	Flavobacteriia	Flavobacteriales	Flavobacteriaceae	Flavobacterium	Flavobacterium sp. IB48	Yes	Yes	Environmental	Terrestrial	Unclassified	Soil	Unclassified	Denmark: Kongens Lyngby		5603394	4872
3004056985	Bacteria	Finished	Microbacterium oleivorans I46	Microbacterium oleivorans I46	COSMAX BTI	3004056985	Actinomycetota	Actinomycetes	Micrococcales	Microbacteriaceae	Microbacterium	Microbacterium oleivorans	Yes	Yes	Environmental	Terrestrial	Unclassified	Soil	Unclassified	South Korea: Dok-do island		3350353	3234
2895977020	Bacteria	Finished	Massilia sp. TW-1 genome sequencing	Telluria antibiotica TW-1	Kyonggi University	2895977020	Pseudomonadota	Betaproteobacteria	Burkholderiales	Oxalobacteraceae	Telluria	Telluria antibiotica	Yes	Yes	Environmental	Terrestrial	Unclassified	Soil	Unclassified	South Korea		7051197	6220
2811994803	Bacteria	Finished	Sandaracinus amylolyticus DSM 53668	Sandaracinus amylolyticus DSM 53668	Institute of Microbial Technology (IMTECH), Council of Scientific and Industrial Research (CSIR)	2811994803	Myxococcota	unclassified	Polyangiales	Sandaracinaceae	Sandaracinus	Sandaracinus amylolyticus	Yes	Yes	Environmental	Terrestrial	Unclassified	Soil	Unclassified			10327335	8785
2751186014	Bacteria	Permanent Draft	Burkholderia Genome sequencing - Northern Arizona University	Burkholderia sp. RF7-non_BP1	Northern Arizona University	2751186014	Pseudomonadota	Betaproteobacteria	Burkholderiales	Burkholderiaceae	Burkholderia	Burkholderia sp. RF7-non_BP1	Yes	Yes	Environmental	Terrestrial	Unclassified	Soil	Unclassified	Thailand: Ubon, Trakam		7311446	6661
2891456851	Bacteria	Permanent Draft	Microbispora sp. SCL1-1 genome sequencing	Microbispora sp. SCL1-1	King Mongkuts University of Technology Thonburi	2891456851	Actinomycetota	Actinomycetes	Streptosporangiales	Streptosporangiaceae	Microbispora	Microbispora sp. SCL1-1	Yes	Yes	Environmental	Terrestrial	Unclassified	Soil	Unclassified	Thailand		8812224	8373
2843057019	Bacteria	Permanent Draft	Ornithinicoccus soli XNB-1 genome sequencing	Ornithinicoccus soli XNB-1	Nanjing Agricultural University	2843057019	Actinomycetota	Actinomycetes	Micrococcales	Intrasporangiaceae	Ornithinicoccus	Ornithinicoccus soli	Yes	Yes	Environmental	Terrestrial	Unclassified	Soil	Unclassified	China: Taian, Shandong province	Farm, Soil	4556803	4411
8040193688	Bacteria	Permanent Draft	Burkholderia Genome sequencing - Northern Arizona University	Burkholderia stagnalis MSMB1136	Northern Arizona University	8040193688	Pseudomonadota	Betaproteobacteria	Burkholderiales	Burkholderiaceae	Burkholderia	Burkholderia stagnalis	Yes	Yes	Environmental	Terrestrial	Unclassified	Soil	Unclassified	Australia: Tanami East, Northern Territory		7575839	7038
2881089068	Bacteria	Permanent Draft	Flavobacterium sandaracinum LB-D12 genome sequencing	Flavobacterium sandaracinum LB-D12	Kyonggi University	2881089068	Bacteroidota	Flavobacteriia	Flavobacteriales	Flavobacteriaceae	Flavobacterium	Flavobacterium sandaracinum	Yes	Yes	Environmental	Terrestrial	Unclassified	Soil	Unclassified	Svalbard: Jan Mayen		4029235	3760
2724679004	Bacteria	Permanent Draft	Phylogenomic Analysis of Bacteroidetes genomes	Pedobacter ginsenosidimutans KACC 14530	Genome Consortium for Active Teaching (GCAT), Lycoming College	2724679004	Bacteroidota	Sphingobacteriia	Sphingobacteriales	Sphingobacteriaceae	Pedobacter	Pedobacter ginsenosidimutans	Yes	Yes	Environmental	Terrestrial	Unclassified	Soil	Unclassified	South Korea: Pocheon		6516617	5618
2724679183	Bacteria	Permanent Draft	Bacillus spp. Genome sequencing	Bacillus nakamurai NRRL B-41092	USDA/ARS/NCAUR	2724679183	Bacillota	Bacilli	Bacillales	Bacillaceae	Bacillus	Bacillus nakamurai	Yes	Yes	Environmental	Terrestrial	Unclassified	Soil	Unclassified	Argentina: Tierra Del Fuego National Park		3886622	4192
2754412383	Bacteria	Permanent Draft	Burkholderia Genome sequencing - Northern Arizona University	Burkholderia stagnalis MSMB835WGS	Northern Arizona University	2754412383	Pseudomonadota	Betaproteobacteria	Burkholderiales	Burkholderiaceae	Burkholderia	Burkholderia stagnalis	Yes	Yes	Environmental	Terrestrial	Unclassified	Soil	Unclassified	Australia: Tanami East, Northern Territory		7559274	6814
2770939456	Bacteria	Permanent Draft	Pseudomonas sp. SWI6	Pseudomonas sp. SWI6	University of Delaware	2770939456	Pseudomonadota	Gammaproteobacteria	Pseudomonadales	Pseudomonadaceae	Pseudomonas	unclassified	Yes	Yes	Environmental	Terrestrial	Clay	Soil	Agricultural land			5652054	5255
2816332667	Bacteria	Permanent Draft	Picher, OK, Soil Microbes	Methylobacterium sp. EM02	The Sequencing Center (Fort Collins)	2816332667	Pseudomonadota	Alphaproteobacteria	Hyphomicrobiales	Methylobacteriaceae	Methylobacterium	unclassified	Yes	Yes	Environmental	Terrestrial	Unclassified	Soil	Unclassified			5857155	5624
2956948267	Bacteria	Permanent Draft	Siminovitchia acidinfaciens 3-2-2 genome sequencing	Siminovitchia acidinfaciens 3-2-2	Anhui Agricultural University	2956948267	Bacillota	Bacilli	Bacillales	Bacillaceae	Siminovitchia	Siminovitchia acidinfaciens	Yes	Yes	Environmental	Terrestrial	Unclassified	Soil	Unclassified	China: Henan Province, Nanyang City		4311621	4309
8046428490	Bacteria	Permanent Draft	Fundidesulfovibrio soli SG60 genome sequencing	Fundidesulfovibrio soli SG60	Fujian Agriculture and Forestry University	8046428490	Thermodesulfobacteriota	Desulfovibrionia	Desulfovibrionales	Desulfovibrionaceae	Fundidesulfovibrio	Fundidesulfovibrio soli	Yes	Yes	Environmental	Terrestrial	Agricultural land	Soil	Unclassified	China		4001451	3621
8064178547	Bacteria	Permanent Draft	Rummeliibacillus sp. SL167	Rummeliibacillus sp. SL167	Korea Research Institute of Bioscience and Biotechnology	8064178547	Bacillota	Bacilli	Bacillales	Planococcaceae	Rummeliibacillus	Rummeliibacillus sp. SL167	Yes	Yes	Environmental	Terrestrial	Unclassified	Soil	Unclassified	South Korea		4168679	4394
3007645781	Bacteria	Permanent Draft	Genome sequencing of Pseudomonas putida II-2	Pseudomonas putida II-2	Tobacco Research Institute of Chinese Academy of Agricultural Sciences	3007645781	Pseudomonadota	Gammaproteobacteria	Pseudomonadales	Pseudomonadaceae	Pseudomonas	Pseudomonas putida	Yes	Yes	Environmental	Terrestrial	Unclassified	Soil	Unclassified	China:Anhui province		5562289	5230
2562617039	Bacteria	Permanent Draft	Ochrobactrum sp. EGD-AQ16 Genome sequencing	Ochrobactrum sp. EGD-AQ16	National Environmental Engineering Research Institute, India	2562617039	Pseudomonadota	Alphaproteobacteria	Hyphomicrobiales	Brucellaceae	Ochrobactrum	Ochrobactrum sp. EGD-AQ16	Yes	Yes	Environmental	Terrestrial	Unclassified	Soil	Desert	India: GJ		4834336	4785
2887702855	Bacteria	Permanent Draft	Aidingimonas lacisalsi XHU 5135 genome sequencing	Aidingimonas lacisalsi XHU 5135	Institute of Microbiology	2887702855	Pseudomonadota	Gammaproteobacteria	Oceanospirillales	Halomonadaceae	Aidingimonas	Aidingimonas lacisalsi	Yes	Yes	Environmental	Terrestrial	Unclassified	Soil	Unclassified	China: Xinjiang		3953408	3776
2920749221	Bacteria	Permanent Draft	Genome Sequencing of Chitinophaga sp. Ak27	Chitinophaga sp. Ak27	Institute of Microbiology, Chinese Academy of Sciences	2920749221	Bacteroidota	Chitinophagia	Chitinophagales	Chitinophagaceae	Chitinophaga	Chitinophaga sp. Ak27	Yes	Yes	Environmental	Terrestrial	Unclassified	Soil	Unclassified	China: Guangdong Province		7968661	6500
3000436605	Bacteria	Finished	Genome sequences of three Beijerinckiaceae strains isolated from early industrial soft coal slags	Beijerinckiaceae bacterium RH AL1	FRIEDRICH SCHILLER UNIVERSITY JENA	3000436605	Pseudomonadota	Alphaproteobacteria	Hyphomicrobiales	Beijerinckiaceae	unclassified	Beijerinckiaceae bacterium RH AL1	Yes	Yes	Environmental	Terrestrial	Unclassified	Soil	Unclassified			4353888	4401
2965070272	Bacteria	Permanent Draft	Mesorhizobia in Australia	Mesorhizobium sp. B2-4-2	Curtin University	2965070272	Pseudomonadota	Alphaproteobacteria	Hyphomicrobiales	Phyllobacteriaceae	Mesorhizobium	Mesorhizobium sp. B2-4-2	Yes	Yes	Environmental	Terrestrial	Unclassified	Soil	Unclassified	Australia: WA, Badgingarra		5782902	5718
8055555723	Bacteria	Permanent Draft	Limnobacter humi NBRC 111650 genome sequencing	Limnobacter humi NBRC 111650	Zhejiang University	8055555723	Pseudomonadota	Betaproteobacteria	Burkholderiales	Burkholderiaceae	Limnobacter	Limnobacter humi	Yes	Yes	Environmental	Terrestrial	Forest	Soil	Unclassified	South Korea		3235113	3127
8038846686	Bacteria	Permanent Draft	Burkholderia Genome sequencing - Northern Arizona University	Burkholderia cepacia MSMB1228WGS	Northern Arizona University	8038846686	Pseudomonadota	Betaproteobacteria	Burkholderiales	Burkholderiaceae	Burkholderia	Burkholderia cepacia	Yes	Yes	Environmental	Terrestrial	Unclassified	Soil	Unclassified	Australia: Tanami East, Northern Territory		8606444	8058
3001148173	Bacteria	Finished	Gemmata massiliana Soil9 genome sequencing	Gemmata massiliana Soil9	University of Uppsala	3001148173	Planctomycetota	Planctomycetia	Gemmatales	Gemmataceae	Gemmata	Gemmata massiliana	Yes	Yes	Environmental	Terrestrial	Unclassified	Soil	Unclassified			10135216	8827
8068724562	Bacteria	Permanent Draft	Brevibacterium permense VKM Ac-2280	Brevibacterium permense VKM Ac-2280	Third Institute of Oceanography	8068724562	Actinomycetota	Actinomycetes	Micrococcales	Brevibacteriaceae	Brevibacterium	Brevibacterium permense	Yes	Yes	Environmental	Terrestrial	Unclassified	Soil	Unclassified	Russia: Perm region		3702760	3424
2910913374	Bacteria	Permanent Draft	Genome Sequencing of Aminobacter sp. MDW-2	Aminobacter sp. MDW-2	Nanjing Agricultural University	2910913374	Pseudomonadota	Alphaproteobacteria	Hyphomicrobiales	Phyllobacteriaceae	Aminobacter	Aminobacter sp. MDW-2	Yes	Yes	Environmental	Terrestrial	Unclassified	Soil	Unclassified	China		6551483	6622
2839229335	Bacteria	Permanent Draft	Dietzia natronolimnaea S-XJ-1 genome sequencing	Dietzia natronolimnaea S-XJ-1	Tongji University	2839229335	Actinomycetota	Actinomycetes	Mycobacteriales	Dietziaceae	Dietzia	Dietzia natronolimnaea	Yes	Yes	Environmental	Terrestrial	Garden	Soil	Unclassified	China: Xinjiang, Karamay Oilfield		3791351	3696
2938550242	Bacteria	Permanent Draft	Leptospira spp. from tropical soils.	Leptospira perolatii FH1-B-C1	Institut Pasteur Montevideo	2938550242	Spirochaetota	Spirochaetia	Leptospirales	Leptospiraceae	Leptospira	Leptospira perolatii	Yes	Yes	Environmental	Terrestrial	Unclassified	Soil	Unclassified	New Caledonia		3984751	3699
8040103408	Bacteria	Permanent Draft	Burkholderia Genome sequencing - Northern Arizona University	Burkholderia stagnalis MSMB658WGS	Northern Arizona University	8040103408	Pseudomonadota	Betaproteobacteria	Burkholderiales	Burkholderiaceae	Burkholderia	Burkholderia stagnalis	Yes	Yes	Environmental	Terrestrial	Unclassified	Soil	Unclassified	Australia: Tanami East, Northern Territory		7857284	7216
8068706676	Bacteria	Finished	Sphingobacterium prati arapr2	Sphingobacterium prati arapr2	Reims University	8068706676	Bacteroidota	Sphingobacteriia	Sphingobacteriales	Sphingobacteriaceae	Sphingobacterium	Sphingobacterium prati	Yes	Yes	Environmental	Terrestrial	Agricultural land	Soil	Unclassified	France: Reims		6020522	5290
2721755517	Bacteria	Finished	Pseudomonas syringae pv. actinidiae ICMP 20586 Genome sequencing	Pseudomonas syringae pv. actinidiae ICMP 20586	The New Zealand Institute for Plant and Food Research Limited	2721755517	Pseudomonadota	Gammaproteobacteria	Pseudomonadales	Pseudomonadaceae	Pseudomonas	Pseudomonas syringae	Yes	Yes	Environmental	Terrestrial	Unclassified	Soil	Orchard soil	New Zealand: Te Puke		6741119	6360
2938608362	Bacteria	Permanent Draft	Leptospira spp. from tropical soils.	Leptospira wolffii FH2-C-A2	Institut Pasteur Montevideo	2938608362	Spirochaetota	Spirochaetia	Leptospirales	Leptospiraceae	Leptospira	Leptospira wolffii	Yes	Yes	Environmental	Terrestrial	Unclassified	Soil	Unclassified	New Caledonia		4235896	3998
8050242079	Bacteria	Permanent Draft	Burkholderia Genome sequencing - Northern Arizona University	Burkholderia cepacia MSMB1510WGS	Northern Arizona University	8050242079	Pseudomonadota	Betaproteobacteria	Burkholderiales	Burkholderiaceae	Burkholderia	Burkholderia cepacia	Yes	Yes	Environmental	Terrestrial	Unclassified	Soil	Unclassified	Australia: Tanami East, Northern Territory		8303495	7748
2882010045	Bacteria	Permanent Draft	Sporolactobacillus sp. THM7-4 genome sequencing	Sporolactobacillus sp. THM7-4	Chulalongkorn University	2882010045	Bacillota	Bacilli	Bacillales	Sporolactobacillaceae	Sporolactobacillus	Sporolactobacillus sp. THM7-4	Yes	Yes	Environmental	Terrestrial	Unclassified	Soil	Unclassified	Thailand: Pathum Thani		3150575	3108
2884824123	Bacteria	Permanent Draft	Massilia sp. KIM genome sequencing	Massilia sp. KIM	Centre for Microbial Ecology and Genomics, University of Pretoria,	2884824123	Pseudomonadota	Betaproteobacteria	Burkholderiales	Oxalobacteraceae	Massilia	Massilia sp. KIM	Yes	Yes	Environmental	Terrestrial	Unclassified	Soil	Unclassified	South Africa		5734887	5160
2855442136	Bacteria	Permanent Draft	Sphingobium terrigena EO9 genome sequencing	Sphingobium terrigena EO9	Chung-Ang University	2855442136	Pseudomonadota	Alphaproteobacteria	Sphingomonadales	Sphingomonadaceae	Sphingobium	Sphingobium terrigena	Yes	Yes	Environmental	Terrestrial	Unclassified	Soil	Unclassified	South Korea: Yangju		5043023	5037
2898133256	Bacteria	Permanent Draft	Myxococcus eversor AB053B genome sequencing	Myxococcus eversor AB053B	Aberystwyth University	2898133256	Myxococcota	Myxococcia	Myxococcales	Myxococcaceae	Myxococcus	Myxococcus eversor	Yes	Yes	Environmental	Terrestrial	Unclassified	Soil	Unclassified	United Kingdom: Wales, Aberystwyth		11394166	9272
8031795064	Bacteria	Permanent Draft	Sequencing as part of the Soil Listeria project	Listeria immobilis FSL L7-1554	Cornell University	8031795064	Bacillota	Bacilli	Bacillales	Listeriaceae	Listeria	Listeria immobilis	Yes	Yes	Environmental	Terrestrial	Unclassified	Soil	Unclassified	USA: MT		2923001	3022
2814123439	Bacteria	Permanent Draft	Burkholderia Genome sequencing - Northern Arizona University	Burkholderia vietnamiensis FL-7-5-30-S2-D0	Northern Arizona University	2814123439	Pseudomonadota	Betaproteobacteria	Burkholderiales	Burkholderiaceae	Burkholderia	Burkholderia vietnamiensis	Yes	Yes	Environmental	Terrestrial	Unclassified	Soil	Unclassified	USA: Florida		6640488	5924
8065828547	Bacteria	Permanent Draft	Geomonas sp. RG17 genome sequencing	Geomonas sp. RG17	Fujian Academy of Agricultural Sciences	8065828547	Thermodesulfobacteriota	Desulfuromonadia	Geobacterales	Geobacteraceae	Geomonas	Geomonas fuzhouensis	Yes	Yes	Environmental	Terrestrial	Agricultural land	Soil	Unclassified	China		5130833	4618
8049068452	Bacteria	Permanent Draft	Streptomyces spiramyceticus F2R-15 genome sequencing	Streptomyces spiramyceticus F2R-15	Institute of Medicinal Biotechnology, Chinese Academy of Medical Sciences & Peking Union Medical Col	8049068452	Actinomycetota	Actinomycetes	Kitasatosporales	Streptomycetaceae	Streptomyces	Streptomyces spiramyceticus	Yes	Yes	Environmental	Terrestrial	Unclassified	Soil	Unclassified	China: Beijing	Soil	7079233	6558
2740891815	Bacteria	Permanent Draft	Actinopolyspora sp. M5A	Actinopolyspora sp. M5A	University of Birmingham	2740891815	Actinomycetota	Actinomycetes	Actinopolysporales	Actinopolysporaceae	Actinopolyspora	Actinopolyspora sp. M5A	Yes	Yes	Environmental	Terrestrial	Sand	Soil	Desert			4334769	4028
2911240273	Bacteria	Permanent Draft	Myxococcus sp. Genome sequencing	Myxococcus sp. AM009	Aberystwyth University	2911240273	Myxococcota	Myxococcia	Myxococcales	Myxococcaceae	Myxococcus	Myxococcus sp. AM009	Yes	Yes	Environmental	Terrestrial	Unclassified	Soil	Unclassified	United Kingdom: Aberystwyth		8798398	7513
2504756050	Bacteria	Permanent Draft	Streptomyces cattleya ATCC 35852	Streptantibioticus cattleyicolor ATCC 35852		2504756050	Actinomycetota	Actinomycetes	Kitasatosporales	Streptomycetaceae	Streptantibioticus	Streptantibioticus cattleyicolor	Yes	Yes	Environmental	Terrestrial	Unclassified	Soil	Unclassified	NJ, USA	Soil	8083687	7374
8050772463	Bacteria	Permanent Draft	Burkholderia Genome sequencing - Northern Arizona University	Burkholderia ubonensis MSMB2119WGS	Northern Arizona University	8050772463	Pseudomonadota	Betaproteobacteria	Burkholderiales	Burkholderiaceae	Burkholderia	Burkholderia ubonensis	Yes	Yes	Environmental	Terrestrial	Unclassified	Soil	Unclassified	Australia: Tanami East, Northern Territory		7979641	7637
2866257564	Bacteria	Permanent Draft	Genome sequencing of Nocardioides solisilvae Ka25	Nocardioides solisilvae Ka25	Chinese Center for Disease Control and Prevention	2866257564	Actinomycetota	Actinomycetes	Propionibacteriales	Nocardioidaceae	Nocardioides	Nocardioides solisilvae	Yes	Yes	Environmental	Terrestrial	Temperate forest	Soil	Bulk soil	India: Himachal Pradesh		3583817	3513
2886623375	Bacteria	Permanent Draft	Aquibacillus sediminis BH258 genome sequencing	Aquibacillus sediminis BH258	Institute of Microbial Ecology and Resources	2886623375	Bacillota	Bacilli	Bacillales	Bacillaceae	Aquibacillus	Aquibacillus sediminis	Yes	Yes	Environmental	Terrestrial	Unclassified	Soil	Unclassified	South Korea: Chonnam, Shinan, Bigeum Island		4381979	4579
2816332258	Bacteria	Permanent Draft	Burkholderia Genome sequencing - Northern Arizona University	Burkholderia vietnamiensis FL-7-2-10-S2-D0	Northern Arizona University	2816332258	Pseudomonadota	Betaproteobacteria	Burkholderiales	Burkholderiaceae	Burkholderia	Burkholderia vietnamiensis	Yes	Yes	Environmental	Terrestrial	Unclassified	Soil	Unclassified	USA: Florida		6510545	5803
2916678930	Bacteria	Finished	Acinetobacter junii lzh-X15 genome sequencing	Acinetobacter junii lzh-X15	Dezhou University	2916678930	Pseudomonadota	Gammaproteobacteria	Moraxellales	Moraxellaceae	Acinetobacter	Acinetobacter junii	Yes	Yes	Environmental	Terrestrial	Unclassified	Soil	Unclassified	China: taian		3288057	3120
2648501646	Bacteria	Permanent Draft	Genome sequencing of soil and sea water bacteria from France	Arthrobacter sp. ZBG10	University of Malaya	2648501646	Actinomycetota	Actinomycetes	Micrococcales	Micrococcaceae	Arthrobacter	Arthrobacter sp. ZBG10	Yes	Yes	Environmental	Terrestrial	Unclassified	Soil	Unclassified	Zellenberg		4110851	3828
2791355040	Bacteria	Permanent Draft	Genome sequencing of denitrifying bacteria isolated from neutral and low pH soil	Rhodanobacter sp. C01	Norwegian University of Life Sciences	2791355040	Pseudomonadota	Gammaproteobacteria	Xanthomonadales	Rhodanobacteraceae	Rhodanobacter	Rhodanobacter sp. C01	Yes	Yes	Environmental	Terrestrial	Unclassified	Soil	Unclassified	Norway		3980721	3589
2915254074	Bacteria	Permanent Draft	Genome sequencing of novel bacterial species	Pseudoduganella ginsengisoli KCTC 42409	Guangdong Institute of Microbiology	2915254074	Pseudomonadota	Betaproteobacteria	Burkholderiales	Oxalobacteraceae	Pseudoduganella	Pseudoduganella ginsengisoli	Yes	Yes	Environmental	Terrestrial	Unclassified	Soil	Unclassified	South Korea		7031378	6229
2808606929	Bacteria	Permanent Draft	Burkholderia Genome sequencing - Northern Arizona University	Burkholderia ubonensis MSMB2108WGS	Northern Arizona University	2808606929	Pseudomonadota	Betaproteobacteria	Burkholderiales	Burkholderiaceae	Burkholderia	Burkholderia ubonensis	Yes	Yes	Environmental	Terrestrial	Unclassified	Soil	Unclassified	Australia: Tanami East, Northern Territory		6305288	5750
2907420268	Bacteria	Permanent Draft	Leptospira spp. from tropical soils.	Leptospira ellisii ATI7-C-A5	Institut Pasteur Montevideo	2907420268	Spirochaetota	Spirochaetia	Leptospirales	Leptospiraceae	Leptospira	Leptospira ellisii	Yes	Yes	Environmental	Terrestrial	Unclassified	Soil	Unclassified	New Caledonia		4314057	4480
8022735684	Bacteria	Permanent Draft	Bacillus sp. SRB_331 genome sequencing	Bacillus sp. SRB_331	The New Zealand Institute for Plant and Food Research Limited	8022735684	Bacillota	Bacilli	Bacillales	Bacillaceae	Bacillus	Bacillus sp. SRB_331	Yes	Yes	Environmental	Terrestrial	Unclassified	Soil	Unclassified	New Zealand		6087768	6500
2969322162	Bacteria	Permanent Draft	Pseudomonas indica NBRC 103045	Pseudomonas indica NBRC 103045	National Institute of Technology and Evaluation	2969322162	Pseudomonadota	Gammaproteobacteria	Pseudomonadales	Pseudomonadaceae	Pseudomonas	Pseudomonas indica	Yes	Yes	Environmental	Terrestrial	Unclassified	Soil	Oil-contaminated	India, Gujarat	Oil fields, Soil	5787881	5370
2911316793	Bacteria	Permanent Draft	Myxococcus sp. Genome sequencing	Myxococcus sp. AM010	Aberystwyth University	2911316793	Myxococcota	Myxococcia	Myxococcales	Myxococcaceae	Myxococcus	Myxococcus sp. AM010	Yes	Yes	Environmental	Terrestrial	Unclassified	Soil	Unclassified	United Kingdom: Aberystwyth		8934185	7474
8003080643	Bacteria	Permanent Draft	Hymenobacter negativus BT442 genome sequencing	Hymenobacter negativus BT442	Seoul Womens University	8003080643	Bacteroidota	Cytophagia	Cytophagales	Hymenobacteraceae	Hymenobacter	Hymenobacter negativus	Yes	Yes	Environmental	Terrestrial	Unclassified	Soil	Unclassified	South Korea		7101020	5991
8000990312	Bacteria	Permanent Draft	Streptosporangiaceae bacterium NEAU-GS5 genome sequencing	Streptosporangiaceae bacterium NEAU-GS5	Northeast Agricultural University	8000990312	Actinomycetota	Actinomycetes	Streptosporangiales	Streptosporangiaceae	unclassified	Streptosporangiaceae bacterium NEAU-GS5	Yes	Yes	Environmental	Terrestrial	Unclassified	Soil	Unclassified	China: Gulongzhong Scenic Spot, Xiangyang City, Hubei Province		9965261	9272
8006767919	Bacteria	Permanent Draft	Bordetella petrii BMC_SI_3 genome sequencing	Bordetella petrii BMC_SI_3	The University of Burdwan	8006767919	Pseudomonadota	Betaproteobacteria	Burkholderiales	Alcaligenaceae	Bordetella	Bordetella petrii	Yes	Yes	Environmental	Terrestrial	Unclassified	Soil	Unclassified	India: Burdwan Medical College and Hospital, Burdwan, West Bengal		4952907	4731
3000528620	Bacteria	Permanent Draft	Genome sequencing to further insight into bacterial adaptation of environment and study on the phylogeny of them	Naasia sp. SYSU D00057	Sun Yat-Sen University	3000528620	Actinomycetota	Actinomycetes	Micrococcales	Microbacteriaceae	Naasia	Naasia sp. SYSU D00057	Yes	Yes	Environmental	Terrestrial	Desert	Soil	Unclassified	China: Xinjiang		3363985	3263
8074840404	Bacteria	Finished	Azotobacter chroococcum HR1 genome sequencing	Azotobacter chroococcum HR1	Hunan Agricultural University	8074840404	Pseudomonadota	Gammaproteobacteria	Pseudomonadales	Pseudomonadaceae	Azotobacter	Azotobacter chroococcum	Yes	Yes	Environmental	Terrestrial	Unclassified	Soil	Unclassified	China: Shanxi		5075724	4929
8085536813	Bacteria	Finished	Bdellovibrio sp. 22V genome sequencing	Bdellovibrio sp. 22V	National Polytechnic Institute, Mexico	8085536813	Bdellovibrionota	Bdellovibrionia	Bdellovibrionales	Pseudobdellovibrionaceae	Bdellovibrio	Bdellovibrio sp. 22V	Yes	Yes	Environmental	Terrestrial	Unclassified	Soil	Unclassified	Mexico: Reynosa		3601631	3529
2847519888	Bacteria	Finished	Stenotrophomonas maltophilia W18 genome sequencing	Stenotrophomonas maltophilia W18	Beijing Normal University	2847519888	Pseudomonadota	Gammaproteobacteria	Xanthomonadales	Xanthomonadaceae	Stenotrophomonas	Stenotrophomonas maltophilia	Yes	Yes	Environmental	Terrestrial	Garden	Soil	Unclassified	China: Tianjin		4738432	4480
8021599454	Bacteria	Permanent Draft	Klebsiella sp. Z2 Genome sequencing and assembly	Klebsiella sp. Z2	Huazhong Agricultural University	8021599454	Pseudomonadota	Gammaproteobacteria	Enterobacterales	Enterobacteriaceae	Klebsiella	Klebsiella sp. Z2	Yes	Yes	Environmental	Terrestrial	Unclassified	Soil	Unclassified	China: Hubei		5582894	5455
2894703127	Bacteria	Permanent Draft	Genome sequencing of Dyella terrae KACC 12748	Dyella terrae KACC 12748	Sun Yat-Sen University	2894703127	Pseudomonadota	Gammaproteobacteria	Xanthomonadales	Rhodanobacteraceae	Dyella	Dyella terrae	Yes	Yes	Environmental	Terrestrial	Unclassified	Soil	Unclassified	South Korea: Jeju Island		4224523	3788
2888531021	Bacteria	Finished	Flavobacterium sp. KBS0721 genome sequencing	Flavobacterium sp. KBS0721	Indiana University	2888531021	Bacteroidota	Flavobacteriia	Flavobacteriales	Flavobacteriaceae	Flavobacterium	Flavobacterium sp. KBS0721	Yes	Yes	Environmental	Terrestrial	Unclassified	Soil	Unclassified	USA: Hickory Corners, MI		5867608	5105
2997436483	Bacteria	Permanent Draft	Streptomyces morookaense DSM 40503	Streptomyces morookaense DSM 40503	Northwest A&F University	2997436483	Actinomycetota	Actinomycetes	Kitasatosporales	Streptomycetaceae	Streptomyces	Streptomyces morookaense	Yes	Yes	Environmental	Terrestrial	Unclassified	Soil	Unclassified		Soil	7469426	7015
2808606945	Bacteria	Permanent Draft	Burkholderia Genome sequencing - Northern Arizona University	Burkholderia ubonensis MSMB1559WGS	Northern Arizona University	2808606945	Pseudomonadota	Betaproteobacteria	Burkholderiales	Burkholderiaceae	Burkholderia	Burkholderia ubonensis	Yes	Yes	Environmental	Terrestrial	Unclassified	Soil	Unclassified	Australia: Tanami East, Northern Territory		7511173	6769
2906919316	Bacteria	Permanent Draft	Rhodococcus sp. Eu-32 genome sequencing	Rhodococcus sp. Eu-32	National Institute for Biotechnology and Genetic Engineering	2906919316	Actinomycetota	Actinomycetes	Mycobacteriales	Nocardiaceae	Rhodococcus	Rhodococcus sp. Eu-32	Yes	Yes	Environmental	Terrestrial	Unclassified	Soil	Unclassified	Pakistan		5612319	5421
2900552071	Bacteria	Permanent Draft	Whole genome sequences of Micromonospora isolated from hot spring sediment	Micromonospora sp. PPF5-6	King Mongkuts University of Technology Thonburi	2900552071	Actinomycetota	Actinomycetes	Micromonosporales	Micromonosporaceae	Micromonospora	Micromonospora sp. PPF5-6	Yes	Yes	Environmental	Terrestrial	Unclassified	Soil	Unclassified	Thailand: Chiang Rai		5955475	5657
8050723661	Bacteria	Permanent Draft	Genome sequencing of Burkholderia ubonensis strain from Australia	Burkholderia ubonensis MSMB0842	Menzies School of Health Research	8050723661	Pseudomonadota	Betaproteobacteria	Burkholderiales	Burkholderiaceae	Burkholderia	Burkholderia ubonensis	Yes	Yes	Environmental	Terrestrial	Unclassified	Soil	Unclassified	Australia: Northern Territory		7606975	7067
2913837954	Bacteria	Permanent Draft	LEGE strains genome sequencing project	Pleurocapsales cyanobacterium LEGE 10410	Interdisciplinary Centre of Marine and Environmental Research	2913837954	Cyanobacteriota	Cyanophyceae	Pleurocapsales	unclassified	unclassified	Pleurocapsales cyanobacterium LEGE 10410	Yes	Yes	Environmental	Terrestrial	Unclassified	Soil	Unclassified	Portugal: Vila Nova de Mil Fontes		6644688	6714
2861987423	Bacteria	Permanent Draft	Microbacterium halotolerans YIM 70130 genome sequencing	Microbacterium halotolerans YIM 70130	Xinjiang Normal University	2861987423	Actinomycetota	Actinomycetes	Micrococcales	Microbacteriaceae	Microbacterium	Microbacterium halotolerans	Yes	Yes	Environmental	Terrestrial	Unclassified	Soil	Unclassified			3545733	3317
8033965875	Bacteria	Permanent Draft	ISURF NH-INBRE 2018 Genome Sequencing	Bacillus sp. dmp10	Colby Sawyer College	8033965875	Bacillota	Bacilli	Bacillales	Bacillaceae	Bacillus	Bacillus sp. dmp10	Yes	Yes	Environmental	Terrestrial	Unclassified	Soil	Unclassified	USA: New Hampshire, Town of Hanover, park adjacent to Geisel Medical School		5945787	6362
8003099907	Bacteria	Finished	Mucilaginibacter rubeus P1 genome sequencing	Mucilaginibacter rubeus P1	Institute of Environmental Microbiology, China	8003099907	Bacteroidota	Sphingobacteriia	Sphingobacteriales	Sphingobacteriaceae	Mucilaginibacter	Mucilaginibacter rubeus	Yes	Yes	Environmental	Terrestrial	Garden	Soil	Unclassified	China		7632803	6508
8050273638	Bacteria	Permanent Draft	Burkholderia Genome sequencing - Northern Arizona University	Burkholderia cepacia MSMB1383WGS	Northern Arizona University	8050273638	Pseudomonadota	Betaproteobacteria	Burkholderiales	Burkholderiaceae	Burkholderia	Burkholderia cepacia	Yes	Yes	Environmental	Terrestrial	Unclassified	Soil	Unclassified	Australia: Tanami East, Northern Territory		8382856	7834
2602041606	Bacteria	Permanent Draft	Smithella sp. ME-1 Genome sequencing	Smithella sp. ME-1	University of California, San Diego	2602041606	Thermodesulfobacteriota	Syntrophia	Syntrophales	Smithellaceae	Smithella	Smithella sp. ME-1	No	Yes	Environmental	Terrestrial	Unclassified	Soil	Oil-contaminated			2907642	3252
8079661748	Bacteria	Permanent Draft	Actinocorallia sp. API 0066 genome sequencing	Actinocorallia sp. API 0066	National Center for Genetic Engineering and Biotechnology (BIOTEC)	8079661748	Actinomycetota	Actinomycetes	Streptosporangiales	Thermomonosporaceae	Actinocorallia	Actinocorallia sp. API 0066	Yes	Yes	Environmental	Terrestrial	Unclassified	Soil	Unclassified	Thailand		7016135	6520
2826879701	Bacteria	Permanent Draft	Large-scale bioinformatics analysis of Bacillus genomes	Bacillus pseudomycoides AFS049531	University of North Carolina, Chapel Hill	2826879701	Bacillota	Bacilli	Bacillales	Bacillaceae	Bacillus	Bacillus pseudomycoides	Yes	Yes	Environmental	Terrestrial	Unclassified	Soil	Unclassified	USA: Iowa		5603835	6067
2843500985	Bacteria	Permanent Draft	Kocuria sp. WN036 genome sequencing	Kocuria sp. WN036	Chinese Academy of Agricultural Sciences	2843500985	Actinomycetota	Actinomycetes	Micrococcales	Micrococcaceae	Kocuria	Kocuria sp. WN036	Yes	Yes	Environmental	Terrestrial	Garden	Soil	Unclassified	China:Binhai, Tianjin		3886776	3717
2791354755	Bacteria	Finished	Desulfovibrio sp. 86-1 genome sequencing	Desulfovibrio sp. 86-1	CEA Genoscope	2791354755	Thermodesulfobacteriota	Desulfovibrionia	Desulfovibrionales	Desulfovibrionaceae	Desulfovibrio	uncultured Desulfovibrio sp.	Yes	Yes	Environmental	Terrestrial	Unclassified	Soil	Unclassified	France: Paris		3463980	2914
2936259166	Bacteria	Finished	Exiguobacterium alkaliphilum B-3531D	Exiguobacterium alkaliphilum B-3531D	G.K. Skryabin Institute of Biochemistry and Physiology of Microorganisms, Pushchino Scientific Cente	2936259166	Bacillota	Bacilli	Bacillales	unclassified	Exiguobacterium	Exiguobacterium alkaliphilum	Yes	Yes	Environmental	Terrestrial	Unclassified	Soil	Unclassified			3029824	3225
2904005555	Bacteria	Permanent Draft	Rhodococcus spelaei C9-5 genome sequencing	Rhodococcus spelaei C9-5	BioPS Co., Ltd.	2904005555	Actinomycetota	Actinomycetes	Mycobacteriales	Nocardiaceae	Rhodococcus	Rhodococcus spelaei	Yes	Yes	Environmental	Terrestrial	Unclassified	Soil	Unclassified	South Korea: Jeju		4805991	4558
2808606951	Bacteria	Permanent Draft	Burkholderia Genome sequencing - Northern Arizona University	Burkholderia ubonensis MSMB1188WGS	Northern Arizona University	2808606951	Pseudomonadota	Betaproteobacteria	Burkholderiales	Burkholderiaceae	Burkholderia	Burkholderia ubonensis	Yes	Yes	Environmental	Terrestrial	Unclassified	Soil	Unclassified	Australia: Tanami East, Northern Territory		7628518	6989
2882319230	Bacteria	Permanent Draft	Bacillaceae bacterium SAS-127 genome sequencing	Bacillaceae bacterium SAS-127	Bacterial Genomics and Evolution Laboratory, CSIR-Institute of Microbial Technology	2882319230	Bacillota	Bacilli	Bacillales	Bacillaceae	unclassified	Bacillaceae bacterium SAS-127	Yes	Yes	Environmental	Terrestrial	Unclassified	Soil	Unclassified	India: Salim Ali Bird Sanctuary, Goa		3650480	3865
8074991959	Bacteria	Permanent Draft	Riparian wetland methanotrophs	Methylocystis sp. H4A	Netherlands Institute of Ecology (NIOO-KNAW)	8074991959	Pseudomonadota	Alphaproteobacteria	Hyphomicrobiales	Methylocystaceae	Methylocystis	Methylocystis sp. H4A	Yes	Yes	Environmental	Terrestrial	Unclassified	Soil	Unclassified	Netherlands: River Waal		4288666	4459
2884371665	Bacteria	Finished	Spirosoma aureum BT328 genome sequencing	Spirosoma aureum BT328	Seoul Womens University	2884371665	Bacteroidota	Cytophagia	Cytophagales	Cytophagaceae	Spirosoma	Spirosoma aureum	Yes	Yes	Environmental	Terrestrial	Unclassified	Soil	Unclassified	South Korea: Uijeongbu-si		8898242	7441
2744054540	Bacteria	Permanent Draft	Genome sequencing Rhodococcus species - Northumbria University	Rhodococcus sp. AJR001	Northumbria University	2744054540	Actinomycetota	Actinomycetes	Mycobacteriales	Nocardiaceae	Rhodococcus	Rhodococcus sp. AJR001	Yes	Yes	Environmental	Terrestrial	Unclassified	Soil	Unclassified			7249338	6999
2597490195	Bacteria	Permanent Draft	Soil crust bacteria isolates from Moab Desert - Arizona State University	Massilia sp. BSC265	Arizona State University	2597490195	Pseudomonadota	Betaproteobacteria	Burkholderiales	Oxalobacteraceae	Massilia	Massilia sp. BSC265	Yes	Yes	Environmental	Terrestrial	Garden	Soil	Unclassified	USA: Moab, Utah	Soil	5326161	4746
2910237267	Bacteria	Finished	Genome Sequencing of Ruania alkalisoli RN3S43	Ruania alkalisoli RN3S43	Inner Mongolia University	2910237267	Actinomycetota	Actinomycetes	Micrococcales	Ruaniaceae	Ruania	Ruania alkalisoli	Yes	Yes	Environmental	Terrestrial	Unclassified	Soil	Unclassified	China: Inner Mongolia		4448695	4006
8030496540	Bacteria	Finished	Salmonella enterica Genome sequencing	Salmonella enterica enterica sv. Bareilly RSE03	Pennsylvania State University	8030496540	Pseudomonadota	Gammaproteobacteria	Enterobacterales	Enterobacteriaceae	Salmonella	Salmonella enterica	Yes	Yes	Environmental	Terrestrial	Unclassified	Soil	Farm	Rwanda: Rulindo		4682141	4777
2808606906	Bacteria	Permanent Draft	Burkholderia Genome sequencing - Northern Arizona University	Burkholderia ubonensis MSMB788WGS	Northern Arizona University	2808606906	Pseudomonadota	Betaproteobacteria	Burkholderiales	Burkholderiaceae	Burkholderia	Burkholderia ubonensis	Yes	Yes	Environmental	Terrestrial	Unclassified	Soil	Unclassified	Australia: Tanami East, Northern Territory		7376341	6606
3006519562	Bacteria	Permanent Draft	Streptomyces sp. Genome sequencing	Streptomyces sp. CBMA291	Instituto Oswaldo Cruz	3006519562	Actinomycetota	Actinomycetes	Kitasatosporales	Streptomycetaceae	Streptomyces	Streptomyces sp. CBMA291	Yes	Yes	Environmental	Terrestrial	Unclassified	Soil	Unclassified	Brazil: Rio de Janeiro		6915562	6149
2902947076	Bacteria	Permanent Draft	Genome sequencce of marine bacteria isolated during Galathea 3 global expedition	Pseudoalteromonas sp. S2755	Technical University of Denmark	2902947076	Pseudomonadota	Gammaproteobacteria	Alteromonadales	Pseudoalteromonadaceae	Pseudoalteromonas	Pseudoalteromonas sp. S2755	Yes	Yes	Environmental	Terrestrial	Unclassified	Soil	Unclassified	Pacific Ocean: Solomon Sea		5188689	4774
2808606927	Bacteria	Permanent Draft	Burkholderia Genome sequencing - Northern Arizona University	Burkholderia ubonensis MSMB2159WGS	Northern Arizona University	2808606927	Pseudomonadota	Betaproteobacteria	Burkholderiales	Burkholderiaceae	Burkholderia	Burkholderia ubonensis	Yes	Yes	Environmental	Terrestrial	Unclassified	Soil	Unclassified	Australia: Tanami East, Northern Territory		7494538	6747
2811995342	Bacteria	Permanent Draft	Burkholderia Genome sequencing - Northern Arizona University	Burkholderia pseudomultivorans MSMB725WGS	Northern Arizona University	2811995342	Pseudomonadota	Betaproteobacteria	Burkholderiales	Burkholderiaceae	Burkholderia	Burkholderia pseudomultivorans	Yes	Yes	Environmental	Terrestrial	Unclassified	Soil	Unclassified	Australia: Tanami East, Northern Territory		7787607	7006
2989091493	Bacteria	Permanent Draft	Polyangium sp. SDU3-1 genome sequencing	Polyangium fumosum DSM 14668	Shandong University	2989091493	Myxococcota	unclassified	Polyangiales	Polyangiaceae	Polyangium	Polyangium fumosum	Yes	Yes	Environmental	Terrestrial	Unclassified	Soil	Unclassified			12981589	10553
8001454889	Bacteria	Permanent Draft	Siccirubricoccus sp. G192 genome sequencing	Siccirubricoccus sp. G192	Hankyong National University	8001454889	Pseudomonadota	Alphaproteobacteria	Rhodospirillales	Acetobacteraceae	Siccirubricoccus	Siccirubricoccus sp. G192	Yes	Yes	Environmental	Terrestrial	Unclassified	Soil	Unclassified	South Korea: Yeongju		5960070	6035
3003212581	Bacteria	Permanent Draft	Psychrophilic species of the genus Psychrobacter are likely descendants of pathobionts	Psychrobacter urativorans ACAM311	Max Planck Institute for Developmental Biology	3003212581	Pseudomonadota	Gammaproteobacteria	Moraxellales	Moraxellaceae	Psychrobacter	Psychrobacter urativorans	Yes	Yes	Environmental	Terrestrial	Unclassified	Soil	Unclassified			2734405	2421
8002161235	Bacteria	Permanent Draft	Glycomyces sp. NEAU-S30 genome sequencing	Glycomyces sp. NEAU-S30	Northeast Agricultural University	8002161235	Actinomycetota	Actinomycetes	Glycomycetales	Glycomycetaceae	Glycomyces	Glycomyces niveus	Yes	Yes	Environmental	Terrestrial	Unclassified	Soil	Unclassified	China: Shouguang City, Shandong Province		5262351	4866
2887588665	Bacteria	Permanent Draft	Geomonas edaphica Red53 genome sequencing	Geomonas edaphica Red53	The University of Tokyo	2887588665	Thermodesulfobacteriota	Desulfuromonadia	Geobacterales	Geobacteraceae	Geomonas	Geomonas edaphica	Yes	Yes	Environmental	Terrestrial	Unclassified	Soil	Unclassified	Japan: Ibaraki		4758995	4293
2744054626	Bacteria	Permanent Draft	Isoprene degrading Rhodococcus species	Rhodococcus sp. SC4	University of East Anglia	2744054626	Actinomycetota	Actinomycetes	Mycobacteriales	Nocardiaceae	Rhodococcus	Rhodococcus sp. SC4	Yes	Yes	Environmental	Terrestrial	Garden	Soil	Unclassified	United Kingdom: Leamington Spa		10541060	9956
2808606930	Bacteria	Permanent Draft	Burkholderia Genome sequencing - Northern Arizona University	Burkholderia ubonensis MSMB2116WGS	Northern Arizona University	2808606930	Pseudomonadota	Betaproteobacteria	Burkholderiales	Burkholderiaceae	Burkholderia	Burkholderia ubonensis	Yes	Yes	Environmental	Terrestrial	Unclassified	Soil	Unclassified	Australia: Tanami East, Northern Territory		7244682	6521
2636415469	Bacteria	Permanent Draft	Microbacterium mangrovi MUSC 115 Genome sequencing	Microbacterium mangrovi MUSC 115	University of Malaya	2636415469	Actinomycetota	Actinomycetes	Micrococcales	Microbacteriaceae	Microbacterium	Microbacterium mangrovi	Yes	Yes	Environmental	Terrestrial	Mangrove soil	Soil	Unclassified	Tanjung Lumpur, Pahang, Malaysia		4416601	4139
2860649622	Bacteria	Finished	Streptomyces sp. CC0208 genome sequencing	Streptomyces sp. CC0208	Tianjin University of Commerce	2860649622	Actinomycetota	Actinomycetes	Kitasatosporales	Streptomycetaceae	Streptomyces	Streptomyces sp. CC0208	Yes	Yes	Environmental	Terrestrial	Unclassified	Soil	Unclassified	China: Tianjin		9320089	8569
8085838610	Bacteria	Permanent Draft	Streptomyces sp. RPT161 genome sequencing	Streptomyces sp. RPT161	Chulalongkorn University	8085838610	Actinomycetota	Actinomycetes	Kitasatosporales	Streptomycetaceae	Streptomyces	Streptomyces sp. RPT161	Yes	Yes	Environmental	Terrestrial	Unclassified	Soil	Unclassified	Thailand		7686396	7219
2979717769	Bacteria	Permanent Draft	Mesorhizobia in Australia	Mesorhizobium sp. B2-2-2	Curtin University	2979717769	Pseudomonadota	Alphaproteobacteria	Hyphomicrobiales	Phyllobacteriaceae	Mesorhizobium	Mesorhizobium sp. B2-2-2	Yes	Yes	Environmental	Terrestrial	Unclassified	Soil	Unclassified	Australia: WA, Badgingarra		6002772	5933
2899213943	Bacteria	Permanent Draft	Lysinibacillus sp. SYSU K30002 genome sequencing	Lysinibacillus antri SYSU K30002	Sun Yat-Sen University	2899213943	Bacillota	Bacilli	Bacillales	Bacillaceae	Lysinibacillus	Lysinibacillus antri	Yes	Yes	Environmental	Terrestrial	Unclassified	Soil	Unclassified	China		4103755	4184
2600254917	Bacteria	Permanent Draft	Enterobacter cloacae 6kgm	Enterobacter cloacae 6kgm	University of Malaya	2600254917	Pseudomonadota	Gammaproteobacteria	Enterobacterales	Enterobacteriaceae	Enterobacter	Enterobacter cloacae	Yes	Yes	Environmental	Terrestrial	Unclassified	Soil	Unclassified	Selangor, Malaysia		4889096	4691
2837485817	Bacteria	Permanent Draft	Muricauda amoyensis GCL-11 genome sequencing	Muricauda amoyensis GCL-11	Third Institute of Oceanography	2837485817	Bacteroidota	Flavobacteriia	Flavobacteriales	Flavobacteriaceae	Flagellimonas	Allomuricauda amoyensis	Yes	Yes	Environmental	Terrestrial	Sand	Soil	Unclassified	China: Xiamen		4095960	3777
2970574040	Bacteria	Permanent Draft	Mesorhizobia in Australia	Mesorhizobium sp. B2-4-16	Curtin University	2970574040	Pseudomonadota	Alphaproteobacteria	Hyphomicrobiales	Phyllobacteriaceae	Mesorhizobium	Mesorhizobium sp. B2-4-16	Yes	Yes	Environmental	Terrestrial	Unclassified	Soil	Unclassified	Australia: WA, Badgingarra		6302834	6208
2884184397	Bacteria	Permanent Draft	Sporolactobacillus sp. THM7-7 genome sequencing	Sporolactobacillus sp. THM7-7	Chulalongkorn University	2884184397	Bacillota	Bacilli	Bacillales	Sporolactobacillaceae	Sporolactobacillus	Sporolactobacillus sp. THM7-7	Yes	Yes	Environmental	Terrestrial	Unclassified	Soil	Unclassified	Thailand: Pathum Thani		3038344	3004
2902856828	Bacteria	Permanent Draft	Mycobacterium Genome sequencing and assembly	Mycolicibacterium sp. CBMA 213	Instituto Oswaldo Cruz	2902856828	Actinomycetota	Actinomycetes	Mycobacteriales	Mycobacteriaceae	Mycolicibacterium	Mycolicibacterium sp. CBMA 213	Yes	Yes	Environmental	Terrestrial	Unclassified	Soil	Unclassified	Brazil		6634577	6596
2754412386	Bacteria	Permanent Draft	Burkholderia Genome sequencing - Northern Arizona University	Burkholderia territorii MSMB1301WGS	Northern Arizona University	2754412386	Pseudomonadota	Betaproteobacteria	Burkholderiales	Burkholderiaceae	Burkholderia	Burkholderia territorii	Yes	Yes	Environmental	Terrestrial	Unclassified	Soil	Unclassified	Australia: Tanami East, Northern Territory		7254970	6655
2894539699	Bacteria	Permanent Draft	Genome sequencing of Pontibacter diazotrophicus H4X	Pontibacter diazotrophicus H4X	Shandong University	2894539699	Bacteroidota	Cytophagia	Cytophagales	Hymenobacteraceae	Pontibacter	Pontibacter diazotrophicus	Yes	Yes	Environmental	Terrestrial	Sand	Soil	Desert	China: Xinjiang		6396889	5641
2902373652	Bacteria	Permanent Draft	Methylobacterium sp. 6HR-1 genome sequencing	Methylobacterium sp. 6HR-1	Guangdong Institute of Microbiology	2902373652	Pseudomonadota	Alphaproteobacteria	Hyphomicrobiales	Methylobacteriaceae	Methylobacterium	Methylobacterium nonmethylotrophicum	Yes	Yes	Environmental	Terrestrial	Sand	Soil	Unclassified	China: Jiangxi		7831372	7370
2788500589	Bacteria	Finished	Sphingobium sp. SCG-1 genome sequencing	Sphingobium sp. SCG-1	California Institute of Technology	2788500589	Pseudomonadota	Alphaproteobacteria	Sphingomonadales	Sphingomonadaceae	Sphingobium	Sphingobium sp. SCG-1	Yes	Yes	Environmental	Terrestrial	Garden	Soil	Unclassified	USA: Porter Ranch, California		4513383	4243
2900415656	Bacteria	Permanent Draft	Type and Reference strains of multiple species Genome sequencing and assembly	Nocardia speluncae DSM 45078	Bacterial Special Pathogens Branch (CDC)	2900415656	Actinomycetota	Actinomycetes	Mycobacteriales	Nocardiaceae	Nocardia	Nocardia speluncae	Yes	Yes	Environmental	Terrestrial	Unclassified	Soil	Unclassified	South Korea		7408658	6899
2808606524	Bacteria	Finished	PAH-degrading Acidovorax strains	Acidovorax carolinensis P4	University of North Carolina, Chapel Hill	2808606524	Pseudomonadota	Betaproteobacteria	Burkholderiales	Comamonadaceae	Acidovorax	Acidovorax carolinensis	Yes	Yes	Environmental	Terrestrial	Unclassified	Soil	Contaminated	Salisbury, NC, USA		4704737	4493
8054315710	Bacteria	Permanent Draft	Streptomyces guryensis NR30 genome sequencing	Streptomyces guryensis NR30	Chungnam National University	8054315710	Actinomycetota	Actinomycetes	Kitasatosporales	Streptomycetaceae	Streptomyces	Streptomyces guryensis	Yes	Yes	Environmental	Terrestrial	Unclassified	Soil	Unclassified	South Korea: Yangcheon-ri		10492733	9723
2754412368	Bacteria	Permanent Draft	Burkholderia Genome sequencing - Northern Arizona University	Burkholderia sp. MSMB1835	Northern Arizona University	2754412368	Pseudomonadota	Betaproteobacteria	Burkholderiales	Burkholderiaceae	Burkholderia	Burkholderia sp. MSMB1835	Yes	Yes	Environmental	Terrestrial	Unclassified	Soil	Unclassified	Australia: Tanami East, Northern Territory		7153745	6401
8069445356	Bacteria	Permanent Draft	Whole-genome sequencing of Paraburkholderia sartisoli-like isolates	Paraburkholderia sp. LMG 32171 R-69919	Ghent University	8069445356	Pseudomonadota	Betaproteobacteria	Burkholderiales	Burkholderiaceae	Paraburkholderia	Paraburkholderia gardini	Yes	Yes	Environmental	Terrestrial	Unclassified	Soil	Unclassified			5958088	5666
2885894003	Bacteria	Permanent Draft	Population genomics tropical Pseudomonas	Pseudomonas sp. R16(2017)	University of Sao Paulo	2885894003	Pseudomonadota	Gammaproteobacteria	Pseudomonadales	Pseudomonadaceae	Pseudomonas	Pseudomonas sp. R16(2017)	Yes	Yes	Environmental	Terrestrial	Loam	Soil	Agricultural soil	Brazil: Piracicaba, Sao Paulo		6318722	5872
2900588628	Bacteria	Permanent Draft	Klebsiella sp. C31 genome sequencing	Paraburkholderia sp. C35	Monash University Malaysia	2900588628	Pseudomonadota	Betaproteobacteria	Burkholderiales	Burkholderiaceae	Paraburkholderia	Paraburkholderia sp. C35	Yes	Yes	Environmental	Terrestrial	Peat	Soil	Forest	Malaysia: North Selangor		9705730	9107
2860897424	Bacteria	Finished	Genome sequencing and assembly of bacteria from soil samples used in the long-term dormancy experiment	Pseudomonas sp. ATCC 43928	Indiana University	2860897424	Pseudomonadota	Gammaproteobacteria	Pseudomonadales	Pseudomonadaceae	Pseudomonas	Pseudomonas sp. ATCC 43928	Yes	Yes	Environmental	Terrestrial	Unclassified	Soil	Unclassified	USA: Hickory Corners, Michigan		6466929	6002
2731957659	Bacteria	Permanent Draft	Metabacillus fastidiosus NBRC 101226	Metabacillus fastidiosus NBRC 101226	National Institute of Technology and Evaluation	2731957659	Bacillota	Bacilli	Bacillales	Bacillaceae	Metabacillus	Metabacillus fastidiosus	Yes	Yes	Environmental	Terrestrial	Garden	Soil	Unclassified	Netherlands	Soil	4403409	4562
2754412313	Bacteria	Permanent Draft	Burkholderia Genome sequencing - Northern Arizona University	Burkholderia stagnalis MSMB1511WGS	Northern Arizona University	2754412313	Pseudomonadota	Betaproteobacteria	Burkholderiales	Burkholderiaceae	Burkholderia	Burkholderia stagnalis	Yes	Yes	Environmental	Terrestrial	Unclassified	Soil	Unclassified	Australia: Tanami East, Northern Territory		7549368	6820
2833821713	Bacteria	Permanent Draft	Genomes of Corallococcus strains isolated from Aberystwtyh and Carmarthen Areas United Kingdom	Corallococcus sp. CA047B	Aberystwyth University	2833821713	Myxococcota	Myxococcia	Myxococcales	Myxococcaceae	Corallococcus	Corallococcus sp. CA047B	Yes	Yes	Environmental	Terrestrial	Unclassified	Soil	Unclassified	United Kingdom		10335215	8656
2841342099	Bacteria	Finished	Mycolicibacterium neoaurum HGMS2 genome sequencing	Mycolicibacterium neoaurum HGMS2	Hubei University of Technology	2841342099	Actinomycetota	Actinomycetes	Mycobacteriales	Mycobacteriaceae	Mycolicibacterium	Mycolicibacterium neoaurum	Yes	Yes	Environmental	Terrestrial	Unclassified	Soil	Unclassified	China: Yichen, Hubei		5421383	5221
2854862567	Bacteria	Permanent Draft	Neorhizobium tomejilense T11_12 genome sequencing	Neorhizobium tomejilense T11_12	CBGP	2854862567	Pseudomonadota	Alphaproteobacteria	Hyphomicrobiales	Rhizobiaceae	Neorhizobium	Neorhizobium tomejilense	Yes	Yes	Environmental	Terrestrial	Unclassified	Soil	Unclassified	Spain		6516060	6451
8018853802	Bacteria	Permanent Draft	Burkholderia sp. 4812 genome sequencing	Burkholderia sp. 4812	Volgograd Plague Control Research Institute	8018853802	Pseudomonadota	Betaproteobacteria	Burkholderiales	Burkholderiaceae	Burkholderia	Burkholderia sp. 4812	Yes	Yes	Environmental	Terrestrial	Unclassified	Soil	Unclassified	Viet Nam		8248545	7656
2838383513	Bacteria	Finished	Acinetobacter baumannii DS002 genome sequencing	Acinetobacter baumannii DS002	University of Hyderabad	2838383513	Pseudomonadota	Gammaproteobacteria	Moraxellales	Moraxellaceae	Acinetobacter	Acinetobacter baumannii	Yes	Yes	Environmental	Terrestrial	Unclassified	Soil	Unclassified	India: Anantpur, Andhra Pradesh		3628278	4008
2731957590	Bacteria	Permanent Draft	Nocardiopsis trehalosi NBRC 14201	Nocardiopsis trehalosi NBRC 14201	National Institute of Technology and Evaluation	2731957590	Actinomycetota	Actinomycetes	Streptosporangiales	Nocardiopsaceae	Nocardiopsis	Nocardiopsis trehalosi	Yes	Yes	Environmental	Terrestrial	Unclassified	Soil	Unclassified		Soil	6367487	5761
8085627056	Bacteria	Permanent Draft	Nannocystis pusilla Na p29 genome sequencing	Pyxidicoccus sp. MSG2	University of Mississippi	8085627056	Myxococcota	Myxococcia	Myxococcales	Myxococcaceae	Pyxidicoccus	Pyxidicoccus sp. MSG2	Yes	Yes	Environmental	Terrestrial	Unclassified	Soil	Unclassified	USA: Mississippi		13340839	10221
2687453133	Bacteria	Finished	Bacillus cereus genome sequencing - National Institutes for Food and Drug Control	Bacillus cereus CMCC P0021	National Institutes for Food and Drug Control (NIFDC)	2687453133	Bacillota	Bacilli	Bacillales	Bacillaceae	Bacillus	Bacillus cereus	Yes	Yes	Environmental	Terrestrial	Unclassified	Soil	Unclassified			6112892	6140
8056952093	Bacteria	Permanent Draft	Ramlibacter paludis XY19 genome sequencing	Ramlibacter paludis XY19	Hankyong National University	8056952093	Pseudomonadota	Betaproteobacteria	Burkholderiales	Comamonadaceae	Ramlibacter	Ramlibacter paludis	Yes	Yes	Environmental	Terrestrial	Wetlands	Soil	Unclassified	South Korea: Seoul		4993032	4870
2920180002	Bacteria	Permanent Draft	Genome Sequencing of Glaciimonas sp. GS1	Glaciimonas sp. GS1	Food Industry Research and Development Institute	2920180002	Pseudomonadota	Betaproteobacteria	Burkholderiales	Oxalobacteraceae	Glaciimonas	Glaciimonas soli	Yes	Yes	Environmental	Terrestrial	Unclassified	Soil	Unclassified	Taiwan		4266306	4043
2808606824	Bacteria	Permanent Draft	Burkholderia Genome sequencing - Northern Arizona University	Burkholderia ubonensis MSMB1633WGS	Northern Arizona University	2808606824	Pseudomonadota	Betaproteobacteria	Burkholderiales	Burkholderiaceae	Burkholderia	Burkholderia ubonensis	Yes	Yes	Environmental	Terrestrial	Unclassified	Soil	Unclassified	Australia: Tanami East, Northern Territory		7394403	6627
2814123441	Bacteria	Permanent Draft	Burkholderia Genome sequencing - Northern Arizona University	Burkholderia vietnamiensis FL-2-1-10-S1-D0	Northern Arizona University	2814123441	Pseudomonadota	Betaproteobacteria	Burkholderiales	Burkholderiaceae	Burkholderia	Burkholderia vietnamiensis	Yes	Yes	Environmental	Terrestrial	Unclassified	Soil	Unclassified	USA: Brevard, Florida		6709635	6066
2648501792	Bacteria	Permanent Draft	Pseudomonas aeruginosa KIB	Pseudomonas aeruginosa KIB	RSE National Center for Biotechnology, Kazakhstan	2648501792	Pseudomonadota	Gammaproteobacteria	Pseudomonadales	Pseudomonadaceae	Pseudomonas	Pseudomonas aeruginosa	No	Yes	Environmental	Terrestrial	Unclassified	Soil	Oil-contaminated	West Kazakhstan, Kazakhstan		5513721	7185
2834611595	Bacteria	Permanent Draft	Nocardioides immobilis CCTCC AB 2017083 genome sequencing	Nocardioides immobilis CCTCC AB 2017083	Huazhong Agricultural University	2834611595	Actinomycetota	Actinomycetes	Propionibacteriales	Nocardioidaceae	Nocardioides	Nocardioides immobilis	Yes	Yes	Environmental	Terrestrial	Garden	Soil	Unclassified	China		6518718	6536
2791355432	Bacteria	Permanent Draft	Genome sequencing of Streptomyces type strains - USDA	Streptomyces alboverticillatus NRRL B-24281	USDA/ARS/NCAUR	2791355432	Actinomycetota	Actinomycetes	Kitasatosporales	Streptomycetaceae	Streptomyces	Streptomyces alboverticillatus	Yes	Yes	Environmental	Terrestrial	Unclassified	Soil	Unclassified	Japan		6879388	6605
8072544225	Bacteria	Permanent Draft	Paenibacillus alkaliterrae DSM 17040 genome sequencing	Paenibacillus alkaliterrae DSM 17040	Chinese Academy of Tropical Agricultural Sciences	8072544225	Bacillota	Bacilli	Bacillales	Paenibacillaceae	Paenibacillus	Paenibacillus alkaliterrae	Yes	Yes	Environmental	Terrestrial	Unclassified	Soil	Unclassified	Kwangchun	Soil	5647115	5694
8002052082	Bacteria	Permanent Draft	Sulfurospirillum sp. T05 genome sequencing	Sulfurospirillum tamanensis T05	Institute of Bioengineering, Research Center of Biotechnology of RAS	8002052082	Campylobacterota	Epsilonproteobacteria	Campylobacterales	Sulfurospirillaceae	Sulfurospirillum	Sulfurospirillum tamanensis	Yes	Yes	Environmental	Terrestrial	Unclassified	Soil	Unclassified	Russia: Moscow		2456696	2572
8078889071	Bacteria	Permanent Draft	Microbacterium sp. G2-8 genome sequencing	Microbacterium sp. G2-8	Beijing Institute of Technology	8078889071	Actinomycetota	Actinomycetes	Micrococcales	Microbacteriaceae	Microbacterium	Microbacterium sp. G2-8	Yes	Yes	Environmental	Terrestrial	Unclassified	Soil	Unclassified	China		3457863	3233
2724679015	Bacteria	Permanent Draft	Mycobacterium avium hominissuis Genome sequencing	Mycobacterium avium hominissuis MAH-E-149-7	Robert Koch Institute (RKI)	2724679015	Actinomycetota	Actinomycetes	Mycobacteriales	Mycobacteriaceae	Mycobacterium	Mycobacterium avium	Yes	Yes	Environmental	Terrestrial	Unclassified	Soil	Unclassified			4948395	4775
2881085443	Bacteria	Permanent Draft	Flavobacterium caseinilyticum AT-3-2 genome sequencing	Flavobacterium caseinilyticum AT-3-2	Kyonggi University	2881085443	Bacteroidota	Flavobacteriia	Flavobacteriales	Flavobacteriaceae	Flavobacterium	Flavobacterium caseinilyticum	Yes	Yes	Environmental	Terrestrial	Unclassified	Soil	Unclassified	Svalbard: Jan Mayen		3838245	3624
8046637244	Bacteria	Finished	Arthrobacter nicotinovorans ATCC 49919 genome sequencing	Arthrobacter nicotinovorans ATCC 49919	Alexandru Ioan Cuza University of Iasi	8046637244	Actinomycetota	Actinomycetes	Micrococcales	Micrococcaceae	Paenarthrobacter	Paenarthrobacter nicotinovorans	Yes	Yes	Environmental	Terrestrial	Unclassified	Soil	Unclassified			4481325	4251
8001382149	Bacteria	Permanent Draft	Actinobacterial Biodiversity from Indonesian Extremobiosphere	Actinospica durhamensis CSCA 57	Indonesia Endowment Fund for Education (LPDP), Sumbawa University of Technology	8001382149	Actinomycetota	Actinomycetes	Catenulisporales	Actinospicaceae	Actinospica	Actinospica durhamensis	Yes	Yes	Environmental	Terrestrial		Soil				9624076	8924
2995613353	Bacteria	Permanent Draft	Microvirga aerilata 5420S-16 genome sequencing	Microvirga aerilata 5420S-16	Seoul Womens University	2995613353	Pseudomonadota	Alphaproteobacteria	Hyphomicrobiales	Methylobacteriaceae	Microvirga	Microvirga aerilata	Yes	Yes	Environmental	Terrestrial	Unclassified	Soil	Unclassified	South Korea: Suwon		6832235	7222
2997797856	Bacteria	Finished	Bacillus thuringiensis BT62 genome sequencing	Bacillus thuringiensis BT62	ICAR-Sugarcane Breeding Institute	2997797856	Bacillota	Bacilli	Bacillales	Bacillaceae	Bacillus	Bacillus thuringiensis	Yes	Yes	Environmental	Terrestrial	Garden	Soil	Unclassified	India: Erode		6133281	6497
2754412403	Bacteria	Permanent Draft	Burkholderia Genome sequencing - Northern Arizona University	Burkholderia diffusa INT4-BP16	Northern Arizona University	2754412403	Pseudomonadota	Betaproteobacteria	Burkholderiales	Burkholderiaceae	Burkholderia	Burkholderia diffusa	Yes	Yes	Environmental	Terrestrial	Unclassified	Soil	Unclassified	Thailand: Ubon		6803566	6137
8068989373	Bacteria	Permanent Draft	Genome sequencing of Sphingomonas ginsenosidimutans KACC 14949	Sphingobium cupriresistens CCTCC AB 2011146	Guangdong Institute of Microbiology	8068989373	Pseudomonadota	Alphaproteobacteria	Sphingomonadales	Sphingomonadaceae	Sphingobium	Sphingobium cupriresistens	Yes	Yes	Environmental	Terrestrial	Unclassified	Soil	Unclassified	China: Daye City, Hubei		4382818	4555
2602042089	Bacteria	Permanent Draft	Streptomyces noursei ATCC 11455	Streptomyces noursei ATCC 11455 Genome sequencing	Center for Biotechnology (CeBiTec), Bielefeld Univeristy	2602042089	Actinomycetota	Actinomycetes	Kitasatosporales	Streptomycetaceae	Streptomyces	Streptomyces noursei	Yes	Yes	Environmental	Terrestrial	Unclassified	Soil	Unclassified		Soil	9815884	8796
2826669015	Bacteria	Permanent Draft	Large-scale bioinformatics analysis of Bacillus genomes	Bacillus pseudomycoides AFS024178	University of North Carolina, Chapel Hill	2826669015	Bacillota	Bacilli	Bacillales	Bacillaceae	Bacillus	Bacillus pseudomycoides	Yes	Yes	Environmental	Terrestrial	Unclassified	Soil	Unclassified	USA: Iowa		5534852	5964
2509601021	Bacteria	Permanent Draft	Genomes from biological desert crust	Leptolyngbya sp. 2LT21S03	The Hebrew University of Jerusalem	2509601021	Cyanobacteriota	Cyanophyceae	Leptolyngbyales	Leptolyngbyaceae	Leptolyngbya	Leptolyngbya sp. 2LT21S03	Yes	Yes	Environmental	Terrestrial	Unclassified	Soil	Unclassified	Biological soil crust Nizana, Negev, Israel	Desert soil	7799549	8798
8069647393	Bacteria	Finished	Microbacterium binotii Au-Mic3 genome sequencing	Microbacterium binotii Au-Mic3	Fujian Agriculture and Forestry University	8069647393	Actinomycetota	Actinomycetes	Micrococcales	Microbacteriaceae	Microbacterium	Microbacterium binotii	Yes	Yes	Environmental	Terrestrial	Unclassified	Soil	Unclassified	China: Fujian, Longyan		3290652	3230
2855133527	Bacteria	Permanent Draft	Genome sequencing to identify a diverse set of biodegradation genes	Photobacterium salinisoli LAM9072	Chinese Academy of Agricultural Sciences	2855133527	Pseudomonadota	Gammaproteobacteria	Vibrionales	Vibrionaceae	Photobacterium	Photobacterium salinisoli	Yes	Yes	Environmental	Terrestrial	Garden	Soil	Unclassified	China: Shandong Province, Lingxian County		4736655	4533
2888094666	Bacteria	Finished	Methylobacterium sp. CLZ Genome sequencing and assembly	Methylobacterium sp. CLZ	Shihezi Unversity	2888094666	Pseudomonadota	Alphaproteobacteria	Hyphomicrobiales	Methylobacteriaceae	Methylobacterium	Methylobacterium sp. CLZ	Yes	Yes	Environmental	Terrestrial	Unclassified	Soil	Unclassified	China: dezhou		5409250	5147
8038902092	Bacteria	Permanent Draft	Burkholderia Genome sequencing - Northern Arizona University	Burkholderia cepacia MSMB616WGS	Northern Arizona University	8038902092	Pseudomonadota	Betaproteobacteria	Burkholderiales	Burkholderiaceae	Burkholderia	Burkholderia cepacia	Yes	Yes	Environmental	Terrestrial	Unclassified	Soil	Unclassified	Australia: Tanami East, Northern Territory		8786301	8269
2982627381	Bacteria	Permanent Draft	Myxococcus stipitatus CYD-1 genome sequencing	Myxococcus stipitatus CYD-1	Jiangxi Agricultural University	2982627381	Myxococcota	Myxococcia	Myxococcales	Myxococcaceae	Myxococcus	Myxococcus stipitatus	Yes	Yes	Environmental	Terrestrial	Unclassified	Soil	Unclassified	China: Jiangxi	Soil	10122657	8235
2968597927	Bacteria	Permanent Draft	Genome sequencing of Paenibacillus nanensis DSM 22867	Paenibacillus nanensis DSM 22867	IRNAS	2968597927	Bacillota	Bacilli	Bacillales	Paenibacillaceae	Paenibacillus	Paenibacillus nanensis	Yes	Yes	Environmental	Terrestrial	Unclassified	Soil	Unclassified	Thailand		6118890	5577
2541047004	Bacteria	Finished	Bacillus velezensis UCMB5113	Bacillus velezensis UCMB5113	Uppsala University	2541047004	Bacillota	Bacilli	Bacillales	Bacillaceae	Bacillus	Bacillus velezensis	Yes	Yes	Environmental	Terrestrial	Unclassified	Soil	Unclassified	Karpaty mountains, Ukraine	Host, Soil	3889532	3838
2846966018	Bacteria	Finished	Azospirillum sp. TSA2S genome sequencing	Azospirillum sp. TSA2S	Nanjing Tech University	2846966018	Pseudomonadota	Alphaproteobacteria	Rhodospirillales	Azospirillaceae	Azospirillum	Azospirillum sp. TSA2s	Yes	Yes	Environmental	Terrestrial	Paddy field/soil	Soil	Unclassified	Japan		8102478	7547
3001438861	Bacteria	Permanent Draft	Aquamicrobium sp. cd-1 genome sequencing	Aquamicrobium sp. cd-1	Nanyang Technological University	3001438861	Pseudomonadota	Alphaproteobacteria	Hyphomicrobiales	Phyllobacteriaceae	Aquamicrobium	Aquamicrobium zhengzhouense	Yes	Yes	Environmental	Terrestrial	Unclassified	Soil	Unclassified	China: Zhengzhou		4071397	4134
2962246212	Bacteria	Finished	Genome Sequencing of Acinetobacter sp. NEB 394	Acinetobacter sp. NEB 394	New England Biolabs	2962246212	Pseudomonadota	Gammaproteobacteria	Moraxellales	Moraxellaceae	Acinetobacter	Acinetobacter sp. NEB 394	Yes	Yes	Environmental	Terrestrial	Unclassified	Soil	Unclassified	USA: Massachusetts		3842079	4032
2597490156	Bacteria	Finished	Flavobacterium psychrophilum strain:CSF259-93 Genome sequencing	Flavobacterium psychrophilum CSF259-93	Igenbio Inc.	2597490156	Bacteroidota	Flavobacteriia	Flavobacteriales	Flavobacteriaceae	Flavobacterium	Flavobacterium psychrophilum	Yes	Yes	Environmental	Terrestrial	Unclassified	Soil	Farm	USA, Idaho	Soil, Water	2900735	2718
2911160440	Bacteria	Permanent Draft	Genome Sequencing of Microvirga jeongseonensis BT688	Microvirga jeongseonensis BT688	Seoul Womens University	2911160440	Pseudomonadota	Alphaproteobacteria	Hyphomicrobiales	Methylobacteriaceae	Microvirga	Microvirga jeongseonensis	Yes	Yes	Environmental	Terrestrial	Unclassified	Soil	Unclassified	South Korea: Jeongseon-gun		6623199	6841
2784132035	Bacteria	Permanent Draft	Genome sequencing of Pseudomonas veronii VI4T1	Pseudomonas veronii VI4T1	University of Hasselt	2784132035	Pseudomonadota	Gammaproteobacteria	Pseudomonadales	Pseudomonadaceae	Pseudomonas	Pseudomonas veronii	Yes	Yes	Environmental	Terrestrial	Unclassified	Soil	Contaminated	Poland: Bobrka		7129310	7148
3005844846	Bacteria	Permanent Draft	Bacteria Genome sequencing	Burkholderia sp. L27(2015)	Institute of Microbiology of the AS CR	3005844846	Pseudomonadota	Betaproteobacteria	Burkholderiales	Burkholderiaceae	Burkholderia	Burkholderia sp. L27(2015)	Yes	Yes	Environmental	Terrestrial	Unclassified	Soil	Unclassified	Czech Republic		6421002	6008
2751185747	Bacteria	Permanent Draft	Thermodesulfovibrio sp. N1 N1 Genome sequencing	Thermodesulfovibrio sp. N1	Institute of Bioengineering, Research Center of Biotechnology of RAS	2751185747	Nitrospirota	Thermodesulfovibrionia	Thermodesulfovibrionales	Thermodesulfovibrionaceae	Thermodesulfovibrio	Thermodesulfovibrio sp. N1	Yes	Yes	Environmental	Terrestrial	Unclassified	Soil	Unclassified	Russia: Tomsk region, Beliy Yar		1907588	2124
2968529325	Bacteria	Permanent Draft	Sequencing as part of the GlobE Evolution project	Leptospira perdikensis 201702692	INRS - Institute Armand Frappier	2968529325	Spirochaetota	Spirochaetia	Leptospirales	Leptospiraceae	Leptospira	Leptospira perdikensis	Yes	Yes	Environmental	Terrestrial	Unclassified	Soil	Unclassified	Malaysia		4001979	3785
8078371404	Bacteria	Permanent Draft	Hephaestia sp. MAHUQ-44 genome sequencing	Hephaestia sp. MAHUQ-44	Chung-Ang University	8078371404	Pseudomonadota	Alphaproteobacteria	Sphingomonadales	Sphingomonadaceae	Hephaestia	Hephaestia sp. MAHUQ-44	Yes	Yes	Environmental	Terrestrial	Unclassified	Soil	Unclassified	South Korea		3512180	3373
8067189984	Bacteria	Permanent Draft	Corallococcus exiguus Genome sequencing and assembly	Corallococcus exiguus AB039A	Aberystwyth University	8067189984	Myxococcota	Myxococcia	Myxococcales	Myxococcaceae	Corallococcus	Corallococcus exiguus	Yes	Yes	Environmental	Terrestrial	Unclassified	Soil	Unclassified	United Kingdom: Aberystwyth		10537547	8905
2976636220	Bacteria	Permanent Draft	Thermorudis pharmacophila Wkt50.2	Thermorudis pharmacophila Wkt50.2	Harvard University	2976636220	Thermomicrobiota	Thermomicrobia	unclassified	unclassified	Thermorudis	Thermorudis pharmacophila	Yes	Yes	Environmental	Terrestrial	Geothermal field	Soil	Unclassified	New Zealand: Waikite	Geothermal soil	2687933	2534
8065615682	Bacteria	Permanent Draft	Oerskovia turbata JCM 3160 genome sequencing	Oerskovia turbata JCM 3160	Dalian University of Technology	8065615682	Actinomycetota	Actinomycetes	Micrococcales	Cellulomonadaceae	Oerskovia	Oerskovia turbata	Yes	Yes	Environmental	Terrestrial	Unclassified	Soil	Unclassified	China: Panjin		4025089	3644
2765235969	Bacteria	Permanent Draft	Burkholderia Genome sequencing - Northern Arizona University	Burkholderia sp. MSMB2041	Northern Arizona University	2765235969	Pseudomonadota	Betaproteobacteria	Burkholderiales	Burkholderiaceae	Burkholderia	Burkholderia sp. MSMB2041	Yes	Yes	Environmental	Terrestrial	Unclassified	Soil	Unclassified	Australia: Tanami East, Northern Territory		7271374	6387
2700988730	Bacteria	Finished	Whole genome sequencing of Nonomuraea Sp. ATCC55076	Nonomuraea sp. ATCC 55076 First submission	Princeton University	2700988730	Actinomycetota	Actinomycetes	Streptosporangiales	Streptosporangiaceae	Nonomuraea	unclassified	Yes	Yes	Environmental	Terrestrial	Tropical forest	Soil	Bulk soil	the Kistna River in Andhra Pradesh State, India		13047416	12014
2911172825	Bacteria	Permanent Draft	Genome Sequencing of Spirosoma profusum BT702	Spirosoma profusum BT702	Seoul Womens University	2911172825	Bacteroidota	Cytophagia	Cytophagales	Cytophagaceae	Spirosoma	Spirosoma profusum	Yes	Yes	Environmental	Terrestrial	Unclassified	Soil	Unclassified	South Korea: Gangwon-do		8731341	7357
2908805120	Bacteria	Permanent Draft	Rhodococcus sp. 14C212 genome sequencing	Rhodococcus sp. 14C212	Ondokuz Mayis University	2908805120	Actinomycetota	Actinomycetes	Mycobacteriales	Nocardiaceae	Rhodococcus	Rhodococcus sp. 14C212	Yes	Yes	Environmental	Terrestrial	Unclassified	Soil	Unclassified	Turkey: Samsun		6617538	6332
2884187402	Bacteria	Permanent Draft	Sporolactobacillus sp. THM19-2 genome sequencing	Sporolactobacillus sp. THM19-2	Chulalongkorn University	2884187402	Bacillota	Bacilli	Bacillales	Sporolactobacillaceae	Sporolactobacillus	Sporolactobacillus sp. THM19-2	Yes	Yes	Environmental	Terrestrial	Unclassified	Soil	Unclassified	Thailand: Pathum Thani		3010013	3048
3002647492	Bacteria	Permanent Draft	Streptomyces reference genome collection	Actinoplanes nipponensis NBRC 14063	Biological Resource Center, National Institute of Technology and Evaluation (NBRC)	3002647492	Actinomycetota	Actinomycetes	Micromonosporales	Micromonosporaceae	Actinoplanes	Actinoplanes nipponensis	Yes	Yes	Environmental	Terrestrial	Garden	Soil	Unclassified		Soil	8952901	8298
2816332252	Bacteria	Permanent Draft	Burkholderia Genome sequencing - Northern Arizona University	Burkholderia vietnamiensis AZ-3-1-30-S1-D7	Northern Arizona University	2816332252	Pseudomonadota	Betaproteobacteria	Burkholderiales	Burkholderiaceae	Burkholderia	Burkholderia vietnamiensis	Yes	Yes	Environmental	Terrestrial	Unclassified	Soil	Unclassified	USA: Tucson, Pima, Arizona		6589347	5956
8099187393	Bacteria	Permanent Draft	Serratia marcescens SSA1	Serratia marcescens SSA1	University of Lagos	8099187393	Pseudomonadota	Gammaproteobacteria	Enterobacterales	Yersiniaceae	Serratia	Serratia marcescens	Yes	Yes	Environmental	Terrestrial	Unclassified	Soil	Unclassified	Nigeria: Lagos		5051852	4976
2785510711	Bacteria	Permanent Draft	Isolation of phenol-degrading bacteria	Rhodococcus sp. AQ5-07		2785510711	Actinomycetota	Actinomycetes	Mycobacteriales	Nocardiaceae	Rhodococcus	Rhodococcus sp. AQ5-07	Yes	Yes	Environmental	Terrestrial	Unclassified	Soil	Unclassified	King George Island, Antarctica	Soil	6745355	6464
2896364036	Bacteria	Permanent Draft	Ensifer sp. T2_8 genome sequencing	Ensifer sp. MMN_5	CBGP	2896364036	Pseudomonadota	Alphaproteobacteria	Hyphomicrobiales	Rhizobiaceae	Ensifer	Ensifer sp. MMN_5	Yes	Yes	Environmental	Terrestrial	Unclassified	Soil	Unclassified	Spain		6623239	6563
2883409860	Bacteria	Finished	Anabaena sp. YBS01 genome sequencing	Anabaena sp. YBS01	St. Edmunds College	2883409860	Cyanobacteriota	Cyanophyceae	Nostocales	Nostocaceae	Anabaena	Anabaena sp. YBS01	Yes	Yes	Environmental	Terrestrial	Unclassified	Soil	Unclassified	India		7013200	6171
2846933512	Bacteria	Finished	Azospirillum species genome sequencing	Azospirillum sp. TSH58	University of Minnesota	2846933512	Pseudomonadota	Alphaproteobacteria	Rhodospirillales	Azospirillaceae	Azospirillum	Azospirillum sp. TSH58	Yes	Yes	Environmental	Terrestrial	Paddy field/soil	Soil	Unclassified	Japan: Tokyo		7244074	6680
2721755587	Bacteria	Finished	DOEs ENIGMA project related genome	Cupriavidus basilensis 4G11	Lawrence Berkeley National Laboratory	2721755587	Pseudomonadota	Betaproteobacteria	Burkholderiales	Burkholderiaceae	Cupriavidus	Cupriavidus basilensis	Yes	Yes	Environmental	Terrestrial	Unclassified	Soil	Unclassified	USA: Oakridge, Tennessee		8421483	7642
2775507133	Bacteria	Permanent Draft	Streptomyces longwoodensis DSM 41677 genome sequencing and assembly	Streptomyces longwoodensis DSM 41677	Bielefeld University	2775507133	Actinomycetota	Actinomycetes	Kitasatosporales	Streptomycetaceae	Streptomyces	Streptomyces longwoodensis	Yes	Yes	Environmental	Terrestrial	Unclassified	Soil	Unclassified			8340358	7398
2894000191	Bacteria	Permanent Draft	Macellibacteroides sp. HH-ZS genome sequencing	Macellibacteroides sp. HH-ZS	University of Huddersfield	2894000191	Bacteroidota	Bacteroidia	Bacteroidales	Porphyromonadaceae	Macellibacteroides	Macellibacteroides sp. HH-ZS	Yes	Yes	Environmental	Terrestrial	Unclassified	Soil	Unclassified	United Kingdom: Huddersfield		4081840	3470
8056761894	Bacteria	Permanent Draft	Microvirga lenta SM9 genome sequencing	Microvirga lenta SM9	Shandong University	8056761894	Pseudomonadota	Alphaproteobacteria	Hyphomicrobiales	Methylobacteriaceae	Microvirga	Microvirga lenta	Yes	Yes	Environmental	Terrestrial	Desert	Soil	Unclassified	China: Taklimakan desert		4504751	4418
8001686355	Bacteria	Permanent Draft	Gottfriedia endophytica RG28 genome sequencing	Gottfriedia endophytica RG28	Dongguk University	8001686355	Bacillota	Bacilli	Bacillales	Bacillaceae	Gottfriedia	Gottfriedia endophytica	Yes	Yes	Environmental	Terrestrial	Unclassified	Soil	Unclassified	South Korea		4081322	4206
2816332277	Bacteria	Permanent Draft	Burkholderia Genome sequencing - Northern Arizona University	Burkholderia vietnamiensis FL-5-1-10-S1-D0	Northern Arizona University	2816332277	Pseudomonadota	Betaproteobacteria	Burkholderiales	Burkholderiaceae	Burkholderia	Burkholderia vietnamiensis	Yes	Yes	Environmental	Terrestrial	Unclassified	Soil	Unclassified	USA: Florida		6856348	6093
2860167608	Bacteria	Finished	Lysobacter defluvii IMMIB APB-9 Genome sequencing	Streptomyces fradiae NKZ-259	Chinese Academy of Agricultural Sciences	2860167608	Actinomycetota	Actinomycetes	Kitasatosporales	Streptomycetaceae	Streptomyces	Streptomyces fradiae	Yes	Yes	Environmental	Terrestrial	Unclassified	Soil	Unclassified	China: Qinghai		8081458	7202
3006269070	Bacteria	Permanent Draft	Actinacidiphila oryziradicis NEAU-C40 genome sequencing	Actinacidiphila oryziradicis NEAU-C40	college of life science	3006269070	Actinomycetota	Actinomycetes	Kitasatosporales	Streptomycetaceae	Actinacidiphila	Actinacidiphila oryziradicis	Yes	Yes	Environmental	Terrestrial	Unclassified	Soil	Unclassified	China: Harbin		11530635	11853
8070028455	Bacteria	Finished	Novel specices identification from Dokdo-islands	Microbacterium sp. KUDC0406	Nakdonggang National Institute of Biological Resources	8070028455	Actinomycetota	Actinomycetes	Micrococcales	Microbacteriaceae	Microbacterium	Microbacterium sp. KUDC0406	Yes	Yes	Environmental	Terrestrial	Garden	Soil	Unclassified	South Korea: Ulleung province		3611693	3761
2562617041	Bacteria	Permanent Draft	Arthrobacter sp. AK-YN10 Genome sequencing	Arthrobacter sp. AK-YN10	National Environmental Engineering Research Institute, India	2562617041	Actinomycetota	Actinomycetes	Micrococcales	Micrococcaceae	Arthrobacter	Arthrobacter sp. AK-YN10	Yes	Yes	Environmental	Terrestrial	Unclassified	Soil	Agricultural land			4834365	4625
8049089543	Bacteria	Permanent Draft	Streptomyces neyagawaensis JCM 4796 genome sequencing	Streptomyces neyagawaensis JCM 4796	Chulalongkorn university	8049089543	Actinomycetota	Actinomycetes	Kitasatosporales	Streptomycetaceae	Streptomyces	Streptomyces neyagawaensis	Yes	Yes	Environmental	Terrestrial	Garden	Soil	Unclassified		Soil	9979945	8897
2843750665	Bacteria	Finished	Massilia lutea DSM 17473 genome sequencing	Pseudoduganella lutea DSM 17473	University of Tuebingen	2843750665	Pseudomonadota	Betaproteobacteria	Burkholderiales	Oxalobacteraceae	Pseudoduganella	Pseudoduganella lutea	Yes	Yes	Environmental	Terrestrial	Unclassified	Soil	Unclassified	China, Jiangsu province	Soil	7504949	6500
2600254989	Bacteria	Permanent Draft	Micromonospora sp. M42	Micromonospora sp. M42	Broad Institute	2600254989	Actinomycetota	Actinomycetes	Micromonosporales	Micromonosporaceae	Micromonospora	Micromonospora sp. M42	Yes	Yes	Environmental	Terrestrial	Unclassified	Soil	Unclassified		Soil	6612018	6489
2785510732	Bacteria	Permanent Draft	Bacillus marisflavi CK-NBRI-03 Genome sequencing and assembly	Rossellomorea marisflavi CK-NBRI-03		2785510732	Bacillota	Bacilli	Bacillales	Bacillaceae	Rossellomorea	Rossellomorea marisflavi	Yes	Yes	Environmental	Terrestrial	Unclassified	Soil	Agricultural land	India: Badaun, Mid western plain zone, Uttar Pradesh	Agricultural soil	4344818	4550
2822138505	Bacteria	Permanent Draft	Large-scale bioinformatics analysis of Bacillus genomes	Bacillus toyonensis AFS009314	University of North Carolina, Chapel Hill	2822138505	Bacillota	Bacilli	Bacillales	Bacillaceae	Bacillus	Bacillus toyonensis	Yes	Yes	Environmental	Terrestrial	Unclassified	Soil	Unclassified	USA: Iowa		5874577	6146
2822488404	Bacteria	Permanent Draft	Large-scale bioinformatics analysis of Bacillus genomes	Bacillus toyonensis AFS073955	University of North Carolina, Chapel Hill	2822488404	Bacillota	Bacilli	Bacillales	Bacillaceae	Bacillus	Bacillus toyonensis	Yes	Yes	Environmental	Terrestrial	Unclassified	Soil	Unclassified	USA: North Carolina		5401295	6192
8081710273	Bacteria	Permanent Draft	Paraburkholderia sp. MMS20-SJTN17 genome sequencing	Paraburkholderia sp. MMS20-SJTN17	Chungnam National University	8081710273	Pseudomonadota	Betaproteobacteria	Burkholderiales	Burkholderiaceae	Paraburkholderia	Paraburkholderia sp. MMS20-SJTN17	Yes	Yes	Environmental	Terrestrial	Unclassified	Soil	Unclassified	South Korea: Songwon-ri		6526454	6127
2562617037	Bacteria	Permanent Draft	Clostridium sporogenes	Clostridium sporogenes 388, DSM 795	Goettingen Genomics Laboratory	2562617037	Bacillota	Clostridia	Eubacteriales	Clostridiaceae	Clostridium	Clostridium sporogenes	Yes	Yes	Environmental	Terrestrial	Unclassified	Soil	Unclassified		Soil	4106655	3824
2921333427	Bacteria	Permanent Draft	Genome sequencing of Terpene-metabolizing soil isolates	Achromobacter sp. UMC46	University of Minho	2921333427	Pseudomonadota	Betaproteobacteria	Burkholderiales	Alcaligenaceae	Achromobacter	Achromobacter sp. UMC46	Yes	Yes	Environmental	Terrestrial	Unclassified	Soil	Unclassified	Portugal: Cabril		6680704	6246
2834219415	Bacteria	Permanent Draft	Penicillin consuming ABC strain genomes	Pandoraea sp. PE-S2T-3	Washington University in St. Louis	2834219415	Pseudomonadota	Betaproteobacteria	Burkholderiales	Burkholderiaceae	Pandoraea	Pandoraea sp. PE-S2T-3	Yes	Yes	Environmental	Terrestrial	Forest	Soil	Unclassified	USA: Pennsylvania, Toftrees State Gameland Area		6176158	5461
2897137741	Bacteria	Finished	Bacillus subtilis MZK05 genome sequencing	Bacillus subtilis MZK05	Ministry of Education and Ministry of Science and Technology, Government of Bangladesh, University of Dhaka	2897137741	Bacillota	Bacilli	Bacillales	Bacillaceae	Bacillus	Bacillus subtilis	Yes	Yes	Environmental	Terrestrial	Unclassified	Soil	Unclassified	Bangladesh		4145727	4405
[truncated: 4,324 more rows]
