# Supplementary material for: Y-A+S is the new Y-A-S: Updating microbial life history tradeoffs with comparative genomics
Source: Research Square preprint supplement (doi:10.21203/rs.3.rs-6486618/v1), 2025-05-02
Supplement: Supplementary file 5 [file Table_S10.xlsx]

## Sheet: cor_2
	OGT	MGT	Amino-transporter	GH-transporter	Total-transporter	Protein-enzyme	CAZy	pH-Tol	Temp-Tol	Biofilm	Osmolyte
OGT	1	0.326526	-0.218735	-0.101933	-0.212423	-0.374736	-0.266379	-0.487738	-0.252055	-0.110191	-0.195928
MGT	0.326526	1	-0.0144107	-0.124128	0.0404431	0.00349641	-0.05974	-0.0739658	0.0395972	0.173165	0.141055
Amino-transporter	-0.218735	-0.0144107	1	0.560838	0.85094	0.519154	0.119839	0.476272	0.373592	0.217817	0.484897
GH-transporter	-0.101933	-0.124128	0.560838	1	0.658301	0.307924	0.474519	0.199417	0.206393	-0.0719808	0.124411
Total-transporter	-0.212423	0.0404431	0.85094	0.658301	1	0.626691	0.188068	0.630659	0.493005	0.420594	0.676931
Protein-enzyme	-0.374736	0.00349641	0.519154	0.307924	0.626691	1	0.349749	0.696401	0.694265	0.439046	0.58065
CAZy	-0.266379	-0.05974	0.119839	0.474519	0.188068	0.349749	1	0.115101	0.224113	-0.0872826	-0.0395798
pH-Tol	-0.487738	-0.0739658	0.476272	0.199417	0.630659	0.696401	0.115101	1	0.671807	0.530768	0.707138
Temp-Tol	-0.252055	0.0395972	0.373592	0.206393	0.493005	0.694265	0.224113	0.671807	1	0.443477	0.498977
Biofilm	-0.110191	0.173165	0.217817	-0.0719808	0.420594	0.439046	-0.0872826	0.530768	0.443477	1	0.845988
Osmolyte	-0.195928	0.141055	0.484897	0.124411	0.676931	0.58065	-0.0395798	0.707138	0.498977	0.845988	1
