# Supplementary material for: Y-A+S is the new Y-A-S: Updating microbial life history tradeoffs with comparative genomics
Source: Research Square preprint supplement (doi:10.21203/rs.3.rs-6486618/v1), 2025-05-02
Supplement: Supplementary file 9 [file Table_S11.xlsx]

## Sheet: cor_1
	Yield	OGT	MGT	Amino-transporter	GH-transporter	Total-transporter	Protein-enzyme	CAZy	pH-Tol	Temp-Tol	Biofilm	Osmolyte
Yield	1	-0.0301291	0.0247132	-0.177934	-0.169134	-0.18837	-0.0326067	-0.14349	-0.18292	-0.132169	0.0572126	0.0609376
OGT	-0.0301291	1	0.152721	0.0240325	0.0754068	-0.0587357	-0.23849	-0.138007	-0.428398	-0.226891	-0.405901	-0.387491
MGT	0.0247132	0.152721	1	-0.270591	-0.128529	-0.253999	-0.115506	0.100453	-0.111668	0.0635511	-0.0354748	-0.150295
Amino-transporter	-0.177934	0.0240325	-0.270591	1	0.70521	0.899088	0.415162	-0.144338	0.417495	0.108068	-0.00808387	0.378148
GH-transporter	-0.169134	0.0754068	-0.128529	0.70521	1	0.817092	0.367828	0.288564	0.284249	-0.0253081	-0.273212	0.243576
Total-transporter	-0.18837	-0.0587357	-0.253999	0.899088	0.817092	1	0.57066	-0.0249923	0.580779	0.231878	0.100052	0.554531
Protein-enzyme	-0.0326067	-0.23849	-0.115506	0.415162	0.367828	0.57066	1	0.168617	0.604828	0.424198	0.343331	0.556854
CAZy	-0.14349	-0.138007	0.100453	-0.144338	0.288564	-0.0249923	0.168617	1	0.0269291	-0.0870215	-0.0805808	-0.0358217
pH-Tol	-0.18292	-0.428398	-0.111668	0.417495	0.284249	0.580779	0.604828	0.0269291	1	0.648892	0.544645	0.699243
Temp-Tol	-0.132169	-0.226891	0.0635511	0.108068	-0.0253081	0.231878	0.424198	-0.0870215	0.648892	1	0.514514	0.453345
Biofilm	0.0572126	-0.405901	-0.0354748	-0.00808387	-0.273212	0.100052	0.343331	-0.0805808	0.544645	0.514514	1	0.751413
Osmolyte	0.0609376	-0.387491	-0.150295	0.378148	0.243576	0.554531	0.556854	-0.0358217	0.699243	0.453345	0.751413	1
