# Supplementary material for: Y-A+S is the new Y-A-S: Updating microbial life history tradeoffs with comparative genomics
Source: Research Square preprint supplement (doi:10.21203/rs.3.rs-6486618/v1), 2025-05-02
Supplement: Supplementary file 13 [file Table_S12.xlsx]

## Sheet: cor_2
	Yield	OGT	MGT	Amino-transporter	GH-transporter	Total-transporter	Protein-enzyme	CAZy	pH-Tol	Temp-Tol	Biofilm	Osmolyte
Yield	1	0.0282632	-0.055327	-0.102275	-0.14134	-0.0916341	-0.134561	-0.179297	0.0921236	0.101016	0.227512	0.19094
OGT	0.0282632	1	0.0372786	-0.250012	-0.267003	-0.400033	-0.461024	-0.245393	-0.461204	-0.16305	-0.233317	-0.414129
MGT	-0.055327	0.0372786	1	-0.246425	-0.120742	-0.295491	0.0673447	0.244784	-0.299935	-0.0635138	-0.14355	-0.381554
Amino-transporter	-0.102275	-0.250012	-0.246425	1	0.648437	0.90642	0.253205	-0.137212	0.516887	0.246048	0.256205	0.583241
GH-transporter	-0.14134	-0.267003	-0.120742	0.648437	1	0.764415	0.429822	0.423434	0.344376	0.0386445	-0.131058	0.269155
Total-transporter	-0.0916341	-0.400033	-0.295491	0.90642	0.764415	1	0.419576	0.015089	0.682785	0.332615	0.285503	0.686734
Protein-enzyme	-0.134561	-0.461024	0.0673447	0.253205	0.429822	0.419576	1	0.475795	0.490206	0.441573	0.0931889	0.244742
CAZy	-0.179297	-0.245393	0.244784	-0.137212	0.423434	0.015089	0.475795	1	-0.149023	-0.184637	-0.368974	-0.281597
pH-Tol	0.0921236	-0.461204	-0.299935	0.516887	0.344376	0.682785	0.490206	-0.149023	1	0.660027	0.531491	0.803688
Temp-Tol	0.101016	-0.16305	-0.0635138	0.246048	0.0386445	0.332615	0.441573	-0.184637	0.660027	1	0.536429	0.537177
Biofilm	0.227512	-0.233317	-0.14355	0.256205	-0.131058	0.285503	0.0931889	-0.368974	0.531491	0.536429	1	0.790819
Osmolyte	0.19094	-0.414129	-0.381554	0.583241	0.269155	0.686734	0.244742	-0.281597	0.803688	0.537177	0.790819	1
