# Supplementary material for: Y-A+S is the new Y-A-S: Updating microbial life history tradeoffs with comparative genomics
Source: Research Square preprint supplement (doi:10.21203/rs.3.rs-6486618/v1), 2025-05-02
Supplement: Supplementary file 17 [file Table_S17.xlsx]

## Sheet: selected_genes
gene
doxD
tc.pot
tpdA
xpk
cyoA
gltB
mlaA
sucD
crtI
pas
artP2
fliC
pfkA
yrbG
accA
dppA1
rocD
narB
fbpI.sebp
flhB
flgM
perR
betL
pstS
czcC
fevA
lplT
flgL
hflB
ureAB
rpiA
trkA
GH97
oppF1
rpiB
actP
sugA
sppA
natA
adc
eda
dmpA
kgtP
pufL
soxC
ogdh
mdh
ureC
proP
nuoD
folD
E3.4.17.19
acss
mmpL10
trpS
cfa
nirD
fumII
GH23
gadC
thiT
GH16
mleP
sdhD
mepM
pstB
mcl
pspA
gdh2
por
marC
fbpI
czcA
bica
tsdA
fliM
aspC
malQ
ibpA2
gdhA_1
gpmB
epi
opuBD
GH116
pstA
fbpII
rbcS
nuoK
psmA
ptrB
corA
hrcA
galK
hslV
rhaS
GH36
petC
proB
cydB
cyoB
cpxA
GH30
uxuA
motA
aldo.classI.2
ackA
rbsA
lptC
dacB
afuB
iaaA
mlaC
fucI
cbiN
fumalpha
icd
atoD
mfch
soxB
ydjE
oforB
atpC
urtA
gluA
lptE
crtL1
flhA
msbA
sdhA
sbp
hbd
fliQ
wcaK
ecfA2
pgk
proC
pepP
tctB
fliF
sugP2
gluP
tolR
cbiO
rbcL
tagH
dmsA
porB
galT
frdD
amt
cysH
sugS1
adh
modB
abfD
tc.apa
wza
troB
coxA
prlC
rseP
ndhF
oforA
bepA
gltD
aldo.classI.1
rhaT1
mngA
sat
phaG
modF
narG
tet
pcp
bioY
sir
aprA
GH19
cydD
tc.cnt
rhtB
clpB
aceA
lolC_E
sdhB
xapB
tc2.A.86.1.7
iadA
pip
lonH
livK
cwlK
accD
nuoC
tcyA
gltA
baeS
arsB2
glpV
sitD
phnE
lldG
cysA
GH120
nepI
sipW
tauC
degP
aclSlarge
cpaA
aprE2
pslF
zipB
map
nosF
prtC_U32
ykfC
pgi.tal
rocF
yiaM
accC
triC
bpeE
pepN
norB
dnaK
czcD
mazF
tagG
hdrA2
flgE
flgN
psmB
urtC
bcd
atpF
cadA
oppA1
nrfH
oprC
treS1
nuoJ
eno
soxR
lptD
ldcA
ahpC_1
rnr
nuoN
groES
ftrA
petB_2
tupB
bchE
puuP
poxB
gltS1
fadL
ccoN
cydA
nuoB
phbB
fumI
atpG
TC.HAE1
troA
ccmC
fieF
dsrE
oxyR
eamB
eamA
gltJ
oprB
pps
pgl_1
fhuC
flgA
galE
relB
atpvaB
nifK
vpsM
pspC
GH79
gluC
coxC
pgi.pmi
dctA
ssuB
mthK
atoE
uxaC
nasA
GH1
katE
motB
paa
fru1EIIA
grpE
mhpT
glnA
phnD
pepT
hpr
aglG
atoB
scrK
GH113
hyaD
gpmI
GH44
ttdT
aspB
ccmB
cysC
atpA
otsA
fdhA
speF
sdhC
ppdK
GH18
pdaD
mntH
nodI
macB
metF
cpxR
mlaD
pycA
phaZ2
capD
nrtB
lamB
pbpG
napB
alsD
flgH
bchC
groEL
vanY
ohrR
livF
lolD
ampG
erfK
znuA
tolQ
otsB
arnE
btuB
rcnA
mdtC
cspA
sugP
aapJ
fliO
fevP
nhaA
pfk
citE
bccP
entS
gltL
lon
rbsC
prsW
ycbB
aldo.classII
sam
fumbeta
fucA
cysP
ccmD
wcaJ
loiP
msmX
livG
emrY
glpT
iatA2
msmG2
glpF
pepQ
lepB
tc.sulp
lctP2
GH31
celEIIC
acnA
lspA
afuA
glucP
nuoE
emrK
cusA
devB
jgt
tpi
mscS
fliE
manA
GH45
mfs.set
ccoP
manEIIA
frdB
xoxF
gpgP
betB
degQ
tctC
wcaC
oforC
glnH
chiE
ureA
mggS
mxaR
exaA
ssuC
mtlEIIC
nirK
E3.4.21.50
wcaF
eutM
gltI
ribS
opuC
fliD
aprX
yydH
clpA
phoD
arsB1
deaD
apgM
mdtB
msmE2
fadJ
lptB
dacC
zmS
desA
nrtC
ribP
xylH
cysJ
opuA
dasB
pslH
sucC
cyoC
sqr
satP
pap
ldh
urtB
pepF
uxaB
qcrB
oppB1
ptsI
nixA
lldF
lpseA
leuE
livM
pgd
ppc
wcaI
fliA
tri
fecA
GH74
nuoH
crtB
hprA
dasA
adhE
mlaF
tc.fev
bxlG
wcaE
mnhB
flgI
lldE
TC.DME
pilD
bxlF
aldh
cebF
fliH
modA
flgB
phy
pepD_S1
GH12
thiB
ganP
pgl_2
pepE
phbC
hdrB2
efeO
GH4
soeA
yhdR
bpeF
cwlO
dcuB
kup
aclSsmall_1
mer
lpseP
nuoM
pckA2
mdtD
lplB
crtY
pdhD
ngcG
mnhD
ecfT
phoQ
rbsB
fruK
tc.ncs1
aceB
fbpII.sebp
nasB
mntP
katG
oppD1
zmP
gpd
dcp
pepO
mazE
ocd
cch.hbcd
nuoF
ampH
phnC
rhaP
cysI
dnaJ
proA
ureB
inoE
oleC5
mfs.cp
pepA_M17
manEIIC
aapQ
trkH
mlaE
atpE
gtsA
sugS2
fchA
mnhE
rpe
tc.aat
pflD
pct
fpvA
mgtE
flgG
oprO_P
tc.citmhs
zmA
aaeB
ptb
fccB
fiu
adiA
rutG
yiaO
codB
ynfM
fliK
phoA
tc.ncs2
baeR
citA
yjbB
rhaT2
pdc
citF
pgi_arch
GH54
crt
fevS
ibpA1
phnS
atpB
pyk
pyc
galM
graA
glsA
rnfC
macA
pslG
narI_dsrM
ggs
iolF
tc.bat2
devC
GH3
pufC
gapA.NAD.
nukF
yqgE
uhpC
glpQ
GH26
atpD
araJ
crtQ
petF
GH43
tc.nss
GH5
pepD_M20
lptA
crs
frdC
proX
pgi
aapP
pnp
frcB
nuoI
hpt
oxlT
aapM
tkt
GH51
cysNC
alsA
regB
ccoO
glk
mscL
speA
gpmA
GH27
nirA
PHO84
prk
tal
devA
uxaA
hslU
msmF2
pta1
GH9
agxt
oqxB
hcaT
aglF
sodA
ggt
dctP
glpS
flhC
ugpE
chlL
aglE
pslB
nirB
GH8
gtsB
metQ
malY
benE
rhtA
norC
betA
modC
appA
wcaL
porA
tauA
rnfD
glpP
qcrA
mct
tc.dass
malG
dctM
mttB
mtkB
ntrEIIA
prc
cydC
chaA
manEIIB
lysE
GH2
pfpI
dppA
lplA
chlE
rnfE
hdrC2
fliN
mxaD
nhaC
tctA
TC.GNTP
artR
afuC
flgK
relE
devS
cebE
pckA1
GH6
ampS
bchH
phsC
ccmA
flgF
atpvaC
proW
ahpC_2
tc.livcs
merC
merT
mtlEIIA
natD1
proV
atpvaE
flgC
regA
uxuB
efeB
crtC
pslJ
porG
ganQ
flgD
pfkB
buk
sugP1
clpP
chrA
oforD
acsB
glyA
wtpA
hps.phi
gldA
cbiQ
acsC
fwdB
nuoA
ugpB
dsrB
pstC
cpg
araQ
hxt
znuB
adhP
nodJ
fbpIII
ganO
gatEIIA
araN
nhaB
porD
fdh.NADP.B
phsA
atpvaA
fwdE
ugpA
ndhE
pqqL
wtpC
cdhA
mepA
mnhG
dsrD
fba_3
ftfL
rnfB
tc.sss
tc.gph
kpsE
fliG
lptG
putP
gfrEIIA
maeN
fdhC
ssuA
cysN
clpX
desR
nisP
rhaQ
sseA
fccA
livH
GH20
hycI
trpA
mnhC
rnfA
atpvaF
vanX
vexF
nuoL
tc.agcs
cysW
tupC
GH10
nqrD
preP
xylF
echE
acsE
GH39
eryE
cooS
phoP
exbD
pbuG
lptF
frcA
pbp4b
natB
nuoBCD
wtpB
nqrA
nuoG
oppC1
dmsB
mmr
tupA
gltP
mut
ulaEIIA
atpH
oleC4
mtlF
tehA
eutN
ansP
nuoCD
asrB
arcD
soeC
gguA
meh
nagEIIB
ulaEIIB
pelD
celEIIB
nagEIIC
gatEIIB
pta2
bioM
kdgT
gntT
mdtO
amiS
mntB1
eryG
ahpF
betT
mnP
gguP
gfrEIIC
cysD
pslA
gadAB
yopJ
dak
lhpM
GH62
prs
coxB
lctP1
E3.4.11.24
butB
clpC
fliI
aguG
pepX
cfrA
ccmL
petH
tet35
glc1EIIC
nagEIIA
soxD
mtlG
ulaEIIC
iatP1
yadH
GH134
dlst
sspA
dasC
abgT
pelE
nrtD
bxlE
phaD
nirC
cycA
phnU
araE
dcuC
troC
cydCD
cpeT
wcaM
sohB
hxlA
fhuD
bchF
gdhA_2
acr.hydt
zmpA
E3.4.24.33
nosZ
pslL
cbiK
nikA
