# Supplementary material for: Y-A+S is the new Y-A-S: Updating microbial life history tradeoffs with comparative genomics
Source: Research Square preprint supplement (doi:10.21203/rs.3.rs-6486618/v1), 2025-05-02
Supplement: Supplementary file 21 [file Table_S2.xlsx]

## Sheet: microtrait_GH
microtrait_hmm-name	microtrait_hmm-description
GH1	glycoside hydrolase CAZy family 1
GH10	glycoside hydrolase CAZy family 10
GH11	glycoside hydrolase CAZy family 11
GH110	glycoside hydrolase CAZy family 110
GH113	glycoside hydrolase CAZy family 113
GH116	glycoside hydrolase CAZy family 116
GH12	glycoside hydrolase CAZy family 12
GH120	glycoside hydrolase CAZy family 120
GH124	glycoside hydrolase CAZy family 124
GH134	glycoside hydrolase CAZy family 134
GH16	glycoside hydrolase CAZy family 16
GH18	glycoside hydrolase CAZy family 18
GH19	glycoside hydrolase CAZy family 19
GH2	glycoside hydrolase CAZy family 2
GH20	glycoside hydrolase CAZy family 20
GH23	glycoside hydrolase CAZy family 23
GH26	glycoside hydrolase CAZy family 26
GH27	glycoside hydrolase CAZy family 27
GH3	glycoside hydrolase CAZy family 3
GH30	glycoside hydrolase CAZy family 30
GH31	glycoside hydrolase CAZy family 31
GH36	glycoside hydrolase CAZy family 36
GH39	glycoside hydrolase CAZy family 39
GH4	glycoside hydrolase CAZy family 4
GH43	glycoside hydrolase CAZy family 43
GH44	glycoside hydrolase CAZy family 44
GH45	glycoside hydrolase CAZy family 45
GH48	glycoside hydrolase CAZy family 48
GH5	glycoside hydrolase CAZy family 5
GH51	glycoside hydrolase CAZy family 51
GH52	glycoside hydrolase CAZy family 52
GH54	glycoside hydrolase CAZy family 54
GH6	glycoside hydrolase CAZy family 6
GH62	glycoside hydrolase CAZy family 62
GH7	glycoside hydrolase CAZy family 7
GH74	glycoside hydrolase CAZy family 74
GH79	glycoside hydrolase CAZy family 79
GH8	glycoside hydrolase CAZy family 8
GH9	glycoside hydrolase CAZy family 9
GH97	glycoside hydrolase CAZy family 97
GH98	glycoside hydrolase CAZy family 98
