# Supplementary material for: Y-A+S is the new Y-A-S: Updating microbial life history tradeoffs with comparative genomics
Source: Research Square preprint supplement (doi:10.21203/rs.3.rs-6486618/v1), 2025-05-02
Supplement: Supplementary file 25 [file Table_S20.xlsx]

## Sheet: MAG_gen_trait.5
guild	genome.size	amino.transport	pH	temp	biofilm	osmolyte	GH.trasnport	tranport.total	Protein	CAZy	ogt	mgr
1161	3590440	2	8	11	5	8	3	34	18	8	31.6442	5.3479
1163	5228666	8.4	11	9.8	2	10.2	26.8	76.8	24	10.4	34.369	5.66059
1343	5342043	11	8	8	1	12	25	91	26	16	33.6958	6.00476
351	1.90901e+06	6.83333	3.66667	7.66667	0.833333	4.66667	16.8333	57	16.1667	7.16667	35.0779	6.2048
967	2.92393e+06	3	4.33333	8	5.66667	9.66667	3	46	17.3333	3.33333	36.6479	6.32795
1213	947041	0	1	4.54545	0.363636	1.27273	0	3.45455	9.90909	6	33.6954	6.42903
690	1.79604e+06	5	3.2	6	0.5	5	10.2	36.4	13.2	3.8	36.8998	6.47937
1330	688517	0.5	2	3.5	0.5	3.5	6	14.5	8.5	2	55.4958	6.59227
737	1.83597e+06	1	2.33333	7.33333	5	6	3.66667	18.3333	11.3333	0	40.5073	6.73201
1335	2.6818e+06	3.75	6.75	9.5	6.25	11.5	3.25	39.5	21	5.75	34.5426	6.96428
300	3.18491e+06	10	3.5	5.5	3	8	23	78	27.5	10.5	31.9137	6.99757
936	3.40768e+06	1.83333	3.83333	8.16667	4.66667	5.5	1.83333	29.1667	22.8333	6.66667	32.2685	7.08344
1017	2.42087e+06	4.71429	6.38095	8.57143	1.04762	7.19048	9.04762	39.6667	22.4762	2.85714	39.5389	7.12081
1158	1.72636e+06	5	2	4.6	1.4	5.4	5.2	40.2	14	4	41.4033	7.31474
589	2.43741e+06	2.53846	5.53846	8.46154	0.615385	2.38462	4.76923	26.3846	13.8462	6.76923	36.0861	7.34415
1238	1.9788e+06	1.85714	7.57143	9	7	11.7143	2	34.1429	17.8571	5.57143	33.9073	7.40253
998	6493391	7	9.33333	11	6	11	4.83333	58.5	29.6667	11	35.8824	7.42579
974	2.45774e+06	2.71429	3.85714	6.14286	0.857143	6.57143	5.14286	35.2857	17.7143	4.14286	42.0322	7.48704
1093	4.62111e+06	6.8125	8.25	6.75	1.5	7.375	8.125	48	24.8125	12.8125	30.7744	7.50199
620	1.35467e+06	0.666667	3	5.77778	0.222222	3.55556	1.44444	11.7778	12.5556	1.33333	39.9595	7.54311
1200	980121	0	0.777778	4.83333	0	1.05556	0	4.5	11.5556	2.44444	32.9479	7.56781
1076	3.33901e+06	4.14286	6.5	9.78571	6.35714	9.14286	6.35714	45.5714	22.2857	5.85714	30.8867	7.57527
758	682094	0	1	2	0	0	0	0	2.5	0	40.8357	7.58568
1069	5.26803e+06	7	13	9.11111	2	13	9	72	25.7778	9	34.8499	7.61692
791	4.79283e+06	6.4	6.4	8.8	4	10.6	22.4	59	20	19	37.0925	7.68522
1206	721763	0	0.935484	5.87097	0	0	0	3.90323	9.25806	3.16129	33.8816	7.77046
1156	1.39373e+06	3.54545	2.09091	6	0.727273	4.18182	6.90909	35.7273	8.54545	2.54545	40.4543	7.81531
823	2.49147e+06	3.26667	6.6	8.66667	0.333333	5.4	7.13333	31.8667	17.8667	9.2	32.5841	7.83796
1199	569927	0	1	2.71429	0	0.0714286	0	2.28571	9.35714	1.07143	34.5044	7.86729
1143	2.90302e+06	6.1	6.7	7.5	1	6.5	13.6	50.6	19.1	9.1	36.6783	7.91925
599	821290	1.5	2.5	5.5	1	1.5	1	5.5	10	0.5	33.8284	7.95338
1105	2.72072e+06	5.33333	7.66667	7.73333	6.33333	13.2667	5.6	66.7333	23.0667	9.66667	40.5865	7.9559
890	2.81602e+06	3.625	6.9375	7.5	0.875	5.4375	10.5	37.9375	16.5625	9.5625	36.9053	7.99769
797	2.31684e+06	2.9	8.7	8.9	6.45	12.75	5.9	41.95	20.95	7.6	26.6813	8.02009
1087	5.10526e+06	5.25	8.35	9.15	3.95	7.55	12.6	50.1	26.95	14.8	31.803	8.0296
889	2.49774e+06	3.76923	5.61538	8.69231	0.538462	4.38462	3.88462	33.0769	15.5	8.03846	34.5652	8.04452
358	716284	0	0.0714286	4.21429	0.857143	1.14286	0	2.78571	9.42857	2	34.6101	8.08899
891	2.3536e+06	5.45455	3.40909	7.36364	0.318182	5.86364	8.09091	42.3636	20.2273	2.36364	41.6982	8.12445
1168	3.42715e+06	6.625	6.625	7.75	7.625	17.375	23.75	81.125	21	6.125	28.94	8.21253
455	2.9071e+06	3.54545	8.72727	9.81818	8.09091	12.9091	1.09091	30.2727	28.0909	4.81818	30.2624	8.23628
838	565470	0	1	5	0	0.692308	0	2.38462	9.69231	3.38462	50.7296	8.27032
1077	1386586	3.28571	3.14286	6.42857	0.285714	4	1.85714	27	12	2.42857	40.3955	8.30456
1306	1.63573e+06	5	2.41667	7.25	0	3.08333	7.33333	37.8333	17	5.41667	42.2718	8.30914
1011	4.52742e+06	3	8.2	9.1	4.4	9.2	1.7	40.4	27.2	5.7	36.023	8.31047
871	1.25722e+06	0	0.6	5	0.4	1.4	0.2	7	11.8	6.8	39.6972	8.31725
388	3.22011e+06	3.12195	5.53659	7.63415	3.56098	6.39024	4.34146	31.6098	20.8049	17.4634	37.4814	8.40326
1032	3.94563e+06	3	10.3571	9.07143	9.07143	16.2143	6.5	56.5	26	7.57143	32.9219	8.4689
862	3.22817e+06	2.94737	5.78947	8.68421	2.26316	6.21053	9.52632	37.4737	27.9474	12.6842	39.0062	8.49094
1260	1.72615e+06	4.36364	5.54545	6.45455	5.18182	10.4545	2.72727	44.9091	19.2727	1.81818	42.1769	8.5158
1075	3.09297e+06	2.75	4.75	7.875	4.375	5.25	4.25	33.875	22.5	4.625	32.0897	8.52725
337	3.66136e+06	2.1	6.6	10.1	4.35	6.45	12.75	36.3	25.95	20.25	27.7962	8.57874
545	1.15162e+06	4.6	0.6	3.8	0.8	2.4	6.8	26.6	9	5.8	39.0908	8.65231
736	1962720	0.666667	3	6.77778	0.777778	5.55556	5.22222	30.1111	14.2222	5	33.1517	8.66274
1110	4.07931e+06	7	9.45455	8	3.45455	11.7273	10.4545	67.6364	22	6.27273	35.8809	8.7263
767	1805455	1.66667	3	6.16667	4	6.5	5.5	28.3333	11.5	3.66667	45.0551	8.79774
792	3.23404e+06	3.46154	8.84615	10.0769	7.34615	13.7308	7.26923	37.1538	21.7308	8.23077	25.6406	8.82834
617	3.56086e+06	4.35714	6.5	9.35714	3	8.42857	3	35.1429	24.2857	15.8571	37.2736	8.83189
830	4.07934e+06	3.66667	8.5	9.11111	4.11111	8.72222	5.05556	36.1667	24.8889	10.1111	35.6469	8.8657
1127	2.41558e+06	5.08	4.58	7.92	2.68	6.26	7.66	39.92	21	4.8	41.6239	8.91736
1142	2.32435e+06	2.9	4.2	6.3	2.3	3.8	1.6	24.9	19.1	13.4	35.6875	8.91834
772	3.89522e+06	6.7	7.4	9.9	3.6	8.2	22.4	71.8	22.4	12.4	34.0423	8.9257
1125	6.02273e+06	3.88889	8.33333	10.2222	6.11111	10	9.55556	53.7778	30.2222	15.8889	30.7314	8.95953
1304	3.72469e+06	6.83333	4.77778	8.5	5	7.72222	21	82.5	20.7222	14.2778	38.2779	8.97789
591	1.93142e+06	1.78261	3.73913	6.13043	4.82609	8.30435	3.82609	20.087	10.5652	11.087	39.4282	8.99466
536	3.81254e+06	4.28	5.4	8.36	3.16	7.96	5.72	34.88	23.76	17.32	35.8212	9.00688
1027	3.06497e+06	3.11111	6.44444	7.22222	0	4.88889	6	28.3333	22	3.66667	41.3747	9.03834
1094	5.84099e+06	7.92105	13.4474	10.4474	8.26316	18.6842	14.0789	89.2368	30.9474	6.76316	32.4218	9.08395
1274	1.79977e+06	5.28571	2.5	5.78571	0.571429	4.14286	8.5	37.2143	16.5714	3.28571	38.7466	9.12189
345	3.01466e+06	4.25	7.97917	8.04167	7.72917	13.3958	3.85417	44.125	21.7917	9.10417	30.4308	9.16881
1090	3.05335e+06	4	7.76923	7.92308	1	5.84615	8.30769	41.6154	23.1538	9.30769	35.4561	9.18017
1138	2.25674e+06	3.625	6.125	7.125	6.8125	14	3.25	39	15.875	7.9375	32.1583	9.19237
986	4401090	7.75	12.5	9.5	8.75	21.5	21.25	105	28.5	8	32.7395	9.19722
511	5.29645e+06	5.61111	8.44444	6.66667	0.388889	8	11.8333	53.1667	21	10.1667	32.4898	9.20475
701	4.81403e+06	3.16667	5.66667	6.5	2.33333	6.16667	5.66667	41	20.3333	7	31.7005	9.21797
812	1.68093e+06	1.42857	5.14286	7.42857	0.428571	2.57143	3.28571	18.1429	11.4286	4.28571	37.894	9.23937
578	1.89431e+06	2.6	3.7	5.7	2.7	5.3	5.9	27.5	12.2	6	40.2121	9.28984
344	898208	0	1.5	4.64286	0.214286	1.71429	0	5.35714	10.0714	3.28571	37.6698	9.30808
613	1.84146e+06	5	5.41667	7.83333	5.25	6.58333	0.666667	22.6667	18.5833	2.25	29.0078	9.31503
156	3.78874e+06	2.78571	11.3571	9.5	6.57143	14.8571	4.71429	44.2857	23.5714	6.28571	29.6954	9.38444
1241	3.32028e+06	5.8	6.7	8.7	3	8.9	12.1	53.4	20.6	6.9	40.6756	9.42977
287	3.70061e+06	8.15385	9.23077	9	1.46154	8.84615	7.30769	63.2308	25.5385	4.53846	32.8063	9.43081
487	2.91268e+06	3.7931	6.37931	7.51724	5.51724	9.24138	1.93103	41.3103	18.931	3.37931	38.6358	9.43139
290	1.95196e+06	4.07692	4.92308	8.53846	1.38462	4.07692	1.61538	31.6154	15.7692	3.92308	37.8412	9.46558
921	8.83243e+06	6.77778	12	9	0.777778	5.88889	22.7778	78.5556	26.1111	16.6667	28.1725	9.52017
805	690371	0	0.909091	3.45455	1.81818	1.81818	0	1.81818	9.36364	2.54545	44.2031	9.53495
1113	2.50786e+06	3.44444	4.22222	6.66667	4.44444	9	5.22222	29.2222	20.7778	7.44444	33.3025	9.55554
524	3.09414e+06	5.94444	6.27778	6.94444	0.611111	7.91667	16.5556	50.1111	19.4167	9.83333	37.5202	9.55936
1226	3.74618e+06	9.66667	14.4167	10.6667	8	15.0833	7.08333	80.9167	23.4167	4	28.4531	9.58675
1116	1.89565e+06	1.5	5.66667	6	0.5	4.66667	0	27.5	13.8333	5.16667	38.822	9.60467
750	1.88573e+06	3.36667	4.36667	7.6	4.96667	8.63333	3.63333	40.3333	16.9	2.53333	41.273	9.61111
771	2.38836e+06	3	5.125	8.25	4.625	7.875	6.5	42.75	11.25	12.125	29.8092	9.69703
1072	4.80973e+06	3.2	8.35	9.7	5.4	11.25	3.9	33.4	30.45	9.05	36.6958	9.70134
1092	3946866	4.23077	5.84615	5.46154	0.923077	7.23077	14.0769	54	23.2308	12.6923	32.575	9.72619
1286	4.53036e+06	4.0625	4.75	7.9375	4.125	8.5625	7.9375	37.5625	22	15.875	48.8205	9.76639
1056	5.91403e+06	5	11.2308	10.1538	4.69231	10.1538	8.84615	54.3846	28.3846	8.30769	32.9562	9.82093
1115	2.27751e+06	4.4	7	9	3.6	6.2	1.8	23	16.8	9.4	35.0432	9.89219
814	2.8624e+06	3.20588	3.79412	8.41176	2.64706	5.79412	6.35294	37.9118	25.2059	11.6176	40.7609	9.91625
759	4.36229e+06	5.5	8.14286	7.5	0.714286	9.28571	7.92857	48.3571	24.3571	6.14286	37.4494	9.93538
1281	3347498	3.6	4.6	8.2	5	7.4	5.4	41.8	21.8	3	38.1966	9.99272
1019	4.76821e+06	5.28125	8	7.90625	1.6875	8.0625	10.2188	51.5	23.375	12.5625	31.0882	10.0001
1085	2.74575e+06	6	5.33333	7	5.55556	11.1667	6.44444	62.1667	21.7222	3.55556	35.6388	10.0836
789	3.05196e+06	4.21429	9.21429	8.64286	8.07143	16.5	6.14286	46.2857	24.5714	5.5	32.0772	10.1437
554	786058	0.216216	1.43243	5.27027	0.297297	0.756757	0.0810811	4.81081	10.2703	3.7027	36.6337	10.1522
868	6.18808e+06	3.25	4.16667	8.08333	2.41667	4.66667	6.5	40.0833	18.9167	22.9167	28.2503	10.192
561	2.6645e+06	3.57143	4.78571	7.42857	4.64286	6.14286	3.92857	28.9286	18.5	6.21429	37.8678	10.2176
634	3.17561e+06	4.88889	8.38889	8.61111	7.61111	15.6667	5	52.2778	26	6	35.7218	10.2713
385	3.5145e+06	2.16667	7.16667	9.33333	2.83333	5.5	3.08333	32.4167	26.75	6.08333	34.2517	10.2722
1258	4.20406e+06	5.18182	7.54545	9.36364	2.36364	6.09091	5.81818	49.9091	27.0909	11	36.8133	10.3083
596	2.50509e+06	3.53333	5.13333	7.8	2.2	6.73333	6.6	33.4	15.1333	16.0667	38.5508	10.3356
622	2.99816e+06	4.91667	9.61111	7.38889	7.44444	15.3056	5.88889	53.9167	21.6944	6.47222	34.399	10.3393
406	3.2828e+06	6.14286	7.35714	8.92857	4.07143	9.71429	14.3571	55.2143	24.1429	6.85714	47.6065	10.3393
1251	1.76618e+06	3.65217	5.13043	7.86957	4.04348	8.3913	5.04348	44.2609	20.1739	2.08696	42.783	10.3397
468	2.75419e+06	2.55	5.75	7.4	3.75	5.9	7.25	31.25	22.75	11.95	37.0982	10.3795
1038	2.92312e+06	3.04762	2.80952	7.85714	2.38095	7.61905	14.2857	45.9048	16.0952	16.3333	40.9345	10.3799
1164	2.94737e+06	6.36364	4.18182	9	1	8.63636	16.9091	56.0909	20.8182	5.18182	39.2096	10.5312
1106	5.3409e+06	7	9.42857	7.71429	8	14.7143	20.8571	98.8571	25.2857	6.28571	31.6946	10.5372
284	4.05807e+06	5.60714	2.82143	6.46429	2.07143	6.17857	20.5714	60.6071	24.9643	16.5357	38.9132	10.559
456	1.3953e+06	0.235294	1.29412	4.47059	1.29412	3.11765	0.294118	7.11765	12.2353	6.23529	36.0734	10.631
763	1.63098e+06	0.5	1.42857	4.57143	5.35714	7.5	5.78571	29	11.2857	4.71429	45.0189	10.6405
930	1.36845e+06	2.7	2.2	5.9	0.4	1.9	7.7	34.3	14.7	3.5	39.2809	10.6417
310	3.12276e+06	6.90476	7.04762	8.09524	5.04762	11.381	6.52381	67.6667	22.8095	2.33333	36.0233	10.6728
1329	1.09848e+06	2.53846	0.846154	5.92308	0	3.15385	2.15385	20.5385	12.6154	0.461538	47.0249	10.6864
403	4.78175e+06	6	5.2069	8.31034	1.65517	5.82759	11.8966	44.9655	26.3103	12.1724	37.891	10.723
460	1.64741e+06	3.84615	4.38462	8.84615	1.76923	2.84615	2	22	13.7692	2.76923	38.4932	10.796
1066	4.59608e+06	8.8	7.2	9.1	8.8	16.7	11.3	81.2	27.1	2.8	41.4347	10.8163
495	1994529	3.1	6	6.7	4.4	10.6	1.6	30.1	17.1	3	39.6923	10.8817
744	681470	0	0.8	4.2	0.1	0.25	0	1.85	8.9	1.2	36.3411	10.9902
1249	2.78727e+06	2.76923	9.61538	8.57692	6.11538	11.7308	5.46154	56.5769	22.5	2.19231	36.9132	11.0091
542	2.07053e+06	2.33333	4.58333	7	2.08333	5.58333	4.66667	27.25	15.3333	7	39.1722	11.0971
1293	2.53558e+06	6.66667	8.83333	6.91667	4.75	11.25	3.16667	63.0833	19.0833	2.25	41.1956	11.1647
322	2.27039e+06	5.5	6.71429	7.92857	4.21429	6.07143	5.14286	33.2857	18.5	6.57143	35.6772	11.1997
752	2.66235e+06	5.69231	6.07692	6.69231	5.76923	11.7692	4.30769	48.0769	24.5385	8.61538	37.6358	11.3011
1151	1.47492e+06	2.71429	8.57143	6.42857	6.14286	11	1	28.8571	14.2857	3.42857	38.065	11.31
376	2.2697e+06	3.25	7.5	8.75	7.66667	12.0833	3.25	43.75	22	4.5	31.6631	11.3188
1233	3.17733e+06	4.33333	9.08333	9.58333	9.08333	14.75	3.58333	38.0833	20.5833	7.5	25.3943	11.3786
684	2.70297e+06	5.59259	4.37037	7.37037	1.96296	7.66667	6.11111	41.7037	25.3704	4.92593	35.5252	11.3866
782	4.91173e+06	6.76471	6.54902	9.68627	4.15686	7.62745	12.7255	54.7451	29.0588	12.0392	31.4435	11.4044
1313	4.27885e+06	0.833333	3.33333	5.27778	5.38889	9.38889	4.83333	31.7778	16.1667	17.6667	46.2144	11.4348
895	5.05472e+06	4.66667	5.33333	7.26667	2.8	7.73333	4.8	43.5333	19.7333	8.33333	34.9849	11.44
1139	2.92784e+06	9	8.14286	7.14286	9	18.7143	11.7143	68.5714	22	4.14286	39.8513	11.4577
651	4.56663e+06	4.16667	6.66667	9	4.5	11.75	4.79167	40.4583	27.0833	15.5	32.1468	11.5268
940	4.56805e+06	3	5.2	10.2	3.8	7.8	7	39.2	24.8	18.6	42.319	11.5421
783	4.37303e+06	5.11111	6.11111	10.3333	5.88889	8.11111	14.7778	48.3333	22.3333	12.1111	43.4255	11.5738
832	4.93787e+06	3	11.8333	10.75	11.1667	18.8333	7.08333	65.8333	31.4167	8.33333	35.9225	11.5992
610	2.79588e+06	4.4	4.4	8.3	2.2	3.9	11	43	19	6.4	43.8241	11.6022
768	3.00498e+06	4.17391	4.86957	8.6087	3.86957	6.13043	5.78261	34.8261	24.4783	5.13043	43.957	11.6095
357	1580126	5.5	1.91667	6.45833	0.0416667	1.54167	18.5	46.3333	13.8333	5.91667	41.2885	11.6116
1165	1.22815e+06	2.66667	2.16667	6.83333	0	4.83333	1	19	16.1667	1.33333	46.3848	11.619
1024	8200727	10	11	10	0	14	37	112	26	20	30.977	11.6627
924	2.33311e+06	3	7.125	9.625	6.875	7.75	1	21	22.75	2	31.555	11.6666
749	2.86754e+06	1.42105	6.42105	8.52632	3.84211	7.36842	8.68421	29.7895	23	16.1053	40.8833	11.7289
603	3.31814e+06	3.66667	6.66667	8.26667	3.26667	6.8	24.8	60	16	13.6667	34.6136	11.7824
1000	1.9812e+06	2.44444	5.22222	6.33333	2.55556	7.22222	1.11111	25.7778	16.6667	4.22222	39.3423	11.8016
1268	2.3671e+06	1.44444	3.88889	7.44444	4.11111	6.33333	6.33333	31.4444	18.3333	5.44444	43.6191	11.8088
1326	3.62996e+06	3	5.4	10.4	3	7.2	19.4	48.2	21.8	18.2	39.3032	11.8148
903	4.04617e+06	3.81818	4.36364	7.81818	3.63636	9.54545	5.45455	34	22.1818	20.5455	40.1132	11.8279
1007	4.58922e+06	5.46154	8.46154	10.4615	2.69231	6.30769	2.07692	47.1538	25	8.61538	37.6929	11.8342
1023	2.53582e+06	5.375	6	6.875	6.375	12	6.625	49.875	15.25	2.625	38.8198	11.8522
1018	3.41831e+06	6.04167	7.75	7.16667	0	7.25	5.45833	43.7917	23.7083	7.5	38.9163	11.8589
906	6.18308e+06	2.66667	6.55556	7.22222	4.55556	10.6667	5.66667	37.1111	25	6.33333	33.6555	11.9154
1257	2.71061e+06	4.08696	4	7.47826	2.78261	7.52174	6.30435	43	23.4783	13.7391	44.9477	11.9398
371	3.2602e+06	4.65	4.25	7.5	1.15	4.35	14.85	49.25	21.2	12.65	41.04	11.9693
1307	2440478	2.16667	2.83333	8.66667	3.5	7	12.3333	39	13.8333	11.1667	48.0269	12.019
1300	3.96339e+06	3.625	4.4375	7.9375	4	8.4375	12.1875	48	17.5	17.25	48.0437	12.1139
1285	2581832	3.25	3.875	9.375	0.375	4.625	3.25	33.5	26.125	6	40.0812	12.1776
1328	3.08571e+06	2.4	6.6	8.2	4.6	6.2	3.4	34.2	22	8.6	45.3619	12.1817
308	2.66902e+06	5.83333	4.77778	6.72222	0.611111	7.83333	11.7778	58	19.5	5.5	41.6806	12.1839
502	4.12629e+06	2	5	8.25	3.25	6.5	11.25	38.75	18.5	22.5	40.4261	12.1952
416	4.75781e+06	3.8	7.12	8.56	6.28	12.76	6.12	49.72	24.48	8.12	35.8138	12.2203
409	2.46133e+06	3.4	7.8	5.4	4.8	9.4	8.6	50.6	18	2.4	39.4705	12.2787
461	3.35618e+06	4.33333	4.41667	7.75	5.25	10.25	4	39.1667	20.25	7	33.7069	12.2798
949	1.3418e+06	0.4	1	2.8	4	8.6	3.8	22	10	1.8	52.0789	12.2806
1275	3.78427e+06	4.72727	8.45455	8.09091	6.09091	17.3636	5.72727	53.3636	24.2727	3.54545	36.5488	12.3122
950	3.53235e+06	6.6	5.85	9.15	3.1	8.75	22.3	72.15	19.1	11	43.2681	12.3211
1312	3502876	3.91667	5.75	9.5	5.5	10.5	10.0833	51.8333	29.0833	16.4167	42.8505	12.3379
497	3.84269e+06	5.75	3	6.25	2.75	7.75	19.25	50.5	17.5	16	40.6809	12.3663
673	3.10391e+06	4.66667	5	7	2.83333	6.58333	11.5	42.5833	21.6667	12.5	38.0057	12.3669
657	1.59936e+06	1.5	3	3.5	2.25	3.75	1	13.5	13.25	3.5	40.6871	12.3703
808	3.5051e+06	5.25	6.25	9.16667	6.25	12	6.41667	57.8333	23.1667	4.83333	39.2785	12.3846
670	1.77607e+06	3.58333	2.91667	4.75	0.333333	2.58333	8.5	36.25	15.5	6.33333	40.8433	12.3995
693	1108943	3.4	3.2	5.6	3.6	4	0.2	17.4	11.8	1.2	36.1862	12.4077
745	849408	0	0.666667	3.83333	1.33333	1.83333	0	1.66667	9.16667	3	37.675	12.4095
1063	4756289	3.15385	5.38462	8.07692	1.92308	6.69231	3.69231	33.0769	19.8462	8.07692	36.7972	12.4147
1331	2.01051e+06	2.81818	3.63636	6.90909	4.18182	8.63636	7.45455	33.8182	14.5455	13.9091	49.2337	12.4184
1309	7.48988e+06	4.30769	4.84615	9.30769	4.84615	7	1.53846	46.9231	29.2308	10.2308	40.7903	12.4643
963	1.55892e+06	0.25	4.125	6.375	5.25	9	3.375	25.25	13.875	5.25	45.7367	12.4775
1167	1.14542e+06	1.75	4.75	8.25	4.5	4.5	1	17.5	15.75	2	38.6282	12.5018
1339	1.31128e+06	1.2	3.8	5.2	2.2	4.2	1.2	20.2	14.2	3.2	52.9694	12.5292
844	3.26146e+06	2.69231	5	8.53846	3.76923	7.69231	6.15385	35.8462	19.3846	19.2308	32.824	12.5836
943	2.73209e+06	1.14286	3.71429	8.14286	4.57143	5.28571	2.57143	26.4286	13	7.28571	45.6531	12.6029
423	4.57992e+06	6.60317	7.96825	9	5.93651	13	5.46032	66	25.873	5.92063	39.6094	12.6079
1054	2.02736e+06	2.9	6.6	8	1.4	6.2	0.5	21.5	16.6	9.8	37.4405	12.668
1118	4.76568e+06	6.26667	6.73333	8.93333	2.86667	5.73333	9.33333	47.6667	24.6	16.3333	33.6753	12.6785
1194	4.38209e+06	3	6.625	9.25	6.625	10	8	36.875	27.1875	15.6875	30.6033	12.6945
995	3.61263e+06	6.42105	6	7.84211	9.31579	16	3.15789	62.0526	22.9474	3.42105	41.0289	12.7013
1026	2452806	4.5625	4.125	7.1875	1.1875	4.5625	10.4375	44.625	19.1875	10.5625	39.2813	12.716
646	4.07545e+06	7.66667	8.33333	7.96296	8.18519	16.037	5.92593	70.8519	25.037	2.55556	42.0126	12.7187
781	3.81027e+06	2.70588	5.64706	6.64706	2.41176	5.41176	4.94118	35.7647	20.4118	5.70588	36.4189	12.7343
408	3.64319e+06	2.67647	7.76471	8.70588	4.26471	9.94118	2.32353	31.1765	24.5	12.0882	33.4508	12.7555
659	2.70405e+06	2.92857	4.57143	7.64286	4.5	5.96429	4.57143	28.4643	21	5.64286	37.2271	12.7928
386	6.53111e+06	3.39286	6.71429	7	2.21429	6.96429	3.35714	38.2857	21.8214	5.89286	34.5696	12.8005
644	2.38707e+06	3.3617	9.61702	9.23404	3.91489	9.46809	4.25532	45.1277	24.4255	3.82979	38.6691	12.8312
806	1.33393e+06	2.42857	3.28571	5.85714	4.28571	7	1.14286	26.2857	11.7143	2.71429	47.1152	12.875
619	3.41118e+06	6.92308	10.8462	8.5	5.96154	12.9231	10.1923	55.3462	20.9231	5.23077	35.1104	12.9039
571	3.50017e+06	2.52174	6.04348	9.13043	5.13043	8.13043	10.1304	37.2174	23.7826	16.087	34.2531	12.9086
1005	2.72371e+06	7.57692	8.11538	5.61538	7	13.3846	4.5	66.6923	17.8846	2.65385	45.6638	12.9364
325	4.74135e+06	2.87255	6.67647	8.61765	3.79412	9.91176	4.63725	37.4118	26.1667	18.2941	32.0409	12.9449
971	4.31714e+06	3.71429	5.33333	8.42857	3.52381	8.52381	10.2857	42.4762	24.9524	18.381	38.4986	12.9592
958	3.41305e+06	7.375	4.75	7	5.875	12.75	5.625	55.75	18.75	3.25	42.605	12.9612
855	4.35683e+06	7.83333	11.0833	9.02778	7.44444	15.6667	8.5	71.5556	22.8333	5.63889	34.6304	12.98
677	1.85661e+06	4.13333	4.26667	6.8	1.26667	4.66667	5.2	33.1333	21	3.8	36.2741	12.9942
757	2.04573e+06	2.67857	4.35714	6.25	1.67857	5.21429	2.96429	29.9286	14.7857	5.46429	38.0832	12.9951
1041	2.14859e+06	2.11111	5	6.55556	4.22222	6.44444	3.88889	28.8889	18	2.33333	44.6872	13.0174
756	3.261e+06	6.17647	5.82353	8.11765	6.23529	11.8235	4.29412	54.2353	21.2353	3.17647	38.1128	13.0484
280	2.52728e+06	3	4.85185	6.64815	7.05556	9.46296	3	26.5926	19.9815	5.83333	36.4724	13.0617
820	2.21862e+06	3.18182	4.72727	8.72727	4.36364	6.90909	4.54545	26.2727	20.4545	3	35.6944	13.0679
645	5609790	4.69231	5.15385	7.03846	5.19231	9.96154	9.65385	53.9231	20.9231	12.2692	30.4206	13.1256
429	3.33088e+06	7.32	8.2	7.82	8.46	14.92	5.76	68.34	23.18	3.12	42.502	13.1537
831	1665208	1	4	7.8	2.6	4	7.8	22	19.6	5.8	39.6208	13.1627
1299	789448	0.944444	0.944444	5.94444	0.0555556	3.16667	0.777778	15.2778	9.66667	0.777778	47.8682	13.1782
1082	3.95308e+06	5.23077	3.46154	6.76923	3.61538	6	9	47.4615	16.1538	13.3846	33.4299	13.2128
587	2.42549e+06	3	4.5	8.33333	1.83333	6	3	25.3333	15	8.33333	37.84	13.2139
426	5.38926e+06	6.23529	5.76471	6.64706	6	9.47059	8.64706	48.9412	19.7059	19.4118	29.9099	13.2178
908	4.14612e+06	3.78571	6.85714	7.5	1.14286	5.71429	17.6429	48.7857	18.2143	14.2143	37.7742	13.2599
1095	5.57855e+06	5.67568	9.62162	9.62162	2.78378	6.81081	16.2432	55.1892	31.7568	16.1622	31.1758	13.2764
1048	3.10316e+06	5	8.58333	7.5	6.08333	11.6667	3.58333	43	24.0833	4.33333	35.7524	13.3011
593	858914	0.142857	1.19048	5.42857	0.333333	0.52381	0	2.80952	10.5714	2.19048	43.4099	13.3049
676	2.33101e+06	5.5	4.92857	7.92857	1.14286	3.28571	5.5	34	17.7857	7.57143	38.2028	13.3304
1262	2.32756e+06	2.42857	7.33333	9.61905	6.28571	11.4286	3.38095	40.4286	20.4286	3.57143	47.5151	13.3481
349	5.71731e+06	6.40909	7.59091	9.40909	4.93182	10.0455	10.9773	55.0227	28.75	16.1136	30.853	13.404
880	2.88124e+06	4.125	8.375	9.625	7.625	14.25	3.625	37	24.125	7.5	31.991	13.4104
732	2.26986e+06	2.16667	8	6.16667	6.83333	14.1667	1.83333	39.8333	24.3333	6.83333	35.8191	13.4759
884	1.59682e+06	2.85714	6.37143	7.02857	3.37143	7.54286	3	31.2857	18.2571	2.97143	39.2434	13.5449
533	2.36486e+06	3.76923	3.53846	6.84615	0.846154	3.53846	10.0769	37.9231	16.7692	7.61538	44.6263	13.5735
1068	3.0027e+06	7.21739	9.17391	8.13043	5.47826	11.7391	5.17391	66.8261	23.913	3	36.2448	13.5879
1150	4.30795e+06	8.26667	7.6	7.73333	9.86667	18.4667	6.46667	67.8	25.4667	3.66667	42.2499	13.5958
656	1.69161e+06	2.35294	3.64706	4.47059	5	7	2.11765	20.4118	14.1765	4.70588	38.1291	13.6289
56	2.55909e+06	4.25532	6.38298	9.0922	1.46099	6.00709	4.07092	35.8156	18.844	5.4539	36.7868	13.6632
713	5.62235e+06	3.92308	7.07692	8.38462	3.84615	7.61538	6.38462	43.6154	26.3077	10.6154	34.3627	13.671
942	4.04765e+06	1.8	3.8	6.8	1.2	3.8	3	33.4	13.8	9	34.6358	13.6812
910	2.81348e+06	1.8	6.43333	7.66667	3.23333	9.43333	1.46667	31.2667	20.7333	5.36667	37.675	13.6938
945	3.68331e+06	2.61905	4.64286	8.30952	3.83333	7.11905	6.19048	40.2381	25.2143	9.90476	45.3731	13.7057
665	2.59607e+06	4.10345	4.34483	8.10345	0.965517	4.65517	12.7241	44.7586	19.5862	7.68966	39.9201	13.7295
983	4.21463e+06	6.28125	10.3125	7.90625	7.1875	14.8438	7.0625	68.875	23.5938	4.875	35.7928	13.7584
934	2.15322e+06	2.67647	4.58824	8.5	4.23529	6.47059	4.82353	27.0882	20.3824	3.82353	45.2682	13.7734
615	2.11091e+06	3.55	8	8.85	3.75	8.725	3	40.25	22.1	3.625	38.7868	13.7738
973	1.65058e+06	0.818182	4.18182	8	3.36364	4.90909	3.90909	18.0909	14.3636	3.54545	48.0942	13.7746
365	3.67354e+06	4.69231	3.69231	8.15385	4.38462	9.53846	16.3077	49.3846	20.9231	13.3077	43.2705	13.8177
1287	887310	0	1	4.5	0.75	1.625	0	2	12.75	2.625	51.6165	13.8345
311	3.63198e+06	3.26415	5.50943	7.13208	8.07547	11	3.71698	33.9245	23.2453	7.33962	33.1242	13.8863
1266	2890518	4.07692	3.53846	6.23077	1.61538	5.46154	13.9231	43.1538	18.5385	9.46154	42.8629	13.8887
897	4.80509e+06	7.42857	11.4286	9.57143	7	15.1905	8.61905	68.4762	25.2857	8.2381	34.5111	13.9028
1259	4.20522e+06	7.81818	4.27273	8.54545	2.45455	9.27273	18.1818	58.0909	19.7273	13.0909	42.5404	13.9568
422	5.19558e+06	6.02857	6.68571	9	5.48571	8.4	10.5143	46.2	28.5714	12.0571	29.1878	13.9894
770	1287018	1.25	1.75	2.25	1	1.75	8	22.5	14.25	8.25	42.6339	14.0076
559	2.7375e+06	4.88889	2.88889	5.22222	4	9.44444	12.5556	42.3333	15.8889	8.33333	49.7905	14.0408
594	3.95949e+06	6.8	5.2	9.65	6.4	12.95	12.25	75.8	23.4	5.2	39.8884	14.058
888	2.50234e+06	1.2	8	7.73333	6.46667	10.4	2.86667	37.8667	21.1333	3.66667	36.1182	14.0599
1269	2.84827e+06	2.35714	9.57143	11.5	7.5	13.2143	4.64286	48	22.7857	4.21429	46.6199	14.0626
438	1.75229e+06	2.25	5.33333	7.41667	6.08333	11.6667	1.75	35.5	19.1667	2.16667	40.9437	14.1119
608	4.6113e+06	6.25	5.25	9.5	7.7	11.45	4.9	54.6	28.9	3.9	38.5494	14.1151
2	4.71751e+06	3.01064	7.81915	9.59574	5.03191	10.8617	3.85106	38.3617	27.5532	17.1596	31.6625	14.1668
932	3.83545e+06	5.42222	4.62222	7.31111	2.44444	8.17778	17.5111	55.5333	21.6	11.4222	42.5518	14.2217
1212	2.23051e+06	4.92308	2.15385	7.15385	0.692308	2.07692	15.5385	49.6923	14.8462	11.3077	40.0843	14.2223
956	2.57932e+06	1	4.55556	7	5.88889	7.55556	3.44444	22.4444	20.3333	5.11111	44.6203	14.2317
448	3.62206e+06	5.65854	9.2439	8.65854	5.95122	13.0976	6.82927	57.561	20.5122	6.5122	36.4053	14.2404
935	2.28572e+06	3.625	3.375	7.625	0.25	6	1.5	27.875	21.5	5.625	39.4507	14.241
1296	4.23292e+06	2.625	7.375	10.5	8.625	12.125	6.25	33.125	21.125	9.375	42.3908	14.2704
549	1.98177e+06	3.75	2.58333	5	1.5	3.33333	9.58333	34.5	16.5833	8	42.5119	14.2709
878	5.19286e+06	8.125	10.6667	9.41667	4.66667	12.8333	7.54167	81.2917	27.9167	6.41667	35.2552	14.3075
978	2.477e+06	2.78571	3.28571	5.78571	3.42857	6	8.35714	36.9286	11.8571	17.2857	36.904	14.3092
912	4.04595e+06	3.375	7.25	8.875	3.875	12.125	2.1875	38.125	25.5625	5.75	37.4261	14.3252
858	3.81948e+06	6.1519	11.5063	9.89873	8.3038	16.4051	9.77215	72.1139	24.5063	4.82278	34.0025	14.3368
625	2.84579e+06	6.71429	4.57143	7.14286	5.21429	8.35714	15.6429	65.0714	25.1429	7.07143	43.8301	14.3444
1317	1.98618e+06	1.71429	2.92857	7.21429	6.14286	7.78571	2.57143	26.9286	14.4286	1.28571	55.3547	14.3458
580	752954	0.0625	2	4.6875	1	1	0	2.875	7.75	3.75	36.6486	14.3466
380	4.1403e+06	4.27778	7.83333	7.05556	1.22222	4	7.38889	36.2778	20.0556	11	38.3105	14.364
1001	1754189	2.6	6.6	6.2	5.6	13	3.6	41.6	14	3.2	35.0653	14.3713
415	5.73984e+06	3.90476	5.7619	7.38095	3.04762	5.57143	7	42.5238	24.0952	13.6667	32.9274	14.4212
604	3.00137e+06	4.73333	6.33333	9.26667	5.8	9.86667	1.8	43.4	21.3333	4.26667	39.0108	14.5102
531	3.50051e+06	6	9	7.23333	4.93333	11.3333	6.46667	61.3333	21.9	3.13333	36.3575	14.6324
1111	3.39797e+06	4.82353	8.70588	8.76471	5.52941	11.7059	6.41176	52.5882	20.7059	4.41176	36.3049	14.6328
467	3.49783e+06	2.82051	6.38462	8.05128	4.23077	8.58974	2.4359	31.1795	24.8718	12.2308	33.4277	14.6435
1271	5.6325e+06	5.73684	4.36842	8.05263	4.52632	12	19.9474	68.4737	26.1579	13.9474	43.1782	14.6654
410	2.5843e+06	3.36842	7.78947	8.31579	5.42105	11.4737	2.68421	34.1579	20.6316	4.73684	33.0045	14.7093
724	3.11015e+06	6.3125	7.25	7.83333	5.625	12.1042	6.25	52.8333	20.1667	2.97917	36.109	14.7331
778	3.12592e+06	4.33333	6.83333	7.33333	6.66667	12.8333	4.66667	41.1667	19.6667	9.83333	28.2956	14.7642
1297	2.88126e+06	6.53846	5.73077	8.11538	3.46154	9	16.7692	65.8462	19.3846	3.73077	44.5611	14.7729
836	2.74317e+06	3.25714	4.57143	8.28571	7.77143	12	5.22857	45.5143	20.5143	3.45714	46.3014	14.7936
529	2.15493e+06	2.18182	4.72727	8.90909	6	10.8182	2	29.2727	18.3636	3.09091	41.6097	14.809
944	2.67266e+06	0.5	3	5	0.75	2.75	7.5	21.5	11.25	14.75	44.8804	14.8263
307	4.5453e+06	2.83333	4.75	7.75	3.91667	7.33333	5.91667	38.1667	21.4167	9.58333	35.2047	14.8455
964	3.77049e+06	6.375	8.25	9.25	6.625	13.125	1.5	43.75	24.125	4.25	36.4944	14.8797
459	4.85758e+06	8.26316	10.1404	8.40351	5.31579	13.7368	10.193	76.5789	21.8947	5.12281	35.544	14.8944
401	5.33234e+06	4.03333	5.96667	8.73333	3.66667	7.8	9	43.3	24.2333	12.2	31.3077	14.9024
968	2.51743e+06	4.69231	5.84615	9.15385	4.61538	6.76923	5.23077	36.2308	20.6923	5.46154	41.057	14.9367
283	1.94593e+06	4.10345	1.24138	5.65517	0.0689655	3.93103	0.0344828	28.1034	13	7.44828	40.2326	14.9422
452	2.3614e+06	3.33333	3.22222	5.22222	4	7.22222	7.11111	32.8889	12.8889	8.44444	37.6681	14.9609
1042	3.06843e+06	4.72727	3.22727	7.72727	4.22727	8.36364	11.7273	42.6364	17.8636	11.6818	50.6005	14.9741
866	3.20081e+06	2.54286	6.71429	7.62857	3.68571	9.08571	0.885714	29.4857	25	8.22857	34.9364	15.0636
1052	2.99425e+06	5.33333	8.33333	9.33333	7.83333	16.1667	3.66667	48.3333	22.1667	4.66667	36.4327	15.0661
1336	4.32024e+06	4.15385	3.46154	7.30769	4.23077	8.92308	19.2308	57	24.6154	16.6923	45.0286	15.0943
639	5.08737e+06	2.35714	5.14286	6.92857	2	5.5	5.14286	31	20.0714	5.92857	36.4279	15.1029
628	2.72851e+06	2.73333	6.93333	10.0667	4.86667	8.06667	1.06667	39.4	19.3333	3.86667	42.0399	15.1381
817	1.91845e+06	1.51852	4.74074	9	5.33333	9.07407	3.48148	32.1852	16.7407	3.11111	48.9921	15.1614
1227	533845	3.63636	2.90909	7.36364	0	0.0909091	1.63636	12.1818	7.36364	1.27273	41.1728	15.1948
1102	2.41062e+06	6.78571	4.21429	5.71429	7	13.8571	2.78571	51.0714	19.6429	2.71429	43.3825	15.2166
1333	4.71482e+06	2.75	2.75	4.25	4.75	8.25	6.25	37.25	18.5	19.25	42.9536	15.2279
360	2.37239e+06	3.64	4.12	8.76	3.44	5.44	1.48	32.28	24.2	6.76	41.4653	15.2795
939	4.82086e+06	3.5	5	9.25	5.75	8.25	10.75	43	15.5	14.5	44.1813	15.3648
1107	3.88628e+06	4.73333	8.33333	5.53333	3.46667	10.1333	9.53333	61.9333	18.6667	3.33333	37.4888	15.3793
1039	1.45338e+06	4.36364	2	6.18182	0.818182	2.45455	8.27273	32.5455	18.2727	3.72727	41.4852	15.4699
848	5765461	4.56	7.24	10.2	2.52	6.4	5.76	47.68	23.48	23.88	24.5828	15.4751
1040	3.13137e+06	4.75	4.5	8.875	4.25	7.5	14.25	48	20.625	9.625	49.4737	15.4858
1006	3.94645e+06	6.75	9.6875	10.625	7.875	18.5625	1	52.875	25.0625	4.9375	37.0659	15.5234
1261	3.30196e+06	6.3	8.7	9.8	10	15.4	5.9	72.6	19.6	2.6	39.8476	15.5551
1319	2.0396e+06	1	5.6	7.2	6.2	11.2	2.4	34.4	18.1	2.2	44.5784	15.5928
407	2399415	3.10714	5	8.07143	1.67857	6.89286	3.46429	34.3571	18.25	4.10714	46.6594	15.6285
444	2.95007e+06	3.91304	7.30435	10.0435	7.65217	13.1739	3.21739	45.5652	22.8696	4.08696	36.7128	15.6289
993	4.21471e+06	3.90909	3.36364	5.27273	2.45455	6.36364	6	36.9091	17.7273	13.1818	34.5897	15.6438
807	1.9287e+06	3.22222	5.44444	8.44444	5.44444	8.66667	0.555556	36.3333	15.7778	3.22222	47.4841	15.7245
1086	6.3513e+06	6.125	8.9375	5.5	0.875	9.375	14.9375	55.25	24.0625	14.4375	31.1854	15.7278
1065	7.33322e+06	3.11111	7.44444	8.66667	3.22222	10.6667	4.66667	38.7778	23.5556	5.44444	34.089	15.8025
1071	4.17291e+06	1.75	4.625	6.875	2.25	5.75	5.5	31.25	19	6.125	29.535	15.8582
366	2.80275e+06	4.66667	5.66667	10	5	7.33333	11.8333	56.3333	18.1667	9.33333	43.7223	15.8586
528	2.54223e+06	3.66667	3.41667	7.70833	2.91667	5.5	6.70833	38.1667	24	13.9583	46.034	15.8848
1277	2.94384e+06	3.70588	4.35294	7.58824	4.64706	7.88235	4.88235	32.3529	21	5.64706	43.3856	15.9237
766	2.80379e+06	3.70588	6.05882	8.05882	6.11765	10.0588	3.76471	50.4118	19.9412	2.23529	41.9598	15.9467
1109	3322813	2	6.5	7.5	4	6.1	3.8	27	23.5	7.9	36.2741	15.9486
445	5.01542e+06	4.25	8.68056	9.56944	3.80556	10.6389	2.41667	36.5972	28.0278	9.34722	31.1108	15.9974
824	1.09387e+06	2.46154	0.923077	4.76923	0	3.30769	2.69231	21	9.84615	1.38462	48.5186	16.0057
686	1.90339e+06	4.16667	4.33333	4.83333	0	5.16667	11	41.3333	16	6	42.4276	16.0966
1254	1.95619e+06	3	7.58333	7.91667	5.08333	9.08333	0.75	34.3333	20.0833	3.33333	41.241	16.1087
969	3.49988e+06	3.31818	4.72727	8.68182	4	8.09091	8.81818	41.8182	27.0455	14.6818	46.0317	16.1611
843	4.24655e+06	7.86957	7.30435	6.1087	5.56522	9.80435	25.3043	79.0435	17.8043	11.5652	33.0047	16.1718
1315	2.47514e+06	3.5	4.58333	8.33333	6.91667	8.83333	4.25	34.8333	18.8333	5.5	48.5178	16.1983
1009	3.14178e+06	6	5.16667	8.875	1.625	5.79167	14.4167	52.9583	20.6667	8	40.0872	16.2459
1272	1.64988e+06	0.25	5.75	8.3125	4.5625	8.75	3.5	32.375	15.9375	2.0625	55.3741	16.2475
965	2.32087e+06	2.3	2.3	5.9	0.3	6.1	2.1	26	13.3	2.6	41.3985	16.2606
689	1.95633e+06	1.625	3.25	5.875	2.125	3.625	2.125	22.375	12.75	2.625	39.5906	16.3051
611	2572166	3.25	3.0625	6.6875	4.3125	7.9375	2.6875	31.625	14	14.875	33.5329	16.3214
1308	3.42748e+06	5	4.23077	8.23077	5.84615	11.1538	3.76923	48.3846	25.3846	3	44.0724	16.3732
1169	1.9384e+06	3.66667	3.58333	6.16667	1.75	4.66667	10.6667	34.4167	19.9167	6.16667	40.3236	16.4148
437	2.42924e+06	1.35833	6.54167	8.6	1.6	6.31667	2.225	29.3167	18.1583	5.05	36.5348	16.4203
1291	2.3678e+06	1.5	4.25	6.25	5.5	8.75	5.33333	25.0833	21.5	3.66667	42.8501	16.4463
960	3.80574e+06	5.29412	5	7.44118	6.08824	11.4412	5.73529	56.4706	20.8529	4.14706	41.3129	16.5139
1103	5373521	4.875	5.625	6.75	5.5	8.125	8.375	45.25	21.5	21.625	30.7385	16.5416
946	1.34724e+06	1.88889	1.11111	5.88889	0	2.77778	1.55556	15.7778	8.33333	2.11111	48.2266	16.5919
952	2.12253e+06	1.4	3.68	6.56	6.04	7.08	1.88	25	13.08	2.6	57.283	16.6401
582	3.6301e+06	2.91429	6.65714	9.6	6.74286	11.4857	3.94286	48.1429	23.0286	2.05714	47.9089	16.681
479	2.26172e+06	5.5	4.2	8.6	0.6	6.4	3.5	41.3	18.4	2.3	39.3778	16.759
433	2.8874e+06	2.33333	6.55556	6.27778	6.88889	11.5556	3.11111	27.3889	19.8889	7.05556	37.5437	16.7789
1265	2.03296e+06	0.8125	5.4375	9.3125	6.375	10.6875	4.75	30.3125	18.875	4.0625	48.8375	16.7928
815	1.4549e+06	1.88235	1.29412	5.97059	0.0882353	5.73529	1.82353	24.1176	13.5294	1.47059	44.8576	16.8589
892	3.39661e+06	6.2	9.15	10	6.4	12.65	10	62.6	24	3.65	37.2435	16.8806
972	3.83945e+06	2.85714	5.14286	8.64286	4.57143	9.07143	7.21429	40.4286	19	21.5714	36.4987	16.9297
496	1.61908e+06	2.25	7.53125	7.71875	3.5625	7.46875	3.375	32.0312	19.1562	2.9375	40.0189	16.9507
605	3.14512e+06	2.80952	5.85714	8.09524	4.71429	8.19048	4.09524	43.5238	17.8095	2.09524	46.388	16.9764
1273	4.23647e+06	3.56522	9.21739	10.1739	8.82609	15.6957	7.13043	51.2609	25.3043	4.65217	38.1892	17.0446
1255	4.8705e+06	3.11765	6.47059	9.88235	3.88235	10.3529	9.17647	46.1176	25.8235	14.0588	36.841	17.09
558	2.9548e+06	3.58333	4.16667	7.08333	1.16667	5.66667	6.83333	37.8333	16.0833	7.33333	40.0466	17.094
637	3996252	3.11111	4.77778	6.66667	2.22222	6.33333	4.33333	36.8889	19	11.1111	32.0646	17.1171
753	4.26183e+06	7.57143	6.33333	8.59524	6.45238	12.8095	8.45238	69.5714	24.119	3.33333	36.8288	17.1577
588	2.67654e+06	2.78571	4.42857	9.19048	9.64286	14.119	2.69048	40.2857	19.0238	2.5	45.6366	17.1605
1280	3.18534e+06	8.61538	7.76923	9.38462	6.76923	16.1538	4.69231	68.3846	20.3077	2.84615	40.8641	17.1774
955	3.32957e+06	0.833333	3.83333	7.33333	1.83333	4.5	1.5	26.1667	14.8333	16	45.4187	17.2388
775	3.42319e+06	2.63158	3.89474	8	5.57895	9.21053	10.5263	37.5789	19.6316	14.5263	44.7047	17.313
472	2.75325e+06	5.33333	6.05556	7	5.83333	11.5	3.72222	58.1667	20.5556	2.83333	41.0912	17.3216
609	4.21874e+06	4.42105	8.47368	9.42105	8.52632	12.2105	1.36842	45.1579	21.5789	6.57895	43.7861	17.3515
1323	3.07858e+06	5	3.66667	8.25	4.08333	7.91667	4.91667	37.8333	22.1667	9.41667	50.7094	17.396
314	2.36906e+06	3.6087	5.08696	8.26087	5.78261	9.08696	3.91304	39.3478	16.5217	2.47826	40.9244	17.4406
765	1.46043e+06	2.62963	1.66667	5.51852	0	4.51852	0.925926	26.4815	13.2593	3.37037	45.221	17.4602
1276	2.57014e+06	2.33333	6.33333	8.75	7.5	11.9167	3.58333	41.1667	20.0833	3.5	46.6935	17.5294
478	2.39721e+06	4.52632	8.84211	9.10526	4.63158	10.4211	5.31579	52.8421	24.7895	3.52632	36.8399	17.5353
1203	1.60556e+06	1.94737	1.94737	6.84211	1.42105	4.78947	0	22.2105	13.3684	5.89474	50.6769	17.5472
527	1.56776e+06	1.65	3.2	4.25	4.1	8.65	0.95	24.4	14.1	3.7	39.7397	17.5587
1337	1731420	3.5	2	6.5	0.25	6	4.25	31.75	10	2.5	45.1608	17.6054
861	4.82522e+06	3.25	6.4375	8.375	3.78125	6.28125	6.1875	35.0938	25.4688	19.9062	37.0157	17.6095
1045	5.01931e+06	3.91667	5.75	9.16667	2.58333	6.83333	8.08333	45.5	27	18.4167	38.2279	17.6342
1207	805914	4.09091	3	7.63636	0	0.181818	6.90909	25.1818	10.9091	1.18182	39.816	17.6906
933	1.81481e+06	2.58333	1.91667	5.625	0.291667	5.625	2.16667	26.7083	11.7917	3.16667	46.8667	17.7156
702	3.10979e+06	2	10.3	9.9	11.2	15	2.1	45.8	23.8	4.4	32.8829	17.7264
1318	2711789	2.16667	5.5	9.38889	3.38889	6.55556	6.55556	33.4444	21.7778	5.05556	46.3113	17.7716
1321	2.9789e+06	4.14286	6.42857	9	3.28571	7.28571	17.1429	52.8571	19.2857	8.57143	44.1716	17.7956
804	2.03606e+06	5.2	3	6.53333	0.733333	5.53333	4.93333	34.5333	15.3333	7.33333	46.1438	17.8052
1301	3.78829e+06	5.2	3.2	7.8	3.4	6.6	14.8	50.8	17.8	12.4	46.5876	17.8357
658	5.82089e+06	5.42857	10.8095	9.42857	3.09524	9.28571	8.2381	59.6667	23.0952	7.61905	30.0233	17.9072
728	1.68076e+06	1.05263	5.84211	6.52632	7.84211	9.57895	0.684211	30.8947	17.6316	3.26316	36.4168	17.9305
551	2202274	5	7.66667	10.1667	6.83333	12.3333	0.5	48	18.6667	4	40.3262	17.9998
368	1.86619e+06	1.83333	4	6.66667	2.16667	6.33333	0	25	14.8333	3.83333	44.5921	18.0267
1288	2.88274e+06	5.625	4.58333	8.33333	0.958333	4.75	16.0417	54	19.9167	7.66667	41.7372	18.0434
1302	3.04283e+06	6.3	4.4	8.9	6.3	11.3	8.1	54.4	19.1	2.5	47.4007	18.2085
822	2.04325e+06	3.18182	4.09091	7.09091	5.90909	9.81818	3.63636	38	16.3636	4.18182	47.47	18.3097
1284	4.79813e+06	5.27778	6.55556	9.22222	2.38889	7.11111	10.2222	54.7778	29.2222	15	37.3531	18.3157
1178	2.16238e+06	2.86842	3.39474	8.26316	1.47368	4.81579	0	32.2105	17.6316	6.34211	49.7434	18.3772
526	3.32339e+06	6.18182	4.09091	8.27273	6.36364	11.7273	5.36364	60	25.8182	2.90909	43.6211	18.4428
465	3.14584e+06	6.24561	4.70175	6.89474	4.68421	9.68421	4.03509	52.9123	19.5789	3.77193	40.1426	18.5236
1035	3.5174e+06	3.25	5.75	8.5	4.25	6.25	1	32.5	27.75	8	36.7637	18.5265
1320	3138847	6.16667	3.5	6.66667	3.66667	6.16667	16.3333	53.5	20.3333	10.3333	47.6694	18.6344
1099	1.982e+06	4.78261	4.52174	5.26087	3.56522	8.91304	2.3913	45.2609	16.9565	2.78261	43.2584	18.6708
1298	2.93429e+06	1.83333	4.38889	6.66667	3.55556	6.16667	6.22222	32	14.3889	15.0556	40.2542	18.8507
1043	1.09448e+06	2.77273	0.772727	5.09091	0.272727	3.86364	0.272727	20.5455	12.7727	0.636364	50.4841	18.8728
404	4.2873e+06	2.625	6.58333	9.375	5.29167	12.6667	3.16667	42.25	22.4167	7.16667	35.759	18.8927
735	4.48866e+06	2.35714	5.07143	6.64286	3.28571	7.35714	3	30.7857	18	13.4286	41.692	18.9043
1263	1.72071e+06	1.8	5.9	8.8	3.5	7.4	4	29.6	18.1	3.2	43.02	19.0897
583	2.80349e+06	3.57143	6.46429	8.10714	6.46429	9.42857	3.07143	45.0357	19.5	1.85714	40.5181	19.1009
424	4.03895e+06	3	5.84615	9.53846	4.76923	10.3846	3.07692	31.3077	24.6154	18.3846	38.6018	19.1118
581	3.31905e+06	2.4	6.77778	10.2889	5.53333	10.6444	3.31111	42.2667	21.8	5.91111	34.6358	19.1846
1264	3.6586e+06	5.90476	3.28571	7.04762	5.28571	10.1429	8.33333	59.1429	19.8095	3.19048	44.445	19.4497
1078	4.3233e+06	2.47059	5.29412	7.82353	3.58824	6.29412	7.70588	40.0588	20.8235	12.0588	40.5908	19.4632
367	3.26306e+06	2.5	11.4	8.9	9.1	17.4	0.8	55.4	22.7	3.3	38.0156	19.5136
1305	1.88111e+06	1.53846	5.46154	10.2308	7.15385	11.0769	0.923077	31.6154	17.3077	2.46154	47.2028	19.5418
1327	3.6605e+06	4.09091	4.90909	8.45455	4.27273	8.27273	5	48.5455	22.3636	6	41.3361	19.5823
1338	1.40589e+06	2.76923	3.69231	5.92308	5.07692	8	1.84615	24.8462	14.7692	1.92308	48.7038	19.6471
747	3.68067e+06	7.1	4.95	8.55	5.35	11.1	4.9	62.45	20.9	5.7	38.3224	19.6971
901	2.21714e+06	2.15385	5.11538	8.23077	4.46154	6.92308	6	33.6154	19.6154	3.42308	48.4782	19.7198
754	3.83561e+06	6.52381	7.38095	8.71429	6.19048	12.7143	8.85714	74.0952	23.9524	4.2381	35.9442	19.7746
1314	3.94816e+06	5.30769	4.69231	9.15385	1.84615	6.15385	14.6923	50.4615	21.2308	10.5385	41.172	19.7872
764	1.33852e+06	3	3.66667	4.33333	2.66667	6	0.666667	24.3333	6	2	51.2082	19.8556
811	1840966	3.36364	1.21212	5.81818	0.121212	4.78788	1.27273	27.6667	13.5152	3.39394	46.0692	19.8638
1290	4584033	7.33333	5.44444	9.11111	7.66667	17.3333	6	68.6667	26.5556	3.44444	41.9188	19.8844
819	4.46705e+06	2.89474	4.36842	6.73684	4.63158	7.84211	10.4737	45	19.1579	18.9474	38.1389	19.9932
293	3.93755e+06	2.28571	4.35714	6.85714	3.64286	6.57143	6.92857	34.5714	17	16.2857	37.5133	20.0008
1119	2.30229e+06	1.90426	6.15957	5.47872	6.88298	11.7872	0.829787	36.6809	19.2128	3.43617	39.2171	20.0278
1253	2.41299e+06	4.42857	6.28571	6.71429	6.14286	12.7143	2	35.5714	19.1429	2.85714	37.0143	20.0613
857	4.90197e+06	3.02941	6.58824	9.05882	4.38235	8.85294	4.79412	36.7941	25.8529	18.0882	38.7026	20.1912
1334	3.23507e+06	5	4.2	8.4	5.2	8.4	16.8	48.6	19	10.8	53.1978	20.2217
577	3.01793e+06	2.04	8	7.64	7.44	13.56	2.64	39.96	21.56	4.6	37.4351	20.2793
1046	3.56811e+06	2.6	5.4	8.2	6.6	10.3	8.1	38.2	18.9	8.9	36.0218	20.3489
1295	3.34859e+06	7.90909	4.09091	7	5.45455	12	8.18182	59.2727	20.1818	2.09091	45.0979	20.3606
970	5.23458e+06	4.36364	5.09091	6.63636	4.09091	6.90909	8.81818	40	19.4545	20.0909	39.1834	20.4174
1324	4.86092e+06	7.36364	5.09091	7.90909	5	11.2727	20.3636	61.6364	22.0909	16.6364	46.2985	20.4376
627	3.78604e+06	4.22222	5.22222	6.44444	6.88889	11.8889	4.77778	48.8889	21.4444	2.88889	40.1161	20.4591
616	4.31837e+06	3.51852	5.96296	8.51852	2.51852	8.77778	6.11111	41.963	23.7778	9.11111	36.5782	20.5069
486	2.04782e+06	3.85714	5.71429	7.85714	6.71429	9.28571	1.71429	44.8571	18.8571	3.57143	37.8797	20.5946
473	4049710	3.4	5.2	6.8	2.8	5.7	6.2	35.2	19.8	12.5	35.0118	20.6179
1325	2.406e+06	5	3.625	7	0.375	4	12.625	38.75	15.25	8.75	43.8295	20.6921
1303	2.82388e+06	5.75	5.5	8.75	4.375	10.125	15	64.375	18	3.375	49.2467	20.7524
592	2.0287e+06	3.11111	4.11111	6.55556	4.66667	7	5.33333	29.2222	11.1111	6.77778	39.7787	20.8204
1322	2.64475e+06	3.66667	4.11111	7.22222	6	11.6667	4.55556	48.4444	19.8889	3.88889	42.6181	20.8206
517	856261	2	1.83333	5.5	3.83333	3.83333	2.83333	17.8333	9	0	34.7429	20.8671
1070	6.89471e+06	6.8	11.7	9.95	4.35	10.6	10.55	64.7	27.2	6.4	30.206	20.9099
420	5.48936e+06	7.65714	6.17143	8.65714	6.97143	13.4	4.94286	66.9429	23.4571	5.05714	37.6118	20.9589
418	5.06593e+06	7.4	5.73333	8.5	6.93333	12.8333	4.6	64.9	22.9	4.4	38.4878	20.9952
1283	2.53308e+06	7.16667	4.16667	6.66667	4.5	13.3333	5.5	62.1667	18	1.83333	38.1041	21.2091
1044	3.74712e+06	4.26087	4.78261	7.95652	6.43478	12.6522	7.43478	58.2174	18.3913	3.30435	43.6555	21.3093
597	4.12658e+06	4.04167	4.875	7.79167	8.20833	12.8333	3.58333	44.25	19.125	4.875	44.1239	21.3321
1310	3.19412e+06	6.15	3.9	7.55	5.5	11.35	3.85	53.2	22.5	2.9	41.8838	21.434
475	2.82358e+06	4.66667	5.19048	7.80952	5.57143	9.14286	2.95238	46.381	17.6667	3.66667	42.5685	21.4927
954	3859898	7	7	10	1	6	3	43	21	5	41.0775	21.8024
948	1578078	0	1.33333	3.66667	2.66667	5	3	17.3333	11.3333	3.66667	46.6502	22.0385
317	2.60622e+06	2.35294	6.23529	6.91176	6.35294	12.7941	3.08824	40.4118	20.8529	4.73529	39.2429	22.1607
1289	2.80426e+06	3.44444	5.11111	9.33333	0.888889	4.44444	14.5556	42.8889	18.5556	11.3333	42.2692	22.7649
941	3.37978e+06	2.44444	3.77778	5.66667	5.11111	9.22222	7.66667	35.7778	14.8889	11	45.699	22.7976
585	2068383	2	1.79412	5.88235	0.0882353	3.58824	1.11765	27.5882	13.7647	4.38235	44.8415	22.8851
470	3.72688e+06	2.33333	7.33333	7.5	3.41667	8.33333	3.33333	34.5	25.0833	14.4167	37.8444	23.4274
1292	2.55177e+06	3.8	3.9	7.2	6.9	13	4.8	44.3	19.1	3	46.5008	23.7874
1279	3.78871e+06	4.72727	3.63636	7.54545	0.818182	6.72727	20.4545	62.1818	22.7273	7.90909	42.5927	24.0015
590	1.89341e+06	4.54545	4.81818	9.09091	1.63636	4.36364	1.36364	33.9091	17.3636	2.81818	41.7293	24.5047
320	2.33226e+06	1.7931	5.55172	7.24138	5.86207	10.3103	1.2069	36.2759	19.3793	3.96552	39.314	24.8957
997	2.5378e+06	6.75	4.125	6.125	0.875	7	3.375	37.5	17.125	5.875	40.2595	25.5326
363	2.26892e+06	2.59375	4.3125	7.78125	1.375	4.78125	1.3125	28.25	17.0312	5.8125	48.0947	27.2941
856	5.28716e+06	3	5.54167	8.70833	5.95833	11.5833	4.45833	30.9167	24.2917	18.0417	38.9928	28.6549
1282	3.23648e+06	2.14286	8.57143	9.85714	7.42857	17.4286	2	51.1429	21.8571	1.85714	35.9088	30.435
