# Supplementary material for: Y-A+S is the new Y-A-S: Updating microbial life history tradeoffs with comparative genomics
Source: Research Square preprint supplement (doi:10.21203/rs.3.rs-6486618/v1), 2025-05-02
Supplement: Supplementary file 29 [file Table_S21.xlsx]

## Sheet: MAG_gen_trait
guild	genome.size	amino.transport	pH	temp	biofilm	osmolyte	GH.trasnport	tranport.total	Protein	CAZy	ogt	mgt
1020	2.60091e+06	6.44444	8.66667	6.77778	4.55556	6.11111	7	50.6667	19.3333	7.44444	40.4175	3.49638
1028	8.83291e+06	11.5385	14.4615	9.07692	0.846154	14	42.6154	115.538	33.9231	25.0769	28.2339	0.811138
1031	2.77359e+06	2.66667	6.33333	8	2.33333	7.33333	1.33333	33.6667	22.3333	5.66667	32.0219	2.28465
1036	751339	0	1.38235	5.70588	0	0.970588	0	3.02941	10.8824	3.97059	29.9724	2.93236
1053	7.84522e+06	10	14.8	9.8	0.6	12.2	31.6	95	30.6	13.2	30.6458	1.22029
1079	2.18826e+06	2.68966	6.51724	7.03448	10.6552	13.5172	1.48276	46.3448	18.7241	3.96552	32.9767	2.45022
1081	1.78689e+06	0.0454545	7.86364	6.27273	6.90909	10.8182	2.5	36.4091	18.1364	1.86364	28.6161	1.98721
1083	5.55889e+06	7.16667	11.4444	7.72222	0.0555556	7.77778	33.8889	78.8333	22.8889	23.3889	30.8198	0.950278
1096	3.08445e+06	4.58333	5.83333	6.66667	1.08333	5.58333	4.5	35	16.25	8.33333	36.8639	3.778
1098	2674552	9.125	5.25	7.5	0.875	5.5	15.5	68	21.375	6.625	30.7918	0.287241
1101	5.23953e+06	9	12	8	8.85714	20.2857	12.8571	109.714	30.2857	6.71429	32.1692	0.999242
1114	7.27417e+06	9	13.6667	7.33333	0.666667	11	26.3333	85	32	17.3333	30.9741	3.14347
1120	4.07531e+06	2.84615	5.07692	7.46154	3.69231	7.30769	4.46154	29.8462	20.4615	19	32.1815	1.78612
1122	7.62647e+06	11.5556	12.8889	9	0.888889	12.5556	40.8889	114.667	31.6667	21	29.7726	0.967907
1123	2.86442e+06	11.6	8.8	9.6	0.4	9.2	19.2	94.8	28.4	7.6	33.219	0.533913
1124	4.34306e+06	7	5.25	7.25	0.625	7.25	29.25	83.75	22.625	20.5	34.1612	3.78229
1129	4.39891e+06	6.42308	8.03846	8	1.26923	11.3846	27.6538	78.1538	22.3846	22.4615	35.3046	2.88354
1131	1.76162e+06	1.66667	3.66667	5.16667	5.83333	12.6667	3.5	35.6667	19.3333	3.83333	37.7767	2.7703
1133	2.78648e+06	3.875	7.5	5.25	5	6.875	14.75	59	13.25	17.25	36.1392	2.49405
1134	3.49428e+06	3.18182	11.7273	8.45455	8.90909	16.5455	6.54545	47.3636	26.1818	10.2727	32.1754	3.91203
1136	2.29411e+06	4.5	4.5	3.83333	0.166667	4.83333	12	44	17.3333	10.3333	36.6166	1.35555
1137	4.13456e+06	9.14286	6.38095	8.80952	0	7.47619	19.2857	80.4286	30.1429	14.6667	34.6134	1.95141
1141	2.22543e+06	2	7.8	4.8	3.4	8.2	3.6	32	16.8	7.6	28.2779	1.16479
1145	2202329	2	4.71429	6.85714	0.285714	5.85714	14.2857	43.1429	14.7143	12.2857	33.6818	3.74848
1147	2.80461e+06	6.14286	4.85714	6.42857	0.571429	6.42857	8.71429	48.2857	18	7	34.7455	2.1156
1149	2.35904e+06	1.94118	6.88235	5.88235	4.94118	9.82353	3.70588	34.3529	20.6471	7.64706	32.7957	2.32586
1154	2.2937e+06	2.77778	8.66667	7.22222	7.33333	12.4444	1.88889	30.7778	22.5556	5.11111	31.6598	3.27922
1160	2.7609e+06	4.62069	8.51724	8.13793	7.41379	12.3448	1.13793	39.5862	21.7241	2.72414	31.0548	2.37039
1166	3529765	6	9	8	6	13	8	88	20	13	34.6697	1.01179
1181	820487	0	0	4.6	0	0.8	0	3.8	10.6	4.4	37.8336	4.32049
1187	1.62705e+06	3.75	3.02632	7.59211	0.947368	9.63158	12.8947	39.0263	17.6053	3.43421	26.9594	2.1813
1189	3.5831e+06	2.96774	5.35484	8.16129	6.16129	11.5806	3.93548	38.4516	26.5161	21.0323	26.8817	1.22009
1196	2.0391e+06	4.58333	3.66667	8.25	1	11.3333	12.3333	41.25	19.5	4.04167	28.0699	2.6839
1198	688487	0	1.46154	5.30769	0	0.846154	0	1.84615	9.46154	1.92308	33.6449	2.26475
1202	4.22478e+06	2.95455	9.54545	8.5	5.45455	8.40909	3.54545	31.9545	24.2273	19.3182	31.6443	3.82834
1204	3.52754e+06	5.44444	4.11111	7.11111	1.11111	6	8	36.5556	22.2222	5	38.3887	2.33064
1208	2.04954e+06	5.5	5.66667	7	0	5.33333	12.1667	45.5	14.1667	4.66667	37.0653	2.10576
1210	3.57502e+06	2.55556	9.11111	8.33333	8.66667	13.8889	3.66667	40	22.2222	12.3333	25.6575	3.15973
1211	926425	0	1.88235	4.47059	0.823529	0.823529	0	3.64706	9.47059	3.64706	27.3672	3.18625
1215	813159	0	1.81818	2.27273	0	0	0	2.54545	7.18182	1	31.341	2.44549
1216	564644	2.16667	0.5	2.5	0.5	2.33333	2.33333	13.3333	7.5	1	25.8299	1.27495
1220	2.10727e+06	8.83333	4.66667	6.33333	1.16667	7.66667	21.3333	59	13.8333	7.66667	32.2303	2.2186
1223	3.02549e+06	5.44444	9.66667	7	7.44444	13.5556	9.77778	79.2222	20.3333	2.88889	31.1295	2.84103
1224	4.62845e+06	6.94118	16.5882	10.3529	8.76471	17.4706	26.7059	87.1765	25.7647	10.6471	26.1867	2.25046
1229	2.36435e+06	6.30769	4.38462	7.15385	0.769231	6.38462	14.0769	57.6923	20	5.15385	32.3561	1.14319
1232	4.73758e+06	5.30769	5.46154	5.92308	8.30769	11.1538	10.3846	56.7692	21.0769	13	30.6649	1.689
1235	828878	4	1	1.75	0	2.5	0.25	12.75	9.75	0.5	32.1758	2.16183
1239	2810687	6.44444	6	8.22222	2.66667	14.6667	20.2222	61.5556	18.5556	8.88889	30.392	2.3774
1240	4.60895e+06	7.625	6.5	8.25	9.5	15.375	18.125	92.5	33.25	13	28.3936	0.476873
1242	2.84966e+06	4.5	5.66667	7	7.16667	10.9167	11.25	45.9167	18.25	9.16667	36.1574	1.57866
1243	3.4138e+06	5.92308	5.61538	7.76923	5.15385	10.3077	2.69231	36.3846	24.9231	7.07692	26.3029	2.07632
1244	1.05328e+06	2.33333	3.33333	4	0	7	7.33333	29.6667	10.6667	1.33333	26.3657	1.86525
1245	2.79985e+06	5.75	5	7.5	2	8.5	6	35.5	12.5	6	33.5585	2.16838
1246	857489	1	1	3.6	0	1	0	5.2	9	1	26.7595	0.592882
1278	1.80412e+06	0.6	5.4	7.6	3.4	7.4	2	31.6	15.6	2	39.6595	1.51766
1341	2301819	2	8	10	7	15	3	44	23	4	32.5764	3.66862
1342	1.89938e+06	5.1	4.4	5.2	0.2	4.4	10.7	41.1	13.5	6.9	42.591	3.98531
14	5697058	8.63636	9.90909	7.45455	0.181818	7.81818	11.1818	75.3636	20.6364	6.18182	32.769	1.88572
174	4162597	10	14	9	9	16	10	101	26	7	27.5438	3.22223
196	7.11105e+06	11.75	13.9643	9.64286	10.5357	23.1786	30.8571	130.429	26.7143	8.92857	26.1776	2.36716
204	5.89663e+06	14.1	14.9	8.2	12.7	26.8	25.4	140.4	31	7.5	28.9078	0.669213
214	4161409	5.73077	7.65385	6.11538	7.5	11	12.6923	62.7692	17.3846	18.1538	32.9836	2.3515
289	2.86696e+06	7.125	5.75	7.625	0.875	3.875	22.625	74.875	20	11.25	36.3168	1.9402
296	3.03355e+06	8.83333	9.16667	8.33333	7.16667	14.1667	19.1667	93	28.8333	8.66667	31.1356	0.271224
301	512363	0	0.625	2.375	0	0.6875	0	0.625	8.4375	1.625	35.7583	2.67033
309	6.59626e+06	10.0909	11.1818	8.63636	2.18182	11.3636	18	103.455	28.6364	8.27273	24.755	1.15539
382	3.23237e+06	9.66667	7.5	7.58333	6.58333	15.5	6.33333	80.5	23	2.91667	31.2007	0.812595
383	4.41159e+06	19.7907	14.1163	8.83721	15.0233	27.814	40.5581	167.953	36.7442	12.4419	30.358	0.287444
391	822810	0	0	2.66667	0	1.06667	0.0666667	2.06667	10.2	3.4	35.777	1.58945
405	2.92814e+06	12.8333	8.83333	9.75	0.916667	6.33333	15.0833	73.5	26.9167	6.83333	41.3278	0.948892
413	2.90071e+06	3.46667	7.46667	6.13333	7.53333	10.4667	8.2	49.5333	13.8667	13.8	34.8825	1.81884
474	5.94556e+06	9.3375	11.95	8.7875	9.775	16.9125	24.1	107.825	33.075	16.7125	27.0688	0.399645
500	5.36518e+06	8	7.3125	7.625	0.5625	8.875	28.3125	83.625	28.6875	19.5	35.3031	2.42026
522	2128545	9	5	5	0	6	16	80	23	6	38.4384	4.29858
525	3893599	3.33333	4	7.66667	4	5	9.66667	44	17	6	33.5999	3.30753
557	2.67057e+06	14	8	9.5	1	8.5	14.5	79.5	30	4.5	35.6973	0.25843
563	2.33609e+06	3.33333	6.08333	7.5	4.16667	7.5	3.16667	35.1667	19.9167	3	33.8726	1.45623
567	4806539	3.16667	12.3333	8.5	2.33333	5	5	43.1667	17.1667	17.8333	27.8333	3.84568
575	4.83317e+06	18.4762	12.3333	8.52381	7.57143	21.7619	35.9048	163.095	39.619	12.4286	30.0946	0.452229
662	3.25776e+06	2.27273	6.90909	7.63636	4	9.27273	3.63636	34.6364	23.6364	15	30.2746	1.30103
664	4.00409e+06	8.33333	9.5	7.66667	0.333333	10	27	96.3333	23.8333	10.8333	28.4975	0.89666
703	3.18171e+06	5.73684	5.10526	7.31579	0.947368	7.63158	28.1579	78.8421	19.2632	19.0526	42.1936	1.56333
704	3.04212e+06	5.73333	9.93333	8.6	9.2	18	14.5333	70.8	26.2	13.8667	37.5825	4.54583
705	4.5553e+06	7.8	8.6	6.8	2	14.6	34.6	91.6	23.4	19	41.6366	2.0508
706	5.93757e+06	13.1818	11	9.54545	9.68182	22.2727	15.4545	134.591	30.5909	4.5	31.1741	1.0265
707	5.61929e+06	15.5625	17.25	9.1875	10.875	25.75	15.375	135.938	29.6875	6.9375	29.9568	0.54224
708	3.99686e+06	9.5	15	8.25	12	24.75	26.25	118.25	28.25	6.25	26.8422	1.72742
709	6.13821e+06	7.75	9.75	9.625	2.625	11.875	30.625	103.125	30.375	20.75	33.2378	0.762927
710	4.62727e+06	4.09524	10.7143	9.7619	10.381	19.1429	8.95238	59	25.619	14.9524	23.9838	1.3493
712	4355255	3.75	11.35	8.5	8.6	16.85	10.2	62.6	22.85	14.8	27.2915	2.05121
718	4.23148e+06	14.5	12	10.5	0.5	10.5	18.5	96	31.5	8	34.9181	0.481427
726	4.46648e+06	17	13.3333	10.5	0.333333	10.6667	25.3333	116	33.8333	9.66667	32.1882	0.334771
729	4.85498e+06	9.89474	9.47368	5.89474	8.60526	19.7105	26.1053	106.263	22	8.10526	31.005	1.65221
776	3.70329e+06	5.97059	7.61765	7.64706	3.91176	6.94118	5.97059	45.2941	23.3235	4.35294	25.8775	1.87302
777	3770995	3.4	3.8	7.4	3.4	7.6	3.4	30	21.8	14.6	26.0034	3.77563
785	2.94445e+06	5.3	5.125	7.6	1.025	12.475	24.825	70.15	17.825	10.15	28.9964	2.27376
802	5046322	18	16	10	7	22	49	191	40	14	29.715	0.0791866
803	3.59461e+06	13.3	10	9.7	3.6	11.4	19.1	99.4	33.3	7.9	41.6633	0.37125
809	3.74277e+06	10.8889	11.2222	8.11111	8.44444	15.8889	16.4444	98.3333	25.1111	5.11111	30.1984	0.824368
826	3.42791e+06	13.5	9.25	9	0	8.25	31.75	110.25	35	14.25	35.3309	0.156478
827	2.57172e+06	1.9	5.1	8.1	4.3	7.6	2.6	29.6	19.9	9.9	29.9695	2.22853
828	3575388	9.5	8	9	1	11	18	92.5	29.5	11.5	35.6268	0.539013
835	5815050	13.5	13	9	1.5	11.5	34	128.5	32.5	18	30.6838	0.512476
837	2.47612e+06	2.57143	6.57143	5.85714	3.71429	6.57143	1.71429	29.8571	16.1429	9.28571	30.4462	2.40953
840	1817527	1.66667	2.33333	3.66667	3.66667	7	7.66667	28.3333	6.33333	8.66667	39.263	3.90225
845	4220091	13.8333	15.3333	8.66667	7	16.8333	29.8333	125.833	29.5	9.5	30.365	1.37
846	3.77349e+06	9.25	7.25	8.625	1.625	5.5	30	96.25	20.5	14.125	34.3532	0.647222
851	1129673	2.66667	0.666667	3.33333	0	0	5	15.6667	8.33333	8.33333	34.7463	3.92599
854	3.69117e+06	1.75	5.25	7.625	5.375	8.625	1.125	24	25.375	7.375	27.3577	1.65194
865	3.45452e+06	3.14286	4.14286	6.71429	6.28571	8.71429	3.28571	34.5714	17.4286	20.8571	23.978	1.739
876	7253285	13	17	12	9	24	30	134	35	14	27.7167	1.02904
885	3.75926e+06	2.9375	9.09375	9.125	11.5938	20.4688	3.5	44.875	23.3438	11.625	26.8714	1.49734
887	975972	0	0.916667	4.41667	0	1.79167	0	3.33333	10.2917	2.33333	31.6067	3.51033
896	2060264	11	2	7	0	8	12	65	17	2	31.3411	0.60995
899	3.69359e+06	6.66667	11.3333	10.5	8.66667	14.3333	8.33333	71.6667	32	11.3333	33.6224	0.439121
915	1558403	3.6	4	3.2	4.4	7.2	4.4	24	7.4	9.4	29.1233	2.33326
920	2.18908e+06	6	5.18182	7.09091	3.90909	9	2.27273	58.5455	17.4545	2.54545	32.597	0.941123
929	828342	0	0	4.73077	0	1.03846	0.923077	4.57692	9.46154	1.03846	34.8716	2.84702
938	678924	0	1.7	5.2	0	1.7	0	2.5	8.3	1.7	32.0364	2.00878
976	5575037	4.66667	10	9.33333	7	14	6	52	31	20.3333	36.8546	1.88217
982	7.47471e+06	10.125	11.125	7.75	2.5	12.5	29.25	97.125	29.75	22.375	31.7656	2.64681
984	1.33464e+06	0	2	4.66667	1	1	0	8.66667	9	2.66667	42.824	3.1241
985	3.06269e+06	7.66667	8.66667	10.3333	1.33333	5.66667	23.3333	77.3333	19.3333	5	36.9682	4.30008
987	3751836	13.5	6.5	7	1	7.5	22	101.5	31	6.5	33.6981	0.184394
