# Supplementary material for: Y-A+S is the new Y-A-S: Updating microbial life history tradeoffs with comparative genomics
Source: Research Square preprint supplement (doi:10.21203/rs.3.rs-6486618/v1), 2025-05-02
Supplement: Supplementary file 33 [file Table_S22.xlsx]

## Sheet: ISO_gen_trait.1
guild	genome.size	amino.transport	pH	temp	biofilm	osmolyte	GH.trasnport	tranport.total	Protein	CAZy	yield	MGT	OGT
1357	3730792	10.069	8.96552	9.93103	0	10.1379	31.8276	120	37.1724	14.3793	0.799921	0.204915	31.0252
802	5.68625e+06	18.7059	16.5294	10	8.88235	24.4118	50.5294	193	40.2353	13	0.747723	0.239146	28.9879
1351	5.56643e+06	12.6279	10.6512	11	1.51163	14.0465	18.814	96.0465	34.2558	8.76744	0.817325	0.305178	34.0835
91	3.79874e+06	5.25	9.25	9	4.5	8.5	8.25	51.75	29.25	5	0.799701	0.368976	29.9952
259	6371112	2.33333	11	9	7	17	8	52.3333	26.6667	19	0.731848	0.396334	28.7631
227	4.87972e+06	19	12.8	10	9	24.4	42.4	175.2	40	10.8	0.739025	0.427886	28.0062
1278	2209279	1	6	10	4	8	2	39	17	2	0.815298	0.566758	36.5541
846	6383701	13	9	10	1	7	37	123	24	15	0.641596	0.581837	32.3711
242	4.3714e+06	1.26667	8.2	9	3.86667	9.33333	6.66667	40.1333	25.4	13.2667	0.776832	0.642829	27.8518
256	2.71656e+06	9.27778	6.27778	9.27778	0.277778	7.16667	20.9444	76.5556	22.7222	9.33333	0.764898	0.657401	32.6324
532	3851869	5	7	10	7	12	2	65	27	7	0.746019	0.667115	32.0466
575	5.06698e+06	17.7727	13.1364	10	8.59091	22.8182	34.9091	163.136	40.9545	11.9545	0.676231	0.710742	29.2087
899	3.96305e+06	1.9375	13.125	10.375	8.375	15.75	6.125	68.5	34	8.4375	0.794472	0.759124	30.3873
192	3787551	7	12	11	10	17	10	85	23	6	0.740004	0.829028	35.6074
1356	7.56635e+06	18.9718	16.2019	11.2958	11.507	25.3897	26.6432	133.629	34.7418	10.4131	0.802208	0.872712	27.8142
258	6.03266e+06	12.6667	16	11.1111	8.33333	19.6667	12.8889	126.444	31.2222	3.33333	0.733253	0.89506	27.1307
522	2.68988e+06	7.57143	8.28571	10	0.714286	9.85714	16.1429	87.4286	25.1429	5.42857	0.779338	0.896776	34.6485
809	4.30853e+06	12.5714	10.7143	11	8.92857	16.7143	22.2857	106.357	29	8.71429	0.777959	0.917488	32.0953
1364	5.26477e+06	12.6154	12.1538	10	7.69231	16.7692	22.4615	117.385	31.2308	9.46154	0.81335	0.941512	28.6093
876	7.60151e+06	18.1643	16.5749	11.715	10.0821	24.8019	26.7633	135.314	34.3188	11.4783	0.786588	0.951276	27.348
201	6.63196e+06	15	17	10	14	28.3333	25.6667	151.667	32.3333	8	0.684162	1.0199	27.4767
294	4847594	8	10	10	2	7	26	88	26	23	0.575891	1.03511	33.4951
1083	8.7845e+06	7.5	15	10	0.5	10.5	39.5	105.5	31.5	26	0.763184	1.06127	26.0922
309	6.92911e+06	11.9444	11	9	2.33333	11.8333	17.8333	103.444	28.3333	8.88889	0.733478	1.06417	24.3516
187	5.37309e+06	7.80952	11.7619	10.9048	10.5238	17.9524	15.619	96.4762	37.4762	13.381	0.754786	1.08706	29.9831
264	4.51366e+06	4.2	11.4	10	8.6	15.4	12.2	80.8	21.2	20.2	0.683871	1.12632	31.5984
827	2.83669e+06	1.28571	6.42857	8.85714	3.71429	7.28571	3.28571	31.7143	23.7143	7.57143	0.760141	1.13277	31.8771
239	3.4506e+06	0.75	6.55	8.95	5.25	9.4	2.15	30.25	25.25	9.65	0.772725	1.13848	29.8638
712	5.90418e+06	2.75	12.375	10.75	9.625	19.125	11.5	69.125	24.625	15.75	0.76817	1.17024	23.9882
1352	2.89792e+06	7.09091	7.87879	10	0.181818	8.06061	20.8182	81.6364	25.7879	9.54545	0.793254	1.21982	31.9644
189	5.20792e+06	12.4286	13.8571	11	9.85714	22.2857	24.7143	120.714	32.4286	6.71429	0.769551	1.23217	26.3604
100	6896904	8.5	9.625	10	2.375	11.875	19.5	87.375	29.125	19.125	0.721037	1.2447	31.4195
270	3.74071e+06	7.42424	8.09091	8.9697	0.424242	12.3939	35	104.697	24.303	9	0.799145	1.27447	32.2736
14	7.55815e+06	8.77778	14.1944	9.80556	1.13889	11.1944	13.6389	86.8056	27.1111	7.91667	0.778765	1.27457	30.3133
1166	4.97479e+06	7.5	16	10	9.125	16.375	9	101.875	31.25	13.5	0.731112	1.33074	32.6205
221	3327947	9	7	8	0	13	40	98	18	17	0.812715	1.34536	31.9839
854	4.01614e+06	0.5	6	9	6	10.5	1	30.5	24.5	6	0.812758	1.37359	27.1118
218	7022526	6.5	8.25	8	4.75	10.5	9	63.25	16.5	15.75	0.744817	1.38199	22.4135
885	4.22451e+06	1.4	10	11	12	21.2	4.4	54.8	24.2	11.2	0.762653	1.40352	26.6804
82	5.23627e+06	2.07692	5.61538	9	9.07692	14.1538	7.07692	40.3846	24.0769	20.3077	0.762262	1.41829	33.0088
710	5.04703e+06	3.04545	13.2727	10.7273	11.2727	20.7727	7.54545	60.9545	26.7727	14	0.728523	1.48806	24.8023
715	3591784	2	11	11	10	18	6	60	33	9	0.812764	1.5119	26.7078
223	4.03198e+06	10.4483	6.68966	8.65517	0.655172	12.2414	25.5172	101.828	25.2414	8.31034	0.773211	1.55318	28.3327
680	4489143	6.33333	12.5	11.1667	9.83333	15.8333	3	82.8333	27.8333	3.5	0.798049	1.55409	30.6184
662	3.89724e+06	1.6	7	9	6.1	12.8	3.7	38.8	25.8	15	0.812434	1.65715	26.0486
154	4404015	1.33333	12	11	8	18.6667	12.6667	65	25.3333	20.3333	0.782329	1.66227	28.2647
191	3257427	4	4	5	0	8	10	47	20	6	0.812395	1.69095	33.3896
1348	5.24308e+06	7.65625	12.5938	9.8125	2.375	13.5625	10.4062	78.875	26.4062	7.34375	0.703953	1.70794	30.8932
112	12191466	4	16	10	2	8	10	60	27	16	0.607543	1.71693	19.0318
576	7.57046e+06	1.45714	9.77143	8.88571	6.71429	13.9143	6.74286	40.4571	29.7429	21.2	0.767606	1.75889	31.4026
74	4.13494e+06	0.666667	7.33333	9	6.66667	9.66667	2.33333	27.6667	23.6667	5	0.784581	1.78136	32.822
541	2.73841e+06	1.66667	10	10.3333	10.3333	15.6667	1.66667	54.3333	24	5.66667	0.790326	1.87428	33.5799
845	5661159	17	13	10	10	24	36	156	38	11	0.811534	1.93023	29.3565
506	3216476	1.5	12	11	8	14	1	46.5	26	3	0.813173	2.01783	32.6913
69	4237518	1.5	7.25	8.75	6.5	10.75	2.75	33.75	26.25	15.25	0.754469	2.08834	29.6179
1137	4913910	9	6	8	1	9	21	83	33	16	0.811452	2.10219	33.2352
785	3477829	3	6	9	1	14	28	75	22	14	0.811599	2.11418	27.7714
920	2.53665e+06	6.6	6.8	10	5	10.8	2.2	64	22	3	0.724713	2.1277	32.1845
384	8.04288e+06	3.33333	17	11	9.33333	22	22.6667	99.3333	38.6667	20	0.808818	2.19388	27.4968
714	5.49993e+06	7.5	14	10.5	10.5	19	15	91	33.5	19	0.767498	2.19967	28.231
193	4.66121e+06	7.58333	13.4167	10.9167	10.9167	19	9.66667	88.3333	27.0833	6.08333	0.738484	2.21017	28.4166
729	6.77743e+06	11.3333	14.5	10.8333	11	23.5	28.1667	115.5	28	10.6667	0.780809	2.21018	27.6561
165	3.68707e+06	10.8	14.6	11	8.6	20.4	30	110.2	26	11.2	0.783459	2.24146	28.2175
917	3457374	1	5	8	4	8	5	34	20	17	0.811608	2.24979	28.5872
289	3341569	10	7.5	10	3.5	9.75	22.5	87.75	22.25	9.5	0.706448	2.29029	39.2669
1360	4.10588e+06	13.8438	10	10	1.8125	6.75	16.4375	85.4062	26.875	7	0.781579	2.32552	40.6733
185	6.07807e+06	8.88889	12.7778	11	10.3333	19.2222	9.88889	101.778	29.5556	7.44444	0.772662	2.34287	28.3535
253	4.91553e+06	2.42857	7.42857	9	6.42857	13.9286	7.42857	50.3571	24.2857	16.2857	0.779061	2.36506	31.4851
738	4127237	3	7	9	3	8	6	55	20	4	0.721188	2.40155	30.5485
1353	4.26696e+06	0.419355	8.58065	11.7097	4.22581	8.25806	2.32258	34.6129	19.6452	6.70968	0.798635	2.40401	32.3102
153	5.16614e+06	3.5	12.5	11	10.5	20.5	10	81	27	19.5	0.71862	2.40592	27.9511
214	5957605	9	10	8	10	14	13	74	26	24	0.809956	2.4212	33.2837
727	5.66877e+06	9.42857	16.5714	11.1429	10.2857	22.2857	22.2857	118.571	33.2857	6.57143	0.764822	2.43379	30.1156
68	5.57404e+06	1.14815	6.11111	8.66667	5.85185	11.0741	7.07407	37.1481	26.1852	20.037	0.748269	2.44374	31.4175
203	3.17011e+06	6.25	5.375	8.375	1	11.125	26.125	78.875	20.25	11.125	0.77866	2.45853	35.2603
222	4.41002e+06	7.25	7.41667	8.5	0.416667	10.25	27.1667	92.4167	27.75	11.25	0.788529	2.46827	33.9523
83	5387673	2	7.66667	9	9	14	9	46	25.6667	24.3333	0.779346	2.47192	32.7677
252	4438227	4.5	12.7727	10.7273	8.86364	21.9091	12.1818	81.8182	32.2273	8.72727	0.758003	2.48189	30.3895
705	4.24371e+06	5.66667	10	8.77778	0.444444	13	36.1111	94.4444	23.1111	13.7778	0.750848	2.4927	40.8261
494	3371468	1	6.33333	8.66667	6.33333	10	0.666667	27.3333	26	8.33333	0.705055	2.49338	27.4979
186	4.17366e+06	7.84615	9.15385	8.92308	0.923077	9.38462	35.4615	97.9231	23.3077	12.7692	0.788275	2.68938	33.3977
199	6.80921e+06	12.5238	16.3333	10.8571	9.38095	21.2857	21.3333	127.571	32.3333	5.19048	0.750207	2.69878	27.7732
570	4.13519e+06	4.33333	12.4444	10.1111	10	18.4444	8.66667	68.4444	32.8889	9.88889	0.768333	2.73349	32.063
535	4.66161e+06	1.6087	7.52174	9.17391	5.17391	11.8696	4.95652	41.6522	28.2174	16.1304	0.771553	2.79726	31.9918
663	2572603	1	9	10	7	10	4	54	23	3	0.720238	2.80842	34.4378
810	3532909	9	11	11	4	11	25	70	18	15	0.601647	2.90345	31.0808
240	3.9664e+06	10.45	13.45	11.05	8.45	18.85	19.8	108.3	28.35	4.95	0.708795	2.94511	27.6569
77	5.4257e+06	2	10.5	10	8.5	12	3	43	24	19	0.716834	3.01952	26.6132
1362	3.34324e+06	7	8.375	8.5	0.625	8.625	8.125	64.5	19.625	4.875	0.782256	3.01983	32.777
881	6273566	9	14	10	10	16	29	119	32	13	0.810774	3.04903	28.0509
679	5475901	5	9	9	7	11	10	68	19	5	0.810489	3.0573	29.6867
635	1.05862e+07	6.83333	12.6667	10	2.83333	13.5	32	90.8333	29.3333	26.5	0.723124	3.0736	21.2384
507	3.15106e+06	7.95652	5.56522	8.47826	0.869565	11.8696	15.087	79.2174	20.5652	4.47826	0.790642	3.1255	33.6503
262	4.8029e+06	13.2308	11.9231	10.8462	8.07692	20	9.61538	112.538	27.7692	4.23077	0.746268	3.18516	31.559
521	4.22637e+06	9	13.5714	9.78571	9.21429	19.3571	6.21429	91.2143	27.9286	3.28571	0.747358	3.20311	30.695
179	3.96115e+06	1.78788	11.2424	10.9697	9.21212	17.4242	5.21212	49.4242	26.2727	8.27273	0.786562	3.26309	26.9943
43	9.72493e+06	9.45	12.1	9.9	1.36667	14.3167	39.4333	117.983	35.9	23.2	0.754768	3.27239	30.7926
1031	3.36124e+06	5.2	7.6	9.2	3.2	10.2	3.4	45.6	28.8	5.2	0.811199	3.3244	33.1119
703	3744005	6	8	9	1	13	34	91	22	24	0.810534	3.37217	42.0398
24	7589313	4	14	10	4	10	10	52	19	8	0.8081	3.37422	28.6973
25	1.00326e+07	7.82759	12.4138	9.62069	2.55172	14.5172	37.3103	110.793	33.8621	24.1379	0.729082	3.37583	26.9398
87	4938963	7	9	10	1	7	6	59	22	10	0.810794	3.39045	31.8789
13	8.23914e+06	8.2	13.2	9.7	1	14.9	27.8	109.8	29.4	9.7	0.72582	3.42113	30.5749
175	4.41889e+06	10.1429	14.7143	11.0357	8.60714	18.6071	20.3571	104.607	30.3214	6.42857	0.7785	3.47162	26.6007
1123	3337919	9.14286	9.14286	11	0.428571	8.42857	24.2857	97.7143	34.4286	9.14286	0.684467	3.47661	39.6295
699	3.11872e+06	1.28571	9.71429	11	8.57143	16	3	41.2857	25.1429	8	0.797765	3.52287	28.9159
292	4.50958e+06	0.942857	12.9714	10.8857	8.62857	17.9143	8.94286	59.9714	30.3714	14.1714	0.77929	3.54086	31.3331
15	4847025	6	8.5	9	1.5	8.5	16	65	23	9	0.719303	3.58591	30.8819
937	4176095	7	9	12	7	12	7	82	29	6	0.810766	3.63666	30.4082
623	1.03525e+07	7.02273	14.2955	11.8409	7.38636	12	12.7955	83.9773	30.7273	14.6591	0.722719	3.68815	29.6547
668	679415	0	0	1	0	1	0	0	2	2	1	3.71112	37.7049
503	4257141	8.11111	6.44444	8.88889	1.22222	14.6667	24.4444	85.2222	28.2222	7.88889	0.748329	3.71393	35.5433
796	3.63256e+06	1.375	11.375	11	9.375	17.625	7	51	25.625	9.875	0.810513	3.7536	25.1829
35	4.14317e+06	5	5.5	8	0.5	9.5	9	56.5	24.5	6	0.81049	3.75405	30.302
62	3599693	4	10	11	6	10	9	52	22	15	0.810424	3.76266	28.0126
225	2.90426e+06	8	4.5	7.5	0.75	10.25	21.5	88	18.25	10.75	0.78788	3.78108	31.4929
790	4035195	1	6.5	9	8	13	3.5	33.5	22	19.5	0.810249	3.78374	29.0748
698	2.63171e+06	0.944444	9.33333	11	8	13	4.77778	35	28.6111	7.11111	0.800923	3.8024	30.0935
1161	4.19546e+06	0.0344828	9	10.9655	4.41379	8.06897	3.93103	36.6207	20.4483	9.10345	0.771632	3.80283	33.4129
42	8579344	8	12	9.75	1	14	33.5	103	32	22.5	0.777343	3.82428	29.3005
21	5705034	6	9	9	3	15	27	89	30	18	0.714557	3.86283	37.629
458	2934611	3	8	11	9	14	2	57	22	3	0.717767	3.86859	32.5686
18	6.57581e+06	10	13.5	10	5	17.5	24.75	105.75	27.75	10.5	0.760321	3.91916	31.6126
1341	4.01301e+06	2	9.2	11	6.6	16.2	10	66.4	30.2	7.6	0.771642	3.92864	27.7524
811	2.0459e+06	7	2	7	0	6	2	35	15	1.5	0.811012	3.97561	37.4828
245	4.16628e+06	2.79167	12.4167	10.9167	8.83333	19.3333	12.0833	70.9583	29.875	13.375	0.748382	3.98154	32.7897
985	4.32065e+06	6.33333	9.66667	11	1.5	6.41667	22.5	81.4167	25	15.25	0.612938	4.00299	36.816
489	3.34482e+06	9.4	6.4	10	3.4	9.6	18	73.2	22.6	11.8	0.744521	4.06164	39.6731
1104	4.73813e+06	2.5	11.5833	10.9167	9.33333	19.3333	10.9167	65	30.6667	13.75	0.761248	4.09873	31.1062
1349	1.01763e+07	4.82051	13.7949	11.0513	7.4359	10.5897	16.0769	80.5128	27.9231	16.5897	0.770838	4.1843	30.0813
568	7.34255e+06	2.83333	8	9.83333	4.16667	9.16667	6.16667	45.3333	27.8333	21	0.775065	4.22196	30.2234
298	7.48559e+06	7	10	8	8	12	10	68	25	9.5	0.758073	4.27167	29.8962
354	4634638	10.5	10.5	10.5	8.5	12.5	11	93.5	27.5	4	0.762793	4.27577	32.5507
886	5.7574e+06	9.08333	14.75	10.8333	10	19.4167	19.3333	113.25	30	9.58333	0.751076	4.30368	30.9482
504	5959831	6.5	12.5	10	6	8.5	6.5	61.5	30.5	10.5	0.661257	4.30802	30.2419
232	4201516	7	5	9	1	7	32	95	27	14	0.661706	4.31787	36.6824
731	4.60398e+06	1.4	13.6	11	9.6	18	7.4	57.6	29.6	10.4	0.743304	4.32809	29.0081
566	7480314	1	9	10	6	10	7	60	35	16	0.806142	4.33753	32.7171
719	3.92134e+06	0	12.8571	11	8	15.5714	9	52	31.2857	13.5714	0.809976	4.35632	31.6867
1335	4.54098e+06	1	11.25	10.75	7	14.25	4.5	55.25	25.75	8.625	0.767377	4.46027	30.7072
297	4.67355e+06	9.6	10.2	10	1.6	6.6	26.6	84.6	27.6	18	0.688591	4.52794	37.216
171	5161542	2	7.5	11	6	11.5	6.5	38.5	27.5	20	0.761999	4.53845	26.3768
291	5.94712e+06	1	6.75	8.75	7	15.75	5.25	40.25	25.75	17.75	0.729692	4.58209	33.3174
10	6845997	2.33333	10.3333	11	5.66667	10.6667	9.33333	41.6667	31.6667	24	0.808192	4.62813	26.9685
27	5.18513e+06	0.384615	7.61538	11	5.23077	10.1538	7.92308	41.9231	30.9231	19.5385	0.801861	4.63033	27.695
213	4320198	4	6	8	10	14	15	59	21	15	0.80929	4.63149	28.3047
1126	6.30955e+06	13.8515	17	10.9901	10.1188	25.0495	36.2673	133.663	32.4653	10.8713	0.775575	4.65329	25.6085
38	4.20573e+06	5.83333	6.16667	9	1.66667	11.8333	23.1667	79.6667	26	13.8333	0.809416	4.86858	36.8147
161	7.79553e+06	11.3529	15.3529	11	10.5588	20.4118	22.2647	121.382	31.9706	9	0.799728	5.06875	24.9391
229	6.11441e+06	13.25	14	11	10.125	20.125	17	110	30.625	7.25	0.785481	5.12182	26.6041
986	5.55216e+06	13.9091	15.8182	11	9.18182	22.4545	27.2727	122.909	29.3636	9.72727	0.764605	5.13006	27.462
977	5.55503e+06	13.7241	16.2069	10.931	10.7931	24.1724	30.0345	126.966	30.4138	8	0.760285	5.16238	27.4053
480	5889200	15	13	11	10	21	39	140	28	14	0.65883	5.21565	27.4026
159	5.24659e+06	7.33333	14.8333	10.6667	8.33333	17.3333	11.1667	95.6667	29.3333	7.83333	0.793238	5.27278	27.9003
195	3359775	5	6	8	1	9	20	58	22	14	0.714799	5.37447	39.1911
200	4829801	4	13.6667	11	9.33333	19	6.83333	69.3333	29.5	8.33333	0.809221	5.39163	33.0898
741	4.60724e+06	2.22222	10.5556	11	9.88889	15.6667	4.11111	56.6667	29	5.55556	0.732585	5.41677	31.5063
150	4504897	1.66667	11.3333	11.3333	7.66667	17	6.33333	56.6667	28.6667	11.3333	0.777017	5.43365	31.0142
988	4.00928e+06	4	12	11.2	9.4	18.8	4.8	65	28.4	5.6	0.809513	5.4413	30.3982
704	3.84589e+06	3	12.25	11	8.25	18.25	16	77.5	30	16	0.808908	5.45642	34.5175
9	4.78359e+06	7.61538	8.76923	8.38462	1.61538	12.1538	23.7692	88.3846	23.4615	8.53846	0.771667	5.5886	37.6332
149	4891522	1	11	11	8	17	12	67	28	14	0.80878	5.67979	29.7839
1168	6.37787e+06	9	11.5	11	8.5	20	28.5	103.5	26	8.5	0.807802	5.73832	23.6207
954	3.53263e+06	6.14286	8	10.7143	2.57143	7.42857	11	69.8571	23.7143	4.14286	0.721028	5.7516	40.3127
174	6.53431e+06	12.25	14.25	10.875	10.125	21.625	12.0625	113.75	31.25	8.625	0.701132	5.75231	26.4879
1343	6.2042e+06	8.5	7.6	8.7	2	14.8	34.5	106.6	29.8	19	0.773024	5.77531	34.0427
898	5672137	1.25	9.58333	11	5.5	11.5833	6.08333	41.5	30.5	21.75	0.783754	5.86219	27.9201
318	3.72927e+06	7	6	9	8.5	13.25	3	64	22.25	3.25	0.761753	5.96609	31.2891
967	2441318	2	7	9	4	11	3	51	22	2	0.809158	5.99092	37.6442
734	2909809	1	11	11	12	18	3	59	27	3	0.71399	6.03058	38.3612
653	2291306	4	11	11	7	12	3	64	26	3	0.809194	6.03976	35.554
51	6.06256e+06	6.28571	9.57143	9.57143	2.14286	9.57143	19.5714	80.5714	28.5714	13.1429	0.806317	6.11157	29.1289
894	6132710	10	15	11	10	23	25	111	26	7	0.807952	6.12712	29.0734
701	7562165	2.375	10.625	8.75	3.625	10.25	9.125	54.75	24	9.75	0.801741	6.14563	28.5184
543	4365425	1	7	9	6	9	2	37	27	8	0.808899	6.27201	35.4554
455	3750556	0	10	10	8	11	5	31.5	33	6	0.80881	6.32579	32.1275
1124	5.21148e+06	6.84615	5.69231	8.69231	0.153846	9.46154	31.4615	92.3077	25.3077	21.3846	0.762611	6.43363	32.4931
139	1.02881e+07	4.2	6.6	9	2.2	8.4	3.6	46	24.4	7.2	0.692729	6.44436	29.6871
628	1907588	4	7	12	6	10	2	46	21	5	0.808746	6.5206	53.6096
54	5183347	4.75	8.75	10	2.75	10.25	9	54.25	23.5	10.75	0.807783	6.54169	31.6477
529	1.77484e+06	2.33333	6	9	4.66667	8	0.666667	30	18.6667	1.33333	0.75913	6.68911	71.0085
300	3.03478e+06	10.1429	5	8.42857	2.57143	10.1429	19.4286	87.1429	30.5714	8	0.720907	6.7911	33.9045
111	1.24324e+07	5	10.7778	10.1111	2.44444	10.7778	11.5556	73.1111	30	16.3333	0.604225	6.81415	24.6236
834	3864763	3	12	11	11	19	10	53	30	10	0.808411	7.02004	30.0236
144	5.50367e+06	8.68421	12.2105	11	8.31579	17.8421	10.2632	97	27.5789	7	0.784293	7.14145	28.6843
642	5.92474e+06	10.5	13.5	11	10	23	9	104.5	30.5	6.5	0.759247	7.20408	33.7995
883	2.7454e+06	1.66667	5.66667	7.66667	8	11.3333	3.66667	33	14	8.66667	0.808093	7.30225	45.7265
188	5.02606e+06	9.53846	13.9231	10.9231	9.23077	20	9.84615	97.3846	29	7.46154	0.770538	7.63814	33.2865
1022	6.27296e+06	6.75	13	9	3.25	15	12	77	23	7.75	0.733691	7.68546	34.2521
76	4963791	0	5	9	6	11	8	40	25	26	0.80699	7.70963	31.923
237	6.10317e+06	9.66667	13.6667	11	10	17.6667	13.6667	98.3333	30.6667	8.66667	0.805675	7.76899	28.7662
266	8732077	1	8	9	7	13	9	46	30	26	0.700052	7.81213	28.7879
446	9066183	13.25	16	11	8.75	20.75	30.75	118.5	32.5	9.25	0.788574	7.87321	21.0402
347	4.57917e+06	6.8	13.4	11	9.4	19.2	11.4	78.2	26.4	6.4	0.757932	7.91409	29.3201
170	4.81767e+06	9.4	14.4	11	9.4	20.4	12.2	98.9	26.5	4.9	0.807388	7.97272	28.6025
682	4.48745e+06	8.42857	11.7143	11	10	18.8571	11	99.1429	28.7857	4.92857	0.771916	8.11774	34.6656
595	7309527	0.5	8.5	9	0.5	6.5	6	44.5	24	9	0.799807	8.36769	28.3386
376	3301051	3	7	9	11	17	2	56	21	4	0.710836	8.37542	31.4453
564	1.19339e+07	0.333333	9	9.66667	1	6.83333	5.5	51.5	29.6667	13.3333	0.633778	8.42729	24.4828
695	5.28855e+06	5.5	10.5	11	6.75	12.5	14	76.5	30.75	7.75	0.733979	8.76393	38.9203
93	2894757	6	5.5	10.5	3	7	15.5	63.5	27	11.5	0.759451	8.80589	54.3254
440	7.6302e+06	6.125	9.9375	9.125	9.1875	14.9375	12	78.125	25.375	10.625	0.696216	8.819	31.1152
2	5650368	2	10	11	4	12	9	51	34	20	0.805084	8.96404	29.9074
30	5.10059e+06	4	8.35294	9.58824	0.411765	10	6.58824	45.3529	26.7059	5.70588	0.789673	8.98329	34.8148
640	4.26098e+06	9	11.5	11	8.5	16	9.5	94.5	30	8.5	0.709636	9.34298	35.3249
694	3661677	8	6	9	8	13	2	64	22	2	0.806452	10.2754	33.7182
334	4369134	1.5	13	11	8	17	4	58	28	6	0.805594	10.3465	31.2268
145	6.87199e+06	10	11.5	11.5	8.5	18	17.5	98.5	28	6.5	0.799705	10.3523	26.8044
500	8.49542e+06	6.30769	11.6923	9.61538	0.615385	11.6923	33.6923	105.846	36.3077	23.8462	0.767648	10.4455	30.3653
349	3787465	2	8	10	5	7	10	47	27	16	0.805009	10.4772	41.2001
140	7973901	1	11	10	4	10	8	47	27	13	0.797855	10.5364	36.1575
490	4.50582e+06	2	7.33333	10	6.66667	11.3333	6	45.3333	25.6667	13.6667	0.805521	10.6198	29.1931
1016	1928597	3	4	9	8	9	0	21	23	4	0.80611	10.6786	37.9107
1344	3.71278e+06	5.4	10	10.2	1.1	8.1	20.5	69.9	27.9	10.2	0.723741	10.9396	42.1554
290	3.10622e+06	5	7.66667	10.6667	2.66667	7.33333	1.33333	44	23	4	0.691166	10.98	40.261
65	4.33481e+06	5	7	11	4.5	6.5	13	46.5	33	19	0.707461	11.2573	40.3209
299	9.11292e+06	6.25	9	10	2.25	7.5	30	86.5	31.5	19.5	0.64992	11.5396	34.8622
702	3.51436e+06	0	11	11	10.6	15.6	2	46.2	27.4	4.8	0.804993	12.0959	30.6687
1346	3.15744e+06	0	9.5	11	8.75	12.5	7	39.5	21.5	3.75	0.755456	12.5767	34.4403
216	7414222	5	6	9	5	8	12	66	27	22	0.796849	14.4495	22.6831
39	9965640	1	8	10	5	7	10	44	33	24	0.668318	15.1942	24.2921
92	6761922	6	10	10	6	11	26	79	35	25	0.796012	17.3772	34.3096
960	3655731	4	6	10	7	13	1	48	22	4	0.801013	17.3938	34.6645
