# Supplementary material for: Y-A+S is the new Y-A-S: Updating microbial life history tradeoffs with comparative genomics
Source: Research Square preprint supplement (doi:10.21203/rs.3.rs-6486618/v1), 2025-05-02
Supplement: Supplementary file 37 [file Table_S3.xlsx]

## Sheet: microtrait_proteins
microtrait_hmm-name	microtrait_hmm-description
ggt	ggt; gamma-glutamyltranspeptidase / glutathione hydrolase [EC:2.3.2.2 3.4.19.13]
pepA_M17	CARP, pepA; leucyl aminopeptidase [EC:3.4.11.1]
pepN	pepN; aminopeptidase N [EC:3.4.11.2]
pepT	pepT; tripeptide aminopeptidase [EC:3.4.11.4]
pip	pip; proline iminopeptidase [EC:3.4.11.5]
pepA_M42	pepA; glutamyl aminopeptidase [EC:3.4.11.7]
pepP	pepP; Xaa-Pro aminopeptidase [EC:3.4.11.9]
map	map; methionyl aminopeptidase [EC:3.4.11.18]
dmpA	dmpA, dap; D-aminopeptidase [EC:3.4.11.19]
pepD_M20	pepD; dipeptidase D [EC:3.4.13.-]
pepD_S1	pepD; putative serine protease PepD [EC:3.4.21.-]
pepQ	pepQ; Xaa-Pro dipeptidase [EC:3.4.13.9]
pepX	pepX; X-Pro dipeptidyl-peptidase [EC:3.4.14.11]
dcp	dcp; peptidyl-dipeptidase Dcp [EC:3.4.15.5]
cpg	cpg; glutamate carboxypeptidase [EC:3.4.17.11]
ldcA	ldcA; muramoyltetrapeptide carboxypeptidase [EC:3.4.17.13]
E3.4.17.19	E3.4.17.19; carboxypeptidase Taq [EC:3.4.17.19]
pcp	pcp; pyroglutamyl-peptidase [EC:3.4.19.3]
iadA	iadA; beta-aspartyl-dipeptidase (metallo-type) [EC:3.4.19.-]
yqgT	yqgT; g-D-glutamyl-meso-diaminopimelate peptidase [EC:3.4.19.11]
sspA	sspA; glutamyl endopeptidase [EC:3.4.21.19]
E3.4.21.50	E3.4.21.50; lysyl endopeptidase [EC:3.4.21.50]
lon	ATP-dependent Lon protease [EC:3.4.21.53]
iga_hap	iga; IgA-specific serine endopeptidase [EC:3.4.21.72]
ptrB	ptrB; oligopeptidase B [EC:3.4.21.83]
clpP	ATP-dependent Clp protease, protease subunit [EC:3.4.21.92]
iga_zmpA	iga; IgA-specific metalloendopeptidase [EC:3.4.24.13]
ptrA	ptrA; protease III [EC:3.4.24.55]
prlC	prlC; oligopeptidase A [EC:3.4.24.70]
hslV	hslV, clpQ; ATP-dependent HslUV protease, peptidase subunit HslV [EC:3.4.25.2]
bepA	bepA; beta-barrel assembly-enhancing protease [EC:3.4.-.-]
cpaA	cpaA, tadV; prepilin peptidase CpaA [EC:3.4.23.43]
hofD	hofD, hopD; leader peptidase HopD [EC:3.4.23.43]
pilD	pilD, pppA; leader peptidase (prepilin peptidase) / N-methyltransferase [EC:3.4.23.43 2.1.1.-]
lepB	lepB; signal peptidase I [EC:3.4.21.89]
lspA	lspA; signal peptidase II [EC:3.4.23.36]
psmA	psmA, prcA; proteasome alpha subunit [EC:3.4.25.1]
psmB	psmB, prcB; proteasome beta subunit [EC:3.4.25.1]
hyaD	hyaD, hybD; hydrogenase maturation protease [EC:3.4.23.-]
prc	E3.4.21.102, prc, ctpA; carboxyl-terminal processing protease [EC:3.4.21.102]
hflB	ftsH, hflB; cell division protease FtsH [EC:3.4.24.-]
lonB	ATP-dependent Lon protease [EC:3.4.21.53]
hhoB	hhoB, degS; serine protease DegS [EC:3.4.21.-]
lonH	Lon-like ATP-dependent protease [EC:3.4.21.-]
degP	degP, htrA; serine protease Do [EC:3.4.21.107]
degQ	degQ, hhoA; serine protease DegQ [EC:3.4.21.-]
sppA	sppA; protease IV [EC:3.4.21.-]
sohB	sohB; serine protease SohB [EC:3.4.21.-]
ydgD	ydgD; protease YdgD [EC:3.4.21.-]
pfpI	pfpI; protease I [EC:3.5.1.124]
E3.4.11.10	E3.4.11.10; bacterial leucyl aminopeptidase [EC:3.4.11.10]
pepE	pepE; dipeptidase E [EC:3.4.13.21]
cpt	cpt; carboxypeptidase T [EC:3.4.17.18]
gpr	gpr; spore protease [EC:3.4.24.78]
spoIIGA	spoIIGA; stage II sporulation protein GA (sporulation sigma-E factor processing peptidase) [EC:3.4.23.-]
preP	PITRM1, PreP, CYM1; presequence protease [EC:3.4.24.-]
dacC	dacC, dacA, dacD; serine-type D-Ala-D-Ala carboxypeptidase (penicillin-binding protein 5/6) [EC:3.4.16.4]
dacB	dacB; serine-type D-Ala-D-Ala carboxypeptidase/endopeptidase (penicillin-binding protein 4) [EC:3.4.16.4 3.4.21.-]
vanY	vanY; zinc D-Ala-D-Ala carboxypeptidase [EC:3.4.17.14]
mepA	mepA; penicillin-insensitive murein DD-endopeptidase [EC:3.4.24.-]
pbpG	pbpG; serine-type D-Ala-D-Ala endopeptidase (penicillin-binding protein 7) [EC:3.4.21.-]
pqqL	pqqL; zinc protease [EC:3.4.24.-]
pepO	pepO; putative endopeptidase [EC:3.4.24.-]
loiP	metalloprotease [EC:3.4.24.-]
pepB	pepB; PepB aminopeptidase [EC:3.4.11.23]
flaK	flaK; archaeal preflagellin peptidase FlaK [EC:3.4.23.52]
prtC_M10	serralysin [EC:3.4.24.40]
prtC_U32	prtC, trhP; U32 family peptidase [EC:3.4.-.-]
hycI	hycI; hydrogenase 3 maturation protease [EC:3.4.23.51]
ypdF	ypdF; aminopeptidase [EC:3.4.11.-]
pgtE	pgtE; outer membrane protease E [EC:3.4.21.-]
tpr	tpr; thiol protease [EC:3.4.22.-]
yopJ	yopJ; YopJ protease family
yopT	yopT; YopT peptidase [EC:3.4.22.-]
pepF	pepF, pepB; oligoendopeptidase F [EC:3.4.24.-]
E3.4.17.14	E3.4.17.14; zinc D-Ala-D-Ala carboxypeptidase [EC:3.4.17.14]
vanX	vanX; zinc D-Ala-D-Ala dipeptidase [EC:3.4.13.22]
lasA	lasA; LasA protease [EC:3.4.24.-]
zmpB_M26	zmpB; zinc metalloprotease ZmpB [EC:3.4.24.-]
zmpB_M4	zmpB; zinc metalloprotease ZmpB
lef	lef; anthrax lethal toxin endopeptidase [EC:3.4.24.83]
scpA	C5AP, scpA, scpB; C5a peptidase [EC:3.4.21.110]
pepDA	pepDA, pepDB; dipeptidase [EC:3.4.-.-]
tri	tri; tricorn protease [EC:3.4.21.-]
nprB	nprB; neutral peptidase B [EC:3.4.24.-]
mtfA	mtfA; MtfA peptidase
rseP	rseP; regulator of sigma E protease [EC:3.4.24.-]
cps	cps; carboxypeptidase Ss1 [EC:3.4.17.-]
iaaA	ASRGL1, iaaA; L-asparaginase / beta-aspartyl-peptidase [EC:3.5.1.1 3.4.19.5]
wprA	wprA; cell wall-associated protease [EC:3.4.21.-]
isp	isp; major intracellular serine protease [EC:3.4.21.-]
bpr	bpr; bacillopeptidase F [EC:3.4.21.-]
epr	epr; minor extracellular protease Epr [EC:3.4.21.-]
sipW	SEC11, sipW; signal peptidase I [EC:3.4.21.89]
avrRpt2	avrRpt2; cysteine protease avirulence protein AvrRpt2 [EC:3.4.22.-]
avrPphB	avrPphB; cysteine protease avirulence protein AvrPphB [EC:3.4.22.-]
icsP	icsP, sopA; outer membrane protease [EC:3.4.23.-]
mepS	mepS, spr; murein DD-endopeptidase / murein LD-carboxypeptidase [EC:3.4.-.- 3.4.17.13]
trf2_3	trf2_3; tricorn protease interacting factor F2/3 [EC:3.4.11.-]
aprE1	subtilisin [EC:3.4.21.62]
aprE2	K14645; serine protease [EC:3.4.21.-]
vpr	vpr; minor extracellular serine protease Vpr [EC:3.4.21.-]
dppA	D-amino peptidase [EC:3.4.11.-]
erfK	erfK; L,D-transpeptidase ErfK/SrfK
yydH	yydH; putative peptide zinc metalloprotease protein
cwlK	cwlK; peptidoglycan LD-endopeptidase CwlK [EC:3.4.-.-]
aprX	aprX; serine protease AprX [EC:3.4.21.-]
frvX	frvX; putative aminopeptidase FrvX [EC:3.4.11.-]
sprE	sprE; glutamyl endopeptidase II [EC:3.4.21.82]
ptpA	ptpA; Xaa-Xaa-Pro tripeptidyl-peptidase [EC:3.4.14.12]
vanXY	vanXY; zinc D-Ala-D-Ala dipeptidase/carboxypeptidase [EC:3.4.13.22 3.4.17.14]
ampH	ampH; serine-type D-Ala-D-Ala carboxypeptidase/endopeptidase [EC:3.4.16.4 3.4.21.-]
cwlS	cwlS; peptidoglycan DL-endopeptidase CwlS [EC:3.4.-.-]
lytF	lytF, cwlE; peptidoglycan DL-endopeptidase LytF [EC:3.4.-.-]
lytE	lytE, cwlF; peptidoglycan DL-endopeptidase LytE [EC:3.4.-.-]
gluP	gluP; rhomboid protease GluP [EC:3.4.21.105]
ynhG	ynhG; L,D-transpeptidase YnhG
ybiS	ybiS; L,D-transpeptidase YbiS
ycfS	ycfS; L,D-transpeptidase YcfS
mepH	mepH; murein DD-endopeptidase [EC:3.4.-.-]
mepM	mepM; murein DD-endopeptidase [EC:3.4.24.-]
mpl	mpl; zinc metalloproteinase [EC:3.4.24.-]
ampS	ampS, pepS, ampT; aminopeptidase [EC:3.4.11.-]
ywaD	ywaD; aminopeptidase YwaD [EC:3.4.11.6 3.4.11.10]
E3.4.11.24	E3.4.11.24; aminopeptidase S [EC:3.4.11.24]
zmp1	zmp1; Pro-Pro endopeptidase [EC:3.4.24.89]
alpha-LP	alpha-LP; alpha-lytic endopeptidase [EC:3.4.21.12]
zmpA	zmpA; zinc metalloprotease ZmpA
nisP	nisP, epiP; lantibiotic leader peptide-processing serine protease [EC:3.4.21.-]
tet	tet; tetrahedral aminopeptidase [EC:3.4.11.-]
sgcX	sgcX; putative aminopeptidase [EC:3.4.11.-]
ykfC	ykfC; gamma-D-glutamyl-L-lysine dipeptidyl-peptidase [EC:3.4.14.13]
E3.4.24.32	E3.4.24.32; beta-lytic metalloendopeptidase [EC:3.4.24.32]
bapA	bapA; beta-peptidyl aminopeptidase [EC:3.4.11.25]
E3.4.21.121	E3.4.21.121; Lys-Lys/Arg-Xaa endopeptidase [EC:3.4.21.121]
impA	impA; immunomodulating metalloprotease
pbp4b	pbp4b; serine-type D-Ala-D-Ala carboxypeptidase [EC:3.4.16.4]
ycbB	ycbB; L,D-transpeptidase YcbB
cwlO	cwlO; peptidoglycan DL-endopeptidase CwlO [EC:3.4.-.-]
lytH	lytH; peptidoglycan LD-endopeptidase LytH [EC:3.4.-.-]
ripA	ripA; peptidoglycan DL-endopeptidase RipA [EC:3.4.-.-]
ripB	ripB; peptidoglycan DL-endopeptidase RipB [EC:3.4.-.-]
hpxW	hpxW; oxamate amidohydrolase [EC:3.5.1.126]
E3.4.24.33	E3.4.24.33; peptidyl-Asp metalloendopeptidase [EC:3.4.24.33]
pipA	pipA, gogA, gtgA; PipA/GogA/GtgA family effector protease
tpdA	tpdA; cysteinylglycine-S-conjugate dipeptidase [EC:3.4.13.23]
prsW	prsW; protease PrsW [EC:3.4.-.-]
patG	patG; thiazoline dehydrogenase / protease [EC:1.3.3.16 3.4.-.-]
