# Supplementary material for: Y-A+S is the new Y-A-S: Updating microbial life history tradeoffs with comparative genomics
Source: Research Square preprint supplement (doi:10.21203/rs.3.rs-6486618/v1), 2025-05-02
Supplement: Supplementary file 41 [file Table_S4.xlsx]

## Sheet: microtrait_transporters
microtrait_hmm-name	class	function	microtrait_hmm-description.y
aapJ	aminoacid	transporter	general L-amino acid transport system substrate-binding protein
aapM	aminoacid	transporter	general L-amino acid transport system permease protein
aapP	aminoacid	transporter	general L-amino acid transport system ATP-binding protein [EC:3.6.3.-]
aapQ	aminoacid	transporter	general L-amino acid transport system permease protein
abgT	aminoacid	transporter	aminobenzoyl-glutamate transport protein
actP	carboxylate	transporter	cation/acetate symporter
adiC	aminoacid	transporter	arginine:agmatine antiporter
afuA	ion	transporter	iron(III) transport system substrate-binding protein
afuB	ion	transporter	iron(III) transport system permease protein
afuC	ion	transporter	iron(III) transport system ATP-binding protein [EC:3.6.3.30]
agaEIIA	carbohydrate	transporter	PTS system, N-acetylgalactosamine-specific IIA component [EC:2.7.1.69]
agaEIIB	carbohydrate	transporter	PTS system, N-acetylgalactosamine-specific IIB component [EC:2.7.1.69]
agaEIIC	carbohydrate	transporter	PTS system, N-acetylgalactosamine-specific IIC component
agaEIID	carbohydrate	transporter	PTS system, N-acetylgalactosamine-specific IID component
aglE	carbohydrate	transporter	alpha-glucoside transport system substrate-binding protein
aglF	carbohydrate	transporter	alpha-glucoside transport system permease protein
aglG	carbohydrate	transporter	alpha-glucoside transport system permease protein
aglK	carbohydrate	transporter	alpha-glucoside transport system ATP-binding protein
aguE	carboxylate	transporter	alpha-1,4-digalacturonate transport system substrate-binding protein
aguF	carboxylate	transporter	alpha-1,4-digalacturonate transport system permease protein
aguG	carboxylate	transporter	alpha-1,4-digalacturonate transport system permease protein
allP	nitrogen.compound	transporter	allantoin permease
alsA	carbohydrate	transporter	D-allose transport system ATP-binding protein [EC:3.6.3.17]
alsB	carbohydrate	transporter	D-allose transport system substrate-binding protein
alsC	carbohydrate	transporter	D-allose transport system permease protein
amiS	nitrogen.compound	transporter	amide transporter protein
amt	nitrogen.compound	transporter	ammonium transporter, Amt family
ansP	aminoacid	transporter	L-asparagine permease
aotJ	aminoacid	transporter	arginine/ornithine transport system substrate-binding protein
aotM	aminoacid	transporter	arginine/ornithine transport system permease protein
aotP	aminoacid	transporter	arginine/ornithine transport system ATP-binding protein [EC:3.6.3.-]
aotQ	aminoacid	transporter	arginine/ornithine transport system permease protein
araF	carbohydrate	transporter	L-arabinose transport system substrate-binding protein
araG	carbohydrate	transporter	L-arabinose transport system ATP-binding protein [EC:3.6.3.17]
araH	carbohydrate	transporter	L-arabinose transport system permease protein
araJ	carbohydrate	transporter	MFS transporter, DHA1 family, arabinose polymer utilization protein
araN	carbohydrate	transporter	arabinosaccharide transport system substrate-binding protein
araP	carbohydrate	transporter	arabinosaccharide transport system permease protein
araQ	carbohydrate	transporter	arabinosaccharide transport system permease protein
arcD	aminoacid	transporter	arginine:ornithine antiporter / lysine permease
arg1	aminoacid	transporter	lysine/arginine/ornithine/histidine/octopine transport system substrate-binding protein
arg2	aminoacid	transporter	lysine/arginine/ornithine/histidine/octopine transport system permease protein
arg3	aminoacid	transporter	lysine/arginine/ornithine/histidine/octopine transport system permease protein
arg4	aminoacid	transporter	lysine/arginine/ornithine/histidine/octopine transport system ATP-binding protein [EC:7.4.2.1]
argT	aminoacid	transporter	lysine/arginine/ornithine transport system substrate-binding protein
artI	aminoacid	transporter	arginine transport system substrate-binding protein
artJ	aminoacid	transporter	arginine transport system substrate-binding protein
artM	aminoacid	transporter	arginine transport system permease protein
artP1	aminoacid	transporter	arginine transport system ATP-binding protein [EC:3.6.3.-]
artP2	aminoacid	transporter	arginine/lysine/histidine transporter system substrate-binding protein
artQ1	aminoacid	transporter	arginine transport system permease protein
artQ2	aminoacid	transporter	arginine/lysine/histidine transport system permease protein
artR	aminoacid	transporter	arginine/lysine/histidine transport system ATP-binding protein [EC:7.4.2.1]
ascEIIB	carbohydrate	transporter	PTS system, arbutin-, cellobiose-, and salicin-specific IIB component [EC:2.7.1.69]
ascEIIC	carbohydrate	transporter	PTS system, arbutin-, cellobiose-, and salicin-specific IIC component
atoE	lipid	transporter	short-chain fatty acids transporter
attA1	other	transporter	mannopine transport system ATP-binding protein
attA2	other	transporter	mannopine transport system permease protein
attB	other	transporter	mannopine transport system permease protein
attC	other	transporter	mannopine transport system substrate-binding protein
benE	aromatic	transporter	benzoate membrane transport protein
betL	aminoacid	transporter	glycine betaine transporter
betL	osmolyte	transporter	glycine betaine transporter
betT	aminoacid	transporter	choline/glycine/proline betaine transport protein
betT	osmolyte	transporter	choline/glycine/proline betaine transport protein
betT	osmolyte	transporter	choline/glycine/proline betaine transport protein
bglEIIA	carbohydrate	transporter	PTS system, beta-glucosides-specific IIA component [EC:2.7.1.69]
bglEIIB	carbohydrate	transporter	PTS system, beta-glucosides-specific IIB component [EC:2.7.1.69]
bglEIIC	carbohydrate	transporter	PTS system, beta-glucosides-specific IIC component
bglH	carbohydrate	transporter	carbohydrate-specific outer membrane porin
bgtA	aminoacid	transporter	arginine/lysine/histidine/glutamine transport system ATP-binding protein [EC:3.6.3.-]
bgtB	aminoacid	transporter	arginine/lysine/histidine/glutamine transport system substrate-binding and permease protein
bioM	vitamin	transporter	biotin transport system ATP-binding protein [EC:3.6.3.-]
bioN	vitamin	transporter	biotin transport system permease protein
bioY	vitamin	transporter	biotin transport system substrate-specific component
btuB	vitamin	transporter	vitamin B12 transporter
btuC	vitamin	transporter	vitamin B12 transport system permease protein
btuD	vitamin	transporter	vitamin B12 transport system ATP-binding protein [EC:3.6.3.33]
btuF	vitamin	transporter	vitamin B12 transport system substrate-binding protein
bxlE	carbohydrate	transporter	xylobiose transport system substrate-binding protein
bxlF	carbohydrate	transporter	xylobiose transport system permease protein
bxlG	carbohydrate	transporter	xylobiose transport system permease protein
cbiK	ion	transporter	nickel transport protein
cbiL	ion	transporter	nickel transport protein
cbiM	ion	transporter	cobalt/nickel transport system permease protein
cbiN	ion	transporter	cobalt/nickel transport protein
cbiO	ion	transporter	cobalt/nickel transport system ATP-binding protein
cbiQ	ion	transporter	cobalt/nickel transport system permease protein
ccmA	siderophore	export	heme exporter protein A [EC:3.6.3.41]
ccmB	siderophore	export	heme exporter protein B
ccmC	siderophore	export	heme exporter protein C
ccmD	siderophore	export	heme exporter protein D
cebE	carbohydrate	transporter	cellobiose transport system substrate-binding protein
cebF	carbohydrate	transporter	cellobiose transport system permease protein
cebG	carbohydrate	transporter	cellobiose transport system permease protein
celEIIA	carbohydrate	transporter	PTS system, cellobiose-specific IIA component [EC:2.7.1.69]
celEIIB	carbohydrate	transporter	PTS system, cellobiose-specific IIB component [EC:2.7.1.69]
celEIIC	carbohydrate	transporter	PTS system, cellobiose-specific IIC component
cfrA	siderophore	transporter	outer membrane receptor for ferrienterochelin and colicins
chaA	ion	transporter	Ca2+:H+ antiporter
chiE	carbohydrate	transporter	putative chitobiose transport system substrate-binding protein
chiF	carbohydrate	transporter	putative chitobiose transport system permease protein
chiG	carbohydrate	transporter	putative chitobiose transport system permease protein
citA	carboxylate	transporter	MFS transporter, MHS family, citrate/tricarballylate:H+ symporter
citT	carboxylate	transporter	citrate:succinate antiporter
cmlA	carbohydrate	transporter	MFS transporter, DHA1 family, florfenicol/chloramphenicol resistance protein
cmpA	ion	transporter	bicarbonate transport system substrate-binding protein
cmpB	ion	transporter	bicarbonate transport system permease protein
cmpC	ion	transporter	bicarbonate transport system ATP-binding protein [EC:3.6.3.-]
cmpD	ion	transporter	bicarbonate transport system ATP-binding protein [EC:3.6.3.-]
codB	nucleic.acid	transporter	cytosine permease
corA	ion	transporter	magnesium transporter
cusA	ion	export	Cu(I)/Ag(I) efflux system membrane protein CusA/SilA
cusC	ion	export	outer membrane protein, Cu(I)/Ag(I) efflux system
cycA	aminoacid	transporter	D-serine/D-alanine/glycine transporter
cysA	sulfur	transporter	sulfate/thiosulfate transport system ATP-binding protein [EC:7.3.2.3]
cysP	sulfur	transporter	sulfate transport system substrate-binding protein
cysU	sulfur	transporter	sulfate transport system permease protein
cysW	sulfur	transporter	sulfate transport system permease protein
czcA	ion	transporter	cobalt-zinc-cadmium resistance protein CzcA
czcC	ion	transporter	outer membrane protein, cobalt-zinc-cadmium efflux system
czcD	ion	transporter	cobalt-zinc-cadmium efflux system protein
dasA	carbohydrate	transporter	N,N'-diacetylchitobiose transport system substrate-binding protein
dasB	carbohydrate	transporter	N,N'-diacetylchitobiose transport system permease protein
dasC	carbohydrate	transporter	N,N'-diacetylchitobiose transport system permease protein
dctA	carboxylate	transporter	aerobic C4-dicarboxylate transport protein
dctA	nitrogen.compound	transporter	aerobic C4-dicarboxylate transport protein
dctM	carboxylate	transporter	C4-dicarboxylate transporter, DctM subunit
dctP	carboxylate	transporter	C4-dicarboxylate-binding protein DctP
dctQ	carboxylate	transporter	C4-dicarboxylate transporter, DctQ subunit
dcuA	carboxylate	transporter	anaerobic C4-dicarboxylate transporter DcuA
dcuB	carboxylate	transporter	anaerobic C4-dicarboxylate transporter DcuB
dcuC	carboxylate	transporter	C4-dicarboxylate transporter, DcuC family
dgaEIIA	carboxylate	transporter	PTS system, D-glucosaminate-specific IIA component [EC:2.7.1.69]
dgaEIIB	carboxylate	transporter	PTS system, D-glucosaminate-specific IIB component [EC:2.7.1.69]
dgaEIIC	carboxylate	transporter	PTS system, D-glucosaminate-specific IIC component
dgaEIID	carboxylate	transporter	PTS system, D-glucosaminate-specific IID component
dglEIIA	carbohydrate	transporter	PTS system, D-glucosamine-specific IIA component [EC:2.7.1.69]
dglEIIB	carbohydrate	transporter	PTS system, D-glucosamine-specific IIB component [EC:2.7.1.69]
dglEIIC	carbohydrate	transporter	PTS system, D-glucosamine-specific IIC component
dltB	alanine	export	membrane protein involved in D-alanine export
dppA1	peptide	transporter	dipeptide transport system substrate-binding protein
dppB1	peptide	transporter	dipeptide transport system permease protein
dppB2	peptide	transporter	dipeptide transport system permease protein
dppC1	peptide	transporter	dipeptide transport system permease protein
dppC2	peptide	transporter	dipeptide transport system permease protein
dppD1	peptide	transporter	dipeptide transport system ATP-binding protein
dppD2	peptide	transporter	dipeptide transport system ATP-binding protein
dppE	peptide	transporter	dipeptide transport system substrate-binding protein
dppF1	peptide	transporter	dipeptide transport system ATP-binding protein
dsdX	aminoacid	transporter	D-serine transporter
ecfA1	vitamin	transporter	energy-coupling factor transport system ATP-binding protein [EC:3.6.3.-]
ecfA2	vitamin	transporter	energy-coupling factor transport system ATP-binding protein [EC:7.-.-.-]
ecfT	vitamin	transporter	energy-coupling factor transport system permease protein
efeB	ion	transporter	deferrochelatase/peroxidase EfeB [EC:1.11.1.-]
efeO	ion	transporter	iron uptake system component EfeO
emrY	lipid	transporter	MFS transporter, DHA2 family, multidrug resistance protein
emrY	lipid	transporter	MFS transporter, DHA2 family, multidrug resistance protein
entS	siderophore	transporter	MFS transporter, ENTS family, enterobactin (siderophore) exporter
eryE	carbohydrate	transporter	erythritol transport system ATP-binding protein
eryF	carbohydrate	transporter	erythritol transport system permease protein
eryG	carbohydrate	transporter	erythritol transport system substrate-binding protein
exbB	biopolymer	transporter	biopolymer transport protein ExbB
exbD	biopolymer	transporter	biopolymer transport protein ExbD
fadL	lipid	transporter	long-chain fatty acid transport protein
fadL	lipid	transporter	long-chain fatty acid transport protein
fdhC	carboxylate	transporter	formate transporter
fecA	carboxylate	transporter	Fe(3+) dicitrate transport protein
fecA	siderophore	transporter	Fe(3+) dicitrate transport protein
fecB	carboxylate	transporter	ferric citrate transport system substrate-binding protein
fecB	siderophore	transporter	ferric citrate transport system substrate-binding protein
fecC	carboxylate	transporter	ferric citrate transport system permease protein
fecC	siderophore	transporter	ferric citrate transport system permease protein
fecD	carboxylate	transporter	ferric citrate transport system permease protein
fecD	siderophore	transporter	ferric citrate transport system permease protein
fecE	carboxylate	transporter	ferric citrate transport system ATP-binding protein [EC:7.2.2.18]
fecE	siderophore	transporter	ferric citrate transport system ATP-binding protein [EC:7.2.2.18]
fepA	siderophore	transporter	ferric enterobactin receptor
fepB	siderophore	transporter	ferric enterobactin transport system substrate-binding protein
fepC	siderophore	transporter	ferric enterobactin transport system ATP-binding protein
fepD	siderophore	transporter	ferric enterobactin transport system permease protein
fepG	siderophore	transporter	ferric enterobactin transport system permease protein
fevA	ion	transporter	iron complex transport system ATP-binding protein [EC:3.6.3.34]
fevP	ion	transporter	iron complex transport system permease protein
fevS	ion	transporter	iron complex transport system substrate-binding protein
fhuB	siderophore	transporter	ferric hydroxamate transport system permease protein
fhuC	siderophore	transporter	iron-chelate-transporting ATPase [EC:3.6.3.34]
fhuD	siderophore	transporter	ferric hydroxamate transport system substrate-binding protein
fieF	ion	export	ferrous-iron efflux pump FieF
fieF	ion	export	ferrous-iron efflux pump FieF
fieF	ion	export	ferrous-iron efflux pump FieF
fiu	siderophore	transporter	catecholate siderophore receptor
focA	carboxylate	transporter	formate transporter
focB	carboxylate	transporter	formate transporter
fpvA	siderophore	transporter	outer-membrane receptor for ferric coprogen and ferric-rhodotorulic acid
frcA	carbohydrate	transporter	fructose transport system ATP-binding protein
frcB	carbohydrate	transporter	fructose transport system substrate-binding protein
frcC	carbohydrate	transporter	fructose transport system permease protein
fru1EIIA	carbohydrate	transporter	PTS system, fructose-specific IIA component [EC:2.7.1.69]
fru1EIIB	carbohydrate	transporter	PTS system, fructose-specific IIB component [EC:2.7.1.69]
fru1EIIC	carbohydrate	transporter	PTS system, fructose-specific IIC component
fru2EIIA	carbohydrate	transporter	PTS system, fructose-specific IIA-like component [EC:2.7.1.69]
fru2EIIB	carbohydrate	transporter	PTS system, fructose-specific IIB-like component [EC:2.7.1.69]
fru2EIIC	carbohydrate	transporter	PTS system, fructose-specific IIC-like component
ftrA	ion	transporter	periplasmic iron binding protein
galEIIA	carbohydrate	transporter	PTS system, galactose-specific IIA component [EC:2.7.1.204]
galEIIB	carbohydrate	transporter	PTS system, galactose-specific IIB component [EC:2.7.1.204]
galEIIC	carbohydrate	transporter	PTS system, galactose-specific IIC component
galP	carbohydrate	transporter	MFS transporter, SP family, galactose:H+ symporter
gamEIIB	carbohydrate	transporter	PTS system, galactosamine-specific IIB component [EC:2.7.1.69]
gamEIIC	carbohydrate	transporter	PTS system, galactosamine-specific IIC component
gamEIID	carbohydrate	transporter	PTS system, galactosamine-specific IID component
ganO	carbohydrate	transporter	arabinogalactan oligomer / maltooligosaccharide transport system substrate-binding protein
ganP	carbohydrate	transporter	arabinogalactan oligomer / maltooligosaccharide transport system permease protein
ganQ	carbohydrate	transporter	arabinogalactan oligomer / maltooligosaccharide transport system permease protein
gatEIIA	carbohydrate	transporter	PTS system, galactitol-specific IIA component [EC:2.7.1.69]
gatEIIB	carbohydrate	transporter	PTS system, galactitol-specific IIB component [EC:2.7.1.69]
gatEIIC	carbohydrate	transporter	PTS system, galactitol-specific IIC component
gesB	ion	export	gold/copper resistance efflux pump
gfrEIIA	carbohydrate	transporter	PTS system, fructoselysine and glucoselysine-specific IIA component [EC:2.7.1.69]
gfrEIIA	lipid	transporter	PTS system, fructoselysine and glucoselysine-specific IIA component [EC:2.7.1.69]
gfrEIIB	carbohydrate	transporter	PTS system, fructoselysine and glucoselysine-specific IIB component [EC:2.7.1.69]
gfrEIIB	lipid	transporter	PTS system, fructoselysine and glucoselysine-specific IIB component [EC:2.7.1.69]
gfrEIIC	carbohydrate	transporter	PTS system, fructoselysine and glucoselysine-specific IIC component
gfrEIIC	lipid	transporter	PTS system, fructoselysine and glucoselysine-specific IIC component
gfrEIID	carbohydrate	transporter	PTS system, fructoselysine and glucoselysine-specific IID component
gfrEIID	lipid	transporter	PTS system, fructoselysine and glucoselysine-specific IID component
gguA	carbohydrate	transporter	putative multiple sugar transport system ATP-binding protein
gguP	carbohydrate	transporter	putative multiple sugar transport system permease protein
gguS	carbohydrate	transporter	putative multiple sugar transport system substrate-binding protein
glc1EIIA	carbohydrate	transporter	PTS system, glucose-specific IIA component [EC:2.7.1.69]
glc1EIIB	carbohydrate	transporter	PTS system, glucose-specific IIB component [EC:2.7.1.69]
glc1EIIC	carbohydrate	transporter	PTS system, glucose-specific IIC component
glc2EIIA	carbohydrate	transporter	PTS system, glucose-specific IIA component
glc2EIIB	carbohydrate	transporter	PTS system, glucose-specific IIB component
glc2EIIC	carbohydrate	transporter	glucose PTS system EIICBA or EIICB component
glcA	carbohydrate	transporter	glucose/arabinose transport system ATP-binding protein
glcP	carbohydrate	transporter	glucose/arabinose transport system permease protein
glcP1	carbohydrate	transporter	glucose/arabinose transport system permease protein
glcS	carbohydrate	transporter	glucose/arabinose transport system substrate-binding protein
glcT1	carbohydrate	transporter	MFS transporter, FHS family, glucose/mannose:H+ symporter
glcU	carbohydrate	transporter	glucose uptake protein
glf	carbohydrate	transporter	MFS transporter, SP family, glucose uniporter
glnH	aminoacid	transporter	glutamine transport system substrate-binding protein
glnP	aminoacid	transporter	glutamine transport system permease protein
glnQ	aminoacid	transporter	glutamine transport system ATP-binding protein [EC:3.6.3.-]
glpP	lipid	transporter	glycerol transport system permease protein
glpQ	lipid	transporter	glycerol transport system permease protein
glpS	lipid	transporter	glycerol transport system ATP-binding protein
glpT	lipid	transporter	glycerol transport system ATP-binding protein
glpV	lipid	transporter	glycerol transport system substrate-binding protein
gltI	aminoacid	transporter	glutamate/aspartate transport system substrate-binding protein
gltJ	aminoacid	transporter	glutamate/aspartate transport system permease protein
gltK	aminoacid	transporter	glutamate/aspartate transport system permease protein
gltL	aminoacid	transporter	glutamate/aspartate transport system ATP-binding protein [EC:3.6.3.-]
gltP	aminoacid	transporter	proton glutamate symport protein
glucP	carbohydrate	transporter	MFS transporter, FHS family, L-fucose permease
glvEIIB	carbohydrate	transporter	PTS system, arbutin-like IIB component [EC:2.7.1.69]
glvEIIC	carbohydrate	transporter	PTS system, arbutin-like IIC component
glycA	carboxylate	transporter	glycolate permease
gntP	carbohydrate	transporter	high-affinity gluconate transporter
gntT	carbohydrate	transporter	Gnt-I system high-affinity gluconate transporter
gntU	carbohydrate	transporter	Gnt-I system low-affinity gluconate transporter
gsiA	peptide	transporter	glutathione transport system ATP-binding protein
gsiB	peptide	transporter	glutathione transport system substrate-binding protein
gsiC	peptide	transporter	glutathione transport system permease protein
gsiD	peptide	transporter	glutathione transport system permease protein
gtsA	carbohydrate	transporter	glucose/mannose transport system substrate-binding protein
gtsB	carbohydrate	transporter	glucose/mannose transport system permease protein
gtsC	carbohydrate	transporter	glucose/mannose transport system permease protein
gutA	carbohydrate	transporter	probable glucitol transport protein GutA
gutEIIA	carbohydrate	transporter	PTS system, glucitol/sorbitol-specific IIA component [EC:2.7.1.69]
gutEIIB	carbohydrate	transporter	PTS system, glucitol/sorbitol-specific IIB component [EC:2.7.1.69]
gutEIIC	carbohydrate	transporter	PTS system, glucitol/sorbitol-specific IIC component
hasA	siderophore	transporter	heme acquisition protein HasA
hasR	other	transporter	heme acquisition protein HasR
hcaT	carbohydrate	transporter	MFS transporter, PPP family, 3-phenylpropionic acid transporter
hisJ	aminoacid	transporter	histidine transport system substrate-binding protein
hisM	aminoacid	transporter	histidine transport system permease protein
hisP	aminoacid	transporter	histidine transport system ATP-binding protein [EC:3.6.3.21]
hisQ	aminoacid	transporter	histidine transport system permease protein
hpt	carbohydrate	transporter	MFS transporter, OPA family, glycerol-3-phosphate transporter
hpt	carbohydrate	transporter	MFS transporter, OPA family, glycerol-3-phosphate transporter
hrtA	ion	transporter	hemin transport system ATP-binding protein [EC:3.6.3.-]
hrtB	ion	transporter	hemin transport system permease protein
hutM	aminoacid	transporter	histidine permease
hutT	aminoacid	transporter	histidine transporter
hxt	carbohydrate	transporter	MFS transporter, SP family, sugar:H+ symporter
iatA1	osmolyte	transporter	inositol transport system ATP-binding protein
iatA2	osmolyte	transporter	inositol transport system ATP-binding protein
iatP1	osmolyte	transporter	inositol transport system permease protein
iatP2	osmolyte	transporter	inositol transport system permease protein
ibpA1	osmolyte	transporter	inositol transport system substrate-binding protein
ibpA2	osmolyte	transporter	inositol transport system substrate-binding protein
idnT	carbohydrate	transporter	Gnt-II system L-idonate transporter
inoE	p.compound	transporter	inositol-phosphate transport system substrate-binding protein
inoE	osmolyte	transporter	inositol-phosphate transport system substrate-binding protein
inoF	p.compound	transporter	inositol-phosphate transport system permease protein
inoF	osmolyte	transporter	inositol-phosphate transport system permease protein
inoG	p.compound	transporter	inositol-phosphate transport system permease protein
inoG	osmolyte	transporter	inositol-phosphate transport system permease protein
inoK	p.compound	transporter	inositol-phosphate transport system ATP-binding protein
inoK	osmolyte	transporter	inositol-phosphate transport system ATP-binding protein
iolF	osmolyte	transporter	MFS transporter, SP family, inositol transporter
kdgM	carbohydrate	transporter	oligogalacturonate-specific porin family protein
kdgT	carbohydrate	transporter	2-keto-3-deoxygluconate permease
kgtP	carbohydrate	transporter	MFS transporter, MHS family, alpha-ketoglutarate permease
kup	ion	transporter	KUP system potassium uptake protein
lacE	carbohydrate	transporter	lactose/L-arabinose transport system substrate-binding protein
lacEIIA	carbohydrate	transporter	PTS system, lactose-specific IIA component [EC:2.7.1.69]
lacEIIB	carbohydrate	transporter	PTS system, lactose-specific IIB component [EC:2.7.1.69]
lacEIIC	carbohydrate	transporter	PTS system, lactose-specific IIC component
lacF	carbohydrate	transporter	lactose/L-arabinose transport system permease protein
lacG	carbohydrate	transporter	lactose/L-arabinose transport system permease protein
lacK	carbohydrate	transporter	lactose/L-arabinose transport system ATP-binding protein
lacS	carbohydrate	transporter	lactose/raffinose/galactose permease
lacS	carbohydrate	transporter	lactose/raffinose/galactose permease
lamB	carbohydrate	transporter	maltoporin
lctB	ion	transporter	potassium channel LctB
lctP1	carboxylate	transporter	L-lactate permease
lctP2	carboxylate	transporter	lactate permease
levG	carbohydrate	transporter	PTS system, fructose-specific IID component
lhpM	aminoacid	transporter	hydroxyproline transport system permease protein
lhpN	aminoacid	transporter	hydroxyproline transport system permease protein
lhpO	aminoacid	transporter	hydroxyproline transport system ATP-binding protein
lhpP	aminoacid	transporter	hydroxyproline transporter system substrate-binding protein
livF	aminoacid	transporter	branched-chain amino acid transport system ATP-binding protein
livG	aminoacid	transporter	branched-chain amino acid transport system ATP-binding protein
livH	aminoacid	transporter	branched-chain amino acid transport system permease protein
livK	aminoacid	transporter	branched-chain amino acid transport system substrate-binding protein
livM	aminoacid	transporter	branched-chain amino acid transport system permease protein
lplA	lipid	transporter	putative aldouronate transport system substrate-binding protein
lplB	lipid	transporter	putative aldouronate transport system permease protein
lplC	lipid	transporter	putative aldouronate transport system permease protein
lplT	lipid	transporter	MFS transporter, LPLT family, lysophospholipid transporter
lysE	aminoacid	export	L-lysine exporter family protein LysE/ArgO
lysP	aminoacid	transporter	lysine-specific permease
lysX1	aminoacid	transporter	putative lysine transport system substrate-binding protein
lysX2	aminoacid	transporter	putative lysine transport system permease protein
lysY	aminoacid	transporter	putative lysine transport system ATP-binding protein [EC:3.6.3.-]
maeN	carboxylate	transporter	malate:Na+ symporter
malE	carbohydrate	transporter	maltose/maltodextrin transport system substrate-binding protein
malEIIB	carbohydrate	transporter	maltose PTS system EIICB or EIICBA component
malEIIC	carbohydrate	transporter	maltose PTS system EIICB or EIICBA component
malF	carbohydrate	transporter	maltose/maltodextrin transport system permease protein
malG	carbohydrate	transporter	maltose/maltodextrin transport system permease protein
malglcEIIB	carbohydrate	transporter	PTS system, maltose and glucose-specific IIB component [EC:2.7.1.69]
malglcEIIC	carbohydrate	transporter	PTS system, maltose and glucose-specific IIC component
malK	carbohydrate	transporter	multiple sugar transport system ATP-binding protein [EC:3.6.3.-]
malQ	carbohydrate	transporter	4-alpha-glucanotransferase [EC:2.4.1.25]
malY	carbohydrate	transporter	maltose/maltooligosaccharide transporter
manEIIA	carbohydrate	transporter	PTS system, mannose-specific IIA component [EC:2.7.1.69]
manEIIB	carbohydrate	transporter	PTS system, mannose-specific IIB component [EC:2.7.1.69]
manEIIC	carbohydrate	transporter	PTS system, mannose-specific IIC component
manEIID	carbohydrate	transporter	PTS system, mannose-specific IID component
mdcF	carboxylate	transporter	malonate transporter
mdtD	carbohydrate	transporter	MFS transporter, DHA2 family, multidrug resistance protein
melB	carbohydrate	transporter	melibiose permease
merC	ion	transporter	mercuric ion transport protein
merE	ion	transporter	mercuric ion transport protein
merP	ion	transporter	periplasmic mercuric ion binding protein
merT	ion	transporter	mercuric ion transport protein
metI	aminoacid	transporter	D-methionine transport system permease protein
metN	aminoacid	transporter	D-methionine transport system ATP-binding protein
metQ	aminoacid	transporter	D-methionine transport system substrate-binding protein
mfs.cp	carbohydrate	transporter	MFS transporter, CP family, cyanate transporter
mfs.set	carbohydrate	export	MFS transporter, SET family, sugar efflux transporter
mglA	carbohydrate	transporter	methyl-galactoside transport system ATP-binding protein [EC:3.6.3.17]
mglB	carbohydrate	transporter	methyl-galactoside transport system substrate-binding protein
mglC	carbohydrate	transporter	methyl-galactoside transport system permease protein
mgtE	ion	transporter	magnesium transporter
mhpT	carbohydrate	transporter	MFS transporter, AAHS family, 3-hydroxyphenylpropionic acid transporter
mlaA	lipid	transporter	phospholipid-binding lipoprotein MlaA
mlaB	lipid	transporter	phospholipid transport system transporter-binding protein
mlaC	lipid	transporter	phospholipid transport system substrate-binding protein
mlaD	lipid	transporter	phospholipid/cholesterol/gamma-HCH transport system substrate-binding protein
mlaE	lipid	transporter	phospholipid/cholesterol/gamma-HCH transport system permease protein
mlaF	lipid	transporter	phospholipid/cholesterol/gamma-HCH transport system ATP-binding protein
mleP	carboxylate	transporter	uncharacterized protein
mmoD	ion	transporter	methane monooxygenase component D
mmpL11	siderophore	transporter	heme transporter
mmuP	aminoacid	transporter	S-methylmethionine transporter
mnA	ion	transporter	manganese/iron transport system ATP-binding protein
mngEIIA	lipid	transporter	PTS system, 2-O-A-mannosyl-D-glycerate-specific IIA component [EC:2.7.1.69]
mngEIIB	lipid	transporter	PTS system, 2-O-A-mannosyl-D-glycerate-specific IIB component [EC:2.7.1.69]
mngEIIC	lipid	transporter	PTS system, 2-O-A-mannosyl-D-glycerate-specific IIC component
mnhA	ion	transporter	multicomponent Na+:H+ antiporter subunit A
mnhB	ion	transporter	multicomponent Na+:H+ antiporter subunit B
mnhC	ion	transporter	multicomponent Na+:H+ antiporter subunit C
mnhD	ion	transporter	multicomponent Na+:H+ antiporter subunit D
mnhE	ion	transporter	multicomponent Na+:H+ antiporter subunit E
mnhF	ion	transporter	multicomponent Na+:H+ antiporter subunit F
mnhG	ion	transporter	multicomponent Na+:H+ antiporter subunit G
mnP	ion	transporter	manganese/iron transport system permease protein
mnS	ion	transporter	manganese/iron transport system substrate-binding protein
mntA1	ion	transporter	manganese transport system ATP-binding protein
mntA2	ion	transporter	manganese transport system ATP-binding protein
mntB1	ion	transporter	manganese transport system permease protein
mntB2	ion	transporter	manganese transport system permease protein
mntC1	ion	transporter	manganese transport system substrate-binding protein
mntC2	ion	transporter	manganese transport system substrate-binding protein
mntH	ion	transporter	manganese transport protein
mntP	ion	export	manganese efflux pump family protein
modA	ion	transporter	molybdate transport system substrate-binding protein
modB	ion	transporter	molybdate transport system permease protein
modC	ion	transporter	molybdate transport system ATP-binding protein [EC:3.6.3.29]
modF	ion	transporter	molybdate transport system ATP-binding protein
msbA	lipid	transporter	ATP-binding cassette, subfamily B, bacterial MsbA [EC:3.6.3.-]
msmE1	carbohydrate	transporter	fructooligosaccharide transport system substrate-binding protein
msmE2	carbohydrate	transporter	raffinose/stachyose/melibiose transport system substrate-binding protein
msmF1	carbohydrate	transporter	fructooligosaccharide transport system permease protein
msmF2	carbohydrate	transporter	raffinose/stachyose/melibiose transport system permease protein
msmG1	carbohydrate	transporter	fructooligosaccharide transport system permease protein
msmG2	carbohydrate	transporter	raffinose/stachyose/melibiose transport system permease protein
msmX	carbohydrate	transporter	multiple sugar transport system ATP-binding protein
mthK	ion	transporter	voltage-gated potassium channel
mtlE	carbohydrate	transporter	sorbitol/mannitol transport system substrate-binding protein
mtlEIIA	carbohydrate	transporter	PTS system, mannitol-specific IIA component [EC:2.7.1.69]
mtlEIIB	carbohydrate	transporter	PTS system, mannitol-specific IIB component [EC:2.7.1.69]
mtlEIIC	carbohydrate	transporter	PTS system, mannitol-specific IIC component
mtlF	carbohydrate	transporter	sorbitol/mannitol transport system permease protein
mtlG	carbohydrate	transporter	sorbitol/mannitol transport system permease protein
mtr	aminoacid	transporter	tryptophan-specific transport protein
mtsA	ion	transporter	iron/zinc/copper transport system substrate-binding protein
mtsA	ion	transporter	iron/zinc/copper transport system substrate-binding protein
mtsB	ion	transporter	iron/zinc/copper transport system ATP-binding protein
mtsB	ion	transporter	iron/zinc/copper transport system ATP-binding protein
mtsC	ion	transporter	iron/zinc/copper transport system permease protein
mtsC	ion	transporter	iron/zinc/copper transport system permease protein
murEIIB	lipid	transporter	PTS system, N-acetylmuramic acid-specific IIB component [EC:2.7.1.69]
murEIIC	lipid	transporter	PTS system, N-acetylmuramic acid-specific IIC component
nagEIIA	carbohydrate	transporter	PTS system, N-acetylglucosamine-specific IIA component [EC:2.7.1.69]
nagEIIB	carbohydrate	transporter	PTS system, N-acetylglucosamine-specific IIB component [EC:2.7.1.69]
nagEIIC	carbohydrate	transporter	PTS system, N-acetylglucosamine-specific IIC component
natA	ion	transporter	sodium transport system ATP-binding protein
natA1	aminoacid	transporter	neutral amino acid transport system ATP-binding protein
natB	ion	transporter	sodium transport system permease protein
natB1	aminoacid	transporter	neutral amino acid transport system substrate-binding protein
natC	aminoacid	transporter	neutral amino acid transport system permease protein
natC	ion	transporter	neutral amino acid transport system permease protein
natD1	aminoacid	transporter	neutral amino acid transport system permease protein
natE	aminoacid	transporter	neutral amino acid transport system ATP-binding protein
nepI	nucleic.acid	export	MFS transporter, DHA1 family, purine ribonucleoside efflux pump
ngcE	carbohydrate	transporter	N-acetylglucosamine transport system substrate-binding protein
ngcF	carbohydrate	transporter	N-acetylglucosamine transport system permease protein
ngcG	carbohydrate	transporter	N-acetylglucosamine transport system permease protein
nhaA	ion	transporter	Na+:H+ antiporter, NhaA family
nhaB	ion	transporter	Na+:H+ antiporter, NhaB family
nhaC	ion	transporter	Na+:H+ antiporter, NhaC family
niaX	vitamin	transporter	niacin transporter
nikA	ion	transporter	nickel transport system substrate-binding protein
nikB	ion	transporter	nickel transport system permease protein
nikC	ion	transporter	nickel transport system permease protein
nikD	ion	transporter	nickel transport system ATP-binding protein [EC:3.6.3.24]
nikE	ion	transporter	nickel transport system ATP-binding protein [EC:3.6.3.24]
nirC	nitrogen.compound	transporter	nitrite transporter NirC
nixA	ion	transporter	high-affinity nickel-transport protein
nixA	ion	transporter	high-affinity nickel-transport protein
nosF	ion	transporter	Cu-processing system ATP-binding protein
nosY	ion	transporter	Cu-processing system permease protein
nrsA	ion	export	cation efflux system protein involved in nickel and cobalt tolerance
nrsA	ion	export	cation efflux system protein involved in nickel and cobalt tolerance
nrtA	nitrogen.compound	transporter	nitrate/nitrite transport system substrate-binding protein
nrtB	nitrogen.compound	transporter	nitrate/nitrite transport system permease protein
nrtC	nitrogen.compound	transporter	nitrate/nitrite transport system ATP-binding protein [EC:3.6.3.-]
nrtD	nitrogen.compound	transporter	nitrate/nitrite transport system ATP-binding protein
ntrEIIA	nitrogen.compound	transporter	PTS system, nitrogen regulatory IIA component [EC:2.7.1.69]
nupC	nucleic.acid	transporter	nucleoside transport protein
nupG	nucleic.acid	transporter	MFS transporter, NHS family, nucleoside permease
nupX	nucleic.acid	transporter	nucleoside permease
occM	aminoacid	transporter	octopine/nopaline transport system permease protein
occP	aminoacid	transporter	octopine/nopaline transport system ATP-binding protein [EC:3.6.3.-]
occQ	aminoacid	transporter	octopine/nopaline transport system permease protein
occT	aminoacid	transporter	octopine/nopaline transport system substrate-binding protein
ompA	carbohydrate	transporter	major outer membrane protein
oppA1	peptide	transporter	oligopeptide transport system substrate-binding protein
oppB1	peptide	transporter	oligopeptide transport system permease protein
oppC1	peptide	transporter	oligopeptide transport system permease protein
oppD1	peptide	transporter	oligopeptide transport system ATP-binding protein
oppF1	peptide	transporter	oligopeptide transport system ATP-binding protein
oprB	carbohydrate	transporter	porin
oprB	lipid	transporter	porin
oprD	aminoacid	transporter	imipenem/basic amino acid-specific outer membrane pore [EC:3.4.21.-]
oprO_P	p.compound	transporter	phosphate-selective porin OprO and OprP
oxlT	carboxylate	transporter	MFS transporter, OFA family, oxalate/formate antiporter
paa	aminoacid	transporter	polar amino acid transport system substrate-binding protein
panF	vitamin	transporter	sodium/pantothenate symporter
pap	aminoacid	transporter	polar amino acid transport system permease protein
pas	aminoacid	transporter	polar amino acid transport system ATP-binding protein [EC:3.6.3.21]
pbuE	nucleic.acid	export	MFS transporter, DHA1 family, purine base/nucleoside efflux pump
pbuG	nucleic.acid	transporter	putative MFS transporter, AGZA family, xanthine/uracil permease
peb1A	aminoacid	transporter	putative glutamine transport system substrate-binding protein
peb1B	aminoacid	transporter	putative glutamine transport system permease protein
peb1C	aminoacid	transporter	putative glutamine transport system ATP-binding protein [EC:3.6.3.-]
phaA	ion	transporter	multicomponent K+:H+ antiporter subunit A
phaC	ion	transporter	multicomponent K+:H+ antiporter subunit C
phaD	ion	transporter	multicomponent K+:H+ antiporter subunit D
phaE	ion	transporter	multicomponent K+:H+ antiporter subunit E
phaF	ion	transporter	multicomponent K+:H+ antiporter subunit F
phaG	ion	transporter	multicomponent K+:H+ antiporter subunit G
pheP	aminoacid	transporter	phenylalanine-specific permease
phnC	p.compound	transporter	phosphonate transport system ATP-binding protein [EC:3.6.3.28]
phnD	p.compound	transporter	phosphonate transport system substrate-binding protein
phnE	p.compound	transporter	phosphonate transport system permease protein
phnS	p.compound	transporter	2-aminoethylphosphonate transport system substrate-binding protein
phnS	other	transporter	2-aminoethylphosphonate transport system substrate-binding protein
phnT	p.compound	transporter	2-aminoethylphosphonate transport system ATP-binding protein
phnT	other	transporter	2-aminoethylphosphonate transport system ATP-binding protein
phnU	p.compound	transporter	2-aminoethylphosphonate transport system permease protein
phnU	other	transporter	2-aminoethylphosphonate transport system permease protein
phnV	p.compound	transporter	2-aminoethylphosphonate transport system permease protein
phnV	other	transporter	2-aminoethylphosphonate transport system permease protein
PHO84	p.compound	transporter	MFS transporter, PHS family, inorganic phosphate transporter
phoE	p.compound	transporter	outer membrane pore protein E
pit	p.compound	transporter	low-affinity inorganic phosphate transporter
proP	aminoacid	transporter	MFS transporter, MHS family, proline/betaine transporter
proP	osmolyte	transporter	MFS transporter, MHS family, proline/betaine transporter
proY	aminoacid	transporter	proline-specific permease ProY
pstA	p.compound	transporter	phosphate transport system permease protein
pstB	p.compound	transporter	phosphate transport system ATP-binding protein [EC:3.6.3.27]
pstC	p.compound	transporter	phosphate transport system permease protein
pstS	p.compound	transporter	phosphate transport system substrate-binding protein
psuT	nucleic.acid	transporter	putative pseudouridine transporter
ptsO	nitrogen.compound	transporter	phosphocarrier protein NPr
ptsP	nitrogen.compound	transporter	phosphotransferase system, enzyme I, PtsP [EC:2.7.3.9]
pucJ	nitrogen.compound	transporter	uric acid permease
putP	aminoacid	transporter	sodium/proline symporter
puuP	aminoacid	transporter	putrescine importer
pvdE	siderophore	transporter	putative ATP-binding cassette transporter
rbsA	carbohydrate	transporter	ribose transport system ATP-binding protein [EC:3.6.3.17]
rbsB	carbohydrate	transporter	ribose transport system substrate-binding protein
rbsC	carbohydrate	transporter	ribose transport system permease protein
rbsU	carbohydrate	transporter	putative ribose uptake protein
rcnA	ion	export	nickel/cobalt exporter
rcnA	ion	export	nickel/cobalt exporter
rhaP	carbohydrate	transporter	rhamnose transport system permease protein
rhaQ	carbohydrate	transporter	rhamnose transport system permease protein
rhaS	carbohydrate	transporter	rhamnose transport system substrate-binding protein
rhaT1	carbohydrate	transporter	rhamnose transport system ATP-binding protein [EC:3.6.3.17]
rhaT2	carbohydrate	transporter	L-rhamnose-H+ transport protein
rhtA	aminoacid	transporter	inner membrane transporter RhtA
rhtB	aminoacid	export	homoserine/homoserine lactone efflux protein
ribP	vitamin	transporter	NitT/TauT family transport system permease protein
ribS	vitamin	transporter	NitT/TauT family transport system substrate-binding protein
rocE	aminoacid	transporter	arginine/ornithine permease
rutG	nucleic.acid	transporter	putative pyrimidine permease RutG
sam	vitamin	transporter	S-adenosylmethionine uptake transporter
sapA	peptide	transporter	cationic peptide transport system substrate-binding protein
sapB	peptide	transporter	cationic peptide transport system permease protein
sapC	peptide	transporter	cationic peptide transport system permease protein
sapD	peptide	transporter	cationic peptide transport system ATP-binding protein
sapF	peptide	transporter	cationic peptide transport system ATP-binding protein
satP	carboxylate	transporter	uncharacterized protein
satP	carboxylate	transporter	uncharacterized protein
sbp	sulfur	transporter	sulfate/thiosulfate transport system substrate-binding protein
scrEIIA	carbohydrate	transporter	PTS system, sucrose-specific IIA component [EC:2.7.1.69]
scrEIIB	carbohydrate	transporter	PTS system, sucrose-specific IIB component [EC:2.7.1.69]
scrEIIC	carbohydrate	transporter	PTS system, sucrose-specific IIC component
scrY	carbohydrate	transporter	sucrose porin
sdaC	aminoacid	transporter	serine transporter
sitA	ion	transporter	manganese/iron transport system substrate-binding protein
sitA	ion	transporter	manganese/iron transport system substrate-binding protein
sitB	ion	transporter	manganese/iron transport system ATP-binding protein
sitB	ion	transporter	manganese/iron transport system ATP-binding protein
sitC	ion	transporter	manganese/iron transport system permease protein
sitC	ion	transporter	manganese/iron transport system permease protein
sitD	ion	transporter	manganese/iron transport system permease protein
sitD	ion	transporter	manganese/iron transport system permease protein
sorEIIA	carbohydrate	transporter	PTS system, sorbose-specific IIA component [EC:2.7.1.69]
sorEIIB	carbohydrate	transporter	PTS system, sorbose-specific IIB component [EC:2.7.1.69]
sorEIIC	carbohydrate	transporter	PTS system, sorbose-specific IIC component
sorEIID	carbohydrate	transporter	PTS system, sorbose-specific IID component
sotB	carbohydrate	export	MFS transporter, DHA1 family, L-arabinose/isopropyl-beta-D-thiogalactopyranoside export protein
sstT	aminoacid	transporter	serine/threonine transporter
ssuA	sulfur	transporter	sulfonate transport system substrate-binding protein
ssuB	sulfur	transporter	sulfonate transport system ATP-binding protein [EC:3.6.3.-]
ssuC	sulfur	transporter	sulfonate transport system permease protein
sugA	carbohydrate	transporter	simple sugar transport system ATP-binding protein [EC:3.6.3.17]
sugP	carbohydrate	transporter	multiple sugar transport system permease protein
sugP1	carbohydrate	transporter	multiple sugar transport system permease protein
sugP2	carbohydrate	transporter	simple sugar transport system permease protein
sugS1	carbohydrate	transporter	multiple sugar transport system substrate-binding protein
sugS2	carbohydrate	transporter	simple sugar transport system substrate-binding protein
tagG	lipid	transporter	teichoic acid transport system permease protein
tagH	lipid	transporter	teichoic acid transport system ATP-binding protein [EC:3.6.3.40]
tauA	aminoacid	transporter	taurine transport system substrate-binding protein
tauB	aminoacid	transporter	taurine transport system ATP-binding protein [EC:3.6.3.36]
tauC	aminoacid	transporter	taurine transport system permease protein
tc.aat	aminoacid	transporter	amino acid transporter, AAT family
tc.agcs	aminoacid	transporter	alanine or glycine:cation symporter, AGCS family
tc.apa	aminoacid	transporter	basic amino acid/polyamine antiporter, APA family
tc.bat2	aminoacid	transporter	bacterial/archaeal transporter family-2 protein
tc.citmhs	ion	transporter	citrate-Mg2+:H+ or citrate-Ca2+:H+ symporter, CitMHS family
tc.cnt	nucleic.acid	transporter	concentrative nucleoside transporter, CNT family
tc.dass	carboxylate	transporter	divalent anion:Na+ symporter, DASS family
tc.fev	ion	transporter	iron complex outermembrane recepter protein
TC.GNTP	carbohydrate	transporter	gluconate:H+ symporter, GntP family
tc.gph	carbohydrate	transporter	glycoside/pentoside/hexuronide:cation symporter, GPH family
tc.livcs	aminoacid	transporter	branched-chain amino acid:cation transporter, LIVCS family
tc.ncs1	nucleic.acid	transporter	nucleobase:cation symporter-1, NCS1 family
tc.ncs2	nucleic.acid	transporter	nucleobase:cation symporter-2, NCS2 family
tc.pot	peptide	transporter	proton-dependent oligopeptide transporter, POT family
tc.sss	aminoacid	transporter	solute:Na+ symporter, SSS family
tc.sulp	carboxylate	transporter	sulfate permease, SulP family
tc_2.A.76.1.6	aminoacid	export	putative LysE/RhtB family amino acid efflux pump
tc2.A.86.1.7	siderophore	transporter	putative heme transporter
tctA	carboxylate	transporter	putative tricarboxylic transport membrane protein
tctB	carboxylate	transporter	putative tricarboxylic transport membrane protein
tctC	carboxylate	transporter	putative tricarboxylic transport membrane protein
tcyA	aminoacid	transporter	cystine transport system substrate-binding protein
tcyB	aminoacid	transporter	cystine transport system permease protein
tcyC	aminoacid	transporter	cystine transport system ATP-binding protein [EC:3.6.3.-]
tcyJ	aminoacid	transporter	L-cystine transport system substrate-binding protein
tcyK	aminoacid	transporter	L-cystine transport system substrate-binding protein
tcyL	aminoacid	transporter	L-cystine transport system permease protein
tcyM	aminoacid	transporter	L-cystine transport system permease protein
tcyN	aminoacid	transporter	L-cystine transport system ATP-binding protein [EC:3.6.3.-]
tdcC	aminoacid	transporter	threonine transporter
thiB	vitamin	transporter	thiamine transport system substrate-binding protein
thiP	vitamin	transporter	thiamine transport system permease protein
thiQ	vitamin	transporter	thiamine transport system ATP-binding protein
thiT	vitamin	transporter	thiamine transporter
thuE	carbohydrate	transporter	trehalose/maltose transport system substrate-binding protein
thuF	carbohydrate	transporter	trehalose/maltose transport system permease protein
thuG	carbohydrate	transporter	trehalose/maltose transport system permease protein
tnaB	aminoacid	transporter	low affinity tryptophan permease
togA	carbohydrate	transporter	oligogalacturonide transport system ATP-binding protein
togB	carbohydrate	transporter	oligogalacturonide transport system substrate-binding protein
togM	carbohydrate	transporter	oligogalacturonide transport system permease protein
togN	carbohydrate	transporter	oligogalacturonide transport system permease protein
togT	carbohydrate	transporter	oligogalacturonide transporter
tolQ	biopolymer	transporter	biopolymer transport protein TolQ
tolR	biopolymer	transporter	biopolymer transport protein TolR
treEIIA	carbohydrate	transporter	PTS system, trehalose-specific IIA component [EC:2.7.1.69]
treEIIB	carbohydrate	transporter	PTS system, trehalose-specific IIB component [EC:2.7.1.69]
treEIIC	carbohydrate	transporter	PTS system, trehalose-specific IIC component
trkA	ion	transporter	trk system potassium uptake protein
trkH	ion	transporter	trk system potassium uptake protein
troA	ion	transporter	manganese/zinc/iron transport system substrate-binding protein
troB	ion	transporter	manganese/zinc/iron transport system ATP- binding protein
troC	ion	transporter	manganese/zinc/iron transport system permease protein
troD	ion	transporter	manganese/zinc/iron transport system permease protein
trpA	aminoacid	transporter	putative ABC transport system ATP-binding protein
trpP	aminoacid	transporter	putative ABC transport system permease protein
trpS	aminoacid	transporter	putative ABC transport system substrate-binding protein
tsx	nucleic.acid	transporter	nucleoside-specific channel-forming protein
ttdT	carboxylate	transporter	L-tartrate/succinate antiporter
tupA	ion	transporter	tungstate transport system substrate-binding protein
tupB	ion	transporter	tungstate transport system permease protein
tupC	ion	transporter	tungstate transport system ATP-binding protein [EC:3.6.3.55]
tutB	aminoacid	transporter	tyrosine permease
tyrP	aminoacid	transporter	tyrosine-specific transport protein
uhpC	carbohydrate	transporter	MFS transporter, OPA family, sugar phosphate sensor protein UhpC
uidB	carbohydrate	transporter	glucuronide carrier protein
uidC	carbohydrate	transporter	putative glucuronide porin
ulaEIIA	vitamin	transporter	PTS system, ascorbate-specific IIA component [EC:2.7.1.69]
ulaEIIB	vitamin	transporter	PTS system, ascorbate-specific IIB component [EC:2.7.1.69]
ulaEIIC	vitamin	transporter	PTS system, ascorbate-specific IIC component
uraA	nucleic.acid	transporter	uracil permease
urtA	nitrogen.compound	transporter	urea transport system substrate-binding protein
urtB	nitrogen.compound	transporter	urea transport system permease protein
urtC	nitrogen.compound	transporter	urea transport system permease protein
urtD	nitrogen.compound	transporter	urea transport system ATP-binding protein
urtE	nitrogen.compound	transporter	urea transport system ATP-binding protein
utp	nitrogen.compound	transporter	urea transporter
wtpA	ion	transporter	molybdate/tungstate transport system substrate-binding protein
wtpB	ion	transporter	molybdate/tungstate transport system permease protein
wtpC	ion	transporter	molybdate/tungstate transport system ATP-binding protein [EC:3.6.3.- 3.6.3.55]
xanP	nucleic.acid	transporter	xanthine permease XanP
xanQ	nucleic.acid	transporter	xanthine permease XanQ
xapB	nucleic.acid	transporter	MFS transporter, NHS family, xanthosine permease
xltA	carbohydrate	transporter	putative xylitol transport system ATP-binding protein
xltB	carbohydrate	transporter	putative xylitol transport system permease protein
xltC	carbohydrate	transporter	putative xylitol transport system substrate-binding protein
xylE	carbohydrate	transporter	MFS transporter, SP family, xylose:H+ symportor
xylF	carbohydrate	transporter	D-xylose transport system substrate-binding protein
xylG	carbohydrate	transporter	D-xylose transport system ATP-binding protein [EC:3.6.3.17]
xylH	carbohydrate	transporter	D-xylose transport system permease protein
yahN	aminoacid	export	amino acid exporter
ydjE	vitamin	transporter	MFS transporter, putative metabolite:H+ symporter
yiaM	carboxylate	transporter	TRAP-type transport system small permease protein
yiaN	carboxylate	transporter	TRAP-type transport system large permease protein
yiaO	carboxylate	transporter	TRAP-type transport system periplasmic protein
yjbB	p.compound	transporter	phosphate:Na+ symporter
yjeH	aminoacid	export	amino acid efflux transporter
ylnA	sulfur	transporter	sulfate permease
ynfM	carbohydrate	transporter	MFS transporter, YNFM family, putative membrane transport protein
yqgE	alanine	transporter	MFS transporter, YQGE family, putative transporter
yrbG	ion	transporter	cation:H+ antiporter
ytrB	other	transporter	acetoin utilization transport system ATP-binding protein
ytrC_D	other	transporter	acetoin utilization transport system permease protein
ytrE	other	transporter	acetoin utilization transport system ATP-binding protein
ytrF	other	transporter	acetoin utilization transport system permease protein
yuiF	aminoacid	transporter	putative amino acid transporter
yxjA	nucleic.acid	transporter	purine nucleoside transport protein
yydI	peptide	transporter	putative peptide transport system ATP-binding protein
yydJ	peptide	transporter	putative peptide transport system permease protein
zipB	ion	transporter	zinc and cadmium transporter
zipB	ion	transporter	zinc and cadmium transporter
zmA	ion	transporter	zinc/manganese transport system ATP-binding protein
zmA	ion	transporter	zinc/manganese transport system ATP-binding protein
zmP	ion	transporter	zinc/manganese transport system permease protein
zmP	ion	transporter	zinc/manganese transport system permease protein
zmS	ion	transporter	zinc/manganese transport system substrate-binding protein
zmS	ion	transporter	zinc/manganese transport system substrate-binding protein
zntB	ion	transporter	zinc transporter
znuA	ion	transporter	zinc transport system substrate-binding protein
znuB	ion	transporter	zinc transport system permease protein
znuC	ion	transporter	zinc transport system ATP-binding protein [EC:3.6.3.-]
