# Supplementary material for: Y-A+S is the new Y-A-S: Updating microbial life history tradeoffs with comparative genomics
Source: Research Square preprint supplement (doi:10.21203/rs.3.rs-6486618/v1), 2025-05-02
Supplement: Supplementary file 45 [file Table_S5.xlsx]

## Sheet: microtrait_osymolites
microtrait_hmm-name	microtrait_hmm-description
algK	alginate biosynthesis protein AlgK
algE	alginate production protein
pslA	polysaccharide biosynthesis protein PslA
pslB	mannose-1-phosphate guanylyltransferase / mannose-6-phosphate isomerase [EC:2.7.7.13 5.3.1.8]
pslD	polysaccharide biosynthesis/export protein PslD
pslE	polysaccharide biosynthesis protein PslE
pslF	polysaccharide biosynthesis protein PslF
pslG	polysaccharide biosynthesis protein PslG
pslH	polysaccharide biosynthesis protein PslH
pslI	polysaccharide biosynthesis protein PslI
pslJ	polysaccharide biosynthesis protein PslJ
pslK	polysaccharide biosynthesis protein PslK
pslL	polysaccharide biosynthesis protein PslL
pelA	polysaccharide biosynthesis protein PelA
pelB	polysaccharide biosynthesis protein PelB
pelC	polysaccharide biosynthesis protein PelC
pelD	polysaccharide biosynthesis protein PelD
pelE	polysaccharide biosynthesis protein PelE
pelF	polysaccharide biosynthesis protein PelF
pelG	polysaccharide biosynthesis protein PelG
vexA	Vi polysaccharide export protein VexA
vexB	Vi polysaccharide transport system permease protein
vexC	Vi polysaccharide transport system ATP-binding protein [EC:7.6.2.12]
vexD	Vi polysaccharide transport system permease protein
lptA	lipopolysaccharide export system protein LptA
lptB	lipopolysaccharide export system ATP-binding protein [EC:7.5.2.5]
lptC	lipopolysaccharide export system protein LptC
lptD	LPS-assembly protein
lptE	LPS-assembly lipoprotein
lptF	lipopolysaccharide export system permease protein
lptG	lipopolysaccharide export system permease protein
wzxC	lipopolysaccharide exporter wzxC; colanic acid exporter
wcaB	putative colanic acid biosynthesis acetyltransferase WcaB [EC:2.3.1.-]
wcaC	putative colanic acid biosynthesis glycosyltransferase [EC:2.4.-.-]
wcaD	putative colanic acid polymerase wcaD; predicted colanic acid polymerase
wcaE	putative colanic acid biosynthesis glycosyltransferase [EC:2.4.-.-]
wcaF	putative colanic acid biosynthesis acetyltransferase WcaF [EC:2.3.1.-]
wcaI	colanic acid biosynthesis glycosyl transferase WcaI
wcaJ	putative colanic acid biosysnthesis UDP-glucose lipid carrier transferase
wcaK	colanic acid/amylovoran biosynthesis protein
wcaL	colanic acid/amylovoran biosynthesis glycosyltransferase [EC:2.4.-.-]
wcaM	colanic acid biosynthesis protein WcaM
exoF	exopolysaccharide production protein ExoF
exoY	exopolysaccharide production protein ExoY
ggs	glucosylglycerate synthase [EC:2.4.1.268]
mggS	mannosylglucosylglycerate synthase [EC:2.4.1.-]
gpgP	glucosyl-3-phosphoglycerate phosphatase [EC:3.1.3.85]
mggA	mannosylglucosyl-3-phosphoglycerate synthase [EC:2.4.1.270]
mgs	mannosylglycerate synthase [EC:2.4.1.269]
mngA	mannosyl-3-phosphoglycerate synthase [EC:2.4.1.217]
mngB	mannosyl-3-phosphoglycerate phosphatase [EC:3.1.3.70]
proV	glycine betaine/proline transport system ATP-binding protein [EC:3.6.3.32]
proW	glycine betaine/proline transport system permease protein
proX	glycine betaine/proline transport system substrate-binding protein
proP	MFS transporter, MHS family, proline/betaine transporter
betL	glycine betaine transporter
betT	choline/glycine/proline betaine transport protein
mscL	large conductance mechanosensitive channel
mscS	small conductance mechanosensitive channel
exoF	exopolysaccharide production protein ExoF
exoY	exopolysaccharide production protein ExoY
phoP	two-component system, OmpR family, response regulator PhoP
phoQ	two-component system, OmpR family, sensor histidine kinase PhoQ [EC:2.7.13.3]
otsA	trehalose 6-phosphate synthase [EC:2.4.1.15 2.4.1.347]
otsB	trehalose 6-phosphate phosphatase [EC:3.1.3.12]
tps	trehalose 6-phosphate synthase/phosphatase [EC:2.4.1.15 3.1.3.12]
proB	glutamate 5-kinase [EC:2.7.2.11]
proA	glutamate-5-semialdehyde dehydrogenase [EC:1.2.1.41]
proC	pyrroline-5-carboxylate reductase [EC:1.5.1.2]
ocd	ornithine cyclodeaminase [EC:4.3.1.12]
rocD	ornithine--oxo-acid transaminase [EC:2.6.1.13]
proC	pyrroline-5-carboxylate reductase [EC:1.5.1.2]
betA	choline dehydrogenase [EC:1.1.99.1]
gbsB	choline dehydrogenase [EC:1.1.1.1]
codA	choline oxidase [EC:1.1.3.17]
betB	betaine-aldehyde dehydrogenase [EC:1.2.1.8]
codA	choline oxidase [EC:1.1.3.17]
