# Supplementary material for: Y-A+S is the new Y-A-S: Updating microbial life history tradeoffs with comparative genomics
Source: Research Square preprint supplement (doi:10.21203/rs.3.rs-6486618/v1), 2025-05-02
Supplement: Supplementary file 53 [file Table_S7.xlsx]

## Sheet: microtrait_high_T
microtrait_hmm-name	microtrait_hmm-description
groES	chaperonin GroES, HSP10
grpE	molecular chaperone GrpE, HSP24
dnaJ	molecular chaperone DnaJ, HSP40
groEL	chaperonin GroEL, HSP60
cct	archaeal chaperonin, HSP60
dnaK	molecular chaperone DnaK, HSP70
clpA	ATP-dependent Clp protease ATP-binding subunit ClpA, HSP100
clpB	ATP-dependent Clp protease ATP-binding subunit ClpB, HSP100
clpC	ATP-dependent Clp protease ATP-binding subunit ClpC, HSP100
clpE	ATP-dependent Clp protease ATP-binding subunit ClpE, HSP100
clpL	ATP-dependent Clp protease ATP-binding subunit ClpL, HSP100
clpX	ATP-dependent Clp protease ATP-binding subunit ClpX, HSP100
hslU	ATP-dependent HslUV protease ATP-binding subunit HslU, HSP100
lon	ATP-dependent Lon protease [EC:3.4.21.53]
lonB	ATP-dependent Lon protease [EC:3.4.21.53]
hrcA	heat-inducible transcriptional repressor
