# Supplementary material for: Y-A+S is the new Y-A-S: Updating microbial life history tradeoffs with comparative genomics
Source: Research Square preprint supplement (doi:10.21203/rs.3.rs-6486618/v1), 2025-05-02
Supplement: Supplementary file 57 [file Table_S8.xlsx]

## Sheet: microtrait_pH_stress
microtrait_hmm-name	microtrait_hmm-description
clpA	ATP-dependent Clp protease ATP-binding subunit ClpA, HSP100
clpB	ATP-dependent Clp protease ATP-binding subunit ClpB, HSP100
clpC	ATP-dependent Clp protease ATP-binding subunit ClpC, HSP100
clpE	ATP-dependent Clp protease ATP-binding subunit ClpE, HSP100
clpL	ATP-dependent Clp protease ATP-binding subunit ClpL, HSP100
clpX	ATP-dependent Clp protease ATP-binding subunit ClpX, HSP100
hslU	ATP-dependent HslUV protease ATP-binding subunit HslU, HSP100
lon	ATP-dependent Lon protease [EC:3.4.21.53]
lonB	ATP-dependent Lon protease [EC:3.4.21.53]
hdeA	acid stress chaperone HdeA
hdeB	acid stress chaperone HdeB
cfa	cyclopropane-fatty-acyl-phospholipid synthase [EC:2.1.1.79]
oxyR	LysR family transcriptional regulator, hydrogen peroxide-inducible genes activator
soxR	MerR family transcriptional regulator, redox-sensitive transcriptional activator SoxR
perR	Fur family transcriptional regulator, peroxide stress response regulator
ohrR	MarR family transcriptional regulator, organic hydroperoxide resistance regulator
nrsS	two-component system, OmpR family, Ni(II)-sensor and/or redox sensor kinase NrsS [EC:2.7.13.3]
nrsR	two-component system, OmpR family, Ni(II)-responsive and/or redox-responsive regulator NrsR
arcA	two-component system, OmpR family, aerobic respiration control protein ArcA
arcB	two-component system, OmpR family, aerobic respiration control sensor histidine kinase ArcB [EC:2.7.13.3]
devS	two-component system, NarL family, sensor histidine kinase DevS [EC:2.7.13.3]
devR	two-component system, NarL family, response regulator DevR
regA	two-component system, response regulator RegA
regB	two-component system, sensor histidine kinase RegB [EC:2.7.13.3]
ureA	urease subunit gamma [EC:3.5.1.5]
ureB	urease subunit beta [EC:3.5.1.5]
ureC	urease subunit alpha [EC:3.5.1.5]
ureAB	urease subunit gamma/beta [EC:3.5.1.5]
rocF	arginase [EC:3.5.3.1]
adiA	arginine decarboxylase [EC:4.1.1.19]
speA	arginine decarboxylase [EC:4.1.1.19]
pdaD	arginine decarboxylase [EC:4.1.1.19]
adiC	arginine:agmatine antiporter
gadAB	glutamate decarboxylase [EC:4.1.1.15]
gadC	glutamate:GABA antiporter
glsA	glutaminase [EC:3.5.1.2]
cadA	lysine decarboxylase [EC:4.1.1.18]
cadB	cadaverine:lysine antiporter
speF	ornithine decarboxylase [EC:4.1.1.17]
potE	putrescine:ornithine antiporter
