# Supplementary material for: Y-A+S is the new Y-A-S: Updating microbial life history tradeoffs with comparative genomics
Source: Research Square preprint supplement (doi:10.21203/rs.3.rs-6486618/v1), 2025-05-02
Supplement: Supplementary file 61 [file Table_S9.xlsx]

## Sheet: cor_1
	OGT	MGT	Amino-transporter	GH-transporter	Total-transporter	Protein-enzyme	CAZy	pH-Tol	Temp-Tol	Biofilm	Osmolyte
OGT	1	0.21027	-0.0303116	-0.0114815	-0.104059	-0.163727	-0.0603243	-0.2513	-0.156194	-0.343811	-0.339329
MGT	0.21027	1	-0.572639	-0.394511	-0.523481	-0.507208	-0.0878188	-0.345214	-0.342729	-0.13537	-0.340721
Amino-transporter	-0.0303116	-0.572639	1	0.787471	0.924686	0.791428	0.256766	0.704487	0.615042	0.206208	0.592693
GH-transporter	-0.0114815	-0.394511	0.787471	1	0.860558	0.669776	0.543809	0.638996	0.518963	0.0551806	0.493642
Total-transporter	-0.104059	-0.523481	0.924686	0.860558	1	0.836885	0.390668	0.818428	0.67414	0.379791	0.749008
Protein-enzyme	-0.163727	-0.507208	0.791428	0.669776	0.836885	1	0.467785	0.809502	0.816814	0.406732	0.713551
CAZy	-0.0603243	-0.0878188	0.256766	0.543809	0.390668	0.467785	1	0.434268	0.395612	0.112604	0.274505
pH-Tol	-0.2513	-0.345214	0.704487	0.638996	0.818428	0.809502	0.434268	1	0.762149	0.547779	0.797559
Temp-Tol	-0.156194	-0.342729	0.615042	0.518963	0.67414	0.816814	0.395612	0.762149	1	0.381038	0.634913
Biofilm	-0.343811	-0.13537	0.206208	0.0551806	0.379791	0.406732	0.112604	0.547779	0.381038	1	0.816637
Osmolyte	-0.339329	-0.340721	0.592693	0.493642	0.749008	0.713551	0.274505	0.797559	0.634913	0.816637	1
